# Supplementary material for: Bioinformatic analysis identifies potentially key differentially expressed genes in oncogenesis and progression of clear cell renal cell carcinoma
Source: PeerJ. 2019 Nov 26;7:e8096. doi: 10.7717/peerj.8096 (PMC6883955; doi:10.7717/peerj.8096)
Supplement: File S1 [file peerj-07-8096-s001.xls]

## Sheet: stage one
genesymbol	logFC	AveExpr	t	P.Value	adj.P.Val	B
TNFAIP6	5.9206	6.31664	16.7023	1.51193e-21	1.0359e-19	38.8694
KISS1R	5.91203	6.73325	16.8789	9.8343e-22	7.0577e-20	39.2997
NPTX2	5.55696	6.56763	11.3971	3.29025e-15	3.75929e-14	24.2305
ANGPTL4	5.1011	8.08914	22.2901	7.57014e-27	3.04082e-24	51.0296
NDUFA4L2	4.73469	8.38163	19.1232	5.44648e-24	8.78556e-22	44.4893
HILPDA	4.50984	9.14484	20.8684	1.31339e-25	3.58749e-23	48.1975
CA9	4.02126	7.45816	16.1707	5.62861e-21	3.11642e-19	37.5537
TMEM45A	3.94128	6.66496	14.5232	4.0329e-19	1.31767e-17	33.2727
EGLN3	3.92555	7.88881	28.1069	2.60977e-31	5.34638e-28	61.1479
CTHRC1	3.91006	6.92596	10.2052	1.417e-13	1.11864e-12	20.4519
C3	3.86807	9.92637	12.9484	3.2302e-17	6.16144e-16	28.8738
CP	3.71976	6.45141	8.32885	7.46248e-11	3.52982e-10	14.1675
CDCA2	3.67686	5.57861	13.795	2.94799e-18	7.63496e-17	31.277
LINC00887	3.67589	5.11879	11.9033	7.03429e-16	9.63909e-15	25.78
COL23A1	3.63052	7.19	12.1382	3.47732e-16	5.18837e-15	26.4876
LOC102659288	3.6173	4.63295	6.64751	2.64084e-08	8.29503e-08	8.30593
DIRAS2	3.47078	4.72377	21.8169	1.92388e-26	6.79526e-24	50.1048
APOLD1	3.46509	9.34236	13.1981	1.57952e-17	3.29176e-16	29.5921
ENO2	3.4564	7.1028	15.0981	8.76886e-20	3.45459e-18	34.8027
NETO2	3.36972	6.46736	15.2679	5.62955e-20	2.33929e-18	35.2469
ANGPT2	3.34481	6.51172	15.5308	2.85183e-20	1.30408e-18	35.9284
IGFBP3	3.33958	10.7187	17.5602	1.92861e-22	1.73287e-20	40.9286
PLA2G7	3.33915	4.60129	15.3596	4.43729e-20	1.90571e-18	35.4854
VCAN	3.33146	7.92896	9.97796	2.9623e-13	2.19082e-12	19.7116
CYP2J2	3.31406	7.60937	8.46699	4.64594e-11	2.27696e-10	14.6421
INHBB	3.30653	7.51165	12.9469	3.2444e-17	6.18277e-16	28.8694
LPCAT1	3.22691	8.31237	20.708	1.82998e-25	4.86871e-23	47.8677
ADM	3.21091	10.6496	17.6032	1.7429e-22	1.60113e-20	41.0298
COL21A1	3.19056	6.54613	13.2105	1.52477e-17	3.18739e-16	29.6275
SEMA5B	3.15429	8.23916	16.9383	8.51676e-22	6.29871e-20	39.4436
FABP7	3.11107	4.7702	6.70792	2.13492e-08	6.79447e-08	8.51764
ENPP3	3.10571	7.90941	7.35954	2.16252e-09	8.014e-09	10.8009
LOX	3.07411	6.06192	13.3978	8.96272e-18	2.00011e-16	30.1609
LOC100132891	3.04656	5.87558	15.1619	7.42192e-20	2.98128e-18	34.9699
SCN4B	3.03974	5.89019	13.9984	1.68048e-18	4.65849e-17	31.841
ST8SIA4	3.01034	4.77242	19.6405	1.75758e-24	3.36503e-22	45.6165
C1QB	2.97543	8.33479	12.8025	4.92564e-17	8.96948e-16	28.4502
SPAG4	2.95083	7.05743	17.3659	3.05473e-22	2.54387e-20	40.4689
PLK2	2.90462	7.97711	16.8888	9.60156e-22	6.95045e-20	39.3237
CCL18	2.8992	5.70273	10.1429	1.73339e-13	1.3493e-12	20.2496
MAP3K7CL	2.85176	6.00863	15.3884	4.11766e-20	1.7986e-18	35.5604
CXCL11	2.81692	4.18251	7.50572	1.29657e-09	4.97406e-09	11.3118
CAV1	2.81199	8.95041	17.1404	5.23312e-22	4.06082e-20	39.9307
CCND1	2.77587	8.82228	16.6258	1.82357e-21	1.22127e-19	38.6819
CXCL9	2.73249	7.23407	7.68209	7.00516e-10	2.81443e-09	11.927
RASSF2	2.70178	7.02894	14.3553	6.34471e-19	1.9575e-17	32.8182
PPFIA4	2.6901	5.57662	15.2774	5.49258e-20	2.29167e-18	35.2716
PCDH17	2.68426	7.31394	16.5066	2.44468e-21	1.55052e-19	38.3886
EZH2	2.67241	4.85518	20.0155	7.85251e-25	1.65842e-22	46.4188
UHRF1	2.67118	5.28852	21.6816	2.51976e-26	8.19361e-24	49.8371
IL10RA	2.66371	7.49587	12.0676	4.29404e-16	6.26105e-15	26.2757
GZMA	2.66289	6.22906	8.57389	3.2236e-11	1.62497e-10	15.0082
GJA1	2.66153	10.1503	15.5533	2.69186e-20	1.24202e-18	35.9863
CSPG4	2.66127	5.79525	16.9497	8.28488e-22	6.14942e-20	39.4712
ZNF395	2.64765	7.65958	18.0266	6.49367e-23	7.10806e-21	42.0162
SLC6A3	2.64026	6.73679	7.71166	6.31933e-10	2.55694e-09	12.03
TGFBI	2.62242	9.80416	9.05914	6.22118e-12	3.557e-11	16.6571
KCNJ2	2.613	6.8162	11.6586	1.47695e-15	1.8438e-14	25.035
NKG7	2.61073	6.04833	9.75052	6.23676e-13	4.32373e-12	18.9644
CXCL10	2.60547	7.27285	6.8746	1.18742e-08	3.92598e-08	9.10198
FCGR1B	2.60437	6.22327	10.4685	6.0756e-14	5.23181e-13	21.3022
CTSS	2.60221	7.66759	12.4883	1.23253e-16	2.03135e-15	27.5292
ESM1	2.6022	7.14346	13.648	4.4381e-18	1.08353e-16	30.8664
CSTA	2.5872	6.47973	11.0812	8.76499e-15	9.05038e-14	23.2464
APOC1	2.57073	7.88548	11.567	1.95353e-15	2.36245e-14	24.7541
NOL3	2.56279	7.55966	16.1639	5.72447e-21	3.14605e-19	37.5368
BIRC3	2.5581	7.44167	11.818	9.10317e-16	1.21224e-14	25.521
VEGFA	2.55708	9.91907	17.6256	1.65364e-22	1.53287e-20	41.0823
SLFN13	2.54406	4.69315	16.348	3.61838e-21	2.18566e-19	37.9961
ADAMDEC1	2.5428	4.17139	8.49779	4.18118e-11	2.06598e-10	14.7476
HAVCR1	2.5295	5.82321	7.49533	1.34454e-09	5.14364e-09	11.2755
GJC1	2.52875	5.41967	17.882	9.0785e-23	9.11677e-21	41.6815
C1QC	2.5257	8.68311	11.7934	9.80699e-16	1.29366e-14	25.4462
QRFPR	2.52485	3.98997	12.8284	4.5694e-17	8.38788e-16	28.5256
RAD51AP1	2.51536	4.49914	25.3396	2.68489e-29	2.72451e-26	56.6027
FABP5	2.51158	7.53956	9.33149	2.49793e-12	1.54092e-11	17.5722
GPR65	2.51041	6.35387	10.2308	1.30447e-13	1.03699e-12	20.535
IRX3	2.50374	10.1472	11.3405	3.9181e-15	4.3718e-14	24.0551
DTL	2.48095	4.40587	19.6433	1.74668e-24	3.36503e-22	45.6227
P2RY8	2.48094	6.94331	14.9769	1.20595e-19	4.56656e-18	34.4833
MCAM	2.47925	8.36918	18.118	5.25837e-23	5.89925e-21	42.2269
PCDHB14	2.45089	5.19581	11.4989	2.40613e-15	2.8476e-14	24.5448
VWF	2.44606	7.74061	14.6978	2.52677e-19	8.81829e-18	33.7416
PDK1	2.43476	6.44999	21.8738	1.71829e-26	6.17559e-24	50.2169
RGS18	2.42722	5.43072	11.7286	1.19364e-15	1.5245e-14	25.2489
GAS2L3	2.42698	7.62131	10.66	3.30032e-14	3.00357e-13	21.9149
GZMB	2.42292	5.76617	17.6454	1.57815e-22	1.47626e-20	41.129
DPY19L2P2	2.42221	5.91747	14.5762	3.49817e-19	1.16716e-17	33.4154
CD36	2.41379	5.89495	10.5945	4.06498e-14	3.61908e-13	21.7057
RRM2	2.41031	5.62719	16.1011	6.70019e-21	3.64085e-19	37.3792
RGS1	2.40626	6.61682	12.3505	1.85041e-16	2.92497e-15	27.1211
TLR3	2.40444	7.0125	13.6163	4.85028e-18	1.16623e-16	30.7773
CD1D	2.38794	5.17606	14.1856	1.00619e-18	2.91552e-17	32.3556
SCGN	2.37312	6.70102	5.96676	2.88997e-07	7.80438e-07	5.9291
PRELID2	2.37123	6.12837	20.9778	1.04852e-25	2.98334e-23	48.4213
PYGL	2.36784	7.53258	17.0285	6.8489e-22	5.23532e-20	39.6616
BCL2A1	2.36688	4.90809	8.46859	4.6206e-11	2.26616e-10	14.6475
APBB1IP	2.36472	6.31317	15.358	4.45503e-20	1.90933e-18	35.4814
C16orf54	2.36138	5.38455	7.72593	6.01303e-10	2.43878e-09	12.0797
PLVAP	2.35702	9.32749	13.6337	4.6192e-18	1.12119e-16	30.8263
IDO1	2.3569	6.77647	9.40571	1.95077e-12	1.2304e-11	17.8202
SLC6A1	2.35205	4.94133	15.4511	3.50166e-20	1.55207e-18	35.7227
MS4A7	2.35052	7.80737	10.6278	3.6553e-14	3.29298e-13	21.8124
ITGA4	2.34415	5.26466	12.6577	7.50422e-17	1.30171e-15	28.0275
DDIT4	2.34001	10.3599	12.8991	3.72457e-17	6.95547e-16	28.7309
ITK	2.33993	5.50127	9.19025	4.0055e-12	2.36953e-11	17.0986
SLFN11	2.3388	6.42539	14.6385	2.96038e-19	1.00741e-17	33.5828
CCL5	2.3348	7.39937	7.64861	7.87262e-10	3.13405e-09	11.8103
CXCR4	2.33282	8.63704	9.96129	3.12778e-13	2.30488e-12	19.6571
RTP4	2.33228	7.04561	9.38123	2.11637e-12	1.32466e-11	17.7385
GAS6-AS1	2.332	4.72837	19.1731	4.87847e-24	8.19183e-22	44.5991
MTCP1	2.32834	4.82003	14.8911	1.51242e-19	5.55259e-18	34.2562
EOMES	2.32549	6.14711	6.98764	7.97836e-09	2.70783e-08	9.49832
LINC01094	2.32542	4.22301	14.4159	5.38527e-19	1.71234e-17	32.9827
EDN1	2.31736	7.36158	13.2496	1.36426e-17	2.91126e-16	29.7392
AHNAK2	2.31348	5.54016	14.2907	7.55856e-19	2.28048e-17	32.6426
DDB2	2.30536	7.50811	17.1818	4.73944e-22	3.74873e-20	40.0298
LYZ	2.30085	8.55248	6.3005	8.95587e-08	2.59505e-07	7.09157
IKBIP	2.30047	6.22164	20.1172	6.32484e-25	1.42385e-22	46.6341
DGCR5	2.28968	6.29736	13.6798	4.06133e-18	1.00476e-16	30.9554
TMEM91	2.27261	7.2011	13.0195	2.63287e-17	5.13197e-16	29.0791
P2RX7	2.268	5.64517	12.8998	3.7164e-17	6.94656e-16	28.7331
CLEC5A	2.26698	4.23722	13.1415	1.8566e-17	3.80343e-16	29.4299
OLFML2B	2.26519	6.59807	13.3232	1.10711e-17	2.42052e-16	29.9489
PABPC4L	2.26314	6.73622	12.0754	4.19513e-16	6.13429e-15	26.2991
C5orf46	2.2577	5.18749	8.3876	6.09911e-11	2.92751e-10	14.3695
SACS	2.2497	6.30144	15.2293	6.2242e-20	2.55018e-18	35.1463
SCG2	2.24364	4.29081	7.63196	8.34325e-10	3.30727e-09	11.7523
LINC00462	2.24082	4.93543	8.88733	1.11083e-11	6.07652e-11	16.0759
CAV2	2.23694	7.60792	19.1679	4.93554e-24	8.22028e-22	44.5875
LOC101927972	2.2342	3.9276	10.399	7.59038e-14	6.39114e-13	21.0786
CDH13	2.22786	6.53612	13.0499	2.41283e-17	4.73459e-16	29.1668
CASP1	2.22073	7.43644	12.6911	6.80846e-17	1.19621e-15	28.1252
MIR210HG	2.21173	6.13363	12.985	2.90762e-17	5.61409e-16	28.9795
PSMB8	2.20515	8.7093	13.9331	2.01166e-18	5.45838e-17	31.6605
PF4V1	2.20256	3.67346	10.7165	2.7588e-14	2.56195e-13	22.0949
PCDHB15	2.19956	5.2233	8.32451	7.57467e-11	3.58206e-10	14.1525
PCDHGA8	2.19659	5.79048	24.8393	6.50145e-29	6.05403e-26	55.7317
FPR3	2.18658	5.80706	12.6633	7.38403e-17	1.28303e-15	28.0437
CD247	2.18307	6.02672	10.2904	1.07617e-13	8.72778e-13	20.7281
IGSF6	2.17885	4.45206	14.3239	6.90776e-19	2.10994e-17	32.7329
PRKCDBP	2.17844	7.20143	17.2159	4.36753e-22	3.49505e-20	40.1115
CCL28	2.16588	6.07347	12.0179	4.98471e-16	7.14103e-15	26.1259
LOC100288152	2.16183	7.48551	6.20293	1.26199e-07	3.58771e-07	6.75099
PLOD2	2.16089	8.82186	14.7174	2.39835e-19	8.39874e-18	33.7939
BTN3A2	2.15778	7.98848	11.8155	9.17284e-16	1.21864e-14	25.5134
IFI16	2.15433	8.44896	14.2434	8.59595e-19	2.53822e-17	32.5136
CHSY3	2.15167	4.66949	19.1599	5.02341e-24	8.29916e-22	44.57
LGALS1	2.14562	10.6896	14.897	1.48889e-19	5.47601e-18	34.272
ERV3-2	2.14293	7.57785	9.07688	5.8607e-12	3.36027e-11	16.7169
NLGN1	2.14283	5.96888	8.47378	4.53927e-11	2.23162e-10	14.6653
HCLS1	2.14159	8.16298	10.1622	1.62836e-13	1.27323e-12	20.3123
HLA-DQB1	2.13883	6.71578	6.77983	1.65746e-08	5.36155e-08	8.76973
PAG1	2.13381	6.68213	14.7985	1.93304e-19	6.93312e-18	34.0102
TYROBP	2.12944	8.86489	10.6282	3.65144e-14	3.29095e-13	21.8134
C10orf10	2.1248	8.42766	11.6346	1.58889e-15	1.96796e-14	24.9616
FLT1	2.12429	7.09274	18.3042	3.43097e-23	4.11266e-21	42.6532
SPINK13	2.12261	4.68038	8.74459	1.80233e-11	9.49896e-11	15.5908
GPR4	2.12076	6.56031	19.945	9.12964e-25	1.90847e-22	46.2687
VIM	2.11749	9.23597	12.7774	5.29779e-17	9.58749e-16	28.3771
ENTPD1	2.11742	6.3457	17.161	4.98176e-22	3.89528e-20	39.9799
LY96	2.11094	6.86855	9.89445	3.89075e-13	2.80475e-12	19.438
IFI44L	2.10699	8.08091	9.99085	2.8405e-13	2.10835e-12	19.7538
FAM49A	2.10671	5.00658	18.0939	5.55862e-23	6.1888e-21	42.1714
PSMB9	2.10305	8.54178	10.7754	2.29e-14	2.15891e-13	22.2819
CD86	2.10238	5.48156	13.4043	8.80139e-18	1.97055e-16	30.1792
MICB	2.0971	5.65509	13.1978	1.58119e-17	3.2919e-16	29.5911
CRTAM	2.0951	4.2426	7.85989	3.77335e-10	1.58144e-09	12.5456
TRIM59	2.09426	4.6467	16.1991	5.24332e-21	2.93483e-19	37.6247
PROCR	2.08684	7.15738	16.0234	8.14522e-21	4.30059e-19	37.1837
COL4A1	2.08562	9.90621	14.7264	2.3414e-19	8.22743e-18	33.818
SAMHD1	2.0853	6.9596	13.8948	2.23558e-18	6.01024e-17	31.5546
TLR7	2.08526	5.69262	12.2428	2.54649e-16	3.90183e-15	26.8005
COL15A1	2.08317	8.81799	9.19461	3.94739e-12	2.33853e-11	17.1133
APOBEC3C	2.07945	6.52874	18.5717	1.86825e-23	2.39206e-21	43.2599
TNFSF13B	2.07503	7.25147	9.11568	5.14404e-12	2.98191e-11	16.8477
EBF2	2.07428	4.38351	13.2379	1.41037e-17	2.98719e-16	29.7058
FAM57A	2.07262	6.97331	15.1003	8.71846e-20	3.448e-18	34.8085
TIMP1	2.07004	10.6201	10.7843	2.22613e-14	2.10547e-13	22.3104
TIMD4	2.06654	4.62022	9.03709	6.70051e-12	3.80556e-11	16.5827
RAPGEF4	2.06249	6.38323	12.1156	3.72004e-16	5.51838e-15	26.4198
HLA-DMA	2.05734	9.25384	11.2728	4.83071e-15	5.28361e-14	23.8448
SPARCL1	2.05593	10.8551	12.6072	8.69905e-17	1.48137e-15	27.8791
CD2	2.04604	6.83098	6.99913	7.66257e-09	2.60887e-08	9.53858
OLFML2A	2.0446	8.13081	11.3548	3.74878e-15	4.22196e-14	24.0994
HLA-DQA1	2.04355	7.40285	3.23462	0.00221619	0.003576	-2.78319
NLRC5	2.04102	7.30454	12.0705	4.2576e-16	6.21233e-15	26.2842
GBP2	2.03933	7.50437	9.14154	4.71621e-12	2.75417e-11	16.9348
PDGFD	2.03924	7.29678	13.3027	1.17312e-17	2.5324e-16	29.8907
CALCRL	2.03768	6.48809	13.5399	6.00799e-18	1.40663e-16	30.5624
FCER1G	2.03364	7.48721	9.49423	1.45378e-12	9.40094e-12	18.1152
RGS5	2.03334	8.44415	18.7009	1.3962e-23	1.88174e-21	43.5505
TOX2	2.0325	5.05656	9.02687	6.93507e-12	3.93115e-11	16.5482
GIMAP2	2.02836	7.41494	10.4066	7.40818e-14	6.26605e-13	21.103
HEY1	2.02518	7.62088	10.7546	2.44518e-14	2.29359e-13	22.2161
TOP2A	2.02411	3.92395	22.8436	2.595e-27	1.32903e-24	52.0901
PGF	2.02028	8.42198	13.3539	1.01478e-17	2.22816e-16	30.0363
S1PR1	2.01921	7.59379	19.62	1.83718e-24	3.48485e-22	45.5723
ALDOC	2.01784	7.94215	12.1949	2.9364e-16	4.44605e-15	26.6574
TM6SF1	2.01654	6.10413	12.1604	3.25468e-16	4.8775e-15	26.554
FUT11	2.01369	6.91627	16.347	3.62747e-21	2.18566e-19	37.9936
SH2B3	2.00605	7.86115	17.8996	8.71587e-23	8.94926e-21	41.7222
LOC101928173	2.00504	4.31222	22.1889	9.22804e-27	3.5669e-24	50.8334
GZMK	2.00098	6.94167	5.24239	3.57661e-06	8.38239e-06	3.44334
CD300LF	2.00024	5.64913	14.1177	1.21115e-18	3.45085e-17	32.1696
HAPLN1	1.99905	4.42555	9.31898	2.60442e-12	1.59975e-11	17.5304
C1orf162	1.99223	7.62974	9.79678	5.35767e-13	3.76655e-12	19.1169
SOX11	1.9909	4.38721	8.79503	1.51862e-11	8.11648e-11	15.7624
CLEC14A	1.99041	7.31329	15.4954	3.12437e-20	1.40586e-18	35.837
GBP5	1.98905	5.48221	8.13425	1.45894e-10	6.56431e-10	13.4963
CSF2RB	1.98654	6.62671	9.32735	2.53269e-12	1.55857e-11	17.5584
SLC43A3	1.98271	6.54555	18.1412	4.98529e-23	5.70551e-21	42.2801
RAB37	1.98227	4.72245	11.8188	9.08092e-16	1.21036e-14	25.5235
MEF2C	1.98172	7.45345	15.9399	1.0053e-20	5.17454e-19	36.9729
PPP1R3C	1.98122	6.32019	11.3511	3.79186e-15	4.26111e-14	24.088
LAPTM5	1.98015	9.09759	10.1269	1.82523e-13	1.41474e-12	20.1978
RGCC	1.97882	6.87646	12.7406	5.89493e-17	1.05378e-15	28.2698
OR51E1	1.97843	4.99796	13.7658	3.19652e-18	8.21629e-17	31.1958
PBK	1.97141	4.2578	16.5097	2.4256e-21	1.548e-19	38.3964
CORO1A	1.97137	6.90751	8.07041	1.81903e-10	8.04679e-10	13.2756
C3orf70	1.97123	5.27738	14.514	4.1346e-19	1.34234e-17	33.2477
CENPK	1.96918	3.9437	14.2155	9.27375e-19	2.71016e-17	32.4374
GAL3ST1	1.96735	8.27411	6.84256	1.32911e-08	4.35858e-08	8.98966
RSPH9	1.96587	4.40952	17.9857	7.13693e-23	7.73583e-21	41.9218
STC2	1.96278	6.72554	10.2296	1.30943e-13	1.04013e-12	20.5312
HLA-G	1.95954	10.6766	14.9678	1.23506e-19	4.65099e-18	34.4594
ELTD1	1.954	8.61087	13.4677	7.35948e-18	1.67704e-16	30.3588
CCDC102B	1.95001	5.63499	11.4821	2.53407e-15	2.98522e-14	24.4928
HLA-F	1.94774	9.5312	12.524	1.10997e-16	1.85321e-15	27.6344
HIST1H2BK	1.94766	8.80578	9.15209	4.55225e-12	2.66602e-11	16.9703
MYC	1.94701	8.9853	8.38488	6.15638e-11	2.95017e-10	14.3601
ARRDC2	1.94576	7.6708	16.759	1.31671e-21	9.0822e-20	39.0078
TYMP	1.94528	6.02287	11.8118	9.2757e-16	1.23151e-14	25.5022
CKAP2L	1.94211	4.29932	41.3992	5.2581e-39	1.07717e-34	78.134
RNASET2	1.93836	6.91291	11.1491	7.09242e-15	7.46252e-14	23.4591
ANXA4	1.93752	11.6166	22.986	1.97728e-27	1.03863e-24	52.3592
CLEC2B	1.93708	6.46444	10.7411	2.55226e-14	2.38856e-13	22.1731
CD69	1.93483	6.33857	6.36589	7.11583e-08	2.09116e-07	7.32008
CLIC2	1.93259	6.419	15.1408	7.84191e-20	3.13157e-18	34.9147
LOC285812	1.92946	6.53037	11.7913	9.8684e-16	1.29842e-14	25.44
PRC1	1.9263	5.50364	16.7405	1.37731e-21	9.46834e-20	38.9627
LILRB2	1.92389	5.62309	12.4781	1.27029e-16	2.08853e-15	27.4989
HLA-DPA1	1.92007	10.0708	9.9781	2.96098e-13	2.19063e-12	19.7121
CDH5	1.91877	7.53834	16.0931	6.83678e-21	3.68574e-19	37.359
BTN3A3	1.90896	7.37048	10.3432	9.081e-14	7.48324e-13	20.8986
TCF4	1.90809	8.15218	13.5377	6.04492e-18	1.41044e-16	30.5563
FILIP1	1.90796	5.00294	13.3161	1.12937e-17	2.46132e-16	29.9289
MNDA	1.90788	7.27177	8.40585	5.72904e-11	2.76283e-10	14.4322
TLR2	1.90691	7.73162	10.4945	5.59099e-14	4.8615e-13	21.3856
MTCL1	1.90333	7.55268	10.4781	5.89286e-14	5.09157e-13	21.3328
HMCN1	1.9012	6.56384	10.4257	6.96922e-14	5.93151e-13	21.1644
ID3	1.89872	9.27134	10.669	3.20717e-14	2.92659e-13	21.9437
HLA-DRA	1.89632	11.5229	11.4168	3.09701e-15	3.56836e-14	24.2913
IL7	1.89273	5.99291	7.84053	4.03592e-10	1.68219e-09	12.4783
PYCARD	1.88667	7.14434	10.4341	6.7837e-14	5.79529e-13	21.1915
GPR34	1.88188	7.45376	8.3126	7.89135e-11	3.7121e-10	14.1115
LILRA6	1.88153	5.26813	22.7218	3.27815e-27	1.56177e-24	51.8587
CLEC4A	1.88005	5.58944	11.2418	5.31696e-15	5.76008e-14	23.7485
MLKL	1.87936	7.32205	15.4956	3.12218e-20	1.40586e-18	35.8377
CENPH	1.8781	4.69115	22.4539	5.5017e-27	2.30016e-24	51.3459
RNASE6	1.87515	7.95413	9.08181	5.76439e-12	3.31061e-11	16.7336
PTHLH	1.87447	3.61251	4.73626	1.99291e-05	4.24837e-05	1.75714
TM4SF18	1.87384	8.46336	14.5975	3.30391e-19	1.10414e-17	33.4727
COL1A2	1.87341	8.75311	7.91519	3.11426e-10	1.32686e-09	12.7376
C1QA	1.87313	8.82947	9.30189	2.75724e-12	1.68662e-11	17.4732
NFE2L3	1.86512	5.0909	10.3263	9.5892e-14	7.84835e-13	20.8439
SLC17A4	1.86265	4.84456	6.08527	1.90749e-07	5.28279e-07	6.34105
CD52	1.86264	6.99102	7.79789	4.68083e-10	1.93135e-09	12.3301
LOC101929705	1.86246	4.77792	13.2461	1.37789e-17	2.93227e-16	29.7292
LY86	1.86175	7.1888	10.4966	5.55406e-14	4.8335e-13	21.3923
PNMA2	1.85958	5.98689	11.0474	9.74071e-15	9.96246e-14	23.1404
SPARC	1.85879	10.89	16.9678	7.93007e-22	5.92903e-20	39.515
NRG3	1.85645	4.66916	16.0951	6.80234e-21	3.67685e-19	37.3641
PSMB10	1.85459	7.55652	11.1551	6.96156e-15	7.35126e-14	23.4778
RCN1	1.85404	8.75947	16.7708	1.27918e-21	8.88315e-20	39.0367
CDCA7L	1.85289	6.72024	9.91902	3.59058e-13	2.60839e-12	19.5186
LIPA	1.8488	10.4603	13.4943	6.82847e-18	1.57178e-16	30.4339
KCNE3	1.84388	7.21965	9.89033	3.94358e-13	2.83965e-12	19.4245
RAB42	1.84226	6.89997	7.2756	2.90216e-09	1.05433e-08	10.5072
CD93	1.84161	8.80084	15.65	2.10055e-20	1.00542e-18	36.2348
DUSP4	1.83746	5.46248	10.3349	9.32642e-14	7.66698e-13	20.8718
MPEG1	1.83571	7.84804	8.47157	4.57376e-11	2.24588e-10	14.6578
TLR8	1.83299	5.01475	11.7881	9.96386e-16	1.3093e-14	25.4303
GMFG	1.83064	7.78893	13.0815	2.20416e-17	4.40101e-16	29.2576
UBASH3A	1.82837	4.2133	8.62521	2.70574e-11	1.38401e-10	15.1837
NOG	1.82565	4.20526	6.65229	2.59675e-08	8.1653e-08	8.32269
CCL20	1.82541	6.55123	5.33608	2.59114e-06	6.18096e-06	3.76086
HSPA6	1.82275	6.54541	10.6328	3.59821e-14	3.253e-13	21.8282
GPR183	1.82126	6.68941	7.17835	4.08234e-09	1.44565e-08	10.1666
PREX1	1.82102	7.39785	17.6515	1.55573e-22	1.46869e-20	41.1433
COL4A2	1.82085	9.62137	13.3711	9.66537e-18	2.13597e-16	30.0852
TRIM22	1.81984	9.54163	12.7934	5.0571e-17	9.16811e-16	28.4238
VCAM1	1.81833	10.9992	7.92202	3.04133e-10	1.29937e-09	12.7613
TAP1	1.81373	8.26067	10.8116	2.0425e-14	1.95071e-13	22.3968
NDC80	1.81277	4.8416	15.4505	3.50779e-20	1.55207e-18	35.721
HCP5	1.81061	7.10094	10.1556	1.66346e-13	1.29919e-12	20.2909
2016-03-01	1.81031	4.93693	12.5968	8.967e-17	1.52573e-15	27.8486
CD163	1.80655	7.10707	9.39992	1.98875e-12	1.25127e-11	17.8009
PMEPA1	1.80125	7.75298	14.2347	8.80068e-19	2.58667e-17	32.4899
ZNF792	1.79865	4.55133	25.4652	2.15547e-29	2.45316e-26	56.8189
C6orf223	1.797	6.30698	14.2844	7.68829e-19	2.30942e-17	32.6255
HPCAL1	1.79695	9.19595	10.2204	1.34909e-13	1.06997e-12	20.5012
MIR34A	1.79666	6.33552	18.7917	1.13866e-23	1.60873e-21	43.7539
NUF2	1.7959	3.53663	20.1046	6.49635e-25	1.43679e-22	46.6075
CD97	1.79568	7.7529	10.4126	7.26808e-14	6.15773e-13	21.1222
TEX11	1.79454	4.59426	8.02761	2.10935e-10	9.25314e-10	13.1274
KIAA0226L	1.79331	5.19105	10.3513	8.84686e-14	7.30499e-13	20.9248
CD3D	1.79255	6.79997	7.30086	2.65625e-09	9.70328e-09	10.5955
GAPT	1.79118	4.17502	9.70969	7.13341e-13	4.89564e-12	18.8296
FGFBP2	1.78795	4.21501	11.8739	7.68807e-16	1.04511e-14	25.6907
HIGD1B	1.78696	6.39404	10.2262	1.32382e-13	1.05115e-12	20.5202
TUBB6	1.78066	8.23666	11.3488	3.81866e-15	4.27715e-14	24.0809
IL7R	1.77953	7.13692	5.79896	5.19718e-07	1.35337e-06	5.34783
HHEX	1.77717	5.90727	11.9024	7.05335e-16	9.65231e-15	25.7773
LDLRAD3	1.774	6.72495	11.1707	6.63131e-15	7.05343e-14	23.5266
BAZ1A	1.77157	7.17853	13.7593	3.25474e-18	8.32418e-17	31.1776
LAX1	1.77001	5.05348	12.474	1.28572e-16	2.11221e-15	27.4868
RHBDF2	1.76975	6.59571	15.8139	1.38352e-20	6.96381e-19	36.6531
CRIP1	1.76906	7.97727	11.047	9.75215e-15	9.96421e-14	23.1392
LINC00240	1.76719	4.29845	10.4331	6.80572e-14	5.81167e-13	21.1882
FNDC3B	1.762	4.20788	20.2396	4.88074e-25	1.12345e-22	46.892
CPA3	1.76146	7.02761	4.82975	1.45601e-05	3.16139e-05	2.06444
NUSAP1	1.76082	6.00213	11.9853	5.4961e-16	7.77576e-15	26.0278
HLA-DPB1	1.76041	8.31086	8.90475	1.04726e-11	5.75486e-11	16.135
COL6A3	1.7597	8.28082	6.58919	3.24279e-08	1.00532e-07	8.10158
RAC2	1.75917	6.82409	8.76445	1.68475e-11	8.93447e-11	15.6584
CMPK2	1.75554	6.93955	10.9819	1.19567e-14	1.19778e-13	22.9346
TRBC1	1.75486	7.46144	5.42747	1.89016e-06	4.59225e-06	4.0719
TBXAS1	1.75099	5.3391	20.7688	1.61337e-25	4.34887e-23	47.993
LOC221272	1.75083	4.8735	13.2818	1.24502e-17	2.67352e-16	29.831
RIMKLA	1.75021	4.66083	15.0856	9.06179e-20	3.55632e-18	34.7698
GNLY	1.74851	5.04131	10.1632	1.62294e-13	1.27044e-12	20.3157
FHL1	1.74467	8.58061	9.22497	3.56578e-12	2.13156e-11	17.2152
ADORA2B	1.74445	4.35896	14.5235	4.03027e-19	1.31767e-17	33.2734
THEMIS2	1.74381	6.69274	10.928	1.41598e-14	1.39729e-13	22.7647
SRGN	1.7422	8.91254	11.3808	3.46045e-15	3.92746e-14	24.1798
IRF2	1.74183	6.68585	17.8228	1.04205e-22	1.01654e-20	41.5438
RBP7	1.74132	8.19665	6.14834	1.52868e-07	4.29994e-07	6.5607
TNFAIP3	1.74073	8.07963	9.3032	2.74524e-12	1.67978e-11	17.4775
MGC70870	1.73462	5.76847	18.7852	1.15559e-23	1.62146e-21	43.7392
KCNE4	1.73395	5.30734	12.362	1.7886e-16	2.83382e-15	27.1552
LINC01426	1.73148	3.4921	7.11033	5.18373e-09	1.80694e-08	9.92834
LAMP3	1.73084	5.27132	7.50667	1.29226e-09	4.96115e-09	11.3151
IFI27	1.72792	8.82945	10.08	2.12557e-13	1.62237e-12	20.0448
LOC154761	1.72746	6.51013	14.4166	5.37547e-19	1.71234e-17	32.9845
EDNRA	1.72607	6.3532	9.98168	2.9266e-13	2.16833e-12	19.7238
PLAC8	1.72518	5.75798	7.56722	1.04587e-09	4.08032e-09	11.5264
GPR64	1.72301	4.72985	5.72387	6.75369e-07	1.73335e-06	5.0886
HSPG2	1.72023	7.89421	15.2706	5.58977e-20	2.32748e-18	35.254
PNCK	1.71956	6.49649	6.03701	2.25932e-07	6.19189e-07	6.17316
MTFP1	1.71617	8.12658	12.3368	1.92713e-16	3.0392e-15	27.0803
GGTA1P	1.71537	7.90781	10.4434	6.58518e-14	5.64008e-13	21.2213
TLR1	1.71291	6.2545	9.3283	2.52464e-12	1.55502e-11	17.5616
BHLHE41	1.71038	5.25558	13.5503	5.83476e-18	1.3692e-16	30.5918
BDNF	1.70956	4.59638	9.60056	1.02237e-12	6.79345e-12	18.4685
HLA-B	1.70726	12.2421	14.3035	7.30095e-19	2.20926e-17	32.6774
FOXF1	1.70617	5.99434	10.7527	2.45998e-14	2.30536e-13	22.21
TMEM154	1.70151	4.44985	14.8596	1.64378e-19	6.00258e-18	34.1727
CPE	1.70015	8.94679	8.79176	1.53558e-11	8.19856e-11	15.7513
LOC100507535	1.69952	5.94555	16.576	2.06064e-21	1.34441e-19	38.5596
TMSB10	1.69837	12.3517	16.188	5.39032e-21	3.00071e-19	37.5971
RASD2	1.69694	5.06463	20.2034	5.26859e-25	1.19925e-22	46.8159
ITGB2	1.69337	6.78546	10.6881	3.01847e-14	2.77293e-13	22.0046
IL32	1.68989	9.28273	8.07671	1.7798e-10	7.89029e-10	13.2974
GPAT2	1.68556	5.62449	10.8373	1.88321e-14	1.80954e-13	22.4783
HSPB8	1.68442	8.09307	9.902	3.79596e-13	2.74493e-12	19.4628
H2BFS	1.68439	7.34443	10.4895	5.68194e-14	4.93431e-13	21.3694
DUXAP10	1.68373	4.04288	8.5408	3.60925e-11	1.80076e-10	14.895
GIMAP7	1.6834	7.85825	11.1657	6.73494e-15	7.13771e-14	23.511
KIAA0101	1.68232	5.82284	15.2066	6.60359e-20	2.68415e-18	35.087
KIAA1462	1.68201	6.40281	13.8882	2.27688e-18	6.08137e-17	31.5362
JAZF1	1.68182	6.09575	19.2781	3.87199e-24	6.72217e-22	44.8295
PRIMA1	1.67669	5.99971	4.71856	2.11457e-05	4.48623e-05	1.69918
ERO1L	1.67566	7.63441	15.4785	3.26344e-20	1.45337e-18	35.7933
PIK3CG	1.67521	4.68501	12.4462	1.39508e-16	2.27076e-15	27.4048
KIF11	1.67476	4.21971	14.2205	9.14917e-19	2.67757e-17	32.451
GNA15	1.67364	5.67979	12.6175	8.44049e-17	1.44696e-15	27.9094
LINC01315	1.67327	6.66574	15.8915	1.13622e-20	5.77585e-19	36.8503
FSCN1	1.67265	5.73935	15.4545	3.47157e-20	1.5427e-18	35.7314
PECAM1	1.67036	8.18079	17.6139	1.69944e-22	1.56823e-20	41.055
SASH3	1.66819	6.05916	8.90816	1.03526e-11	5.69642e-11	16.1465
NRARP	1.66669	7.71505	12.4578	1.34818e-16	2.20246e-15	27.4391
SFRP2	1.6644	6.03813	3.52672	0.000942281	0.00160129	-1.97273
APOBEC3B	1.66287	5.22486	7.51251	1.26618e-09	4.87024e-09	11.3355
GZMH	1.66112	5.72392	9.65823	8.45143e-13	5.71218e-12	18.6595
HK1	1.65905	8.75881	13.4966	6.78542e-18	1.56362e-16	30.4403
VAV1	1.65817	5.64921	11.0588	9.39993e-15	9.65643e-14	23.1762
PCDHB16	1.65697	5.69555	6.71908	2.05264e-08	6.54694e-08	8.55677
EDNRB	1.65483	8.73074	7.56712	1.04622e-09	4.08091e-09	11.5261
NINJ2	1.65385	5.0015	16.3443	3.65174e-21	2.18741e-19	37.9869
HLA-DMB	1.6533	9.34991	9.92793	3.48756e-13	2.54166e-12	19.5478
MYO3A	1.65319	3.7985	18.8331	1.038e-23	1.48703e-21	43.8462
BTN3A1	1.65307	7.43692	11.7495	1.12032e-15	1.44436e-14	25.3125
HCG4	1.6526	5.19471	8.51249	3.97603e-11	1.96889e-10	14.798
GLIPR1	1.65209	6.50606	8.36228	6.65296e-11	3.17107e-10	14.2825
MARCKS	1.64896	8.32284	12.1715	3.14871e-16	4.73254e-15	26.5873
FAM198B	1.64638	7.02982	12.3623	1.78733e-16	2.83382e-15	27.156
THEMIS	1.64624	3.89656	6.46107	5.09062e-08	1.52958e-07	7.65301
PGBD5	1.64329	6.24653	9.12853	4.92686e-12	2.86656e-11	16.891
NLRC3	1.64313	5.76426	7.87342	3.60019e-10	1.51414e-09	12.5926
CXCL13	1.64301	3.84495	4.22271	0.000107941	0.000208257	0.111274
FAM129A	1.64186	7.33298	10.8151	2.02008e-14	1.9311e-13	22.4079
COL5A2	1.64126	7.22696	10.4041	7.46722e-14	6.30298e-13	21.0951
KDR	1.63953	9.06761	11.6751	1.40445e-15	1.76081e-14	25.0855
LOC100291323	1.63757	5.69414	10.6667	3.23092e-14	2.94564e-13	21.9363
HLA-DPB2	1.63654	3.75221	6.68426	2.32033e-08	7.34688e-08	8.43472
CCR5	1.6361	7.38772	6.94137	9.38818e-09	3.15858e-08	9.3361
ABCA17P	1.63454	4.86165	7.78495	4.89636e-10	2.01408e-09	12.2851
ANO1	1.63443	5.81601	10.5475	4.72112e-14	4.17063e-13	21.5554
AIM2	1.6341	4.95762	7.48559	1.3911e-09	5.30491e-09	11.2415
XAF1	1.63157	7.30062	11.0599	9.36753e-15	9.63369e-14	23.1797
DOC2A	1.63068	5.99824	7.48101	1.41358e-09	5.38566e-09	11.2254
BIRC7	1.6259	6.28745	10.1646	1.61547e-13	1.26508e-12	20.3203
LDHA	1.62464	12.6002	16.4731	2.65502e-21	1.65825e-19	38.306
FZD1	1.62409	6.53691	11.4613	2.70129e-15	3.16402e-14	24.4286
GJA4	1.62094	7.45331	10.9881	1.17252e-14	1.17688e-13	22.9542
ABCG1	1.6202	6.57797	10.9074	1.51028e-14	1.47966e-13	22.7
PDLIM1	1.6171	10.1038	13.7426	3.40978e-18	8.65586e-17	31.1309
MPZL2	1.61691	6.57513	13.3911	9.13465e-18	2.02964e-16	30.1419
SLC35G2	1.61684	5.55533	19.8386	1.14672e-24	2.30311e-22	46.0418
LINGO1	1.6161	6.19196	14.7805	2.02765e-19	7.22407e-18	33.9623
WDR54	1.61593	8.63414	13.8245	2.71577e-18	7.13273e-17	31.3593
IER5	1.61576	8.10749	12.0969	3.9338e-16	5.78935e-15	26.3637
KCNK3	1.61571	6.29204	8.37615	6.34359e-11	3.03137e-10	14.3301
PDGFRB	1.60949	8.02338	11.4903	2.47063e-15	2.91552e-14	24.5182
RSAD2	1.60923	5.99401	9.20239	3.84586e-12	2.28168e-11	17.1394
PSORS1C3	1.60833	4.83397	4.58992	3.24571e-05	6.70886e-05	1.28052
LRP4	1.60811	5.71457	9.55644	1.18298e-12	7.77994e-12	18.3221
TRIM9	1.60676	4.34685	10.9506	1.31878e-14	1.30704e-13	22.8361
HCK	1.60669	6.68294	9.38522	2.08844e-12	1.30797e-11	17.7518
FAP	1.60468	5.07809	10.6594	3.30629e-14	3.00766e-13	21.9131
EHD2	1.60272	7.64071	19.017	6.89182e-24	1.03813e-21	44.2547
S100A8	1.6015	6.18115	6.72526	2.00844e-08	6.41887e-08	8.57845
NCAPG	1.59959	3.64017	19.0259	6.7565e-24	1.03294e-21	44.2744
ELMO1	1.59958	5.69503	13.0968	2.10967e-17	4.24546e-16	29.3016
ALPK2	1.59831	9.23911	4.90514	1.12902e-05	2.49075e-05	2.31373
CSF2RA	1.59827	5.14673	12.2551	2.45488e-16	3.77558e-15	26.8373
SLITRK5	1.59807	3.69507	6.92208	1.00474e-08	3.36272e-08	9.26846
PCED1B	1.59709	5.94322	9.86499	4.28452e-13	3.07327e-12	19.3412
RNF166	1.59401	6.3177	12.4656	1.31791e-16	2.15644e-15	27.4619
EMP3	1.59308	8.11424	16.5082	2.43502e-21	1.54919e-19	38.3925
GBP1	1.58955	7.5739	7.14924	4.52162e-09	1.59185e-08	10.0647
S100A9	1.58341	7.17879	7.49549	1.34377e-09	5.14167e-09	11.276
FLJ32255	1.58082	4.92209	9.99137	2.83563e-13	2.10626e-12	19.7555
CEBPD	1.58013	8.89602	11.9395	6.30793e-16	8.75503e-15	25.8894
CD14	1.57911	9.08399	8.94116	9.26015e-12	5.14241e-11	16.2583
FAM101B	1.5779	8.45083	11.679	1.38811e-15	1.74352e-14	25.0973
PCDHB4	1.57756	4.81222	7.47417	1.44781e-09	5.50683e-09	11.2016
INPP5D	1.576	5.7308	14.1346	1.15656e-18	3.31376e-17	32.2158
LOC100127972	1.57391	4.54732	10.6167	3.78759e-14	3.40318e-13	21.7767
ADA	1.57319	5.89542	13.879	2.3358e-18	6.22251e-17	31.5106
ZNF611	1.57278	6.37815	24.8027	6.94088e-29	6.18221e-26	55.6672
ANLN	1.57159	3.81731	12.09	4.01611e-16	5.88934e-15	26.3429
DOCK10	1.56928	5.16128	11.4489	2.80606e-15	3.27549e-14	24.3904
SPINK5	1.56894	5.09515	10.4159	7.1912e-14	6.10269e-13	21.1329
MS4A6A	1.5669	7.21804	9.90239	3.79115e-13	2.74243e-12	19.464
RAB31	1.56565	8.66455	12.2358	2.59988e-16	3.97471e-15	26.7796
KRBA1	1.56482	7.44955	10.4586	6.2715e-14	5.38692e-13	21.2703
ZNF320	1.56477	7.55632	10.2429	1.25458e-13	1.00122e-12	20.5741
TNFAIP8	1.56339	6.83437	10.0386	2.43185e-13	1.83366e-12	19.9097
SCARB1	1.56241	5.49962	9.16136	4.41282e-12	2.59047e-11	17.0015
NCKAP1L	1.56219	6.31934	10.4796	5.86315e-14	5.07232e-13	21.3379
CLEC2D	1.56027	4.12102	11.7793	1.02354e-15	1.33897e-14	25.4033
APOL1	1.55718	7.61721	6.41417	6.00417e-08	1.78289e-07	7.48891
CENPU	1.55519	5.02782	17.0088	7.18349e-22	5.41033e-20	39.6139
TNFSF9	1.55309	4.69241	9.95316	3.21183e-13	2.35918e-12	19.6305
DCLK1	1.55197	4.59384	9.0261	6.9531e-12	3.94029e-11	16.5456
GNB4	1.55135	6.57504	17.9798	7.23535e-23	7.80123e-21	41.9082
MELK	1.55106	5.75942	18.5266	2.06881e-23	2.56858e-21	43.1581
GIMAP6	1.55012	8.22957	12.7435	5.84593e-17	1.04594e-15	28.2782
NRTN	1.54946	4.34057	9.89996	3.82129e-13	2.75936e-12	19.4561
EVI2A	1.5491	7.14075	6.30093	8.9423e-08	2.59148e-07	7.09308
PCDHB11	1.54904	5.65059	18.4277	2.58916e-23	3.15723e-21	42.9342
UCN	1.54887	5.15649	17.9024	8.65862e-23	8.94926e-21	41.7288
P2RY12	1.54874	3.93588	7.96883	2.58561e-10	1.11796e-09	12.9237
GRIK3	1.54864	3.72685	16.2488	4.63124e-21	2.65015e-19	37.749
SLC15A3	1.54846	7.00483	12.8558	4.22047e-17	7.78924e-16	28.6054
FAM26F	1.54812	5.48211	8.37729	6.31884e-11	3.02236e-10	14.3341
DPYSL2	1.54428	10.7045	15.6959	1.86811e-20	9.00475e-19	36.3523
TRIM55	1.54316	6.18904	8.31271	7.88829e-11	3.71152e-10	14.1119
TMEM133	1.54155	7.63669	11.6056	1.73613e-15	2.12972e-14	24.8726
RASSF6	1.54087	6.71925	11.7969	9.70315e-16	1.28079e-14	25.4569
PRUNE2	1.53996	7.72526	6.35619	7.36287e-08	2.15757e-07	7.28616
MS4A4A	1.53889	7.23508	8.17664	1.26036e-10	5.74412e-10	13.6428
SLC27A3	1.53729	6.92755	13.7795	3.0776e-18	7.95052e-17	31.2338
DNMT1	1.53568	7.94578	16.3363	3.72497e-21	2.22477e-19	37.967
IGSF21	1.53495	5.13713	15.9554	9.66715e-21	5.0137e-19	37.0121
ADORA3	1.53407	5.1543	10.4507	6.43224e-14	5.52036e-13	21.2449
CD200	1.53392	7.3206	13.3988	8.93952e-18	1.99711e-16	30.1635
BCL11A	1.53209	5.25271	9.83233	4.76821e-13	3.37648e-12	19.2339
BMP2	1.53091	6.95484	10.8724	1.68631e-14	1.63491e-13	22.5893
PTPRC	1.52929	5.83063	8.47095	4.58346e-11	2.24969e-10	14.6556
SLA	1.52926	7.5083	10.3592	8.62452e-14	7.15022e-13	20.9504
CD8A	1.52887	6.86387	4.59355	3.20684e-05	6.63322e-05	1.29228
CDK18	1.52883	7.47854	8.35012	6.93673e-11	3.29865e-10	14.2406
CCR6	1.52593	4.23134	7.54649	1.12442e-09	4.36268e-09	11.4541
IGBP1	1.52337	9.05792	22.3779	6.37773e-27	2.61309e-24	51.1995
CD300A	1.52062	5.25375	14.8355	1.75224e-19	6.35333e-18	34.1087
KIAA1551	1.51723	7.24517	12.3962	1.61706e-16	2.5921e-15	27.2565
FXYD5	1.51257	7.63674	9.30764	2.70486e-12	1.65705e-11	17.4924
EMR2	1.51248	4.79633	13.8576	2.4783e-18	6.54257e-17	31.4511
TRAC	1.51184	7.13258	6.07489	1.97825e-07	5.46545e-07	6.30492
GPR18	1.51176	4.01729	7.00474	7.51294e-09	2.56005e-08	9.55824
PPAP2A	1.51029	10.6091	11.8612	7.98806e-16	1.07802e-14	25.6523
CHSY1	1.50865	9.38169	10.8541	1.78661e-14	1.72076e-13	22.5312
COL8A1	1.50815	4.70298	12.0276	4.84113e-16	6.95967e-15	26.1552
PRSS16	1.50803	4.95302	6.24809	1.07677e-07	3.08427e-07	6.90858
C4orf47	1.50729	6.24986	10.4832	5.79766e-14	5.01778e-13	21.3492
HRH1	1.50712	5.43492	12.4658	1.31717e-16	2.15644e-15	27.4625
CREG2	1.50704	3.4893	7.58706	9.75872e-10	3.8291e-09	11.5957
BUB1B	1.50491	5.07256	19.0118	6.97149e-24	1.04247e-21	44.2432
FAM110C	1.50421	9.44338	7.61372	8.89166e-10	3.5104e-09	11.6887
POLE2	1.50382	5.166	15.3622	4.40646e-20	1.89706e-18	35.4924
HLA-J	1.50209	10.5553	10.8901	1.59495e-14	1.55666e-13	22.6452
MSR1	1.502	4.68129	12.7533	5.68116e-17	1.02092e-15	28.3069
UBE2C	1.50134	5.46282	16.0064	8.50215e-21	4.46603e-19	37.1407
SPIRE1	1.50131	7.08959	12.8943	3.77677e-17	7.03372e-16	28.7169
ASAP1-IT1	1.50058	6.11505	12.4696	1.3025e-16	2.13806e-15	27.4737
ALOX5	1.49966	5.90334	11.8021	9.55267e-16	1.265e-14	25.4726
COL5A3	1.49788	6.15367	12.9296	3.41093e-17	6.46405e-16	28.8192
GP6	1.49393	4.02891	14.9683	1.23362e-19	4.65099e-18	34.4605
PITRM1-AS1	1.48313	4.17114	19.3814	3.0882e-24	5.64866e-22	45.0549
THBS2	1.48298	7.96859	4.27893	9.00062e-05	0.000175724	0.287566
SYNM	1.47966	7.85973	12.0355	4.7281e-16	6.83074e-15	26.179
RPA4	1.47887	4.16677	14.9117	1.43214e-19	5.30758e-18	34.3109
LHFPL2	1.47831	7.02541	12.4977	1.19893e-16	1.98877e-15	27.557
FOXJ3	1.47707	6.80344	8.25785	9.52696e-11	4.4236e-10	13.9229
SLC2A3	1.47661	7.38366	5.84621	4.40635e-07	1.15982e-06	5.51125
FN1	1.47655	8.01526	14.0493	1.46108e-18	4.1115e-17	31.9813
LSP1	1.47598	6.27589	8.39794	5.88654e-11	2.83478e-10	14.405
CCDC110	1.47506	4.19846	10.7081	2.83372e-14	2.6244e-13	22.068
PCSK5	1.47464	5.68351	13.8178	2.76696e-18	7.24858e-17	31.3406
RRAD	1.47461	6.44298	7.0369	6.70968e-09	2.3003e-08	9.67099
BGN	1.47393	8.36215	9.84792	4.53079e-13	3.22172e-12	19.2851
TAF1A	1.47276	4.45465	12.2328	2.62348e-16	4.00482e-15	26.7705
LINC01268	1.46986	5.94818	7.01181	7.32838e-09	2.50132e-08	9.58304
RAB38	1.46952	7.11205	13.7105	3.72859e-18	9.3493e-17	31.0412
SPRY1	1.46814	7.96518	8.46729	4.64127e-11	2.27521e-10	14.6431
VEGFC	1.46629	6.82662	10.2594	1.18923e-13	9.53529e-13	20.6278
HTRA4	1.46448	3.79941	10.9772	1.21316e-14	1.21174e-13	22.92
ANO4	1.46359	4.17483	8.16654	1.30506e-10	5.92803e-10	13.6079
MAP4K4	1.46303	6.73325	15.357	4.46723e-20	1.91056e-18	35.4787
TNAP	1.46246	5.39412	19.8988	1.00776e-24	2.04405e-22	46.1704
KLF10	1.46113	9.85788	7.43709	1.64834e-09	6.21534e-09	11.072
MYOF	1.45998	8.19132	13.4386	7.98921e-18	1.80507e-16	30.2764
CD40	1.4597	6.75051	16.8767	9.88753e-22	7.0577e-20	39.2943
CASP12	1.45968	4.03431	13.7648	3.20574e-18	8.21937e-17	31.1929
SIPA1L2	1.45962	6.54601	16.5217	2.35547e-21	1.51267e-19	38.4258
CFP	1.45856	5.07531	15.2206	6.36772e-20	2.60377e-18	35.1234
RPL36	1.45587	10.4831	11.9366	6.36416e-16	8.82709e-15	25.8805
TUBA1A	1.45577	10.8834	9.95124	3.23202e-13	2.37231e-12	19.6242
LOC101928054	1.45559	5.10151	13.1568	1.77718e-17	3.65536e-16	29.4737
CD27	1.45548	6.38919	5.09996	5.82437e-06	1.3296e-05	2.96359
GNG11	1.45515	7.53798	10.4002	7.56189e-14	6.37502e-13	21.0824
PLEKHA2	1.45358	7.29569	11.2677	4.90695e-15	5.36127e-14	23.8291
JAG2	1.45345	7.18969	12.8777	3.96151e-17	7.35103e-16	28.6689
CHST9	1.45292	5.35634	5.87887	3.93087e-07	1.0423e-06	5.62433
COL1A1	1.45291	7.05028	9.17213	4.25631e-12	2.50848e-11	17.0377
LOC100507311	1.45276	7.59906	7.58796	9.7281e-10	3.81855e-09	11.5988
GUCY1A3	1.45062	8.16278	10.4065	7.41123e-14	6.26605e-13	21.1026
MAN2B1	1.44776	7.73099	11.5934	1.80225e-15	2.20555e-14	24.835
DLGAP5	1.44715	3.46209	14.201	9.64838e-19	2.80762e-17	32.3977
OAS2	1.44373	5.13264	14.6025	3.26029e-19	1.09134e-17	33.486
IL10RB	1.44267	7.86337	13.9636	1.84902e-18	5.06405e-17	31.7451
GBP4	1.44021	6.20632	8.07211	1.80838e-10	8.00487e-10	13.2814
GINS3	1.43798	4.58127	23.4977	7.52896e-28	4.67389e-25	53.3142
LCK	1.43631	6.23649	6.10451	1.78294e-07	4.9598e-07	6.40803
AFAP1L1	1.43612	6.05175	16.8793	9.82599e-22	7.0577e-20	39.3006
ACKR3	1.43548	5.71135	13.6188	4.81653e-18	1.15948e-16	30.7843
MMRN2	1.43513	6.48084	13.2453	1.38099e-17	2.93475e-16	29.727
LRRK2	1.43511	8.96757	8.66114	2.39399e-11	1.23535e-10	15.3063
TMEM173	1.43499	7.34568	11.9551	6.01806e-16	8.43254e-15	25.9367
GIMAP4	1.43383	8.09039	12.4657	1.31754e-16	2.15644e-15	27.4622
DDIT4L	1.43242	7.68028	4.8024	1.59632e-05	3.44779e-05	1.97433
BEST4	1.43201	3.8522	6.95118	9.06974e-09	3.0605e-08	9.3705
SAP30	1.43171	5.61613	19.2558	4.06654e-24	6.88488e-22	44.7806
LINC01127	1.43164	4.95001	4.57959	3.35886e-05	6.92946e-05	1.24707
ARL4C	1.43103	6.97491	7.76397	5.2672e-10	2.1542e-09	12.2121
SLAMF8	1.43028	5.63578	8.39664	5.9129e-11	2.84614e-10	14.4006
EVI2B	1.42849	7.2548	6.55228	3.69265e-08	1.13534e-07	7.97232
KIF14	1.42845	3.52127	15.32	4.91652e-20	2.07332e-18	35.3827
SPRY4	1.42585	8.01914	12.442	1.41262e-16	2.29492e-15	27.3922
CNRIP1	1.42416	7.75924	9.51935	1.3376e-12	8.70181e-12	18.1988
EOGT	1.42363	6.75898	9.75721	6.10124e-13	4.23265e-12	18.9865
PTGS1	1.42256	6.70608	5.08085	6.21686e-06	1.41337e-05	2.89949
MYEOV	1.42146	5.89426	5.7896	5.36965e-07	1.39668e-06	5.31551
PVRIG	1.41963	5.64333	6.1365	1.59361e-07	4.46969e-07	6.51942
FLJ12120	1.41922	3.85026	7.58183	9.93841e-10	3.8914e-09	11.5774
STC1	1.41814	7.91011	6.46779	4.97162e-08	1.49601e-07	7.67653
ISG20	1.41669	6.50735	10.9588	1.28534e-14	1.27761e-13	22.8619
RNF149	1.41529	10.0351	14.5193	4.07534e-19	1.32731e-17	33.2622
AMICA1	1.41498	6.60259	10.4948	5.58612e-14	4.85933e-13	21.3865
PSTPIP1	1.41494	5.29136	9.01957	7.10779e-12	4.02238e-11	16.5235
NEURL1B	1.41312	8.13017	10.6476	3.43286e-14	3.11313e-13	21.8754
NID2	1.41173	7.94843	7.80511	4.56483e-10	1.88577e-09	12.3552
PIK3R3	1.41129	6.92437	10.3798	8.07343e-14	6.75622e-13	21.0167
PHKA2	1.41078	7.13542	9.59417	1.04419e-12	6.92496e-12	18.4473
UBE2L6	1.40921	8.62897	11.5008	2.39245e-15	2.83304e-14	24.5505
DARS	1.40891	9.53158	11.9265	6.55906e-16	9.06673e-15	25.8502
GUCY1B3	1.40643	8.11674	10.3473	8.96243e-14	7.39445e-13	20.9118
LOC100505812	1.40536	5.35631	12.9157	3.55008e-17	6.70955e-16	28.779
NNMT	1.4041	5.48746	7.39594	1.90372e-09	7.11022e-09	10.9281
HLA-DRB1 /// HLA-DRB1	1.40353	11.897	10.4052	7.44133e-14	6.28632e-13	21.0986
ARL4A	1.40155	7.75993	14.7346	2.29075e-19	8.06327e-18	33.8399
ABCC1	1.40064	6.84447	14.3582	6.29497e-19	1.95096e-17	32.8261
BC036055 /// PREX2	1.39866	4.20172	16.1656	5.70067e-21	3.14605e-19	37.541
LINC00324	1.39672	5.97639	14.5371	3.88557e-19	1.27625e-17	33.31
MCTP1	1.39666	4.77541	11.2982	4.46521e-15	4.91269e-14	23.9238
HCG27	1.39658	5.55755	9.91126	3.6828e-13	2.66946e-12	19.4931
SIGLEC10	1.39607	5.57224	12.677	7.09528e-17	1.24128e-15	28.0837
GPR176	1.39585	5.6393	13.3867	9.25028e-18	2.0531e-16	30.1292
CXorf36	1.39519	5.35765	17.6788	1.45916e-22	1.39034e-20	41.2074
UNC5B	1.39296	7.26637	16.2595	4.50929e-21	2.59487e-19	37.7757
CHST11	1.39276	5.87688	11.4884	2.48503e-15	2.93082e-14	24.5124
HLA-A	1.39267	12.8229	15.6293	2.21498e-20	1.05281e-18	36.1816
INSIG2	1.39241	8.75268	14.1395	1.14122e-18	3.27437e-17	32.2293
KCTD11	1.39215	6.28059	12.2307	2.64008e-16	4.02715e-15	26.7642
LOC101928554	1.39202	3.95053	6.99952	7.65208e-09	2.60573e-08	9.53995
ECSCR	1.39191	7.2922	11.9998	5.26154e-16	7.46971e-15	26.0716
LOC100422737	1.3918	7.7714	4.6817	2.3916e-05	5.04264e-05	1.57881
PATL2	1.39142	5.10797	13.227	1.45464e-17	3.06582e-16	29.6748
LOC100506498	1.39128	7.96044	4.16715	0.000129061	0.000246292	-0.0619107
SCARF1	1.38805	5.37233	20.2476	4.7982e-25	1.117e-22	46.909
LAMA4	1.38791	5.23618	17.2099	4.43032e-22	3.5315e-20	40.0972
TTLL7	1.38709	4.82479	11.494	2.44303e-15	2.88461e-14	24.5295
CLTC-IT1	1.38706	4.81131	15.4827	3.2283e-20	1.44399e-18	35.8042
SSPN	1.38623	5.79391	13.1505	1.80912e-17	3.7136e-16	29.4559
RARRES3	1.38622	8.80053	6.82634	1.40717e-08	4.59276e-08	8.9328
MATN1-AS1	1.38621	4.11601	13.5778	5.40263e-18	1.27952e-16	30.669
ZNF680	1.38602	6.2358	18.6934	1.41983e-23	1.88874e-21	43.5337
EFNB2	1.38003	8.52248	9.62955	9.29008e-13	6.23636e-12	18.5646
CIART	1.37903	6.67553	10.5501	4.68245e-14	4.14183e-13	21.5637
CCL4	1.37894	7.72208	3.91508	0.000286969	0.000521729	-0.833731
FBLN2	1.37815	5.75224	10.3972	7.63561e-14	6.41868e-13	21.0727
HK2	1.37684	4.98441	17.8921	8.86801e-23	8.94926e-21	41.7049
ERAP2	1.3767	5.37183	6.89184	1.11752e-08	3.71047e-08	9.16244
IFI44	1.37654	6.9131	8.51779	3.90465e-11	1.93588e-10	14.8162
DSN1	1.3759	6.23025	16.4757	2.63796e-21	1.65264e-19	38.3124
RB1	1.3758	7.0583	24.1067	2.44136e-28	1.7862e-25	54.4267
CST7	1.37501	6.48725	5.04666	6.98493e-06	1.57644e-05	2.78503
KCNN3	1.37426	5.47077	11.5479	2.07069e-15	2.48653e-14	24.6956
LCP1	1.37308	7.80946	7.69014	6.81138e-10	2.74249e-09	11.955
PELI1	1.37263	7.71506	11.8229	8.96815e-16	1.19688e-14	25.536
PRR11	1.37197	8.31566	17.9423	7.89371e-23	8.3356e-21	41.8212
FRMD6	1.37114	7.00616	6.45614	5.17976e-08	1.55363e-07	7.63575
HEY2	1.3697	6.32866	9.2802	2.96439e-12	1.80203e-11	17.4005
DIAPH2	1.3694	5.91456	14.2648	8.10959e-19	2.41472e-17	32.572
ASAP1	1.36564	7.50742	17.5308	2.06709e-22	1.84115e-20	40.8593
HS3ST2	1.36512	5.07198	8.16837	1.29683e-10	5.89326e-10	13.6142
SLC16A1	1.36464	6.23157	6.993	7.82943e-09	2.66258e-08	9.5171
HLA-C	1.36391	11.9569	13.8142	2.79496e-18	7.31258e-17	31.3305
LEPROTL1	1.36305	8.56919	11.7573	1.09391e-15	1.41745e-14	25.3365
LCP2	1.36304	5.16035	10.7386	2.57285e-14	2.40453e-13	22.165
HLX	1.3629	6.99643	9.14103	4.72436e-12	2.755e-11	16.9331
PTRF	1.36277	7.94423	13.7266	3.56521e-18	8.9726e-17	31.0862
SST	1.36263	5.56499	3.16023	0.0027391	0.00436135	-2.98252
EVA1C	1.36226	6.92705	9.57728	1.10416e-12	7.29671e-12	18.3912
TCIRG1	1.36158	7.05978	9.57532	1.11134e-12	7.33704e-12	18.3847
TPX2	1.36152	4.67205	12.1267	3.59917e-16	5.35459e-15	26.453
SLC15A4	1.3613	6.70423	17.1661	4.92127e-22	3.86272e-20	39.9921
SAMSN1	1.36089	5.07551	7.90629	3.21187e-10	1.36539e-09	12.7067
PRDX4	1.36073	10.0689	16.8409	1.07857e-21	7.62723e-20	39.2073
CLU	1.35984	8.40945	10.3734	8.23978e-14	6.88137e-13	20.9962
VWCE	1.35914	6.18662	9.15696	4.47844e-12	2.6258e-11	16.9867
ELK3	1.35689	6.98072	14.2534	8.36466e-19	2.48338e-17	32.5409
RECQL	1.35679	7.96099	16.5682	2.10054e-21	1.36608e-19	38.5404
AEBP1	1.35643	8.95649	5.29292	3.00637e-06	7.12005e-06	3.6144
ASPHD1	1.35615	5.60102	10.7086	2.82914e-14	2.62134e-13	22.0696
PRR16	1.35512	4.05027	13.2394	1.4044e-17	2.97831e-16	29.7101
ADAP2	1.35333	7.52255	11.1151	7.88411e-15	8.21526e-14	23.3528
PKM	1.35228	8.21741	10.7965	2.14242e-14	2.03381e-13	22.3488
PLIN2	1.35179	7.64465	10.1385	1.75789e-13	1.36668e-12	20.2355
SIRPB2	1.35066	4.87334	12.1585	3.27314e-16	4.90158e-15	26.5483
TNFAIP8L2	1.34933	5.25869	11.2375	5.38958e-15	5.82644e-14	23.7348
RAB7B	1.34814	4.71098	14.3605	6.25445e-19	1.94134e-17	32.8326
PLXDC1	1.34563	6.34299	14.0504	1.45676e-18	4.10499e-17	31.9843
RNF125	1.345	5.89678	9.85189	4.47218e-13	3.1889e-12	19.2982
RIT1	1.34464	7.6853	10.6654	3.24405e-14	2.9563e-13	21.9322
C4orf6	1.34433	4.06978	11.115	7.88803e-15	8.21526e-14	23.3523
ALOX5AP	1.34368	7.8764	8.08306	1.74118e-10	7.73411e-10	13.3193
SERPINH1	1.34349	8.10119	10.6687	3.21056e-14	2.92838e-13	21.9426
SLFN12	1.3432	5.45473	9.85699	4.3981e-13	3.14655e-12	19.315
EVL	1.3425	7.64485	11.3909	3.3541e-15	3.82584e-14	24.2112
PCDHB7	1.34193	5.52291	5.29065	3.02994e-06	7.17007e-06	3.60671
HLA-E	1.34027	11.0257	11.8665	7.86194e-16	1.0631e-14	25.6683
SLC1A4	1.33868	5.61886	18.5533	1.94754e-23	2.44769e-21	43.2184
SIGLEC1	1.33863	6.29769	9.96346	3.10576e-13	2.2903e-12	19.6642
PCDHB6	1.33793	4.86295	7.96566	2.61423e-10	1.1289e-09	12.9127
P2RY13	1.33747	5.58475	7.31049	2.56804e-09	9.41412e-09	10.6293
S100A10	1.33699	9.22061	7.10328	5.31385e-09	1.84946e-08	9.90361
NCAPG2	1.33683	5.28492	13.867	2.41444e-18	6.39046e-17	31.4773
LOC283070	1.33618	6.49942	11.6103	1.71149e-15	2.10328e-14	24.8869
CYSLTR1	1.33425	4.15033	14.3983	5.64779e-19	1.77455e-17	32.9349
KIF18A	1.33384	3.44873	17.0163	7.05488e-22	5.37272e-20	39.632
NAF1	1.33365	6.08373	15.4948	3.12932e-20	1.40586e-18	35.8354
CFD	1.33354	7.41535	5.93646	3.21352e-07	8.6258e-07	5.82394
MCM2	1.33308	6.73227	16.283	4.25268e-21	2.4541e-19	37.8344
IRF1	1.33241	7.53285	6.64664	2.6489e-08	8.31909e-08	8.30289
NMI	1.33161	8.40906	11.893	7.2574e-16	9.91167e-15	25.7486
GPR171	1.33148	5.33595	5.75199	6.12289e-07	1.58017e-06	5.18561
BCL11B	1.33108	4.78601	7.83893	4.05842e-10	1.69054e-09	12.4728
KLHL6	1.32865	4.39016	14.2887	7.59975e-19	2.28954e-17	32.6371
BNIP3	1.32689	10.4741	7.92544	3.0054e-10	1.28536e-09	12.7732
TGFA	1.32683	6.66817	16.2126	5.06926e-21	2.86652e-19	37.6585
DUSP1	1.32494	8.81966	11.9454	6.19723e-16	8.63062e-15	25.9072
ANKRD13A	1.32481	8.24061	11.4266	3.00497e-15	3.48189e-14	24.3216
ARHGEF10	1.32425	6.63444	16.0546	7.53122e-21	4.01783e-19	37.2622
NUPR1	1.32396	8.86322	8.16992	1.28993e-10	5.86322e-10	13.6196
SNAP25	1.32382	5.16793	8.40587	5.72861e-11	2.76283e-10	14.4323
FBN1	1.32274	6.45677	8.74021	1.8293e-11	9.62876e-11	15.5759
KIF20A	1.3227	4.08056	11.4154	3.11016e-15	3.57814e-14	24.287
SFR1	1.32189	6.53093	11.1318	7.48543e-15	7.8278e-14	23.4049
LOC100996385	1.32079	3.85951	19.0583	6.28856e-24	9.98662e-22	44.346
NDRG1	1.32053	11.9731	12.491	1.22301e-16	2.02054e-15	27.537
MYOT	1.32041	4.36009	5.3023	2.91086e-06	6.90104e-06	3.64621
ARHGAP9	1.31868	6.1865	6.98505	8.05147e-09	2.72993e-08	9.48922
OSMR	1.31864	6.84952	8.36166	6.66711e-11	3.17708e-10	14.2803
LOC101928370	1.31854	3.99067	12.9026	3.68711e-17	6.91705e-16	28.741
GPNMB	1.31677	7.40488	4.90976	1.11153e-05	2.45429e-05	2.32904
DDX60	1.31641	7.91061	10.4793	5.87038e-14	5.07643e-13	21.3367
NOTCH2NL	1.31585	9.55353	8.96337	8.59116e-12	4.80083e-11	16.3335
FYB	1.31472	5.71597	7.72614	6.00857e-10	2.43746e-09	12.0804
E2F8	1.31417	3.31342	10.1145	1.90006e-13	1.468e-12	20.1574
DGKD	1.3127	7.51369	13.4469	7.80353e-18	1.77036e-16	30.3
IFNGR2	1.31028	9.24264	16.6436	1.74544e-21	1.17622e-19	38.7257
SHISA9	1.31012	5.20045	9.34623	2.37813e-12	1.47408e-11	17.6215
HTATSF1P2	1.30935	3.25139	11.7848	1.00661e-15	1.32104e-14	25.42
SCG5	1.30935	4.51599	5.26238	3.33919e-06	7.85561e-06	3.51098
LINC00173	1.30919	5.83839	7.55299	1.09916e-09	4.27194e-09	11.4768
PGK1	1.30713	9.10802	13.1121	2.01911e-17	4.08729e-16	29.3456
ANKRD36B	1.30698	8.00474	9.61102	9.87638e-13	6.58619e-12	18.5031
CYYR1	1.30669	8.16452	12.0391	4.67653e-16	6.77535e-15	26.19
HOXA4	1.30667	7.27118	10.6887	3.013e-14	2.76915e-13	22.0064
BC069782 /// STAMBPL1	1.30666	4.99752	11.866	7.87358e-16	1.06397e-14	25.6668
HMOX1	1.30663	9.01548	7.97473	2.53331e-10	1.09789e-09	12.9442
ICAM1	1.30649	6.83133	9.37548	2.15728e-12	1.34861e-11	17.7193
MCTP2	1.30405	5.1311	15.3198	4.91864e-20	2.07332e-18	35.3822
TSPAN13	1.304	8.93951	8.83407	1.33034e-11	7.17385e-11	15.8951
TNFRSF11A	1.30289	4.10361	9.67476	8.00319e-13	5.43252e-12	18.7142
PSMB8-AS1	1.30275	6.07639	13.8917	2.25505e-18	6.04673e-17	31.5459
ITGAL	1.30153	5.99827	6.1105	1.74586e-07	4.8641e-07	6.42888
CLIP2	1.301	6.3643	9.313	2.6569e-12	1.63011e-11	17.5103
COL3A1	1.30074	8.4109	5.28648	3.07365e-06	7.26932e-06	3.59259
CARD6	1.30026	7.18727	9.23258	3.47611e-12	2.08039e-11	17.2408
IL33	1.29974	5.62741	6.07537	1.97491e-07	5.45771e-07	6.30659
CCR7	1.29962	4.90149	5.31042	2.83062e-06	6.7178e-06	3.67375
LINC00260	1.29923	4.77644	14.0122	1.61785e-18	4.49096e-17	31.8791
BICD1	1.29886	6.3269	11.0596	9.37431e-15	9.63583e-14	23.1789
NOV	1.29662	6.40601	6.71491	2.08298e-08	6.63843e-08	8.54216
PHLDA1	1.29642	7.24393	7.33844	2.32846e-09	8.58393e-09	10.727
AFAP1	1.29566	3.73551	15.7257	1.73161e-20	8.42609e-19	36.4283
EP300-AS1	1.29475	4.71214	5.97004	2.85701e-07	7.72146e-07	5.94047
MGARP	1.29473	6.30547	3.6792	0.000594719	0.00103777	-1.53335
COL5A1	1.29412	6.27118	6.65628	2.56051e-08	8.05755e-08	8.33667
SLC16A14	1.2937	5.98528	6.47072	4.92062e-08	1.48132e-07	7.68678
SPATA18	1.29278	6.92501	10.4576	6.29138e-14	5.40173e-13	21.2671
ZNF267	1.29137	6.88216	9.0953	5.50873e-12	3.17356e-11	16.779
CCDC109B	1.29	6.47187	5.82229	4.7905e-07	1.25384e-06	5.42849
GNRH1	1.28839	4.56367	10.8942	1.57429e-14	1.53942e-13	22.6583
STEAP4	1.28795	5.44359	7.09998	5.3758e-09	1.87039e-08	9.89205
RARRES2	1.28755	9.7158	5.43848	1.81955e-06	4.42804e-06	4.10946
ZFAS1	1.28746	8.92693	11.6092	1.71715e-15	2.10897e-14	24.8836
EHBP1L1	1.28666	5.82324	12.7759	5.32061e-17	9.6203e-16	28.3728
IL21R	1.28649	4.15117	9.78207	5.62275e-13	3.92998e-12	19.0684
CDC42EP5	1.28567	6.2911	7.32789	2.41613e-09	8.8911e-09	10.6901
CLEC1A	1.28545	6.07312	10.774	2.30032e-14	2.16764e-13	22.2774
CD74	1.28516	8.50268	9.24999	3.27946e-12	1.97749e-11	17.2992
STK10	1.28341	6.51299	13.658	4.31688e-18	1.06038e-16	30.8942
MN1	1.2831	5.25677	7.70843	6.391e-10	2.5839e-09	12.0187
ARHGAP22	1.28144	3.93701	22.7437	3.14294e-27	1.533e-24	51.9004
PLXNC1	1.28109	5.49173	12.6396	7.91248e-17	1.36674e-15	27.9743
TNFRSF10B	1.28108	7.10387	14.4743	4.60089e-19	1.47502e-17	33.1405
PCDHB12	1.28021	5.73504	20.4882	2.89347e-25	7.40946e-23	47.4122
CEP55	1.28004	3.24878	13.0782	2.22498e-17	4.42534e-16	29.2481
TYMS	1.27896	6.51191	11.5907	1.81702e-15	2.21965e-14	24.8268
LST1	1.2789	6.75922	9.06667	6.0654e-12	3.46986e-11	16.6825
CRNDE	1.27845	7.46957	5.40156	2.06724e-06	4.99403e-06	3.98357
MIR4435-1HG /// RP11-181E10.3	1.27812	3.94226	19.39	3.03024e-24	5.59257e-22	45.0738
TMCC1	1.27761	6.8722	12.1246	3.62174e-16	5.38034e-15	26.4467
FBXL16	1.27602	6.31033	13.4457	7.82987e-18	1.77437e-16	30.2966
ATP8B3	1.27579	4.20043	9.21021	3.74641e-12	2.22978e-11	17.1657
PYHIN1	1.27475	4.17543	7.56453	1.05573e-09	4.11487e-09	11.5171
SEC61G	1.27364	9.66828	15.8094	1.39921e-20	6.99125e-19	36.6418
TRG-AS1	1.27032	4.9951	5.77956	5.5612e-07	1.44321e-06	5.28082
TRPV2	1.26951	5.11485	17.5203	2.11902e-22	1.87113e-20	40.8345
C1S	1.26935	8.11616	4.4281	5.53478e-05	0.000111206	0.760251
GSAP	1.26921	8.63301	11.1608	6.83886e-15	7.24036e-14	23.4956
GNGT1	1.26829	3.67777	7.57539	1.01645e-09	3.97309e-09	11.555
PCDHGC3	1.26813	4.19314	25.4164	2.34711e-29	2.53068e-26	56.7351
KCNK17	1.26793	4.32061	19.2724	3.92112e-24	6.75026e-22	44.8169
ETS1	1.26756	6.74475	14.5369	3.88742e-19	1.27625e-17	33.3096
TREM2	1.26752	6.83589	9.28128	2.9537e-12	1.79607e-11	17.4041
LXN	1.26583	8.3666	9.32957	2.51402e-12	1.54897e-11	17.5658
DDX26B	1.26502	6.54129	11.6392	1.56688e-15	1.94423e-14	24.9756
PLCB4	1.26466	6.8595	6.2617	1.02648e-07	2.94723e-07	6.95608
TCF19	1.26368	5.64947	11.4144	3.12026e-15	3.58358e-14	24.2838
IRF8	1.26316	7.85959	6.92685	9.88024e-09	3.31e-08	9.28519
SOX17	1.26314	5.49086	7.92677	2.99158e-10	1.28025e-09	12.7778
CXCL16	1.26214	7.63742	8.2075	1.13312e-10	5.21173e-10	13.7493
TMEM44	1.26204	5.71029	13.8848	2.29822e-18	6.13038e-17	31.5268
IGJ	1.2607	7.18403	2.46315	0.0174388	0.0245787	-4.69085
DOCK8	1.26041	6.48543	12.422	1.49843e-16	2.4228e-15	27.333
OGFRL1	1.25909	6.97445	10.9566	1.29427e-14	1.28586e-13	22.855
SLC38A1	1.25861	7.32389	11.7981	9.66881e-16	1.27708e-14	25.4605
LOC340184	1.25853	3.24026	17.3088	3.49891e-22	2.89027e-20	40.3332
NMB	1.25771	7.80342	8.03249	2.074e-10	9.11173e-10	13.1443
FAS	1.2575	7.4374	7.26413	3.02134e-09	1.09298e-08	10.467
NMU	1.25611	4.33694	4.82587	1.47515e-05	3.20025e-05	2.05164
RUNX3	1.25553	5.51334	9.53833	1.25608e-12	8.21583e-12	18.2619
ADCY3	1.25547	6.70403	13.3186	1.12146e-17	2.44703e-16	29.9359
DTX3L	1.25415	8.73748	10.1685	1.59515e-13	1.25061e-12	20.333
APOL3	1.25302	7.45089	9.46055	1.62573e-12	1.04142e-11	18.0031
SGOL2	1.25243	5.00231	15.0252	1.06202e-19	4.08958e-18	34.6107
HAUS2	1.25215	6.52098	28.7512	9.40386e-32	2.75211e-28	62.1446
CHST15	1.25197	6.93701	11.3304	4.04282e-15	4.5036e-14	24.0236
ABCC3	1.25186	7.45341	10.7719	2.31525e-14	2.1787e-13	22.2709
PPP1R18	1.25141	7.62997	8.05535	1.91628e-10	8.46056e-10	13.2234
CENPE	1.25077	3.9634	10.0252	2.53985e-13	1.90754e-12	19.8661
TMEM130	1.25066	5.26248	4.9953	8.31806e-06	1.86356e-05	2.61349
ICAM2	1.25032	8.10531	12.239	2.57583e-16	3.94382e-15	26.789
STAT1	1.25027	7.8853	6.70739	2.13891e-08	6.80506e-08	8.51578
RBM28	1.24981	7.14898	18.1493	4.89381e-23	5.63228e-21	42.2986
PALD1	1.24914	6.25234	10.8325	1.91244e-14	1.83505e-13	22.4629
PARP12	1.24892	7.53419	11.3048	4.37488e-15	4.82108e-14	23.9443
ANGPTL2	1.24703	6.43597	9.68778	7.66711e-13	5.22864e-12	18.7572
PLOD3	1.2469	8.89806	13.9457	1.94282e-18	5.28561e-17	31.6954
FGR	1.24614	6.4039	10.5844	4.19721e-14	3.73519e-13	21.6735
GRAMD4	1.24568	6.66083	7.69229	6.76053e-10	2.72362e-09	11.9625
PARP8	1.24448	6.64945	9.851	4.48534e-13	3.19606e-12	19.2953
DOCK4	1.24424	5.97603	14.3503	6.43112e-19	1.98117e-17	32.8046
GPR82	1.24342	3.56758	9.79213	5.4402e-13	3.81933e-12	19.1016
CRIP2	1.24337	8.62594	8.97145	8.35998e-12	4.6793e-11	16.3608
LOC338620	1.24309	5.11433	13.0599	2.34498e-17	4.63253e-16	29.1954
DNAH11	1.24286	4.03441	9.33934	2.43336e-12	1.50513e-11	17.5985
KIF2A	1.24185	5.85747	10.6075	3.89959e-14	3.48852e-13	21.7474
SEMA3F	1.24116	6.9713	13.2182	1.49166e-17	3.12562e-16	29.6496
PLEKHG1	1.24	6.61398	9.27508	3.01557e-12	1.83097e-11	17.3833
LINC00342	1.23957	6.83172	15.007	1.1141e-19	4.26606e-18	34.5627
RGS10	1.23876	6.10684	11.433	2.94633e-15	3.41781e-14	24.3414
HAUS6	1.23866	5.61932	14.7504	2.19691e-19	7.75963e-18	33.8819
PTPRE	1.23805	5.60288	14.6688	2.73062e-19	9.4333e-18	33.6638
APCDD1	1.23789	6.29127	5.34408	2.52073e-06	6.02211e-06	3.78802
FLNA	1.23729	8.63243	9.68109	7.8379e-13	5.33092e-12	18.7351
BCAT1	1.23721	5.39868	11.202	6.01705e-15	6.44356e-14	23.6242
BST2	1.23602	8.79997	9.91197	3.67427e-13	2.66496e-12	19.4955
FMNL3	1.23591	5.43254	14.6717	2.7093e-19	9.39132e-18	33.6717
SPIN4	1.23445	5.95956	10.556	4.59396e-14	4.06882e-13	21.5828
AOAH	1.23444	6.56331	8.35235	6.88382e-11	3.27577e-10	14.2483
SLC1A3	1.23277	5.06878	9.00427	7.48392e-12	4.22124e-11	16.4718
ITGA7	1.23146	7.04094	9.67075	8.10976e-13	5.50121e-12	18.7009
ANXA1	1.23126	6.45121	5.81243	4.95837e-07	1.29513e-06	5.39439
CDKN3	1.23081	4.68458	13.6352	4.60053e-18	1.11799e-16	30.8303
DOCK11	1.23073	6.04753	9.29702	2.80251e-12	1.71124e-11	17.4568
RHOH	1.23064	5.25955	5.73	6.61088e-07	1.69925e-06	5.10974
MAP1B	1.23043	7.37398	10.2689	1.15331e-13	9.27266e-13	20.6586
CIB4	1.22821	3.80967	9.28987	2.87021e-12	1.74997e-11	17.4329
VASH1	1.22813	5.36972	16.7841	1.2383e-21	8.62849e-20	39.0692
CCNE2	1.22809	3.62577	18.7537	1.23993e-23	1.71629e-21	43.6689
IL2RG	1.22752	6.18609	5.6004	1.03792e-06	2.60224e-06	4.66375
CD3G	1.2261	4.66418	7.12758	4.879e-09	1.70828e-08	9.98877
SULT1C4	1.22578	5.7481	6.61764	2.93368e-08	9.15591e-08	8.20126
ENO1	1.22508	8.88241	12.0066	5.15585e-16	7.33491e-15	26.092
TMEM2	1.2249	7.48703	9.63818	9.02924e-13	6.07665e-12	18.5931
COL6A2	1.22456	7.2451	10.1476	1.70686e-13	1.33055e-12	20.2651
SLC17A2	1.22031	4.86841	4.80121	1.60275e-05	3.46021e-05	1.97039
PARP9	1.22029	6.90509	12.7175	6.3043e-17	1.11625e-15	28.2024
GIMAP1	1.21983	6.5026	10.6878	3.02198e-14	2.77366e-13	22.0034
TIGIT	1.21977	4.59942	7.33677	2.34209e-09	8.62949e-09	10.7212
CPNE2	1.21974	8.1051	12.9339	3.36863e-17	6.39571e-16	28.8317
FMNL1	1.21928	5.27579	11.4143	3.12072e-15	3.58358e-14	24.2836
SCD	1.2184	6.5338	10.1156	1.89384e-13	1.46405e-12	20.1607
SEC14L4	1.21815	4.60919	16.4095	3.10727e-21	1.90585e-19	38.1485
MALL	1.21785	7.33832	8.41846	5.48643e-11	2.65333e-10	14.4755
ITGAM	1.21779	6.55397	8.43682	5.15186e-11	2.50512e-10	14.5385
ABLIM3	1.21775	7.74405	6.44001	5.48237e-08	1.63911e-07	7.57929
TPSB2	1.21769	7.0902	4.44615	5.21659e-05	0.000105184	0.817895
RDM1	1.21766	4.09322	24.6594	8.97061e-29	7.35087e-26	55.4144
PTPRK	1.21608	7.50228	10.6621	3.27801e-14	2.9846e-13	21.9217
SGK223	1.21569	7.84461	10.2023	1.43036e-13	1.12788e-12	20.4425
KNTC1	1.21447	5.66826	16.4231	3.00394e-21	1.84801e-19	38.1824
IFFO1	1.21397	7.77979	13.5779	5.40055e-18	1.27952e-16	30.6694
TMEM71	1.21215	5.43977	6.71512	2.08149e-08	6.63473e-08	8.54287
NCF4	1.21168	5.92072	6.95786	8.85929e-09	2.99392e-08	9.3939
PRND	1.211	4.09992	12.0028	5.21538e-16	7.41445e-15	26.0805
SERTAD2	1.211	8.62128	13.1146	2.00513e-17	4.07511e-16	29.3526
CD99	1.21082	9.61019	11.4712	2.62004e-15	3.07588e-14	24.4593
ZAK	1.21061	6.56998	12.7594	5.58095e-17	1.00467e-15	28.3248
CYBB	1.21057	4.67328	12.898	3.7358e-17	6.97009e-16	28.7278
SMAP2	1.21029	7.97925	10.0264	2.52996e-13	1.90198e-12	19.87
CD70	1.21014	6.80969	7.01638	7.2117e-09	2.46314e-08	9.59905
PRF1	1.20808	6.82323	7.93032	2.95501e-10	1.26618e-09	12.7901
B2M	1.20787	10.6061	15.8057	1.41264e-20	7.04121e-19	36.6322
DEF6	1.20763	5.58495	9.75919	6.06171e-13	4.21075e-12	18.993
MYO1F	1.20684	6.95873	8.09442	1.67411e-10	7.46049e-10	13.3586
CORO1C	1.20653	8.39009	13.5717	5.49524e-18	1.29695e-16	30.652
LRRK1	1.20598	5.20761	13.6861	3.99127e-18	9.92296e-17	30.9729
SLC16A1-AS1	1.20365	4.36502	15.8105	1.39549e-20	6.99125e-19	36.6445
SNORD89	1.20185	6.55718	12.3003	2.14705e-16	3.34483e-15	26.9718
RNFT1	1.20176	5.70243	11.8434	8.42988e-16	1.1302e-14	25.5982
CLIC1	1.19978	10.5862	16.3051	4.0252e-21	2.36276e-19	37.8894
CDCA4	1.1995	6.15176	18.5558	1.93657e-23	2.44769e-21	43.224
POU5F1P3	1.19938	6.14067	9.69827	7.40671e-13	5.06793e-12	18.7919
CLEC7A	1.19935	4.70996	11.5194	2.25988e-15	2.69163e-14	24.6078
TMEM87B	1.19885	6.34598	12.0313	4.78822e-16	6.90299e-15	26.1663
LRRC41	1.19853	5.83132	7.41924	1.75461e-09	6.58936e-09	11.0096
LOC401220	1.19778	3.31694	6.60052	3.11589e-08	9.68767e-08	8.1413
ITGB2-AS1	1.19761	5.88215	7.22253	3.49598e-09	1.25273e-08	10.3214
BTNL9	1.19761	6.78418	7.65426	7.71907e-10	3.07711e-09	11.83
ITGA1	1.19743	7.27286	10.3215	9.73589e-14	7.95887e-13	20.8287
TLR4	1.19642	5.79529	11.0429	9.87693e-15	1.00766e-13	23.1265
SULF1	1.19632	7.60523	6.39537	6.4149e-08	1.8977e-07	7.42314
ASAP1-IT2	1.19537	5.33239	12.6446	7.79879e-17	1.35052e-15	27.9888
SEL1L3	1.19312	6.25055	12.2545	2.45956e-16	3.77993e-15	26.8353
KIF4A	1.19307	4.55642	11.7904	9.89575e-16	1.30118e-14	25.4372
KCTD9	1.193	8.18209	11.6994	1.30436e-15	1.65048e-14	25.1598
ARHGAP26	1.19264	5.4521	12.9605	3.1198e-17	5.97311e-16	28.9088
NRXN3	1.19169	5.25086	6.4897	4.60278e-08	1.39486e-07	7.75318
SLC41A2	1.19146	5.86864	10.2177	1.36081e-13	1.0776e-12	20.4925
CARD16	1.19086	4.88842	14.0317	1.53329e-18	4.2911e-17	31.933
KLRB1	1.19046	6.46749	5.99943	2.57745e-07	7.00844e-07	6.04255
C3orf67	1.18933	3.27075	7.64024	8.10578e-10	3.22062e-09	11.7811
EFNA1	1.18926	9.00672	8.92739	9.70119e-12	5.36551e-11	16.2117
AHR	1.18874	8.84692	8.02715	2.1127e-10	9.26387e-10	13.1258
REG1A	1.18846	6.26505	2.80736	0.007217	0.0108068	-3.8852
HECW2	1.187	4.75158	11.3829	3.43754e-15	3.9058e-14	24.1865
TTC13	1.18654	7.40841	10.956	1.29671e-14	1.28766e-13	22.8531
HHLA2	1.18638	4.08204	6.54917	3.73333e-08	1.14699e-07	7.96142
TAF5	1.18605	5.70693	11.9488	6.13325e-16	8.55897e-15	25.9176
REG1B	1.18567	4.54575	5.17107	4.56749e-06	1.05549e-05	3.20265
MET	1.18515	7.39488	12.374	1.72644e-16	2.75881e-15	27.1908
ZNF273	1.1841	4.37905	19.1392	5.25777e-24	8.61685e-22	44.5245
CELF2	1.18312	5.82276	9.12151	5.04433e-12	2.93075e-11	16.8674
ZNF532	1.18297	7.58057	10.554	4.62394e-14	4.09184e-13	21.5763
ALDOA	1.18289	10.9932	9.89764	3.85046e-13	2.77944e-12	19.4484
FBXO17	1.18258	8.05022	6.65457	2.57602e-08	8.10451e-08	8.33066
FAM216A	1.18242	6.73476	7.76365	5.27298e-10	2.15613e-09	12.211
ANXA2R	1.18199	5.84773	10.2397	1.26739e-13	1.01053e-12	20.5639
LOC100996412	1.18195	8.18721	9.32391	2.56193e-12	1.57525e-11	17.5469
RCSD1	1.18152	6.58476	7.87152	3.62397e-10	1.5232e-09	12.586
HES4	1.18089	6.80486	7.63901	8.14067e-10	3.23385e-09	11.7768
GPX8	1.18066	6.68265	6.81426	1.46829e-08	4.7821e-08	8.89044
CRLF3	1.18004	8.05366	10.6694	3.2033e-14	2.9252e-13	21.9449
BARD1	1.17951	5.17472	15.7392	1.67313e-20	8.21961e-19	36.4627
SLC16A6	1.17931	5.10848	9.41938	1.86407e-12	1.17972e-11	17.8658
GLYATL2	1.17896	3.71044	16.1243	6.32238e-21	3.45387e-19	37.4374
IL15	1.17761	6.21578	9.74845	6.27937e-13	4.34886e-12	18.9576
CTSW	1.17645	6.0746	7.18863	3.93776e-09	1.39856e-08	10.2026
LOC153682	1.17636	5.15897	7.77573	5.05602e-10	2.07404e-09	12.253
FLI1	1.17526	5.34135	12.3687	1.75344e-16	2.79106e-15	27.1752
CDKN1A	1.17525	9.18474	6.28378	9.49812e-08	2.74054e-07	7.03318
NEK5	1.17461	4.90784	6.98566	8.03425e-09	2.72515e-08	9.49136
PRKCH	1.17426	6.23882	18.1309	5.10489e-23	5.80993e-21	42.2565
LY75	1.17393	7.42403	5.24152	3.58729e-06	8.40546e-06	3.4404
WIPF1	1.17388	6.261	10.1384	1.75879e-13	1.36687e-12	20.235
SWAP70	1.17362	7.6507	13.222	1.47576e-17	3.10395e-16	29.6603
IFNGR1	1.1731	8.10503	12.1032	3.86004e-16	5.7054e-15	26.3827
PLEKHO1	1.17305	7.05076	7.44769	1.58831e-09	6.00446e-09	11.109
RAB27A	1.17279	6.97637	7.68098	7.03242e-10	2.82372e-09	11.9231
PCDHGA4	1.17274	5.72766	4.29193	8.62919e-05	0.000169117	0.328481
CD33	1.17079	5.75753	8.92127	9.90375e-12	5.46427e-11	16.1909
SOX7	1.1707	5.82735	7.20405	3.73024e-09	1.3297e-08	10.2566
CNOT8	1.17067	7.52662	16.8405	1.07971e-21	7.62723e-20	39.2063
ABCG2	1.17041	6.58194	5.60492	1.02178e-06	2.56302e-06	4.67924
PRIM1	1.16996	6.46192	11.7293	1.19119e-15	1.52232e-14	25.2509
IFI6	1.16944	7.4254	5.97832	2.77531e-07	7.51652e-07	5.96923
FIGNL1	1.169	5.34615	13.6158	4.85638e-18	1.16633e-16	30.776
SAMD9	1.16884	6.02221	9.78401	5.58716e-13	3.91044e-12	19.0748
NCK1	1.16864	6.67876	12.3416	1.90006e-16	3.00112e-15	27.0945
LIX1L	1.16851	6.48409	17.8433	9.93521e-23	9.73841e-21	41.5914
TAGLN2	1.16688	8.9799	10.5174	5.19758e-14	4.55032e-13	21.4589
AP1S2	1.16675	7.66947	13.5064	6.60088e-18	1.5297e-16	30.468
FPR1	1.1658	5.59654	8.95069	8.96698e-12	4.99721e-11	16.2905
TSPAN4	1.16576	8.27412	13.0727	2.26068e-17	4.47894e-16	29.2322
ESAM	1.16507	7.78208	7.67498	7.18098e-10	2.87773e-09	11.9022
OAS1	1.16443	7.13465	7.42494	1.71991e-09	6.46614e-09	11.0295
CEBPB	1.16386	10.165	6.26575	1.01196e-07	2.90759e-07	6.97022
FAIM3	1.16221	5.87851	6.93844	9.48553e-09	3.18924e-08	9.32582
DEGS1	1.16169	9.56467	9.68317	7.78446e-13	5.30211e-12	18.742
LOC441528	1.16165	6.02521	7.83234	4.15248e-10	1.72762e-09	12.4498
NUCB2	1.16125	7.41339	15.0011	1.13135e-19	4.31597e-18	34.5473
LURAP1L	1.16107	6.52981	6.99122	7.87849e-09	2.67704e-08	9.51087
SLC5A1	1.15997	6.13247	4.3867	6.33814e-05	0.000126319	0.628366
TAF1D	1.15895	7.26558	9.62031	9.57818e-13	6.404e-12	18.5339
NR3C1	1.15864	8.80207	10.8824	1.63408e-14	1.58832e-13	22.6209
NLRP11	1.15813	4.187	6.15721	1.48179e-07	4.17781e-07	6.59161
MSC	1.15791	5.07039	13.675	4.11592e-18	1.01589e-16	30.942
PCAT19	1.15564	6.34616	11.8016	9.56596e-16	1.26594e-14	25.4712
S100A12	1.15558	4.88387	5.02275	7.57716e-06	1.70521e-05	2.70509
CDKN2B	1.1554	3.98496	9.62581	9.40576e-13	6.29694e-12	18.5521
ATP7B	1.15431	6.22834	7.69737	6.642e-10	2.6785e-09	11.9802
LYL1	1.15416	7.02488	16.4774	2.62717e-21	1.65092e-19	38.3165
FER1L4	1.15217	4.72962	16.2011	5.21621e-21	2.93483e-19	37.6299
CCND3	1.15171	7.33757	12.008	5.13486e-16	7.31521e-15	26.0961
AGPAT5	1.15159	8.0611	7.93024	2.95584e-10	1.26628e-09	12.7898
LHFP	1.15127	8.42533	6.31436	8.52984e-08	2.47826e-07	7.13999
TNFRSF1B	1.15095	7.28346	8.22905	1.05205e-10	4.86286e-10	13.8236
ARHGDIB	1.15051	8.65028	13.9005	2.20112e-18	5.93317e-17	31.5702
RP2	1.15014	4.68136	17.789	1.12752e-22	1.09471e-20	41.465
SLAMF7	1.14999	4.89469	5.87353	4.00495e-07	1.06084e-06	5.60583
NUS1P3	1.14973	5.64016	7.60957	9.02131e-10	3.55747e-09	11.6742
FCN1	1.14954	5.93995	6.68157	2.34243e-08	7.41455e-08	8.42529
EPSTI1	1.14944	7.24181	7.46387	1.50093e-09	5.69938e-09	11.1656
FSTL3	1.14944	7.24928	6.19877	1.28054e-07	3.63742e-07	6.7365
LPGAT1	1.14859	7.43522	13.979	1.77232e-18	4.88006e-17	31.7876
CCDC85A	1.14856	5.29322	11.3033	4.39532e-15	4.83839e-14	23.9396
BRCA1	1.14609	5.1947	26.7128	2.55558e-30	3.66199e-27	58.9138
FRZB	1.14559	6.23113	6.15462	1.49535e-07	4.21429e-07	6.58257
TCERG1	1.14521	5.77929	16.9007	9.32785e-22	6.80037e-20	39.3526
AKR1B1	1.14514	10.6717	3.83329	0.000370278	0.000663883	-1.07893
CD48	1.14486	5.72721	7.49004	1.36962e-09	5.23374e-09	11.257
RPL3	1.14439	12.535	27.2712	1.01221e-30	1.72802e-27	59.8217
SHMT2	1.14249	8.33108	7.24968	3.17838e-09	1.14574e-08	10.4164
VSIG4	1.14237	8.01674	5.64461	8.90039e-07	2.24893e-06	4.81567
CCR10	1.14216	4.30915	9.91118	3.68377e-13	2.66946e-12	19.4929
TMEM54	1.14208	6.72602	8.75915	1.71532e-11	9.07687e-11	15.6404
ITGA5	1.14163	7.82696	11.2685	4.89475e-15	5.35079e-14	23.8316
DCK	1.141	7.88397	10.2782	1.11926e-13	9.04144e-13	20.6887
C12orf4	1.14066	6.59725	15.9676	9.37431e-21	4.88657e-19	37.0429
PCDHB2	1.14065	4.60132	6.24444	1.09069e-07	3.1224e-07	6.89582
NFKBIE	1.14048	7.15309	8.99167	7.8088e-12	4.39239e-11	16.4292
PXDN	1.13829	7.44955	7.38788	1.95818e-09	7.29236e-09	10.9
KDELC1	1.13796	6.46121	9.34927	2.35415e-12	1.46054e-11	17.6317
SOX9	1.13751	8.50245	4.29114	8.65116e-05	0.000169466	0.326013
MYBL1	1.1368	5.21432	11.9924	5.38072e-16	7.62834e-15	26.0491
DLEU2	1.13672	5.06954	12.4279	1.47246e-16	2.38646e-15	27.3506
LGALS3	1.13635	7.86119	9.43094	1.79376e-12	1.13803e-11	17.9044
ELOVL2	1.13613	3.90088	12.0735	4.21888e-16	6.16462e-15	26.2934
FHL5	1.13558	4.48634	8.27093	9.10748e-11	4.24229e-10	13.968
PBX4	1.13407	5.38127	10.1115	1.91871e-13	1.47936e-12	20.1476
LOC283588	1.13302	4.22232	9.74923	6.2633e-13	4.3392e-12	18.9602
PPP1R3B	1.13199	6.12189	15.3655	4.3693e-20	1.88839e-18	35.5009
RPS21	1.13171	10.0031	13.0427	2.46315e-17	4.8241e-16	29.146
ARHGEF6	1.13055	8.01627	9.21983	3.62762e-12	2.16348e-11	17.198
EFEMP2	1.12984	8.54115	9.62764	9.34889e-13	6.26911e-12	18.5582
CD163L1	1.12958	5.41741	7.15437	4.44096e-09	1.56507e-08	10.0826
GUCY1A2	1.1293	5.4751	7.67401	7.20533e-10	2.88636e-09	11.8988
FRMD6-AS1	1.12926	4.14406	13.2819	1.24446e-17	2.67352e-16	29.8315
TNFRSF1A	1.1272	8.9394	13.1848	1.64058e-17	3.40517e-16	29.554
HEATR5B /// HEATR5B	1.12658	5.9901	14.5431	3.82287e-19	1.26315e-17	33.3263
MARCKSL1	1.12613	8.41184	7.35587	2.19049e-09	8.11032e-09	10.788
FKBP11	1.12585	7.12308	7.5881	9.72331e-10	3.81739e-09	11.5993
BMP2K	1.12559	5.42839	14.3886	5.79727e-19	1.81511e-17	32.9087
ZMAT4	1.12475	5.59488	3.45938	0.00115129	0.001931	-2.16333
LOC102725408	1.12426	4.35565	6.72556	2.00639e-08	6.41331e-08	8.57946
FJX1	1.12391	6.78503	8.17525	1.26643e-10	5.7679e-10	13.638
RHOJ	1.12352	5.69434	9.14112	4.72294e-12	2.75496e-11	16.9334
PRSS23	1.12176	7.76682	11.7455	1.13392e-15	1.45914e-14	25.3004
NCF2	1.12175	6.29639	5.72607	6.7019e-07	1.72171e-06	5.09622
C7orf31	1.12174	5.6836	10.4749	5.95217e-14	5.13416e-13	21.3228
ZBED8	1.12159	6.28479	7.65308	7.75082e-10	3.08797e-09	11.8259
ANP32A-IT1	1.12139	4.03635	9.24776	3.30396e-12	1.98957e-11	17.2917
LOC102724870	1.1211	6.55813	12.9949	2.82626e-17	5.47765e-16	29.008
PKIB	1.12047	4.57827	6.65155	2.60357e-08	8.18426e-08	8.32007
DENND5A	1.11983	8.62691	17.9377	7.97734e-23	8.38071e-21	41.8106
CCNB1	1.11973	4.8467	9.84387	4.5913e-13	3.26135e-12	19.2718
GDI1	1.11879	8.90337	16.6478	1.72765e-21	1.16807e-19	38.736
NAPSB	1.11811	5.85126	6.13813	1.58449e-07	4.44533e-07	6.52511
PLEK	1.11782	6.68499	6.06215	2.06867e-07	5.70296e-07	6.26059
CD37	1.11759	5.10285	9.68828	7.65432e-13	5.22166e-12	18.7589
LILRA1	1.11522	4.26023	22.6102	4.06477e-27	1.85047e-24	51.6457
ENPP2	1.11489	10.3268	4.02006	0.000206226	0.000382262	-0.515145
CDCA7	1.11351	4.08227	12.3237	2.00304e-16	3.13957e-15	27.0415
CAMLG	1.11229	9.46183	12.779	5.27308e-17	9.55122e-16	28.3818
C17orf62	1.11137	6.93341	11.5045	2.36537e-15	2.80585e-14	24.562
CASP7	1.11125	7.53539	13.0975	2.10516e-17	4.24054e-16	29.3037
C5orf34	1.11041	4.47271	11.3561	3.73428e-15	4.20795e-14	24.1033
LYN	1.10974	7.5909	8.65281	2.4629e-11	1.26867e-10	15.2779
FLJ45482	1.10949	5.56697	7.8987	3.29761e-10	1.39807e-09	12.6804
CETP	1.10905	5.70703	6.81419	1.46865e-08	4.7825e-08	8.8902
LINC01158	1.10832	8.59623	8.61092	2.84085e-11	1.44662e-10	15.1348
PFKFB4	1.10771	5.89906	15.0708	9.41962e-20	3.67385e-18	34.7309
PUS7	1.10667	7.69563	9.84911	4.51308e-13	3.21136e-12	19.2891
CSGALNACT2	1.10639	6.92934	17.0683	6.22314e-22	4.79275e-20	39.7574
FCGR2A	1.1062	5.22293	12.7386	5.93014e-17	1.05819e-15	28.2639
RAB33A	1.10489	3.98897	9.81375	5.06759e-13	3.57119e-12	19.1728
RLF	1.10416	7.93398	11.0735	8.97668e-15	9.25497e-14	23.2225
WWC3	1.10342	7.90932	16.5962	1.96098e-21	1.29589e-19	38.6092
RNASE2	1.10202	4.57724	9.90688	3.73585e-13	2.70529e-12	19.4788
TRIB3	1.10165	6.03868	6.46404	5.03774e-08	1.5148e-07	7.66339
RRN3	1.10145	8.0084	13.5635	5.62225e-18	1.32236e-16	30.629
NGF	1.10123	5.94547	10.112	1.91571e-13	1.47761e-12	20.1492
SRGAP2	1.0998	5.48362	7.92322	3.02869e-10	1.29478e-09	12.7655
CENPF	1.09943	3.79545	20.1027	6.52259e-25	1.43679e-22	46.6035
LRRC66	1.09938	4.57111	7.79395	4.74543e-10	1.95722e-09	12.3164
QPCT	1.09853	6.50642	3.57201	0.000822682	0.00140833	-1.84336
VNN2	1.09754	6.11774	7.24799	3.19728e-09	1.15235e-08	10.4105
SEMA6A	1.09698	6.67233	9.76465	5.95382e-13	4.1416e-12	19.011
SQRDL	1.09684	9.97758	13.1347	1.89315e-17	3.86672e-16	29.4103
ACKR1	1.09561	6.80551	4.24771	9.957e-05	0.000193235	0.189567
BID	1.09513	6.63729	11.6284	1.61962e-15	2.00238e-14	24.9424
CX3CL1	1.09505	7.66652	9.64631	8.7903e-13	5.92362e-12	18.62
MTHFD2	1.09368	5.91974	10.3578	8.66428e-14	7.18028e-13	20.9458
HIST1H1C	1.0925	8.64899	6.15735	1.48109e-07	4.17641e-07	6.59208
SERPING1	1.09098	9.86479	5.81738	4.87334e-07	1.27373e-06	5.41151
HNRNPU-AS1	1.09032	8.27512	8.2728	9.04894e-11	4.21598e-10	13.9745
KLF6	1.08972	9.50975	6.44639	5.36067e-08	1.60507e-07	7.60161
FANCL	1.08817	7.84574	11.3153	4.23493e-15	4.68702e-14	23.977
CCNA2	1.08816	4.52635	11.0413	9.92598e-15	1.01116e-13	23.1215
KBTBD8	1.08786	4.00245	8.84551	1.27976e-11	6.92293e-11	15.934
SMC4	1.08767	6.20368	13.6322	4.6389e-18	1.12464e-16	30.822
ATAD2	1.08749	4.49919	12.3616	1.79069e-16	2.83494e-15	27.1541
DOCK2	1.08724	4.8236	9.21923	3.6349e-12	2.16719e-11	17.196
LY6E	1.08669	8.15832	5.81224	4.9616e-07	1.29581e-06	5.39375
CBX7	1.08654	8.81049	14.7087	2.45444e-19	8.5805e-18	33.7707
CMC4	1.08574	8.46435	10.129	1.81308e-13	1.40639e-12	20.2045
CSF1R	1.08564	8.0931	8.09991	1.64269e-10	7.32844e-10	13.3776
ARPC1B	1.08503	9.25835	6.94986	9.1121e-09	3.07277e-08	9.36586
SERPINB9	1.08477	6.22992	8.17536	1.26592e-10	5.76688e-10	13.6384
CDH4	1.08334	4.5616	8.9143	1.01399e-11	5.58555e-11	16.1673
ZAP70	1.0833	5.321	7.3964	1.90062e-09	7.09994e-09	10.9298
PSORS1C1	1.08168	4.06548	11.7594	1.08698e-15	1.41026e-14	25.3429
DUSP5P1	1.0814	3.16672	8.34398	7.08463e-11	3.36492e-10	14.2195
C10orf99	1.08134	4.42831	3.29271	0.00187503	0.00305365	-2.62547
IFNG	1.0809	4.04544	5.33082	2.6386e-06	6.28978e-06	3.74297
PLA1A	1.0796	7.45424	6.38919	6.55585e-08	1.93716e-07	7.40154
HIST1H2BC	1.0791	5.76229	5.82806	4.69479e-07	1.23005e-06	5.44847
MCHR1	1.07742	4.18911	10.0634	2.24301e-13	1.70502e-12	19.9909
IL12RB2	1.07703	4.24773	2.8424	0.00657341	0.00990168	-3.79889
SPON1	1.07692	5.88195	3.65661	0.000637039	0.001107	-1.59911
TRIM5	1.07644	5.16568	21.6166	2.86959e-26	9.04408e-24	49.7081
FOPNL	1.07612	7.52273	14.6651	2.75771e-19	9.51083e-18	33.6539
RAP2B	1.07605	5.26801	11.9502	6.10826e-16	8.53572e-15	25.9217
ATG16L2	1.07544	6.33211	11.0253	1.04359e-14	1.05837e-13	23.0712
MID1	1.07519	7.62966	9.63573	9.10263e-13	6.12e-12	18.585
LOC153684	1.07414	6.74358	8.20634	1.13769e-10	5.23156e-10	13.7453
KCNS3	1.07409	6.65214	7.95568	2.7062e-10	1.16592e-09	12.8781
RFC2	1.07395	6.82319	12.3212	2.018e-16	3.1606e-15	27.0341
TRAT1	1.07348	3.65565	4.06906	0.000176541	0.000330405	-0.36501
LOC100507336	1.07309	4.44379	18.0331	6.39691e-23	7.04554e-21	42.0312
ADCY7	1.07294	5.78943	11.1506	7.05834e-15	7.43813e-14	23.4639
NPDC1	1.07291	7.96813	9.51461	1.35876e-12	8.82548e-12	18.1831
LAG3	1.07265	4.76495	4.57095	3.45635e-05	7.11626e-05	1.21915
AXL	1.07259	7.42405	12.7976	4.99616e-17	9.08175e-16	28.4359
DOK3	1.07244	5.54708	12.5147	1.14077e-16	1.90154e-15	27.6069
NCK1-AS1	1.0718	5.86888	9.49704	1.4403e-12	9.32553e-12	18.1246
GBP3	1.0699	9.19856	3.9779	0.000235585	0.000433348	-0.643579
STK39	1.06982	7.88478	5.19578	4.19676e-06	9.74881e-06	3.28594
ARL5B	1.06821	5.81334	8.68968	2.17233e-11	1.13007e-10	15.4037
SLITRK4	1.06808	5.23014	6.66764	2.46017e-08	7.76206e-08	8.37647
CCR2	1.0673	4.6703	6.63308	2.7785e-08	8.69543e-08	8.25535
NR5A2	1.0664	3.53672	16.0069	8.48959e-21	4.46603e-19	37.1422
ADPRH	1.06625	5.29765	20.2565	4.70939e-25	1.10893e-22	46.9276
CBLN4	1.06565	4.24096	6.05175	2.14553e-07	5.89977e-07	6.22441
CECR1	1.06553	8.65449	4.50506	4.2974e-05	8.74593e-05	1.00674
ZNF826P	1.06519	5.5719	4.89596	1.16459e-05	2.56261e-05	2.28331
CCDC146	1.06319	7.85505	2.60227	0.0123053	0.0177551	-4.3747
VMP1	1.06293	8.3353	5.07661	6.30744e-06	1.43205e-05	2.88528
TRAF3IP2	1.06215	5.60668	13.0391	2.4893e-17	4.87065e-16	29.1354
FCGR2B	1.06199	6.37238	3.82586	0.00037891	0.000678261	-1.10108
KIAA1715	1.06122	6.87767	11.1985	6.08153e-15	6.50242e-14	23.6135
GRB10	1.06108	8.40887	7.46024	1.52009e-09	5.76249e-09	11.1529
NUP85	1.06098	7.73246	12.9952	2.82343e-17	5.47734e-16	29.009
LOC284023	1.06049	5.99623	12.3644	1.7759e-16	2.82024e-15	27.1624
DGCR9	1.06011	5.22091	10.5572	4.57737e-14	4.05588e-13	21.5865
P4HB	1.05897	9.64008	11.8634	7.93483e-16	1.07154e-14	25.659
MCM5	1.05881	6.6945	11.908	6.93651e-16	9.51146e-15	25.794
THSD7B	1.05844	4.52965	5.71831	6.88582e-07	1.76505e-06	5.06944
LIF	1.05729	6.66302	3.67043	0.000610823	0.00106406	-1.55891
VIP	1.05724	3.51149	8.5414	3.60194e-11	1.79755e-10	14.897
RDH13	1.05683	6.47009	7.66917	7.32796e-10	2.93319e-09	11.882
PLEKHG4	1.05664	5.9909	8.66795	2.33909e-11	1.20885e-10	15.3296
RPS3	1.05637	12.3522	15.7718	1.53948e-20	7.61783e-19	36.5461
ETV7	1.05604	4.70702	8.38331	6.18965e-11	2.96403e-10	14.3547
DYRK2	1.05518	6.70243	10.3679	8.38708e-14	6.98162e-13	20.9784
CYTL1	1.05477	4.80992	7.90057	3.27636e-10	1.39021e-09	12.6869
CCDC127	1.0547	6.82027	9.50094	1.42176e-12	9.21422e-12	18.1376
EBF1	1.05292	6.29698	7.11909	5.02671e-09	1.75729e-08	9.95902
DPEP2	1.05217	5.51318	9.11647	5.13046e-12	2.97488e-11	16.8504
EXOSC8	1.05191	8.14192	11.6258	1.6321e-15	2.01295e-14	24.9346
EPHA3	1.05183	3.79374	16.81	1.16263e-21	8.15674e-20	39.1323
ZNF160	1.05127	6.75333	13.4989	6.74056e-18	1.55503e-16	30.4469
IL1RAP	1.05081	4.66002	13.2079	1.53606e-17	3.20445e-16	29.6201
HIST1H2BE	1.05055	6.63476	8.32139	7.65628e-11	3.61397e-10	14.1418
ZSWIM6	1.04984	8.50022	15.0687	9.47201e-20	3.68204e-18	34.7254
SLFN5	1.04899	6.12503	10.1689	1.59332e-13	1.24964e-12	20.3342
ZNF512	1.04785	7.90185	16.6783	1.60348e-21	1.09133e-19	38.8106
TUBA1B	1.04783	10.2798	13.4181	8.46405e-18	1.90334e-16	30.2184
SNAPC1	1.04774	7.16654	6.82485	1.41458e-08	4.61525e-08	8.92757
PTPN12	1.0473	6.50123	12.9919	2.85004e-17	5.51332e-16	28.9996
CDC7	1.04713	5.52365	5.96936	2.86373e-07	7.7386e-07	5.93815
POU5F1P4	1.04644	6.2328	10.4351	6.76051e-14	5.77788e-13	21.1949
CTSE	1.04537	4.90713	5.329	2.65512e-06	6.32695e-06	3.73682
ITPRIP	1.04534	7.06144	8.50918	4.0213e-11	1.98986e-10	14.7867
CXorf21	1.04495	5.84838	9.96455	3.09472e-13	2.28298e-12	19.6678
CASP4	1.04463	6.84968	8.88716	1.11148e-11	6.07841e-11	16.0753
KIAA1586	1.04333	5.49052	10.0159	2.61813e-13	1.95963e-12	19.8356
MT3	1.04305	6.14314	4.16019	0.000131971	0.000251517	-0.0835031
LOC100129034	1.04199	6.17885	13.5764	5.42338e-18	1.28295e-16	30.6652
FDXR	1.04114	5.91172	9.23415	3.45784e-12	2.07006e-11	17.2461
MAP2	1.04088	5.88232	9.59709	1.03417e-12	6.86519e-12	18.457
MAFB	1.04002	9.09781	7.45731	1.53577e-09	5.8155e-09	11.1426
TAPBP	1.03978	6.93036	10.0568	2.29185e-13	1.73635e-12	19.9692
LILRA3	1.03973	5.07322	16.2879	4.20211e-21	2.43865e-19	37.8464
TAGAP	1.03953	4.76798	8.17438	1.27022e-10	5.78261e-10	13.635
STIL	1.03951	5.86353	15.503	3.06319e-20	1.38833e-18	35.8568
GLUL	1.03892	8.00889	10.4595	6.25352e-14	5.37598e-13	21.2732
F2R	1.03842	7.03592	14.6032	3.25381e-19	1.09096e-17	33.488
PPP1R13L	1.03777	6.89519	9.72466	6.79045e-13	4.67751e-12	18.8791
SEC24D	1.03739	4.71842	10.9347	1.38619e-14	1.37053e-13	22.7861
STXBP1	1.03577	8.49074	6.207	1.24408e-07	3.53777e-07	6.76518
LYSMD2	1.03513	8.94479	11.4051	3.21099e-15	3.67899e-14	24.255
LOC643733	1.03498	4.21094	12.8524	4.26284e-17	7.86035e-16	28.5953
VLDLR	1.03459	7.7515	8.67227	2.30491e-11	1.19389e-10	15.3443
CXCL3	1.03412	5.01128	4.1561	0.000133713	0.000254577	-0.0962058
SECTM1	1.03353	6.74833	7.89985	3.28452e-10	1.3931e-09	12.6844
NOD1	1.03322	6.3353	16.3453	3.64327e-21	2.18741e-19	37.9892
MMRN1	1.03282	3.65752	3.62646	0.000698056	0.00120719	-1.68654
ACSL5	1.03257	6.88763	7.18145	4.03819e-09	1.43076e-08	10.1775
TDRD7	1.03246	7.4315	15.7223	1.74636e-20	8.47772e-19	36.4198
PAPD7	1.0321	8.43878	13.7326	3.50597e-18	8.85615e-17	31.103
SAMD9L	1.03202	6.46462	6.93537	9.58843e-09	3.22076e-08	9.31507
ITM2A	1.03173	8.34214	6.62684	2.8402e-08	8.87632e-08	8.23349
LRIG3	1.03143	6.93238	5.52027	1.3708e-06	3.38905e-06	4.38898
ISG15	1.03086	8.3947	6.32591	8.19023e-08	2.38534e-07	7.18035
SNORA72	1.03067	4.64407	8.11526	1.55784e-10	6.97572e-10	13.4307
HYAL2	1.02974	8.42644	9.80773	5.16871e-13	3.63995e-12	19.1529
BCL6	1.02956	7.79903	6.58998	3.23373e-08	1.00282e-07	8.10436
IFIT3	1.02763	8.54808	7.97614	2.52099e-10	1.09348e-09	12.949
FAT4	1.02758	6.69508	7.03646	6.72019e-09	2.30332e-08	9.66943
RNF145	1.0262	6.57334	15.3852	4.15186e-20	1.80968e-18	35.5521
FCGR3B	1.0258	6.48373	5.2688	3.26635e-06	7.69307e-06	3.5327
VSIG1	1.02486	3.60948	10.5023	5.45374e-14	4.76238e-13	21.4106
SPDYE2	1.02361	6.99736	8.61451	2.80629e-11	1.42938e-10	15.1471
SDPR	1.02354	7.62294	5.41166	1.99632e-06	4.83468e-06	4.018
NBPF20	1.02345	6.25341	11.2547	5.10978e-15	5.55916e-14	23.7884
UBE2D2	1.02344	8.17396	15.5488	2.72306e-20	1.25359e-18	35.9747
CSK	1.02319	7.75994	11.6259	1.63169e-15	2.01295e-14	24.9349
ABCA1	1.0224	6.28284	10.3356	9.30404e-14	7.65165e-13	20.8743
LPPR5	1.0221	3.32628	4.75848	1.84995e-05	3.95721e-05	1.82998
DUSP10	1.02175	5.34086	7.7137	6.27465e-10	2.53936e-09	12.0371
PCED1B-AS1	1.02121	3.34041	10.3072	1.01945e-13	8.30728e-13	20.7825
PCSK6	1.02087	4.61785	10.7402	2.55961e-14	2.39435e-13	22.1702
VKORC1	1.02044	9.58796	12.9682	3.05147e-17	5.8587e-16	28.931
CEP120	1.01966	6.31754	11.7478	1.12599e-15	1.45075e-14	25.3075
PCDH12	1.01925	7.64301	9.35028	2.34624e-12	1.45652e-11	17.6351
BTN2A2	1.01896	4.99337	11.5534	2.03629e-15	2.45372e-14	24.7124
UHRF2	1.01812	8.72166	13.0836	2.19085e-17	4.38299e-16	29.2637
FBL	1.01807	9.51076	12.1941	2.94316e-16	4.453e-15	26.6551
APAF1	1.01804	4.95903	22.2684	7.89701e-27	3.11112e-24	50.9877
SLCO2A1	1.01789	8.9088	6.51331	4.23563e-08	1.29009e-07	7.83586
RPF2	1.01789	8.73567	11.9106	6.88167e-16	9.4616e-15	25.802
HTR7P1	1.01757	4.08268	17.9536	7.68831e-23	8.24622e-21	41.8475
ANXA5	1.01705	10.9832	13.5289	6.19632e-18	1.44412e-16	30.5314
ND6	1.01645	8.18036	5.32979	2.64792e-06	6.31126e-06	3.7395
ZNF26	1.01569	6.38963	12.6359	7.99735e-17	1.37791e-15	27.9636
RBM3	1.01531	7.70818	14.7245	2.3535e-19	8.25578e-18	33.8128
TUSC1	1.01513	9.15537	10.4325	6.81792e-14	5.81966e-13	21.1864
LAIR1	1.01509	6.58412	8.69417	2.13933e-11	1.11404e-10	15.419
EXOC3	1.01355	7.69464	7.4902	1.36885e-09	5.23177e-09	11.2576
SERPINE1	1.0129	7.08798	3.56985	0.00082803	0.00141725	-1.84954
FAM89B	1.01241	7.30323	12.7383	5.93508e-17	1.05819e-15	28.263
ANKDD1A	1.01214	5.13478	12.9512	3.20477e-17	6.11863e-16	28.8818
GALNT15	1.01211	6.00933	4.55406	3.65517e-05	7.50149e-05	1.16458
RHOU	1.01169	6.80456	6.30111	8.93683e-08	2.59026e-07	7.09368
MYCT1	1.01152	5.64874	10.297	1.05363e-13	8.55175e-13	20.7494
RPA1	1.01142	7.18195	15.5351	2.82089e-20	1.29281e-18	35.9394
SELL	1.01138	6.56179	4.73131	2.02625e-05	4.31047e-05	1.74091
FAU	1.01128	11.8924	14.3882	5.80347e-19	1.81511e-17	32.9076
MAMDC4	1.00935	6.50446	11.8807	7.53054e-16	1.02642e-14	25.7115
TMEM136	1.00911	5.96101	12.5132	1.14563e-16	1.90808e-15	27.6026
PFKP	1.009	7.70458	11.6343	1.59062e-15	1.96891e-14	24.9605
C3AR1	1.008	8.29745	6.32048	8.3481e-08	2.42856e-07	7.16138
ZBED9	1.00769	5.18715	7.04527	6.51536e-09	2.23949e-08	9.7003
RNF213	1.00768	7.1304	11.9751	5.66749e-16	7.99298e-15	25.997
NAMPT	1.00745	8.33902	5.16707	4.63047e-06	1.06945e-05	3.18918
RASSF5	1.00742	6.05293	6.21679	1.20199e-07	3.42475e-07	6.79934
MX1	1.00738	8.27122	7.45999	1.52141e-09	5.76537e-09	11.152
IGLL5	1.00597	6.68617	3.16598	0.00269481	0.00429551	-2.9672
NOTCH3	1.00585	6.65377	15.0821	9.14433e-20	3.58185e-18	34.7607
HVCN1	1.00557	7.29407	14.4809	4.51906e-19	1.45334e-17	33.1585
MIAT	1.00538	4.88826	7.33971	2.31808e-09	8.54719e-09	10.7315
LRRC69	1.00536	5.35466	10.2465	1.23997e-13	9.9072e-13	20.5859
RACGAP1	1.00511	6.82625	8.42913	5.28954e-11	2.56538e-10	14.5121
IL10	1.00503	4.0247	8.41544	5.54358e-11	2.67844e-10	14.4651
ABCA12	1.00488	3.05045	8.67517	2.28231e-11	1.18308e-10	15.3542
PTPRM	1.00463	9.58484	12.3371	1.92539e-16	3.03879e-15	27.0812
EMILIN2	1.00365	5.03047	16.2561	4.54773e-21	2.60966e-19	37.7672
ELOVL7	1.00362	9.08921	7.08771	5.61254e-09	1.94615e-08	9.84906
CALHM2	1.00343	6.68663	9.91672	3.61768e-13	2.62714e-12	19.511
GAL3ST4	1.00191	6.82599	11.0169	1.07152e-14	1.08347e-13	23.0447
LINC01354	1.00126	3.27544	5.53484	1.30324e-06	3.22989e-06	4.43889
SAMD3	1.00066	3.98021	9.85367	4.44622e-13	3.1737e-12	19.3041
ZC3HAV1L	1.00064	5.57553	12.9157	3.55031e-17	6.70955e-16	28.779
STMN3	1.00061	5.91113	13.0224	2.61149e-17	5.09515e-16	29.0873
SETMAR	-1.00196	5.03897	-17.3872	2.90422e-22	2.4585e-20	40.5195
RNF157-AS1	-1.00231	4.77611	-6.23719	1.11882e-07	3.19935e-07	6.87054
LINC00687	-1.00259	4.48104	-12.4323	1.45332e-16	2.35729e-15	27.3637
FCRLB	-1.00402	6.68547	-6.7624	1.7623e-08	5.67918e-08	8.70864
ATP2C2	-1.00564	4.88664	-14.8864	1.53136e-19	5.61208e-18	34.2438
LOC102723542	-1.00588	5.31517	-7.4073	1.82949e-09	6.85424e-09	10.9678
GDNF	-1.00597	4.97757	-18.5546	1.94167e-23	2.44769e-21	43.2214
GOT2	-1.00716	9.66595	-10.6703	3.19465e-14	2.91908e-13	21.9476
TRPV6	-1.00756	5.0021	-15.8098	1.39771e-20	6.99125e-19	36.6429
FHOD3	-1.0077	7.41212	-5.90523	3.58458e-07	9.55919e-07	5.71567
MYH10	-1.00854	8.2946	-5.14598	4.97698e-06	1.14367e-05	3.11819
STRADB	-1.00951	9.2372	-6.98564	8.0347e-09	2.72515e-08	9.4913
THRSP	-1.01115	4.31155	-7.49622	1.34035e-09	5.12953e-09	11.2786
HPSE2	-1.01262	4.18328	-13.7365	3.46818e-18	8.78233e-17	31.1139
RIMBP2	-1.01272	4.08085	-9.65637	8.50349e-13	5.74547e-12	18.6533
CADM4	-1.01276	5.00409	-13.6448	4.47902e-18	1.09105e-16	30.8572
PRSS35	-1.01294	4.11159	-4.03323	0.000197804	0.000367715	-0.474883
COL4A5	-1.01317	5.24071	-7.91218	3.14698e-10	1.33905e-09	12.7272
RNF43	-1.01447	5.85267	-9.28461	2.9211e-12	1.77783e-11	17.4153
MTCH2	-1.0158	9.44479	-9.7893	5.49095e-13	3.84836e-12	19.0922
NDUFA4	-1.01581	11.5725	-10.7576	2.42234e-14	2.27425e-13	22.2255
HOXA6	-1.01626	5.31462	-10.5182	5.18382e-14	4.54022e-13	21.4615
SKIDA1	-1.01641	4.00257	-11.0073	1.10395e-14	1.11352e-13	23.0147
LOC101926906	-1.01735	4.5773	-5.93839	3.19177e-07	8.5708e-07	5.83067
LOC100289361	-1.01772	6.1101	-15.2001	6.71627e-20	2.72455e-18	35.07
PNPLA1	-1.01965	4.06884	-8.46355	4.70099e-11	2.29899e-10	14.6303
FAM81A	-1.02071	4.81024	-16.6249	1.82743e-21	1.22127e-19	38.6798
AASS	-1.02077	6.05245	-10.7433	2.53413e-14	2.37377e-13	22.1802
RNF126P1	-1.0218	6.13923	-19.3717	3.15425e-24	5.70931e-22	45.0338
SPAG5	-1.02254	7.51216	-4.7335	2.01142e-05	4.28247e-05	1.7481
DNAJC28	-1.02261	4.03617	-16.3156	3.92232e-21	2.31564e-19	37.9153
ZNF488	-1.02301	4.80729	-13.2431	1.38986e-17	2.95054e-16	29.7205
ACOT13	-1.0231	8.47613	-7.30901	2.58146e-09	9.45872e-09	10.6241
AMFR	-1.02543	6.62018	-5.26143	3.35013e-06	7.87773e-06	3.50776
BRINP3	-1.02559	3.10702	-9.8743	4.15583e-13	2.98306e-12	19.3718
CPNE4	-1.02577	3.24731	-14.9116	1.43273e-19	5.30758e-18	34.3105
DSP	-1.02602	9.67964	-3.12861	0.00299491	0.00474507	-3.06634
CPS1	-1.02657	4.39118	-8.57901	3.16772e-11	1.59935e-10	15.0257
RPS6KA6	-1.02686	4.24025	-10.6096	3.87311e-14	3.47079e-13	21.7542
PXMP2	-1.02931	8.70933	-6.80637	1.50963e-08	4.90971e-08	8.86278
MYL3	-1.02979	6.13818	-11.9535	6.04797e-16	8.45725e-15	25.9317
DMGDH	-1.03057	7.01383	-4.3216	7.83635e-05	0.000154287	0.42209
MBOAT2	-1.03185	7.13019	-8.76982	1.65432e-11	8.78218e-11	15.6767
LOC101928894	-1.03216	4.21579	-23.0363	1.79683e-27	9.9486e-25	52.4539
LEFTY1	-1.03246	4.76539	-3.93685	0.000268044	0.000489163	-0.768012
LINC01115	-1.03281	4.04933	-19.9194	9.64273e-25	1.99536e-22	46.2143
SLC12A8	-1.03377	5.29193	-6.827	1.40394e-08	4.58416e-08	8.93509
LINC00671	-1.03416	6.44693	-4.45678	5.03761e-05	0.000101725	0.851895
PCYT2	-1.03488	6.157	-11.5477	2.07218e-15	2.48686e-14	24.6949
ARHGEF3	-1.03489	9.05635	-9.92335	3.54018e-13	2.57635e-12	19.5328
GRAMD1C	-1.03509	8.224	-7.6365	8.21235e-10	3.26043e-09	11.7681
C9orf135	-1.03686	3.61779	-10.087	2.07761e-13	1.58754e-12	20.0677
RBM11	-1.03703	3.39682	-9.99257	2.82455e-13	2.09879e-12	19.7594
FAM3D	-1.03729	5.79523	-13.7654	3.20055e-18	8.21634e-17	31.1945
PDZD3	-1.03888	6.67201	-9.29432	2.82783e-12	1.72568e-11	17.4478
PPP1R1B	-1.03889	5.28254	-11.1285	7.5628e-15	7.90064e-14	23.3946
GAS2	-1.03892	6.5645	-4.64291	2.72169e-05	5.6877e-05	1.45246
LOC100505501	-1.03922	4.87751	-5.59107	1.07213e-06	2.68307e-06	4.63171
CHAC2	-1.04039	5.07526	-9.11558	5.14578e-12	2.98208e-11	16.8474
C9orf173	-1.04173	5.066	-14.562	3.6344e-19	1.20867e-17	33.3771
COL4A3	-1.04182	5.32501	-12.0005	5.25084e-16	7.45969e-15	26.0737
EYA4	-1.04261	4.26187	-8.76139	1.70233e-11	9.02066e-11	15.648
PKLR	-1.04412	6.09249	-5.83995	4.50371e-07	1.18438e-06	5.48961
LOC401068	-1.04413	4.44826	-12.367	1.7627e-16	2.80362e-15	27.1699
RNF180	-1.04688	5.6749	-6.01847	2.41104e-07	6.5769e-07	6.10872
CEACAM1	-1.04715	6.68838	-10.9609	1.27683e-14	1.26976e-13	22.8686
PLLP	-1.04721	8.11256	-7.40336	1.85488e-09	6.94046e-09	10.9541
PCBD1	-1.04727	8.85601	-10.6003	3.9894e-14	3.55953e-13	21.7245
CHDH	-1.048	6.6282	-7.97455	2.5349e-10	1.09812e-09	12.9435
KLHL14	-1.04932	4.42851	-11.6562	1.48757e-15	1.85367e-14	25.0278
LINC00551	-1.05093	3.51928	-5.63871	9.08496e-07	2.29318e-06	4.79538
SUOX	-1.05104	7.45544	-9.86488	4.28604e-13	3.07329e-12	19.3409
AFMID	-1.05169	5.73057	-10.4075	7.38778e-14	6.25139e-13	21.1058
ACAD8	-1.05208	8.00254	-10.053	2.32032e-13	1.75532e-12	19.9568
RELN	-1.05239	5.35295	-5.10615	5.70267e-06	1.30283e-05	2.98435
SLC25A48	-1.05276	5.96064	-7.6822	7.00264e-10	2.81397e-09	11.9274
SERPINB12	-1.05308	4.13663	-19.7808	1.29818e-24	2.58199e-22	45.9182
WNK3	-1.05374	4.50607	-10.5555	4.60127e-14	4.07353e-13	21.5812
TPTEP1	-1.05518	4.56052	-14.5175	4.09518e-19	1.33165e-17	33.2573
GOT1	-1.05523	9.65442	-9.04746	6.4706e-12	3.68418e-11	16.6177
AIFM1	-1.0569	9.27994	-6.6813	2.34468e-08	7.42055e-08	8.42433
APOD	-1.05877	6.29291	-4.20928	0.000112712	0.000216763	0.0693384
C11orf85	-1.05988	4.84781	-11.3291	4.05878e-15	4.51646e-14	24.0196
SLC25A34	-1.05993	6.46048	-8.92913	9.64426e-12	5.3369e-11	16.2176
ODAM	-1.0607	3.83318	-9.4947	1.45151e-12	9.39216e-12	18.1168
SLC15A1	-1.06086	4.38647	-12.0937	3.97226e-16	5.83338e-15	26.3539
MARVELD3	-1.06097	6.11074	-7.78491	4.89707e-10	2.01408e-09	12.2849
SIGIRR	-1.06241	8.07994	-7.86496	3.70746e-10	1.55573e-09	12.5632
BTC	-1.06289	4.25069	-8.88076	1.1358e-11	6.2015e-11	16.0536
DCAF12L1	-1.06297	4.74115	-3.64137	0.000667201	0.00115627	-1.64334
CGN	-1.06388	6.83006	-6.40669	6.16445e-08	1.8273e-07	7.46272
C15orf65	-1.06463	6.09668	-8.7429	1.81266e-11	9.54604e-11	15.5851
ABHD14B	-1.06737	8.90046	-8.05306	1.93154e-10	8.52424e-10	13.2155
IGFALS	-1.0677	5.66662	-15.0708	9.41959e-20	3.67385e-18	34.7309
BRSK1	-1.06772	5.339	-12.7321	6.04303e-17	1.0765e-15	28.2449
PLAT	-1.06839	8.42145	-5.45755	1.70342e-06	4.15926e-06	4.17454
CYP4F11	-1.06868	3.65848	-4.67384	2.45522e-05	5.16556e-05	1.55315
SUCLG2	-1.06891	9.62757	-10.9809	1.19914e-14	1.20067e-13	22.9316
2-Msrx	-1.06892	8.86628	-6.19057	1.31796e-07	3.73958e-07	6.7079
C2orf88	-1.0698	5.89528	-5.46115	1.68232e-06	4.11216e-06	4.18684
BDKRB2	-1.07022	7.10821	-3.85032	0.000351206	0.000631034	-1.0281
FBXO2	-1.0715	4.92902	-19.1142	5.55615e-24	8.89245e-22	44.4695
NR3C2	-1.07262	8.05524	-6.94868	9.15007e-09	3.08456e-08	9.36171
MRPS6	-1.07267	9.79832	-5.00724	7.98742e-06	1.79301e-05	2.65331
AFP	-1.07631	4.83272	-12.804	4.90336e-17	8.94481e-16	28.4548
RAB11FIP4	-1.07664	5.43558	-13.0532	2.39012e-17	4.70355e-16	29.1763
LOC100505942	-1.07811	5.31049	-13.6837	4.01712e-18	9.96304e-17	30.9664
THRB	-1.07836	5.7495	-11.3542	3.75575e-15	4.22748e-14	24.0976
LOC100289019	-1.07843	7.35734	-10.6132	3.82923e-14	3.43759e-13	21.7657
NPNT	-1.07923	6.52243	-5.48904	1.52745e-06	3.75511e-06	4.28215
NAGS	-1.07942	6.37955	-5.8932	3.73875e-07	9.94647e-07	5.67396
ST6GALNAC3	-1.08133	6.60947	-5.74624	6.24686e-07	1.61053e-06	5.16578
SLC25A33	-1.08133	7.92269	-7.91813	3.08266e-10	1.31511e-09	12.7478
USP44	-1.08139	3.65605	-12.6699	7.24382e-17	1.26295e-15	28.0629
CYSTM1	-1.08197	11.2793	-10.8038	2.09341e-14	1.99249e-13	22.3721
CYS1	-1.0821	9.55545	-9.86069	4.3452e-13	3.11353e-12	19.3271
PLA2G4F	-1.08222	5.80626	-12.0611	4.37829e-16	6.37482e-15	26.2562
HSD17B2	-1.08459	4.41517	-4.62088	2.92867e-05	6.08981e-05	1.38087
MISP	-1.08575	7.12919	-11.0425	9.89e-15	1.00849e-13	23.1251
PDZK1IP1	-1.08616	11.5536	-5.2257	3.78753e-06	8.84677e-06	3.38693
CUBN	-1.08642	10.358	-3.09889	0.00325567	0.00513003	-3.14461
MROH7	-1.08728	5.35026	-11.7843	1.00816e-15	1.32223e-14	25.4185
AMELY	-1.08764	4.33782	-18.8665	9.63422e-24	1.39976e-21	43.9206
MYO3B	-1.08772	3.59288	-6.7734	1.69539e-08	5.47301e-08	8.74719
GPR27	-1.08837	6.10751	-7.48645	1.38693e-09	5.29199e-09	11.2445
PGAM2	-1.08953	4.65375	-8.72355	1.93593e-11	1.01405e-10	15.5191
NKAIN4	-1.09	5.52418	-5.60196	1.03234e-06	2.58888e-06	4.66908
LHX1	-1.0902	5.35671	-11.8155	9.17142e-16	1.21864e-14	25.5135
REM2	-1.09077	4.77935	-21.709	2.38533e-26	8.01078e-24	49.8915
ACSM2B	-1.09351	7.48961	-3.41366	0.00131764	0.00219208	-2.29149
BMP7	-1.09438	4.99389	-19.2627	4.00576e-24	6.83851e-22	44.7956
BEX1	-1.09468	7.08721	-2.88617	0.00584424	0.00887378	-3.69001
HOXB8	-1.09636	4.78392	-7.10897	5.20865e-09	1.81501e-08	9.92355
INSC	-1.0966	3.34128	-7.81082	4.47505e-10	1.85054e-09	12.375
BRE-AS1	-1.09671	7.09337	-4.17927	0.000124133	0.000237507	-0.024196
ACOT8	-1.09705	6.04647	-14.9164	1.41441e-19	5.25874e-18	34.3234
FLJ22184	-1.09767	5.16826	-17.3304	3.3237e-22	2.75665e-20	40.3846
ATP6	-1.09867	11.3532	-16.4074	3.12292e-21	1.90974e-19	38.1435
SERPINA10	-1.10012	5.13773	-15.7307	1.70941e-20	8.37775e-19	36.4412
TBC1D24	-1.10031	6.80266	-6.26019	1.03193e-07	2.96206e-07	6.95082
TMEM132E	-1.1004	5.94667	-9.22261	3.59406e-12	2.14581e-11	17.2073
ATOH7	-1.10151	4.69624	-10.0917	2.04613e-13	1.56703e-12	20.0831
F11	-1.10173	3.58607	-13.766	3.19488e-18	8.21629e-17	31.1963
GCDH	-1.10192	7.36142	-8.31683	7.77746e-11	3.66337e-10	14.1261
BCKDHB	-1.10213	6.68089	-11.3878	3.38657e-15	3.85858e-14	24.2015
KLK11	-1.10274	4.83312	-21.7371	2.25516e-26	7.69986e-24	49.9472
PON3	-1.10283	5.9547	-6.73391	1.94823e-08	6.24103e-08	8.60876
BCAS1	-1.10285	4.94693	-14.0309	1.53652e-18	4.2943e-17	31.9308
PTPN20B	-1.10439	4.26189	-3.5236	0.000951106	0.00161589	-1.98161
HS3ST3A1	-1.10502	4.28234	-9.66034	8.3929e-13	5.67449e-12	18.6665
HOXA7	-1.10628	7.0911	-6.60289	3.09e-08	9.61302e-08	8.1496
FSD2	-1.10698	4.55504	-23.3117	1.0673e-27	6.43083e-25	52.9691
GAS1	-1.10757	5.7053	-8.5809	3.14729e-11	1.59042e-10	15.0322
PLEKHA6	-1.10928	6.64749	-11.9185	6.71958e-16	9.26362e-15	25.8259
CORT	-1.11036	4.37212	-14.3237	6.9109e-19	2.10994e-17	32.7324
LOC644090	-1.11547	5.77441	-5.72502	6.72656e-07	1.7272e-06	5.09258
MAP9	-1.11555	6.26055	-6.83629	1.35874e-08	4.44652e-08	8.96769
SIX4	-1.1157	3.72554	-22.0168	1.2948e-26	4.82279e-24	50.4976
COL28A1	-1.11655	3.833	-10.3169	9.88147e-14	8.07144e-13	20.8138
ACMSD	-1.11792	9.68875	-3.45933	0.00115147	0.001931	-2.16348
UCA1	-1.11822	5.0773	-10.2194	1.3532e-13	1.07282e-12	20.4982
ADTRP	-1.11856	5.04238	-6.80705	1.50604e-08	4.89959e-08	8.86516
HACL1	-1.11988	8.06854	-11.1344	7.42422e-15	7.77967e-14	23.4132
NNAT	-1.12062	5.21625	-18.5403	2.00535e-23	2.50498e-21	43.1892
C20orf181	-1.12076	4.82242	-20.9224	1.175e-25	3.25284e-23	48.3081
HBQ1	-1.12105	4.9879	-15.3442	4.61793e-20	1.96272e-18	35.4454
RASSF8-AS1	-1.12237	6.33218	-9.96175	3.12315e-13	2.3023e-12	19.6586
GPHN	-1.12271	6.9873	-9.65187	8.63051e-13	5.81977e-12	18.6385
APEH	-1.12415	6.67897	-15.1516	7.62304e-20	3.05608e-18	34.9431
GREB1	-1.12423	3.8417	-21.521	3.47716e-26	1.07929e-23	49.5175
GDPD3	-1.12545	6.84842	-6.80078	1.53964e-08	5.00494e-08	8.84317
MSRA	-1.12673	6.71143	-9.46239	1.6158e-12	1.03571e-11	18.0092
BBOX1	-1.12764	11.2815	-4.42555	5.58132e-05	0.000112097	0.7521
GCAT	-1.12853	7.1287	-9.77018	5.84662e-13	4.07394e-12	19.0293
CLDN10-AS1	-1.12928	3.24091	-18.2896	3.54682e-23	4.22442e-21	42.6201
NQO2	-1.13062	8.25901	-7.07374	5.89484e-09	2.03886e-08	9.80012
RASL11B	-1.13073	5.74237	-10.5341	4.92638e-14	4.33513e-13	21.5127
RAPGEF3	-1.13252	6.44748	-10.4695	6.05692e-14	5.21792e-13	21.3052
TUBB2A	-1.13344	9.46835	-7.11783	5.04899e-09	1.76387e-08	9.95461
ITPR1-AS1	-1.13411	4.84246	-7.09102	5.54761e-09	1.92559e-08	9.86067
BTD	-1.13516	6.03735	-12.7997	4.96603e-17	9.035e-16	28.442
SLC19A3	-1.13632	4.16954	-10.9255	1.42685e-14	1.40667e-13	22.757
SSPO	-1.13637	6.28925	-20.9426	1.1273e-25	3.16354e-23	48.3493
IDH1	-1.13639	8.59609	-9.66661	8.22101e-13	5.56746e-12	18.6872
EML6	-1.13651	4.91265	-7.92633	2.99622e-10	1.28197e-09	12.7763
SPHK2	-1.13663	6.63763	-12.3328	1.94978e-16	3.0686e-15	27.0686
LOC100507419	-1.1377	3.83121	-21.7557	2.17306e-26	7.5453e-24	49.984
EPB41L5	-1.13795	6.52724	-9.72815	6.713e-13	4.62892e-12	18.8906
CLDN14	-1.13905	5.7436	-9.38717	2.07493e-12	1.3015e-11	17.7583
SEMA6D	-1.1407	5.51954	-8.17566	1.26464e-10	5.76234e-10	13.6394
ASGR2	-1.14187	6.13323	-13.8079	2.84374e-18	7.40239e-17	31.3131
ARHGAP24	-1.14244	8.02259	-12.0885	4.03395e-16	5.90704e-15	26.3384
FLJ31715	-1.14267	5.43542	-13.8781	2.34142e-18	6.22938e-17	31.5082
CCL11	-1.14292	4.91336	-7.30037	2.66078e-09	9.71808e-09	10.5938
HAGH	-1.1432	8.89604	-9.65364	8.58019e-13	5.79156e-12	18.6443
NOS1	-1.14415	4.70665	-24.1694	2.17714e-28	1.65189e-25	54.5397
GIPR	-1.14481	5.25641	-22.7616	3.03676e-27	1.51734e-24	51.9345
GRAMD1B	-1.14594	7.16048	-8.59607	2.98851e-11	1.51767e-10	15.0841
C8B	-1.14631	4.18914	-18.1171	5.26976e-23	5.89925e-21	42.2247
FOLR3	-1.14718	5.22682	-8.08082	1.75471e-10	7.7841e-10	13.3116
RPRM	-1.14821	4.45213	-12.9125	3.58342e-17	6.75967e-16	28.7697
ADARB2-AS1	-1.14884	5.83698	-17.4752	2.35734e-22	2.03766e-20	40.728
FLJ90680	-1.14908	4.56573	-16.2252	4.9118e-21	2.79508e-19	37.6901
C6orf123	-1.15072	4.41213	-9.61024	9.90199e-13	6.59897e-12	18.5005
RHOBTB3	-1.15155	6.66147	-5.91663	3.44444e-07	9.20704e-07	5.75518
KLHDC9	-1.15329	8.04844	-15.0703	9.433e-20	3.67385e-18	34.7295
CHODL	-1.15698	5.53613	-3.98269	0.000232058	0.000427206	-0.62903
DNASE1	-1.15803	5.20526	-12.5959	8.98995e-17	1.5271e-15	27.8461
SDSL	-1.15829	7.07792	-8.31691	7.77525e-11	3.66337e-10	14.1264
AQP3	-1.15976	8.71748	-7.29773	2.68552e-09	9.80147e-09	10.5846
C1orf210	-1.16115	6.37367	-7.6908	6.79593e-10	2.73734e-09	11.9573
PAQR5	-1.16148	8.05879	-8.45728	4.80306e-11	2.34554e-10	14.6088
CRISP2	-1.16198	3.35809	-11.0865	8.61914e-15	8.91326e-14	23.2633
TM7SF2	-1.16216	7.35012	-10.7961	2.14457e-14	2.03491e-13	22.3478
MST1	-1.16232	9.32633	-7.96393	2.6299e-10	1.13495e-09	12.9067
AHCY	-1.16236	9.53242	-9.63521	9.11831e-13	6.12653e-12	18.5833
TSPAN33	-1.16481	8.65014	-7.36651	2.11039e-09	7.83071e-09	10.8252
SLC25A25	-1.16544	7.1421	-7.41189	1.80033e-09	6.74744e-09	10.9839
SLC2A2	-1.16632	7.33866	-3.38306	0.0014415	0.00238361	-2.37668
SYPL2	-1.16679	6.71092	-9.68314	7.78519e-13	5.30211e-12	18.7419
FAM171A1	-1.16718	9.13949	-8.62523	2.70562e-11	1.38401e-10	15.1837
SYNGR3	-1.16842	4.47023	-4.79087	1.65936e-05	3.57265e-05	1.9364
SLC30A8	-1.17135	4.09945	-11.2439	5.28236e-15	5.72563e-14	23.755
EPB41L4B	-1.17207	4.37408	-12.314	2.06166e-16	3.21915e-15	27.0126
PHYHIP	-1.17369	4.95908	-15.5409	2.77889e-20	1.27642e-18	35.9544
SLC16A2	-1.17689	7.14837	-7.14882	4.52834e-09	1.59394e-08	10.0632
C15orf59	-1.1771	4.78046	-9.45986	1.62942e-12	1.04313e-11	18.0008
DLGAP2	-1.17725	4.2652	-12.6423	7.85064e-17	1.3572e-15	27.9821
FRMD7	-1.17754	3.81723	-14.0475	1.46827e-18	4.12606e-17	31.9764
VWA8	-1.17835	7.23822	-13.0795	2.21662e-17	4.41728e-16	29.2519
C8orf4	-1.17869	9.1411	-4.04527	0.000190396	0.000354647	-0.438015
FDX1	-1.18121	8.40681	-12.6136	8.53645e-17	1.45975e-15	27.898
COL4A4	-1.18155	5.98324	-9.16547	4.35251e-12	2.56002e-11	17.0153
PNMAL1	-1.18283	6.87899	-3.88764	0.000312664	0.000565235	-0.916288
LONRF2	-1.18308	4.7407	-5.49235	1.51003e-06	3.71452e-06	4.29347
LOC284798	-1.18416	5.22448	-23.5071	7.39826e-28	4.67389e-25	53.3315
LINC01314	-1.18553	5.35983	-13.5249	6.26603e-18	1.4587e-16	30.5202
AKR1A1	-1.18559	10.9252	-8.20913	1.12677e-10	5.18601e-10	13.7549
PLEKHA5	-1.1863	7.27097	-7.82962	4.19187e-10	1.74294e-09	12.4404
SLC25A10	-1.18894	6.44965	-8.97267	8.32565e-12	4.66264e-11	16.3649
SLC16A5	-1.18974	6.80942	-4.94649	9.81574e-06	2.18239e-05	2.451
PRSS8	-1.19066	7.17876	-6.71316	2.09588e-08	6.67437e-08	8.53601
ZYG11A	-1.19083	5.20389	-6.92213	1.00456e-08	3.36266e-08	9.26864
IPO13	-1.19187	7.34573	-13.6646	4.23704e-18	1.04453e-16	30.9129
DHRS4-AS1	-1.19366	5.90734	-14.2143	9.30531e-19	2.71551e-17	32.434
SMTNL2	-1.19496	7.86271	-7.74706	5.58647e-10	2.27614e-09	12.1532
LINC00845	-1.19591	3.82172	-11.1391	7.31748e-15	7.67568e-14	23.4277
NAT8B	-1.19681	7.73036	-3.89908	0.000301688	0.000546839	-0.881891
LINC01159	-1.19871	6.23807	-7.50365	1.306e-09	5.00742e-09	11.3045
ITLN1	-1.20051	4.24404	-5.08971	6.03166e-06	1.37355e-05	2.92922
ACSM3	-1.20176	7.69404	-6.02723	2.33809e-07	6.38982e-07	6.13918
BSPRY	-1.20242	6.38863	-7.60008	9.32502e-10	3.6737e-09	11.6411
CNTN1	-1.2025	4.26865	-10.9798	1.20343e-14	1.20379e-13	22.9281
APOC3	-1.20313	4.74261	-10.8188	1.99634e-14	1.90929e-13	22.4198
PLA2G12B	-1.20342	6.12858	-5.46353	1.66851e-06	4.07986e-06	4.19497
PHACTR3	-1.2036	4.2764	-6.54717	3.75972e-08	1.1544e-07	7.95442
FOLH1B	-1.20536	6.81812	-4.51913	4.10238e-05	8.36315e-05	1.05201
RAP1GAP	-1.2058	6.76331	-10.2976	1.05159e-13	8.53857e-13	20.7513
SYT6	-1.20832	5.59288	-7.81532	4.40552e-10	1.824e-09	12.3907
GCH1	-1.2093	8.80754	-6.51121	4.26702e-08	1.29868e-07	7.82852
CTSH	-1.21014	11.4007	-10.8849	1.62132e-14	1.57863e-13	22.6287
SLC52A3	-1.21031	5.93271	-14.9301	1.36414e-19	5.08106e-18	34.3597
RNF2	-1.21082	5.45355	-24.2572	1.85541e-28	1.46192e-25	54.6976
SIM2	-1.2118	4.79607	-9.94234	3.32729e-13	2.437e-12	19.595
HSD3B2	-1.21374	4.39589	-11.6172	1.67545e-15	2.06517e-14	24.9083
CRYL1	-1.21635	10.2459	-8.25727	9.54601e-11	4.42943e-10	13.9209
COL9A3	-1.21769	5.01773	-7.07338	5.90245e-09	2.04046e-08	9.79883
FOXC1	-1.21867	8.09669	-7.77478	5.0727e-10	2.08005e-09	12.2497
HYAL1	-1.21944	8.34553	-8.55158	3.47883e-11	1.74035e-10	14.9319
C1orf194	-1.22131	4.25759	-17.6767	1.46663e-22	1.39099e-20	41.2023
LINC01431	-1.22169	3.81779	-18.6585	1.53572e-23	2.02434e-21	43.4555
FTCD	-1.2222	7.80824	-5.76542	5.84261e-07	1.5124e-06	5.23197
ENPP1	-1.22265	4.74696	-10.8145	2.02409e-14	1.93403e-13	22.4059
ZNF300P1	-1.22312	5.86163	-5.26886	3.26565e-06	7.69232e-06	3.53291
EVPL	-1.22488	6.03989	-16.04	7.81133e-21	4.14567e-19	37.2256
GLTPD2	-1.22536	4.98445	-8.26352	9.34278e-11	4.34399e-10	13.9425
LOC100507564	-1.22564	4.38775	-17.8937	8.83474e-23	8.94926e-21	41.7087
SLC19A2	-1.22592	7.37778	-6.15431	1.49701e-07	4.21723e-07	6.58147
ALX1	-1.22595	4.53952	-7.84305	4.00068e-10	1.66921e-09	12.4871
C15orf27	-1.22626	4.30682	-18.476	2.31999e-23	2.86309e-21	43.0438
CYP4F12	-1.22641	6.45884	-9.54292	1.23716e-12	8.10761e-12	18.2771
UNC5D	-1.2278	5.34757	-4.9174	1.08315e-05	2.39523e-05	2.3544
ENOX1	-1.23226	5.674	-11.1416	7.26082e-15	7.62405e-14	23.4355
LOC101929243	-1.23231	6.44689	-19.3315	3.44462e-24	6.13622e-22	44.946
CYB5R2	-1.23369	4.71879	-7.66446	7.44928e-10	2.97768e-09	11.8656
EPHX2	-1.23394	9.36705	-6.2585	1.03811e-07	2.9781e-07	6.94489
HOXA2	-1.23617	4.55498	-13.0512	2.40426e-17	4.72244e-16	29.1703
CYP39A1	-1.23619	5.10531	-8.80005	1.49302e-11	7.99424e-11	15.7795
CMTM4	-1.2377	7.73191	-11.6746	1.40686e-15	1.76275e-14	25.0838
PPM1E	-1.23808	4.11953	-10.31	1.01031e-13	8.23937e-13	20.7915
CASR	-1.23857	5.2019	-18.4391	2.52286e-23	3.09481e-21	42.9601
SULT1C2	-1.24065	8.32343	-8.31243	7.89576e-11	3.71268e-10	14.111
SLC4A4	-1.24076	8.02308	-4.52276	4.05356e-05	8.26857e-05	1.06369
LOC100506125	-1.2411	4.39164	-17.6896	1.42279e-22	1.36202e-20	41.2326
SLC23A3	-1.24119	7.37367	-4.75964	1.84273e-05	3.94217e-05	1.8338
PPP2R2B	-1.24175	4.47607	-16.5103	2.42213e-21	1.548e-19	38.3978
GPX3	-1.24222	13.2902	-7.49713	1.33611e-09	5.11714e-09	11.2818
AGR2	-1.2439	4.72582	-5.46466	1.662e-06	4.0649e-06	4.19883
SERPINA6	-1.24523	7.93248	-4.89466	1.16974e-05	2.57283e-05	2.27898
SBSN	-1.24537	3.85981	-21.1573	7.26248e-26	2.15622e-23	48.7861
CYP3A7-CYP3AP1	-1.24543	7.13483	-6.19064	1.31766e-07	3.73923e-07	6.70814
C10orf126	-1.25103	3.80927	-9.90024	3.81789e-13	2.75787e-12	19.457
DEPDC7	-1.25221	7.85893	-4.35089	7.12384e-05	0.000141004	0.51473
FMN2	-1.25853	4.1052	-17.9064	8.57822e-23	8.92048e-21	41.7381
MAGI2-AS3	-1.26498	5.61532	-8.56609	3.3106e-11	1.66268e-10	14.9815
VDR	-1.26547	6.52595	-9.04293	6.57006e-12	3.73665e-11	16.6024
LIPH	-1.26965	4.63615	-12.1502	3.35536e-16	5.01737e-15	26.5234
HIGD1A	-1.27252	9.33058	-7.46277	1.50669e-09	5.71806e-09	11.1617
ABHD17C	-1.27329	6.93738	-7.94027	2.85477e-10	1.22657e-09	12.8246
TSPAN1	-1.27437	9.65818	-4.67261	2.46524e-05	5.18457e-05	1.54917
FGFBP1	-1.27521	5.32826	-21.6894	2.48076e-26	8.19361e-24	49.8526
LHPP	-1.27644	7.02937	-8.56028	3.37692e-11	1.69267e-10	14.9616
SLC6A20	-1.27893	4.44038	-8.00767	2.26015e-10	9.87448e-10	13.0583
C5	-1.28118	6.19007	-9.35897	2.27928e-12	1.41796e-11	17.6641
PROM2	-1.28191	5.83998	-15.742	1.66099e-20	8.1796e-19	36.47
SH3BGR	-1.28219	6.08866	-12.2501	2.49209e-16	3.82421e-15	26.8221
SLC25A5-AS1	-1.28225	4.89534	-16.1901	5.3626e-21	2.99341e-19	37.6022
DPP6	-1.28323	4.81744	-13.4765	7.17967e-18	1.64338e-16	30.3836
GABRB2	-1.28374	4.4573	-10.1338	1.78491e-13	1.38568e-12	20.2202
C1orf226	-1.28479	5.51563	-8.83912	1.30776e-11	7.05429e-11	15.9123
SERPINA4	-1.28522	5.61853	-10.8359	1.89171e-14	1.81686e-13	22.4738
ZMYND12	-1.28592	6.42733	-9.59255	1.04981e-12	6.95102e-12	18.4419
UQCRC1	-1.29265	9.93908	-11.8399	8.51866e-16	1.14061e-14	25.5877
AIF1L	-1.29344	8.26102	-8.84074	1.30064e-11	7.02229e-11	15.9177
GLYCTK	-1.29688	6.58327	-13.5142	6.45682e-18	1.49971e-16	30.4901
HTR5A	-1.29885	4.25439	-25.6101	1.67492e-29	2.01838e-26	57.067
CPNE6	-1.3009	5.57925	-9.41106	1.91633e-12	1.21092e-11	17.8381
SLC39A5	-1.3021	7.72984	-6.23234	1.13809e-07	3.25173e-07	6.85358
PROX1	-1.30513	4.64381	-6.85978	1.25096e-08	4.12211e-08	9.05004
CHRM3-AS2	-1.30638	3.64529	-13.7192	3.63873e-18	9.14639e-17	31.0657
LOC645321	-1.30783	4.79004	-16.0644	7.34706e-21	3.95044e-19	37.287
PIP	-1.31341	5.37513	-22.6221	3.97241e-27	1.84952e-24	51.6685
TYRO3	-1.31508	5.25865	-13.7777	3.09301e-18	7.98028e-17	31.2288
GPD1	-1.31545	6.24538	-9.69798	7.4137e-13	5.06933e-12	18.791
TNNC1	-1.31599	4.84179	-7.93381	2.91946e-10	1.25148e-09	12.8022
GPD1L	-1.31716	8.50632	-11.292	4.55185e-15	4.9946e-14	23.9045
ZNF429	-1.31785	5.19385	-31.5961	1.30838e-33	6.70089e-30	66.2986
GLOD5	-1.31892	4.20795	-17.3773	2.9727e-22	2.48566e-20	40.4962
PANK1	-1.31929	8.99746	-6.64656	2.64964e-08	8.32012e-08	8.30262
KMO	-1.31998	7.82414	-5.15211	4.87365e-06	1.12102e-05	3.13883
ADH1B	-1.32152	6.2306	-4.87992	1.22944e-05	2.69661e-05	2.23018
IGSF5	-1.32305	3.61223	-14.2433	8.59869e-19	2.53822e-17	32.5132
COBLL1	-1.32478	6.06563	-8.6776	2.2635e-11	1.17422e-10	15.3625
RENBP	-1.32536	6.00599	-7.50156	1.31559e-09	5.04136e-09	11.2972
ZNF667-AS1	-1.32553	7.54392	-5.66786	8.20856e-07	2.08377e-06	4.89567
LOC100505853	-1.32556	5.15231	-27.5872	6.03635e-31	1.12419e-27	60.3278
APOO	-1.32652	8.04814	-10.4854	5.75689e-14	4.98671e-13	21.3563
SMLR1	-1.32741	4.57886	-8.19131	1.19816e-10	5.48748e-10	13.6934
MRAP2	-1.32951	5.29998	-8.98402	8.01294e-12	4.49612e-11	16.4033
SORCS1	-1.33021	4.53013	-5.80309	5.12262e-07	1.33514e-06	5.36213
HGD	-1.3309	7.66154	-8.71763	1.97527e-11	1.03255e-10	15.499
PAK6	-1.33116	5.20326	-12.91	3.60897e-17	6.79601e-16	28.7625
TRIM71	-1.33118	5.44721	-6.58425	3.29959e-08	1.02216e-07	8.0843
SLC9A2	-1.33358	4.1312	-11.9482	6.14546e-16	8.57018e-15	25.9156
SNRK-AS1	-1.33498	5.10702	-9.85726	4.3943e-13	3.14541e-12	19.3158
RNF152	-1.33696	4.3459	-9.07472	5.90341e-12	3.38286e-11	16.7097
GPC3	-1.33696	5.04536	-15.1313	8.04058e-20	3.20465e-18	34.8896
MPP7	-1.3406	4.70126	-12.6225	8.31729e-17	1.42823e-15	27.9242
BSN	-1.34083	4.13112	-20.2675	4.60144e-25	1.09611e-22	46.9507
SGK2	-1.34393	7.14022	-10.29	1.07753e-13	8.73535e-13	20.7269
BTBD11	-1.34438	4.91182	-8.86856	1.18368e-11	6.44403e-11	16.0122
PNP	-1.34683	9.82115	-10.8609	1.7485e-14	1.68802e-13	22.5529
F5	-1.34761	5.22355	-5.86876	4.07228e-07	1.07714e-06	5.58932
MUM1L1	-1.34994	5.45474	-4.96011	9.37291e-06	2.08869e-05	2.4963
KCNK10	-1.35141	4.53343	-16.6243	1.83017e-21	1.22127e-19	38.6783
SCN7A	-1.35333	3.4459	-15.3621	4.40788e-20	1.89706e-18	35.4921
TRPM6	-1.35381	4.55411	-10.5149	5.23863e-14	4.58235e-13	21.451
ALDH2	-1.35517	10.7322	-11.8945	7.2238e-16	9.87237e-15	25.7533
SUCLG1	-1.35783	7.67993	-12.3711	1.74113e-16	2.77795e-15	27.1823
ESRRB	-1.3593	4.87223	-15.1269	8.13205e-20	3.23482e-18	34.8783
TPD52L1	-1.35943	7.79857	-5.89547	3.70913e-07	9.87848e-07	5.68184
KCNJ15	-1.36063	8.61392	-8.20399	1.14691e-10	5.26807e-10	13.7372
CALML3	-1.36183	4.5573	-15.6452	2.1268e-20	1.01561e-18	36.2223
BSND	-1.36206	5.37941	-11.3519	3.78227e-15	4.25266e-14	24.0905
TINAG	-1.36657	7.77697	-5.39423	2.12019e-06	5.11352e-06	3.95862
LRRN2	-1.36723	4.24341	-21.9269	1.54655e-26	5.6576e-24	50.3214
COPG2IT1	-1.36748	5.37765	-10.0648	2.23327e-13	1.69926e-12	19.9952
APOE	-1.3681	10.1083	-5.65177	8.68136e-07	2.1959e-06	4.8403
MST1L	-1.36832	5.62522	-6.90653	1.06123e-08	3.53615e-08	9.21395
MAOA	-1.36944	8.47886	-5.00973	7.91999e-06	1.77885e-05	2.66164
ALS2CL	-1.37014	6.57048	-10.6787	3.11006e-14	2.84941e-13	21.9746
EIF5A2	-1.37021	4.7077	-14.5535	3.71775e-19	1.23233e-17	33.3543
DCN	-1.37239	6.69355	-5.85782	4.23111e-07	1.11656e-06	5.55143
PBLD	-1.37683	9.91607	-5.48364	1.55629e-06	3.82004e-06	4.26369
ANKS4B	-1.37878	5.26965	-9.87844	4.10001e-13	2.94505e-12	19.3854
TNFSF15	-1.3825	6.45559	-6.00773	2.50354e-07	6.81833e-07	6.07139
SDC1	-1.38264	9.39378	-6.55719	3.62939e-08	1.11639e-07	7.98951
ARSF	-1.38324	6.07981	-8.64024	2.57062e-11	1.31885e-10	15.235
PAPPA2	-1.38508	5.21304	-12.1786	3.08297e-16	4.64395e-15	26.6085
LINC00472	-1.38775	6.63448	-8.04208	2.00632e-10	8.82952e-10	13.1775
ITIH2	-1.3884	4.58941	-20.0907	6.69073e-25	1.45815e-22	46.5781
CA4	-1.3884	7.54925	-5.72123	6.81594e-07	1.74867e-06	5.07953
CLCN5	-1.39008	7.27023	-9.17828	4.16944e-12	2.45799e-11	17.0584
KLK7	-1.39086	5.63332	-12.608	8.67804e-17	1.47902e-15	27.8815
CYFIP2	-1.39142	9.65511	-9.22258	3.5944e-12	2.14581e-11	17.2072
HRSP12	-1.39298	8.55669	-7.63051	8.38557e-10	3.32276e-09	11.7472
RORB	-1.39363	3.75691	-11.6905	1.34004e-15	1.69248e-14	25.1327
HPCAL4	-1.39639	4.73668	-13.3758	9.53859e-18	2.11216e-16	30.0984
ECI2	-1.39715	10.2232	-10.2254	1.32742e-13	1.05361e-12	20.5175
ALAD	-1.39822	7.61251	-10.6712	3.18483e-14	2.9114e-13	21.9507
IRX2	-1.39848	5.69521	-10.5255	5.0647e-14	4.45302e-13	21.4849
VAT1L	-1.40098	5.53059	-4.19553	0.000117815	0.000225989	0.0264189
FLJ37786	-1.40284	3.37756	-7.38397	1.98517e-09	7.39019e-09	10.8863
OR7E14P	-1.40955	6.16118	-7.377	2.03422e-09	7.5577e-09	10.8619
STK33	-1.41006	4.93875	-8.08227	1.74592e-10	7.75184e-10	13.3166
OAT	-1.41105	10.7269	-12.1373	3.48613e-16	5.19773e-15	26.485
MT2A	-1.41142	11.5592	-6.94968	9.11779e-09	3.07418e-08	9.36523
TBATA	-1.41376	4.44419	-24.7729	7.31992e-29	6.24816e-26	55.6148
AMDHD1	-1.41497	6.8616	-5.66053	8.42072e-07	2.1334e-06	4.87044
OXCT1	-1.41646	8.6512	-8.32889	7.46157e-11	3.52982e-10	14.1676
GALM	-1.41676	8.6479	-9.78698	5.53282e-13	3.87506e-12	19.0846
LOC100499194	-1.42037	4.85071	-25.9802	8.84314e-30	1.13225e-26	57.695
LOC101930114	-1.42055	5.92218	-13.3634	9.87997e-18	2.18105e-16	30.0631
AGMAT	-1.42271	7.29712	-7.35244	2.21698e-09	8.19949e-09	10.776
KCNH6	-1.42334	4.27108	-15.8967	1.12131e-20	5.71419e-19	36.8636
KIF23	-1.4246	4.43474	-12.0487	4.5448e-16	6.59382e-15	26.2187
TCL6	-1.42471	4.73749	-16.2989	4.08791e-21	2.38589e-19	37.874
LOC100505938	-1.42551	5.03274	-13.7015	3.82352e-18	9.55227e-17	31.016
LOC102723886	-1.42783	4.3392	-13.4271	8.25234e-18	1.85982e-16	30.2438
ACOT6	-1.42814	4.09554	-12.9402	3.30828e-17	6.29279e-16	28.8499
HECW1	-1.42847	4.76815	-12.4499	1.37993e-16	2.24894e-15	27.4158
FHIT	-1.4286	6.76563	-10.2991	1.04658e-13	8.508e-13	20.7561
PEG3	-1.43254	5.37766	-6.14999	1.51987e-07	4.27692e-07	6.56643
FUT6	-1.43889	6.88492	-8.0813	1.75183e-10	7.77469e-10	13.3132
FAM83B	-1.44072	3.62025	-12.11	3.78298e-16	5.60768e-15	26.403
TLCD1	-1.44425	5.45052	-13.4024	8.8477e-18	1.97875e-16	30.1739
PRDM16	-1.44563	4.73945	-9.44064	1.73688e-12	1.10537e-11	17.9367
FREM2	-1.44884	8.19765	-8.95572	8.81587e-12	4.91701e-11	16.3076
OLIG1	-1.45062	4.89395	-4.08004	0.000170483	0.000319945	-0.331261
CCDC160	-1.45175	3.92626	-10.6448	3.46409e-14	3.13867e-13	21.8663
CAPSL	-1.45185	4.04988	-22.1433	1.0092e-26	3.82862e-24	50.7446
HOXB-AS3	-1.45785	4.69109	-12.5417	1.05392e-16	1.77117e-15	27.6864
CDH16	-1.4628	10.0802	-9.92309	3.54315e-13	2.57759e-12	19.5319
ACAA1	-1.46358	9.49033	-11.2888	4.59794e-15	5.03977e-14	23.8944
UGT3A1	-1.46904	6.68075	-5.03929	7.16243e-06	1.61436e-05	2.76038
ACADM	-1.47777	10.9099	-10.6817	3.08092e-14	2.82397e-13	21.984
C1orf116	-1.47836	5.26101	-7.85165	3.88301e-10	1.62375e-09	12.5169
GALNT3	-1.47872	5.78251	-12.324	2.00169e-16	3.13957e-15	27.0422
KCNJ13	-1.48679	3.81499	-13.4769	7.17174e-18	1.64338e-16	30.3847
CYP2B6	-1.48784	4.3078	-11.4803	2.5479e-15	2.99978e-14	24.4873
C2orf15	-1.48792	4.11683	-15.622	2.2567e-20	1.07016e-18	36.1629
GK	-1.49173	7.42856	-7.51709	1.24607e-09	4.79831e-09	11.3515
IP6K3	-1.4958	5.63956	-5.39238	2.13383e-06	5.14459e-06	3.9523
UGT2B28	-1.49996	10.5346	-6.58248	3.32028e-08	1.02795e-07	8.07808
SERPINA3	-1.50172	5.92403	-3.592	0.000774635	0.00133064	-1.78594
TFAP2A	-1.50573	4.44481	-12.3989	1.6042e-16	2.57351e-15	27.2645
RNF150	-1.50698	5.83314	-10.3987	7.59926e-14	6.39599e-13	21.0775
SPTSSB	-1.51107	3.52563	-26.6841	2.68134e-30	3.66199e-27	58.8667
COL4A6	-1.51223	4.00915	-19.3109	3.60369e-24	6.36425e-22	44.901
PTGDS	-1.51579	8.47546	-5.67426	8.02773e-07	2.04014e-06	4.91769
DHRS11	-1.51694	6.51046	-11.5642	1.97052e-15	2.3802e-14	24.7454
MRGPRF	-1.51704	6.03593	-5.80483	5.09169e-07	1.32822e-06	5.36812
DACH2	-1.51755	3.56183	-16.1999	5.23225e-21	2.93483e-19	37.6269
GSTO2	-1.51833	6.38079	-8.2003	1.16161e-10	5.32722e-10	13.7244
PHYH	-1.52283	10.8618	-9.1628	4.3916e-12	2.57931e-11	17.0063
ECHS1	-1.52339	11.4358	-11.649	1.52091e-15	1.89176e-14	25.0055
AKR7A3	-1.52345	8.97542	-8.52756	3.77643e-11	1.87914e-10	14.8496
C9orf66	-1.52358	7.39931	-5.19866	4.15561e-06	9.6609e-06	3.29564
ANK2	-1.52511	6.30943	-9.8583	4.37938e-13	3.13583e-12	19.3193
SERPINC1	-1.52512	4.06651	-10.9645	1.2627e-14	1.25693e-13	22.8798
NELL1	-1.52548	4.50742	-13.9157	2.11045e-18	5.71132e-17	31.6124
UCHL1	-1.52645	5.79005	-10.7187	2.74011e-14	2.54691e-13	22.1017
HMX2	-1.52703	4.1809	-8.49292	4.25146e-11	2.09717e-10	14.7309
GMPR	-1.52953	6.03893	-7.50222	1.31256e-09	5.03071e-09	11.2995
PPP1R36	-1.5357	5.76936	-7.20573	3.70831e-09	1.3228e-08	10.2625
GABRP	-1.53637	4.5482	-5.21101	3.98329e-06	9.27925e-06	3.33732
GJB1	-1.54206	7.51145	-11.0932	8.44049e-15	8.74618e-14	23.2843
MFSD3	-1.54538	6.16544	-12.7125	6.39741e-17	1.13176e-15	28.1877
ASB9	-1.54875	7.1769	-9.46723	1.59006e-12	1.01985e-11	18.0253
RGN	-1.55244	8.17007	-9.73842	6.48997e-13	4.48712e-12	18.9245
CLIC5	-1.55306	6.13708	-9.35921	2.27745e-12	1.41725e-11	17.6649
LOC102725343	-1.55351	5.24397	-15.1796	7.0855e-20	2.86865e-18	35.0164
TST	-1.55461	9.87886	-9.24437	3.3416e-12	2.00892e-11	17.2804
FOLR1	-1.55464	9.99867	-8.42643	5.33871e-11	2.58677e-10	14.5029
SPOCK1	-1.55618	7.8403	-4.10768	0.000156109	0.000294371	-0.246079
RANBP3L	-1.55629	3.55247	-7.92976	2.96076e-10	1.26812e-09	12.7882
CLDN16	-1.55657	6.02878	-12.4077	1.56284e-16	2.51702e-15	27.2907
LAD1	-1.55676	6.59494	-12.6387	7.93331e-17	1.36861e-15	27.9716
SCIN	-1.55678	7.75441	-5.38904	2.15854e-06	5.19928e-06	3.94095
GPM6B	-1.55705	5.5325	-6.73224	1.95972e-08	6.2749e-08	8.6029
ANXA3	-1.55888	6.81496	-4.21582	0.000110365	0.000212593	0.0897435
NINL	-1.56317	8.23748	-16.0618	7.39566e-21	3.95939e-19	37.2804
GP2	-1.56484	5.27493	-13.6149	4.8693e-18	1.16806e-16	30.7733
LUM	-1.56491	7.28354	-4.22755	0.000106269	0.000205224	0.126413
GDA	-1.56729	7.56546	-6.77731	1.67222e-08	5.40514e-08	8.7609
SLC2A4	-1.56952	3.82548	-28.6166	1.1619e-31	2.97533e-28	61.9382
CNKSR1	-1.5706	5.61036	-13.4693	7.32591e-18	1.67125e-16	30.3634
ATP6V1B1	-1.57098	5.55463	-8.36406	6.61242e-11	3.15468e-10	14.2886
SMIM24	-1.57098	10.4452	-6.64597	2.65518e-08	8.33497e-08	8.30054
DACH1	-1.57602	6.24595	-7.12589	4.90812e-09	1.71789e-08	9.98284
SCNN1A	-1.57893	6.83137	-10.6021	3.96711e-14	3.54273e-13	21.7302
SLC22A13	-1.58072	6.0413	-9.83562	4.71709e-13	3.34259e-12	19.2447
SUGCT	-1.58126	8.12425	-7.95808	2.6838e-10	1.15675e-09	12.8864
TMEM252	-1.5823	6.62928	-5.60388	1.02545e-06	2.57191e-06	4.6757
LINGO2	-1.58525	4.38536	-18.7426	1.27119e-23	1.73712e-21	43.6441
APCDD1L	-1.58673	5.57435	-18.0368	6.34136e-23	7.02211e-21	42.0399
SLPI	-1.58783	7.20239	-3.41683	0.00130542	0.00217316	-2.28265
NAPSA	-1.58811	8.25857	-5.73196	6.56587e-07	1.68811e-06	5.1165
KCNE1	-1.59077	4.04024	-12.2382	2.58131e-16	3.94927e-15	26.7868
GK3P	-1.59344	6.3039	-8.68348	2.21861e-11	1.15239e-10	15.3825
LOC389332	-1.59459	7.22405	-7.90319	3.24671e-10	1.37906e-09	12.6959
DPT	-1.59742	4.87496	-10.6216	3.72848e-14	3.35448e-13	21.7924
PP7080	-1.59864	8.16335	-7.31905	2.49217e-09	9.14958e-09	10.6592
TDRD9	-1.60099	5.07668	-5.96768	2.88064e-07	7.78122e-07	5.93231
NR1I3	-1.601	4.19884	-19.048	6.4332e-24	1.00486e-21	44.3233
SLC16A7	-1.60287	5.92218	-6.48783	4.63319e-08	1.40387e-07	7.74663
WDR72	-1.60399	7.84874	-9.50056	1.42358e-12	9.22313e-12	18.1363
TMPRSS4	-1.60574	6.0356	-8.28304	8.73572e-11	4.07746e-10	14.0097
SLC12A6	-1.60597	6.88237	-10.874	1.67792e-14	1.62832e-13	22.5943
LOC101928820	-1.60642	4.67066	-5.95973	2.96205e-07	7.98849e-07	5.90469
RAB4B	-1.60744	6.55492	-18.6569	1.54153e-23	2.02434e-21	43.4517
ENTPD5	-1.60814	7.4486	-9.99733	2.78114e-13	2.0718e-12	19.775
LINC00113	-1.61375	4.2902	-8.99084	7.83074e-12	4.40232e-11	16.4264
MOGAT1	-1.61642	5.80204	-11.9096	6.90361e-16	9.4854e-15	25.7988
CLNK	-1.61648	4.66299	-7.55414	1.09476e-09	4.2597e-09	11.4808
C2orf40	-1.61777	8.35883	-5.07302	6.38509e-06	1.44824e-05	2.87325
SALL3	-1.61925	4.27575	-12.693	6.77199e-17	1.19082e-15	28.1306
AOC1	-1.61991	10.0233	-3.78856	0.000425246	0.000756674	-1.21187
OSBPL6	-1.62094	4.88504	-15.367	4.35248e-20	1.8852e-18	35.5048
GRB14	-1.62114	8.15843	-6.8333	1.37312e-08	4.48854e-08	8.95721
KLK6	-1.62118	5.53008	-8.72132	1.95063e-11	1.0207e-10	15.5115
ATP1A1	-1.62154	10.892	-13.1746	1.68898e-17	3.49853e-16	29.5249
EPCAM	-1.62221	10.6786	-7.62016	8.69389e-10	3.43762e-09	11.7111
GSTA3	-1.62296	7.92995	-7.15694	4.40114e-09	1.55237e-08	10.0916
PTPRD	-1.62333	5.95917	-8.27402	9.01113e-11	4.19932e-10	13.9787
KLHL13	-1.62346	7.68231	-7.11194	5.15457e-09	1.79861e-08	9.93397
PTPRO	-1.62509	8.29098	-10.2774	1.12238e-13	9.0631e-13	20.6859
PSG11	-1.62546	4.50747	-30.0775	1.22476e-32	4.18173e-29	64.1296
GPT2	-1.62666	6.39529	-8.67242	2.30377e-11	1.1936e-10	15.3448
PRKAR2B	-1.6273	6.91434	-7.99037	2.39971e-10	1.04375e-09	12.9984
ZGPAT	-1.62811	7.9398	-10.4057	7.42901e-14	6.27849e-13	21.1002
PRRG2	-1.62858	5.54996	-18.9405	8.16848e-24	1.20388e-21	44.0852
CHN2	-1.63075	5.73866	-16.1808	5.48804e-21	3.04683e-19	37.5791
FMO4	-1.63361	7.98587	-8.56538	3.31865e-11	1.66612e-10	14.9791
ALDH4A1	-1.63366	7.89334	-8.02385	2.13698e-10	9.36032e-10	13.1144
DUSP26	-1.63454	6.0079	-23.8446	3.95261e-28	2.79218e-25	53.9509
C1orf168	-1.63522	5.53029	-7.77479	5.07243e-10	2.08005e-09	12.2497
LOC441179	-1.63736	4.31347	-10.0446	2.38464e-13	1.79999e-12	19.9294
SUSD2	-1.6383	7.19119	-8.94525	9.13301e-12	5.08406e-11	16.2722
COCH	-1.64055	6.24465	-10.3164	9.89877e-14	8.08235e-13	20.812
SLC2A12	-1.64094	4.66259	-14.7673	2.10025e-19	7.44391e-18	33.927
AMPH	-1.64556	4.55724	-14.4015	5.59864e-19	1.76724e-17	32.9437
COLEC11	-1.64846	8.08636	-7.32273	2.46025e-09	9.04374e-09	10.6721
MT1M	-1.64956	6.44772	-3.98204	0.000232533	0.000428003	-0.631003
SLC27A2	-1.65176	9.93374	-5.90203	3.62492e-07	9.66174e-07	5.70459
PLCL1	-1.65321	6.62027	-8.46669	4.65071e-11	2.27766e-10	14.641
L1CAM	-1.65475	5.69838	-11.8001	9.61029e-16	1.27099e-14	25.4666
MEST	-1.65513	7.92053	-5.98845	2.67848e-07	7.27158e-07	6.00443
ATP6V0E2	-1.65925	7.92913	-9.93383	3.42105e-13	2.49674e-12	19.5671
BPHL	-1.65981	8.98826	-9.99354	2.81568e-13	2.09448e-12	19.7626
TOX3	-1.66267	6.94502	-5.37508	2.26513e-06	5.43938e-06	3.89342
IGFBP2	-1.66708	7.65512	-6.69225	2.25597e-08	7.16079e-08	8.46273
ANKRD2	-1.67042	5.42788	-6.67176	2.4247e-08	7.65486e-08	8.39092
WIF1	-1.67669	3.89281	-9.46474	1.60326e-12	1.028e-11	18.0171
LCN12	-1.68233	5.93774	-13.1898	1.61752e-17	3.36071e-16	29.5683
IL17RB	-1.68366	8.96264	-5.61381	9.90682e-07	2.48989e-06	4.70979
SAT2	-1.68438	10.1983	-13.3549	1.01192e-17	2.22427e-16	30.0391
SLC39A4	-1.68516	7.42377	-7.87475	3.5836e-10	1.50809e-09	12.5972
DANCR	-1.68694	8.79962	-11.6842	1.36608e-15	1.72113e-14	25.1133
TMEM174	-1.69012	6.96385	-8.29838	8.28677e-11	3.88326e-10	14.0626
LOC101929480	-1.69306	5.34593	-12.6714	7.21217e-17	1.25958e-15	28.0673
CLUL1	-1.69986	4.15423	-20.3376	3.96851e-25	9.67844e-23	47.0979
PCDH9	-1.70154	5.22648	-11.7525	1.11019e-15	1.43311e-14	25.3217
ABCB1	-1.70261	7.66364	-7.30094	2.65551e-09	9.7023e-09	10.5958
ABCC6P1	-1.70795	5.94196	-7.26256	3.03805e-09	1.09863e-08	10.4615
LINC00955	-1.71088	3.86851	-11.5224	2.23929e-15	2.67488e-14	24.617
IL13RA2	-1.7135	5.41408	-7.17889	4.07472e-09	1.4432e-08	10.1685
DTX1	-1.72177	5.8477	-19.9102	9.83428e-25	2.01465e-22	46.1947
GATA3-AS1	-1.72631	4.46637	-20.052	7.26522e-25	1.55037e-22	46.4961
CLDN19	-1.72689	6.03245	-15.3485	4.56625e-20	1.94478e-18	35.4567
MT1E	-1.72798	10.4688	-7.68069	7.03943e-10	2.82598e-09	11.9221
SLC15A2	-1.73465	5.39871	-14.2962	7.44659e-19	2.25001e-17	32.6576
ERBB4	-1.73587	4.6215	-12.4956	1.20661e-16	1.99989e-15	27.5505
CCDC181	-1.73621	4.14611	-13.2177	1.49369e-17	3.12562e-16	29.6482
FBLN5	-1.7374	8.84116	-7.40613	1.83699e-09	6.87979e-09	10.9638
PDE1A	-1.74173	5.98644	-7.62189	8.64159e-10	3.4176e-09	11.7172
HAO1	-1.742	3.7541	-13.0871	2.16917e-17	4.34385e-16	29.2736
HADH	-1.74354	9.12147	-12.8367	4.46116e-17	8.21125e-16	28.5497
DAK	-1.74572	6.34278	-14.3368	6.66978e-19	2.04547e-17	32.7681
BIK	-1.74947	5.21506	-10.2433	1.25278e-13	1.00018e-12	20.5756
PFKFB2	-1.75051	5.76845	-15.6791	1.95036e-20	9.37912e-19	36.3091
KL	-1.75196	10.0412	-7.29668	2.69542e-09	9.83408e-09	10.5809
LGSN	-1.76046	4.06918	-9.10284	5.37084e-12	3.09848e-11	16.8045
PRR15L	-1.7635	6.72986	-7.17967	4.06354e-09	1.43949e-08	10.1712
CHL1	-1.76352	4.50283	-11.0086	1.09962e-14	1.10969e-13	23.0187
EHF	-1.76408	4.38722	-8.94658	9.09226e-12	5.0629e-11	16.2766
PHYHD1	-1.76416	6.94807	-8.64634	2.51777e-11	1.29368e-10	15.2558
CRYM	-1.76553	8.99987	-8.02498	2.12866e-10	9.32788e-10	13.1183
ACSBG2	-1.7755	4.74873	-19.0406	6.54014e-24	1.00738e-21	44.3069
ANGPTL1	-1.7808	4.8064	-10.7923	2.17057e-14	2.05729e-13	22.3357
TMEM72	-1.78331	8.08698	-9.84406	4.58833e-13	3.26037e-12	19.2725
LOC101927244	-1.78511	5.40987	-6.38476	6.65889e-08	1.96619e-07	7.38604
TMEM30B	-1.78897	5.23578	-10.1243	1.84086e-13	1.42524e-12	20.1892
LZTS3	-1.78996	8.13882	-14.6442	2.9159e-19	9.98009e-18	33.598
PAPPA	-1.79199	5.04274	-13.3947	9.04213e-18	2.01345e-16	30.1521
LYPD6B	-1.79324	5.04197	-9.89433	3.89237e-13	2.80475e-12	19.4376
MAL2	-1.79747	8.92739	-5.5993	1.0419e-06	2.61158e-06	4.65997
C12orf56	-1.80003	4.72986	-7.23583	3.33662e-09	1.19877e-08	10.3679
TMC4	-1.80078	7.7502	-7.65181	7.78512e-10	3.10103e-09	11.8215
MARVELD2	-1.80469	6.339	-8.83972	1.30514e-11	7.04347e-11	15.9143
AZGP1P1	-1.80884	4.45594	-23.5107	7.34917e-28	4.67389e-25	53.3381
TMEM95	-1.81057	5.25803	-32.9317	1.98117e-34	1.35288e-30	68.1214
GABRA2	-1.81404	3.81718	-12.5094	1.15849e-16	1.92636e-15	27.5914
SIM1	-1.81454	6.07076	-8.38391	6.17678e-11	2.95925e-10	14.3568
ADAMTS16	-1.81909	5.17155	-20.6223	2.18664e-25	5.67032e-23	47.6907
ACADSB	-1.81964	8.09776	-11.1216	7.72625e-15	8.05906e-14	23.3731
LOC285556	-1.82164	3.64439	-10.0061	2.70269e-13	2.0185e-12	19.8037
SELENBP1	-1.82198	8.56115	-13.3082	1.15503e-17	2.50126e-16	29.9063
FMO1	-1.82442	10.207	-5.2024	4.10266e-06	9.54213e-06	3.30826
PACRG	-1.82931	5.49816	-15.8504	1.26104e-20	6.37868e-19	36.7459
PIGR	-1.82976	7.8861	-6.55468	3.66167e-08	1.12598e-07	7.9807
EMX1	-1.83911	6.01702	-13.7047	3.7887e-18	9.47685e-17	31.0252
CLMP	-1.84136	4.51373	-11.3631	3.65433e-15	4.13149e-14	24.1251
RASSF10	-1.85267	5.25028	-9.81956	4.97201e-13	3.50988e-12	19.1919
CR2	-1.85533	3.76772	-10.8038	2.09317e-14	1.99249e-13	22.3722
TMPRSS2	-1.85565	5.74876	-12.4946	1.21006e-16	2.00237e-15	27.5477
LINC00473	-1.85635	4.7783	-8.53925	3.62852e-11	1.80949e-10	14.8897
C14orf37	-1.8586	5.22196	-9.149	4.59971e-12	2.6892e-11	16.9599
BHMT	-1.86464	11.6168	-5.64593	8.85957e-07	2.2396e-06	4.82021
SLC16A9	-1.87152	10.7011	-5.19898	4.15103e-06	9.65135e-06	3.29673
CORO2B	-1.88001	4.97732	-13.1125	2.01687e-17	4.08681e-16	29.3467
ARG2	-1.88227	8.28406	-7.5957	9.46892e-10	3.72609e-09	11.6258
AQP11	-1.88434	6.32065	-10.1766	1.55395e-13	1.21924e-12	20.3593
MPPED2	-1.89719	5.6634	-8.29613	8.35103e-11	3.9086e-10	14.0548
APELA	-1.90517	3.66848	-9.72228	6.84393e-13	4.7096e-12	18.8712
PM20D1	-1.9055	4.73324	-8.21916	1.08851e-10	5.02122e-10	13.7895
MCOLN3	-1.90812	5.01927	-12.2225	2.70489e-16	4.1107e-15	26.7399
EYA2	-1.91042	5.37026	-16.3989	3.19004e-21	1.94498e-19	38.1222
SLC4A11	-1.91148	6.38907	-9.34293	2.40447e-12	1.48861e-11	17.6105
ETNK2	-1.9119	6.53548	-8.9024	1.05561e-11	5.79767e-11	16.127
CKMT2	-1.91302	6.46227	-5.70244	7.2773e-07	1.85982e-06	5.01474
OLFM4	-1.91505	4.06028	-6.29097	9.26113e-08	2.67706e-07	7.05828
HMGCS2	-1.91679	6.40462	-8.76057	1.70707e-11	9.04111e-11	15.6452
MUC13	-1.91838	5.32569	-8.66919	2.32924e-11	1.20497e-10	15.3338
GCM1	-1.91924	4.23358	-11.4199	3.06786e-15	3.54474e-14	24.3008
TCF21	-1.92111	6.67766	-8.48271	4.40251e-11	2.16907e-10	14.696
STRIP2	-1.9276	4.29064	-10.2697	1.15065e-13	9.25486e-13	20.661
SLC7A9	-1.93519	9.42098	-6.08241	1.92674e-07	5.33323e-07	6.33108
NDNF	-1.93584	6.92874	-4.642	2.72999e-05	5.7033e-05	1.44949
CCBE1	-1.93599	4.59771	-12.9237	3.46896e-17	6.56795e-16	28.8022
SCN2A	-1.93806	4.51966	-12.057	4.43306e-16	6.44998e-15	26.2437
LRRC19	-1.94944	7.86509	-6.82817	1.39815e-08	4.56599e-08	8.93921
PNPLA3	-1.95025	6.18893	-9.04833	6.45173e-12	3.67718e-11	16.6206
FMO5	-1.95086	5.19683	-14.9783	1.20139e-19	4.55773e-18	34.4871
NAT2	-1.957	4.93631	-14.5327	3.93171e-19	1.28872e-17	33.2982
TAGLN3	-1.95705	5.73362	-16.6184	1.85681e-21	1.23502e-19	38.6638
FUT3	-1.96354	6.17581	-12.2708	2.34364e-16	3.61831e-15	26.8838
CTSV	-1.96699	6.88604	-8.03023	2.09033e-10	9.17167e-10	13.1365
RBP2	-1.96944	4.98486	-18.7424	1.27193e-23	1.73712e-21	43.6435
AP1M2	-1.97163	7.39235	-12.1775	3.09276e-16	4.65528e-15	26.6053
FLJ35700	-1.97381	4.84758	-4.62819	2.85836e-05	5.95448e-05	1.40461
CTH	-1.97756	6.13263	-12.417	1.52062e-16	2.45674e-15	27.3183
ANXA9	-1.98352	6.15047	-13.3341	1.07346e-17	2.34944e-16	29.9799
MME	-1.99021	9.46153	-8.31678	7.7788e-11	3.66337e-10	14.1259
ALDH8A1	-1.99204	10.3056	-5.41534	1.97113e-06	4.77876e-06	4.03053
SMCO3	-1.99204	4.79107	-10.3557	8.7225e-14	7.22532e-13	20.9391
KLK1	-1.99434	6.53414	-9.7678	5.89265e-13	4.10183e-12	19.0214
PLCD4	-1.99758	5.30507	-13.9529	1.90443e-18	5.20188e-17	31.7154
NTNG1	-2.01383	4.58324	-14.1994	9.68967e-19	2.81564e-17	32.3934
LOC100506459	-2.01552	5.12732	-18.3835	2.86301e-23	3.47051e-21	42.8339
PLA2R1	-2.01929	4.76411	-12.3328	1.95026e-16	3.0686e-15	27.0683
LOC102723864	-2.02505	6.59821	-11.1064	8.1024e-15	8.42877e-14	23.3254
QPRT	-2.02933	8.30385	-8.73543	1.85931e-11	9.77163e-11	15.5596
SPINK1	-2.03038	6.68378	-3.84899	0.000352655	0.000633505	-1.03206
CLSTN2	-2.03055	5.38885	-10.735	2.60186e-14	2.428e-13	22.1537
DDX25	-2.03098	4.75863	-14.3998	5.62399e-19	1.76979e-17	32.9391
BCHE	-2.03725	4.88943	-7.34121	2.30595e-09	8.50706e-09	10.7367
SLC5A11	-2.03809	6.17303	-11.174	6.56383e-15	6.98891e-14	23.5369
DIRAS3	-2.03966	5.71707	-11.9549	6.02207e-16	8.43254e-15	25.936
ERVMER34-1	-2.04424	4.50161	-13.7877	3.00764e-18	7.77961e-17	31.2569
ACOX2	-2.04753	8.1654	-10.4684	6.07823e-14	5.23188e-13	21.3017
HOGA1	-2.05812	9.19693	-9.40275	1.9701e-12	1.2403e-11	17.8104
CHRDL1	-2.05875	6.57506	-6.85719	1.2624e-08	4.15779e-08	9.04097
SLIT2	-2.06115	7.361	-6.79566	1.56761e-08	5.0886e-08	8.82524
LOC344887	-2.06562	4.41473	-11.4172	3.09312e-15	3.56588e-14	24.2925
MAN1C1	-2.06707	7.18167	-10.3743	8.21616e-14	6.86779e-13	20.9991
NOX4	-2.08323	7.69337	-7.22008	3.52618e-09	1.26289e-08	10.3128
CYP17A1	-2.08707	4.42061	-12.3329	1.94929e-16	3.0686e-15	27.0689
AOX1	-2.09201	8.72587	-6.48329	4.70776e-08	1.42394e-07	7.73076
CLDN10	-2.09492	9.5627	-11.853	8.18899e-16	1.10006e-14	25.6273
GSTM3	-2.09594	8.10556	-9.6232	9.48704e-13	6.3472e-12	18.5435
CDH9	-2.10991	4.78201	-12.5655	9.82732e-17	1.65425e-15	27.7566
BMPR1B	-2.11205	4.97892	-9.26248	3.14526e-12	1.90407e-11	17.3411
MT1X	-2.1172	10.7946	-8.18515	1.22389e-10	5.58907e-10	13.6722
LOC100505985	-2.11784	7.74308	-4.35604	7.00515e-05	0.000138789	0.531062
RBP4	-2.1208	7.06513	-7.26521	3.00989e-09	1.08961e-08	10.4708
UPK1B	-2.12194	5.69974	-7.91304	3.13759e-10	1.33548e-09	12.7301
ACOT12	-2.12523	3.75174	-14.2317	8.873e-19	2.60046e-17	32.4817
PROZ	-2.13283	6.25918	-12.2975	2.16467e-16	3.36972e-15	26.9636
SUSD4	-2.14088	5.1031	-13.3114	1.14471e-17	2.48416e-16	29.9153
CAPN3	-2.14161	8.00763	-10.0564	2.29463e-13	1.73781e-12	19.968
AKR1B10	-2.14813	4.76942	-5.37749	2.24635e-06	5.39809e-06	3.90163
HPGD	-2.15126	7.38163	-7.8078	4.52228e-10	1.86932e-09	12.3645
AGXT2	-2.15275	9.93815	-6.67361	2.40899e-08	7.61229e-08	8.3974
SLC13A1	-2.15542	8.67875	-6.25675	1.04451e-07	2.99604e-07	6.93879
SORD	-2.16281	7.45916	-11.2801	4.7222e-15	5.16768e-14	23.8676
APOM	-2.16332	9.31923	-7.01057	7.36045e-09	2.51101e-08	9.57869
HYKK	-2.16392	6.09657	-20.36	3.78591e-25	9.34435e-23	47.1448
APOH	-2.17433	5.65816	-11.7122	1.25461e-15	1.59442e-14	25.1988
LPA	-2.17463	3.93599	-31.1445	2.51792e-33	1.03164e-29	65.6648
CHP2	-2.17469	4.93305	-17.457	2.46103e-22	2.10948e-20	40.685
SLC4A1	-2.17641	5.7089	-14.0971	1.2814e-18	3.64088e-17	32.113
EPN3	-2.17964	4.83642	-15.5808	2.50845e-20	1.17276e-18	36.057
LDHD	-2.18654	6.03963	-11.9546	6.02707e-16	8.43377e-15	25.9352
DHDH	-2.18808	7.22483	-9.1908	3.99815e-12	2.36654e-11	17.1005
TMEM45B	-2.18999	6.2067	-9.16863	4.30655e-12	2.5359e-11	17.0259
DDC	-2.20293	9.24259	-6.79993	1.54426e-08	5.01835e-08	8.84019
FREM1	-2.21309	5.15977	-14.8237	1.80807e-19	6.52116e-18	34.0772
SLC6A19	-2.21393	7.73337	-7.9606	2.66044e-10	1.14765e-09	12.8952
FOXI1	-2.21732	5.47221	-7.0444	6.53528e-09	2.24445e-08	9.69726
CWH43	-2.22905	5.17702	-10.6076	3.89808e-14	3.48852e-13	21.7478
PRLR	-2.22943	4.8256	-15.2309	6.19856e-20	2.54729e-18	35.1504
GGH	-2.23839	9.04275	-8.94422	9.16483e-12	5.095e-11	16.2687
EFHD1	-2.24303	9.92715	-11.5023	2.38147e-15	2.82168e-14	24.5551
FBP1	-2.24337	9.63547	-10.3706	8.3146e-14	6.9382e-13	20.9871
[truncated: 217 more rows]

## Sheet: stage two
genesymbol	logFC	AveExpr	t	P.Value	adj.P.Val	B
KISS1R	6.69783	6.73366	19.1967	2.41e-21	1.62e-19	38.5178
TNFAIP6	6.34152	6.06439	24.1833	6.34e-25	1.33e-22	46.7893
NPTX2	6.33761	6.64473	15.3608	4.94e-18	1.32e-16	30.8206
CTHRC1	5.51987	6.98024	14.4345	3.85e-17	8.16e-16	28.7445
ANGPTL4	5.39998	8.18106	29.7303	3.27e-28	1.86e-25	54.3202
CP	5.37129	6.63874	13.6975	2.11e-16	3.79e-15	27.0243
NDUFA4L2	5.15061	8.32843	23.2134	2.79e-24	5.01e-22	45.3078
HILPDA	5.01364	9.15924	18.2736	1.34e-20	7.5e-19	36.7866
TMEM45A	4.85465	6.47757	13.3352	4.97e-16	8.19e-15	26.1556
LINC00887	4.63075	5.23236	32.344	1.43e-29	1.13e-26	57.4059
C3	4.57305	10.0931	17.0112	1.58e-19	6.41e-18	34.2997
NETO2	4.51263	6.57657	30.2504	1.72e-28	1.07e-25	54.9552
CA9	4.47279	7.51078	29.2926	5.65e-28	3.03e-25	53.7774
LOX	4.26253	6.38989	17.9868	2.32e-20	1.21e-18	36.2339
MAP3K7CL	4.14205	5.91315	18.8356	4.67e-21	2.96e-19	37.8489
ENO2	4.03078	7.23807	21.2385	6.76e-23	7.34e-21	42.1102
EGLN3	4.0255	7.851	24.8268	2.44e-25	5.62e-23	47.7423
TGFBI	3.98795	10.0169	12.3831	5.11e-15	6.62e-14	23.7974
COL23A1	3.96677	7.23478	25.734	6.61e-26	1.76e-23	49.0474
CDCA2	3.9311	5.64416	16.1824	8.61e-19	2.82e-17	32.5863
VCAN	3.92245	7.61579	11.1235	1.33e-13	1.27e-12	20.5034
IGFBP3	3.9107	10.6159	29.4472	4.65e-28	2.58e-25	53.9701
ANGPT2	3.82937	6.34062	16.1175	9.86e-19	3.18e-17	32.4493
C5orf46	3.81277	5.79916	9.90806	3.72e-12	2.66e-11	17.1308
INHBB	3.7636	7.29253	14.8303	1.58e-17	3.69e-16	29.643
LOC100132891	3.74069	5.677	25.111	1.61e-25	3.89e-23	48.1559
PLA2G7	3.72855	4.52643	14.2533	5.81e-17	1.18e-15	28.3274
LPCAT1	3.63532	8.476	23.3363	2.3e-24	4.21e-22	45.4986
APOLD1	3.5042	8.81563	10.2116	1.59e-12	1.22e-11	17.991
ADM	3.49554	10.6298	19.9666	6.04e-22	4.98e-20	39.9092
ENPP3	3.492	8.25749	15.8291	1.81e-18	5.43e-17	31.8356
SEMA5B	3.48078	8.24878	33.7109	3.05e-30	2.97e-27	58.9214
C1QB	3.44266	8.28141	14.5653	2.86e-17	6.23e-16	29.0433
CCL20	3.43059	6.26238	9.59996	8.94e-12	5.91e-11	16.2457
SPINK13	3.37735	5.08992	7.16895	1.33e-08	5.08e-08	8.88027
CAV1	3.35735	8.82283	14.5431	3.01e-17	6.5e-16	28.9926
ADAMDEC1	3.34212	4.34367	8.25099	4.75e-10	2.3e-09	12.2347
GPR65	3.33903	5.60005	16.9992	1.62e-19	6.52e-18	34.2752
FCGR1B	3.33213	6.13892	12.8559	1.59e-15	2.29e-14	24.9823
RASSF2	3.32706	6.78977	17.4847	6.16e-20	2.85e-18	35.2493
GPR183	3.32662	5.93832	14.7279	1.99e-17	4.54e-16	29.4122
PRIMA1	3.29523	6.38348	7.35001	7.57e-09	3.01e-08	9.44826
BIRC3	3.23629	6.98344	15.3313	5.26e-18	1.4e-16	30.7559
BCL2A1	3.13937	4.99668	10.8118	3.06e-13	2.72e-12	19.6567
IDO1	3.13836	6.95123	13.6283	2.48e-16	4.39e-15	26.8595
C1QC	3.10105	8.47799	13.5694	2.85e-16	4.97e-15	26.719
PPFIA4	3.08538	5.71538	18.7081	5.92e-21	3.59e-19	37.6103
CXCR4	3.0658	8.49616	16.7844	2.49e-19	9.56e-18	33.8375
LINC01094	3.05772	4.21707	14.6031	2.63e-17	5.76e-16	29.1292
CYP2J2	3.05228	7.33442	7.85844	1.57e-09	6.99e-09	11.0297
ST8SIA4	3.03259	4.43287	20.963	1.08e-22	1.06e-20	41.6434
FABP5	3.02417	7.65844	9.97174	3.11e-12	2.26e-11	17.3122
C10orf10	2.97831	8.22458	16.6609	3.21e-19	1.19e-17	33.5836
COL21A1	2.95651	6.06979	8.70205	1.23e-10	6.61e-10	13.5994
TIMP1	2.95542	10.3861	14.9168	1.31e-17	3.1e-16	29.837
PLOD2	2.95181	9.04777	16.4295	5.15e-19	1.8e-17	33.1041
CSTA	2.94721	6.34178	14.7171	2.04e-17	4.62e-16	29.3876
PLK2	2.94005	7.78455	14.9624	1.18e-17	2.86e-16	29.9389
DIRAS2	2.9391	4.48118	16.306	6.65e-19	2.24e-17	32.8461
CXCL9	2.90718	6.92616	7.80493	1.85e-09	8.15e-09	10.8643
SPAG4	2.90035	7.14954	20.3915	2.87e-22	2.58e-20	40.6576
NOL3	2.89671	7.5789	24.0174	8.14e-25	1.62e-22	46.5398
KCNJ2	2.89327	6.47211	10.6638	4.58e-13	3.93e-12	19.2502
CTSS	2.88817	7.4255	17.1898	1.1e-19	4.74e-18	34.6603
IL10RA	2.8744	7.21331	16.1986	8.32e-19	2.74e-17	32.6204
LINC00462	2.86769	5.29195	10.3441	1.1e-12	8.73e-12	18.3626
RGS1	2.86507	6.37423	15.3155	5.45e-18	1.44e-16	30.7212
CSPG4	2.86029	5.20754	14.1637	7.14e-17	1.44e-15	28.1197
GJA1	2.8474	9.72018	14.0064	1.03e-16	2.01e-15	27.7529
APOC1	2.83295	7.62629	11.503	4.87e-14	5.07e-13	21.5171
RRM2	2.82821	5.37239	14.1735	6.98e-17	1.41e-15	28.1424
ITK	2.82369	5.02277	12.9462	1.27e-15	1.88e-14	25.2054
GAS6-AS1	2.79075	4.58358	27.9337	3.26e-27	1.31e-24	52.04
FPR3	2.79004	5.61262	17.8495	3.02e-20	1.52e-18	35.9669
TM6SF1	2.78218	5.69319	15.4635	3.96e-18	1.08e-16	31.045
NKG7	2.78066	5.62899	12.4129	4.75e-15	6.18e-14	23.8729
CCND1	2.77548	8.66005	13.2415	6.22e-16	9.93e-15	25.9284
CCL18	2.77102	5.33092	8.48642	2.34e-10	1.2e-09	12.9498
VIM	2.76982	8.91896	19.1274	2.73e-21	1.8e-19	38.3903
ZNF395	2.76101	7.52798	15.5697	3.15e-18	8.82e-17	31.2762
VEGFA	2.76096	9.80173	16.8189	2.33e-19	9.04e-18	33.9079
LYZ	2.75748	8.1298	7.67058	2.8e-09	1.19e-08	10.4479
CCL5	2.75066	6.97867	10.6351	4.95e-13	4.22e-12	19.1712
PPP1R3C	2.73994	6.49252	13.9616	1.14e-16	2.19e-15	27.6478
CD2	2.73828	6.13561	10.951	2.1e-13	1.94e-12	20.0365
MS4A7	2.7377	7.55744	12.1007	1.04e-14	1.26e-13	23.0764
PRKCDBP	2.72572	7.0466	19.5438	1.28e-21	9.42e-20	39.1508
IFI16	2.7185	8.08918	21.9204	2.19e-23	2.7e-21	43.2431
APBB1IP	2.71568	6.21334	27.2291	8.35e-27	2.71e-24	51.1067
CD1D	2.70819	4.80115	16.944	1.81e-19	7.21e-18	34.1632
C16orf54	2.70703	4.84244	11.0819	1.48e-13	1.4e-12	20.3911
DDIT4	2.70687	10.3278	15.0677	9.37e-18	2.32e-16	30.1736
TMEM91	2.69654	7.31424	19.965	6.06e-22	4.98e-20	39.9063
CASP1	2.69631	7.16735	19.3539	1.81e-21	1.26e-19	38.8057
FABP7	2.6897	4.48526	4.99228	1.31e-05	3.16e-05	2.00404
ESM1	2.68512	6.97431	10.993	1.88e-13	1.74e-12	20.1504
IKBIP	2.68364	6.02446	23.172	2.97e-24	5.3e-22	45.2434
TYROBP	2.64023	8.67245	15.5945	2.98e-18	8.44e-17	31.33
PDK1	2.635	6.29492	23.6063	1.52e-24	2.91e-22	45.9146
SLFN13	2.62458	4.56071	14.9504	1.21e-17	2.92e-16	29.9122
SLC2A3	2.62382	7.07501	14.7364	1.95e-17	4.47e-16	29.4314
P2RX7	2.6238	5.47773	20.8006	1.42e-22	1.36e-20	41.3657
EOMES	2.62359	5.55123	9.71305	6.47e-12	4.4e-11	16.572
TNFSF13B	2.62196	7.06422	12.1172	1e-14	1.21e-13	23.1189
CD36	2.61625	5.54058	11.144	1.26e-13	1.21e-12	20.5586
C8orf22	2.61447	4.11207	5.26315	5.59e-06	1.42e-05	2.84931
MMP1	2.61294	4.68188	5.58209	2.03e-06	5.51e-06	3.85352
LGALS1	2.60492	10.566	17.0206	1.55e-19	6.3e-18	34.3187
SCN4B	2.60206	5.29651	7.70563	2.52e-09	1.08e-08	10.5567
CD86	2.59948	5.18561	17.595	4.96e-20	2.35e-18	35.4674
OLFML2B	2.59867	6.63793	13.1399	7.95e-16	1.23e-14	25.681
GZMA	2.59007	5.94662	10.1121	2.1e-12	1.58e-11	17.7103
FCER1G	2.58904	7.42911	13.4562	3.73e-16	6.34e-15	26.4476
LAPTM5	2.58659	8.97004	13.8069	1.63e-16	3.01e-15	27.2836
IL7R	2.58192	6.56634	9.30855	2.07e-11	1.29e-10	15.3976
MCAM	2.57588	8.20983	9.38236	1.67e-11	1.05e-10	15.6134
TYMP	2.56291	5.93338	15.7997	1.93e-18	5.73e-17	31.7725
CXCL10	2.55732	6.71776	7.08675	1.72e-08	6.48e-08	8.62166
CLEC5A	2.55683	4.23855	9.55123	1.03e-11	6.73e-11	16.1046
DDB2	2.55633	7.32454	26.3233	2.89e-26	8.21e-24	49.8724
FGG	2.55188	4.83313	3.04032	0.00423083	0.00689332	-3.59617
LOC102659288	2.54293	4.13909	4.3969	8.35e-05	0.000177516	0.184521
MIR210HG	2.53982	6.08376	20.895	1.21e-22	1.18e-20	41.5273
PRELID2	2.5394	6.018	20.7684	1.5e-22	1.43e-20	41.3104
ITGA4	2.53602	4.95794	14.3326	4.85e-17	1.01e-15	28.5102
GBP5	2.52953	5.07349	10.4847	7.47e-13	6.12e-12	18.7547
VWF	2.52309	7.47854	12.1776	8.58e-15	1.05e-13	23.2738
CD52	2.51505	6.52534	12.2706	6.78e-15	8.51e-14	23.5114
CXCL11	2.51364	3.82281	6.37522	1.63e-07	5.23e-07	6.36988
CD69	2.50942	5.2819	10.6401	4.88e-13	4.17e-12	19.1849
PYGL	2.50597	7.43138	16.2462	7.53e-19	2.5e-17	32.7207
SLFN11	2.50577	6.24769	15.9624	1.36e-18	4.24e-17	32.1202
LY96	2.50468	6.74005	10.52	6.78e-13	5.62e-12	18.8526
PCDHB14	2.50404	5.07786	9.61679	8.52e-12	5.66e-11	16.2944
HAVCR1	2.48772	5.52417	6.60059	7.98e-08	2.68e-07	7.08508
ENTPD1	2.46755	6.02501	19.2792	2.07e-21	1.42e-19	38.6691
SACS	2.46179	5.93428	17.1365	1.23e-19	5.19e-18	34.5529
AHNAK2	2.45697	5.4109	9.98667	2.98e-12	2.18e-11	17.3547
C1S	2.45256	7.95323	6.78834	4.41e-08	1.55e-07	7.67976
MYC	2.45234	8.81954	12.0617	1.15e-14	1.37e-13	22.9763
PAG1	2.45184	6.37172	21.6047	3.67e-23	4.21e-21	42.7226
EDN1	2.45115	7.342	13.6558	2.32e-16	4.14e-15	26.9252
SLC6A3	2.44861	6.55526	6.7438	5.08e-08	1.76e-07	7.5388
TRIM59	2.44623	4.62206	16.0222	1.2e-18	3.78e-17	32.2476
PGF	2.44236	8.33183	12.8805	1.49e-15	2.17e-14	25.0433
GBP2	2.43996	7.15791	12.3421	5.67e-15	7.25e-14	23.6934
CCDC102B	2.43305	5.10021	10.1601	1.83e-12	1.39e-11	17.8459
RGS18	2.43102	5.25719	15.9691	1.35e-18	4.2e-17	32.1345
C1QA	2.42934	8.6501	11.5451	4.36e-14	4.59e-13	21.6284
GZMB	2.42579	5.38014	11.0096	1.8e-13	1.67e-12	20.1954
PYCARD	2.42292	6.91958	15.1501	7.82e-18	1.96e-16	30.3566
NFE2L3	2.41528	5.02604	13.3706	4.57e-16	7.6e-15	26.2412
MNDA	2.41182	7.1605	12.9313	1.32e-15	1.94e-14	25.1688
LINC01127	2.39688	5.3597	4.87485	1.9e-05	4.46e-05	1.64045
C1orf162	2.38979	7.44081	12.3923	5e-15	6.48e-14	23.8208
HCLS1	2.3897	7.92306	13.092	8.93e-16	1.36e-14	25.5638
CDH13	2.38721	6.18391	10.0167	2.74e-12	2.02e-11	17.4399
CD247	2.38691	5.55359	18.9794	3.58e-21	2.33e-19	38.1166
TLR7	2.37734	5.39951	14.5575	2.91e-17	6.32e-16	29.0255
UHRF1	2.37686	4.97556	17.8624	2.95e-20	1.49e-18	35.9921
CAV2	2.3744	7.46099	19.4858	1.42e-21	1.03e-19	39.0457
MTCP1	2.37378	4.57987	12.2009	8.09e-15	9.96e-14	23.3334
HAPLN1	2.37351	4.58851	11.5197	4.66e-14	4.87e-13	21.5613
EZH2	2.36254	4.66261	20.2187	3.88e-22	3.35e-20	40.3548
IL7	2.36224	5.97115	13.1341	8.06e-16	1.24e-14	25.6667
HIST1H2BK	2.35821	8.81235	11.3103	8.08e-14	8.08e-13	21.0048
IRX3	2.35814	10.0775	10.2528	1.42e-12	1.1e-11	18.1068
GZMK	2.35601	6.36506	6.76894	4.69e-08	1.64e-07	7.61837
LDLRAD3	2.34798	6.40608	15.5349	3.39e-18	9.41e-17	31.2006
IGSF6	2.34731	4.17315	17.3844	7.5e-20	3.38e-18	35.0498
CD163	2.34339	7.02713	9.11638	3.62e-11	2.14e-10	14.8326
TLR3	2.33943	6.87093	17.3124	8.65e-20	3.83e-18	34.9062
LILRB2	2.33544	5.32454	18.866	4.42e-21	2.82e-19	37.9058
SERPINE1	2.3328	7.09186	5.61472	1.83e-06	5.01e-06	3.95664
GLIPR1	2.33188	6.33455	15.905	1.54e-18	4.67e-17	31.998
RNF166	2.33115	5.61241	16.4809	4.64e-19	1.63e-17	33.2111
PCDH17	2.32638	6.90044	11.7249	2.73e-14	3e-13	22.1013
COL1A2	2.31992	8.4746	7.52679	4.37e-09	1.8e-08	10.0005
CXCL6	2.31936	4.2327	3.61579	0.00085486	0.00155141	-2.07423
KCNK3	2.31914	6.19328	12.9582	1.23e-15	1.83e-14	25.2352
SLC43A3	2.31594	6.39418	15.7273	2.25e-18	6.56e-17	31.6168
NLGN1	2.31384	6.16823	14.9116	1.32e-17	3.14e-16	29.8254
ALDOC	2.31189	7.7819	16.3775	5.74e-19	1.97e-17	32.9958
RNASET2	2.30789	6.8055	17.0384	1.49e-19	6.13e-18	34.3547
RAD51AP1	2.30579	4.51812	17.3873	7.46e-20	3.37e-18	35.0556
PLAC8	2.30547	5.29886	13.6635	2.28e-16	4.08e-15	26.9436
CORO1A	2.30293	6.63385	13.1856	7.12e-16	1.11e-14	25.7925
RCN1	2.29583	8.56869	13.1408	7.93e-16	1.23e-14	25.683
DPY19L2P2	2.29474	5.56375	8.62819	1.53e-10	8.07e-10	13.3775
CD300LF	2.2945	5.47727	18.738	5.6e-21	3.44e-19	37.6664
QRFPR	2.29317	3.89525	12.668	2.52e-15	3.48e-14	24.5149
TOX2	2.29111	4.64563	10.6019	5.42e-13	4.59e-12	19.0795
TLR2	2.29069	7.62187	12.2388	7.35e-15	9.14e-14	23.4304
RAB33A	2.28963	4.16755	13.9321	1.22e-16	2.33e-15	27.5786
SAMHD1	2.28603	6.69477	16.4836	4.61e-19	1.63e-17	33.2166
CCL28	2.28465	5.96584	10.0468	2.52e-12	1.87e-11	17.5253
IGJ	2.2786	6.74909	4.09022	0.000211655	0.000423518	-0.723591
HSPA6	2.27384	6.2688	14.553	2.94e-17	6.38e-16	29.0151
THEMIS2	2.27343	6.39754	13.7403	1.91e-16	3.47e-15	27.1258
P2RY8	2.27281	6.63595	15.7463	2.16e-18	6.34e-17	31.6576
EVI2A	2.27245	6.81069	11.0734	1.52e-13	1.43e-12	20.3682
TLR8	2.26405	4.80753	16.6394	3.35e-19	1.23e-17	33.5393
HLA-DPA1	2.26031	9.94184	14.1023	8.22e-17	1.63e-15	27.9768
GAS2L3	2.25382	7.36876	8.38448	3.18e-10	1.59e-09	12.6409
DGCR5	2.25206	6.23699	13.6295	2.47e-16	4.38e-15	26.8624
PROCR	2.24492	7.09825	19.4227	1.6e-21	1.15e-19	38.9311
FAM49A	2.24331	4.76038	24.0417	7.85e-25	1.6e-22	46.5764
TRBC1	2.23517	7.04334	8.78764	9.53e-11	5.24e-10	13.8558
PLVAP	2.2339	9.0988	7.38556	6.78e-09	2.72e-08	9.55953
FAM57A	2.22467	6.43886	12.1749	8.64e-15	1.06e-13	23.2668
ITGB2	2.21658	6.68683	16.1367	9.47e-19	3.07e-17	32.4901
RSPH9	2.2035	4.31558	17.9909	2.3e-20	1.2e-18	36.2419
RHBDF2	2.20227	6.35815	16.5239	4.24e-19	1.52e-17	33.3003
HLA-DRA	2.19979	11.4207	16.0124	1.23e-18	3.85e-17	32.2266
FUT11	2.19379	6.72183	21.8011	2.66e-23	3.19e-21	43.0472
CLEC4A	2.19029	5.23269	15.7186	2.29e-18	6.68e-17	31.5981
APOBEC3C	2.18629	6.32579	19.1449	2.64e-21	1.76e-19	38.4225
GPR34	2.18459	7.36912	9.63297	8.13e-12	5.42e-11	16.3411
CCR7	2.18374	4.63599	12.245	7.23e-15	9.01e-14	23.4462
HLA-DPB1	2.18133	8.00729	18.4276	1e-20	5.85e-19	37.0803
DCLK1	2.1809	4.59979	12.5262	3.58e-15	4.78e-14	24.1591
LOC101927972	2.18082	3.95577	10.6933	4.22e-13	3.66e-12	19.3314
AEBP1	2.17872	8.97769	7.82034	1.77e-09	7.8e-09	10.912
TFPI2	2.17673	6.72353	3.94473	0.000326763	0.000634444	-1.14549
HLA-DMA	2.1731	9.06208	14.666	2.28e-17	5.1e-16	29.2721
RAC2	2.16714	6.41108	14.1448	7.45e-17	1.5e-15	28.0757
LY86	2.16354	6.92033	13.4695	3.61e-16	6.17e-15	26.4795
MPEG1	2.15718	7.44907	11.655	3.27e-14	3.54e-13	21.9181
ERV3-2	2.15692	7.56256	8.4838	2.36e-10	1.21e-09	12.9418
CDCA7L	2.14309	6.63558	10.3223	1.17e-12	9.21e-12	18.3016
PCDHGA8	2.14277	5.59307	19.6191	1.12e-21	8.4e-20	39.287
DTL	2.1393	4.18376	15.2282	6.59e-18	1.69e-16	30.5291
SOX11	2.13849	4.23053	7.28217	9.36e-09	3.65e-08	9.23572
CCR5	2.13582	6.89148	12.6845	2.42e-15	3.35e-14	24.556
CLEC2B	2.13019	6.20021	12.3031	6.25e-15	7.93e-14	23.5943
FAM129A	2.12573	6.97019	13.3149	5.22e-16	8.5e-15	26.1066
NRG3	2.12396	4.20288	14.6715	2.26e-17	5.06e-16	29.2844
ABCA17P	2.11975	5.09035	8.55999	1.88e-10	9.76e-10	13.172
CPE	2.118	8.79228	5.54524	2.29e-06	6.15e-06	3.73711
STC2	2.11578	6.52256	12.9157	1.37e-15	2.01e-14	25.1303
CRTAM	2.11531	3.76752	9.26086	2.38e-11	1.46e-10	15.2578
ADA	2.11231	5.82188	11.3084	8.12e-14	8.11e-13	20.9997
RTP4	2.11053	6.68985	6.57577	8.64e-08	2.89e-07	7.00638
CSF2RB	2.10934	6.317	12.1363	9.52e-15	1.16e-13	23.1679
SRGN	2.10375	8.58258	14.9037	1.34e-17	3.18e-16	29.8077
TNFAIP3	2.09973	7.67845	14.7314	1.97e-17	4.51e-16	29.4201
LAMP3	2.09887	4.51059	13.4203	4.06e-16	6.83e-15	26.361
RNASE6	2.09855	7.62352	9.67762	7.16e-12	4.81e-11	16.4699
PNMA2	2.09427	6.20328	12.4293	4.55e-15	5.96e-14	23.9146
PDLIM1	2.08671	10.0939	17.5262	5.68e-20	2.67e-18	35.3314
TBXAS1	2.08661	5.16617	19.3937	1.68e-21	1.2e-19	38.8783
LINC00240	2.08229	4.22765	10.1512	1.88e-12	1.43e-11	17.8208
MLKL	2.0817	6.93431	20.3063	3.33e-22	2.9e-20	40.5087
FLT1	2.08126	6.90684	14.9187	1.3e-17	3.1e-16	29.8413
AIM2	2.08074	4.75403	9.34955	1.84e-11	1.15e-10	15.5175
ARRDC2	2.07897	7.66338	14.9892	1.11e-17	2.72e-16	29.9989
GPR4	2.0784	6.2466	16.1626	8.97e-19	2.92e-17	32.5446
2019-03-01	2.07254	4.72628	16.9227	1.89e-19	7.51e-18	34.1198
KRBA1	2.06953	7.40004	17.9248	2.61e-20	1.34e-18	36.1136
FOXJ3	2.06849	6.85098	8.41581	2.89e-10	1.46e-09	12.7359
MIR34A	2.06685	5.92406	21.0604	9.13e-23	9.25e-21	41.809
PF4V1	2.06557	3.57773	5.97531	5.82e-07	1.72e-06	5.09954
MICB	2.06221	5.27687	15.6558	2.62e-18	7.52e-17	31.4625
HCK	2.06037	6.45813	11.9041	1.72e-14	1.97e-13	22.5687
TOP2A	2.05765	3.76583	17.0831	1.37e-19	5.72e-18	34.4451
ADORA3	2.05515	5.04895	11.2543	9.37e-14	9.27e-13	20.8549
CCL4	2.05382	7.09118	7.85608	1.58e-09	7.04e-09	11.0225
GAPT	2.05009	4.00495	10.0574	2.45e-12	1.82e-11	17.5554
NNMT	2.04897	5.12356	9.01492	4.87e-11	2.83e-10	14.5325
SCG2	2.04801	4.19309	6.10729	3.82e-07	1.16e-06	5.51872
COL15A1	2.04773	8.19324	7.43066	5.89e-09	2.38e-08	9.70054
LINC01426	2.04614	3.5425	6.40596	1.48e-07	4.78e-07	6.46749
SFRP2	2.04613	5.74343	3.68962	0.000690717	0.00127373	-1.86906
COL6A3	2.04602	7.75492	6.23952	2.51e-07	7.82e-07	5.93882
ANXA4	2.04569	11.5674	20.1786	4.16e-22	3.56e-20	40.2844
FHL1	2.04171	8.3488	10.5886	5.62e-13	4.73e-12	19.0427
CD14	2.04161	8.8783	9.40939	1.55e-11	9.81e-11	15.6923
BTN3A2	2.04153	7.50527	10.2702	1.35e-12	1.05e-11	18.1556
CSF2RA	2.03614	4.89341	15.9306	1.46e-18	4.45e-17	32.0525
COL4A1	2.03294	9.71723	8.88615	7.12e-11	4e-10	14.1498
LOC154761	2.03071	6.35582	8.33796	3.66e-10	1.81e-09	12.4995
HK1	2.02992	8.58818	14.4032	4.13e-17	8.69e-16	28.6726
PCED1B	2.02549	5.56854	16.1673	8.88e-19	2.9e-17	32.5545
PSMB8	2.02539	8.52974	16.7756	2.54e-19	9.66e-18	33.8194
OSMR	2.0249	6.78328	11.642	3.39e-14	3.65e-13	21.884
BHLHE41	2.02117	5.16384	17.9783	2.36e-20	1.23e-18	36.2176
TLR1	2.01833	5.96622	11.1318	1.3e-13	1.25e-12	20.5258
HSPB8	2.01688	8.08033	10.2986	1.25e-12	9.79e-12	18.2352
S100A9	2.01329	7.5093	8.66118	1.39e-10	7.39e-10	13.4767
MS4A6A	2.0047	7.01631	14.0427	9.43e-17	1.86e-15	27.8377
LIPA	2.00411	10.4208	17.0824	1.37e-19	5.72e-18	34.4437
GAL3ST1	2.00249	8.38625	9.44659	1.39e-11	8.9e-11	15.8006
GNA15	1.99964	5.35249	14.8858	1.4e-17	3.3e-16	29.7675
ACKR3	1.99937	5.79001	10.8487	2.77e-13	2.48e-12	19.7577
PABPC4L	1.99808	6.19855	9.37365	1.71e-11	1.08e-10	15.588
LOC285812	1.99668	5.92504	10.5323	6.55e-13	5.45e-12	18.8868
MGC70870	1.99631	5.54347	19.9079	6.7e-22	5.49e-20	39.8047
FCGR2B	1.99231	5.94865	6.8437	3.7e-08	1.32e-07	7.85482
MS4A14	1.98978	4.96481	10.5143	6.89e-13	5.69e-12	18.8368
MEF2C	1.98482	7.13395	17.2261	1.03e-19	4.48e-18	34.7333
GJC1	1.98456	5.03541	9.84449	4.45e-12	3.13e-11	16.9491
VCAM1	1.98192	10.7708	8.90233	6.79e-11	3.83e-10	14.198
LOC101929705	1.98137	4.55636	13.7056	2.07e-16	3.73e-15	27.0436
FN1	1.97952	7.94894	10.2901	1.28e-12	1e-11	18.2114
RAB42	1.97612	6.77669	6.73301	5.25e-08	1.82e-07	7.50466
HLA-DMB	1.97566	9.17138	14.2222	6.24e-17	1.27e-15	28.2553
SH2B3	1.97458	7.52055	15.2091	6.87e-18	1.75e-16	30.487
NCKAP1L	1.97158	6.10992	16.7829	2.5e-19	9.58e-18	33.8343
SIRPB2	1.96887	4.55546	18.7077	5.93e-21	3.59e-19	37.6095
FXYD5	1.96852	7.51582	13.4027	4.23e-16	7.1e-15	26.3187
BAZ1A	1.96743	6.87512	18.2896	1.3e-20	7.38e-19	36.8172
HLA-F	1.96725	9.33504	18.5746	7.6e-21	4.51e-19	37.3588
CLIC2	1.96549	6.11154	15.1436	7.93e-18	1.99e-16	30.342
VAV1	1.96507	5.4597	14.7426	1.92e-17	4.42e-16	29.4453
APOBEC3B	1.9626	4.31619	10.0148	2.76e-12	2.03e-11	17.4346
TNFAIP8L2	1.96219	5.21266	18.1136	1.82e-20	9.83e-19	36.4792
DUSP4	1.96044	5.03452	12.8135	1.76e-15	2.51e-14	24.8773
SLA	1.95609	7.25641	10.876	2.57e-13	2.32e-12	19.8322
NLRC5	1.95535	6.77044	13.3902	4.36e-16	7.3e-15	26.2885
BC036055 /// PREX2	1.95439	4.27864	10.713	4e-13	3.48e-12	19.3856
TUBB6	1.9524	8.07775	12.0959	1.06e-14	1.27e-13	23.0641
TREM2	1.9522	6.94483	11.8126	2.18e-14	2.43e-13	22.3306
PTPRC	1.95174	5.50623	14.3527	4.63e-17	9.67e-16	28.5565
PSMB9	1.95148	8.23548	11.9126	1.68e-14	1.93e-13	22.5907
FAM198B	1.95025	6.57161	10.8348	2.88e-13	2.57e-12	19.7197
ADORA2B	1.94928	4.67449	12.0453	1.2e-14	1.43e-13	22.9339
SPARC	1.94885	10.5784	9.07647	4.07e-11	2.39e-10	14.7147
ITGAM	1.94683	6.63996	13.218	6.59e-16	1.04e-14	25.8714
GNLY	1.94568	4.8888	13.3043	5.35e-16	8.68e-15	26.0808
VSIG4	1.94267	8.10975	8.41348	2.91e-10	1.47e-09	12.7289
MARCKS	1.93577	8.07555	12.7329	2.14e-15	3.01e-14	24.6767
GIMAP2	1.93481	7.09551	10.788	3.26e-13	2.89e-12	19.5916
ELTD1	1.93292	8.3376	7.87802	1.48e-09	6.62e-09	11.0902
PRC1	1.93259	5.21181	15.5999	2.95e-18	8.36e-17	31.3417
RAB37	1.93114	4.53609	22.2022	1.38e-23	1.83e-21	43.7023
NLRC3	1.92862	5.3069	12.7315	2.15e-15	3.02e-14	24.6732
TMEM100	1.92766	5.15819	4.25193	0.0001299	0.000268342	-0.247706
ALOX5AP	1.92664	7.90934	7.93799	1.23e-09	5.59e-09	11.2751
CENPH	1.92605	4.62888	26.6017	1.96e-26	5.66e-24	50.256
PCDHB15	1.92479	4.27417	6.03647	4.79e-07	1.43e-06	5.29376
NCF4	1.92376	5.80562	10.2657	1.37e-12	1.06e-11	18.143
CD300A	1.9229	5.07003	19.7688	8.58e-22	6.71e-20	39.5561
IFI44L	1.92234	7.58523	9.42452	1.48e-11	9.43e-11	15.7363
GGTA1P	1.92163	7.71089	10.3515	1.08e-12	8.57e-12	18.3833
ERO1L	1.92163	7.57498	17.8214	3.19e-20	1.59e-18	35.9122
CHST9	1.91826	5.20062	6.7653	4.74e-08	1.66e-07	7.60686
KIAA0226L	1.91824	4.97072	11.2091	1.06e-13	1.03e-12	20.7338
TMSB10	1.91548	12.3342	22.209	1.37e-23	1.82e-21	43.7132
BUB1B	1.91517	4.7103	13.855	1.46e-16	2.72e-15	27.3971
HTRA4	1.91366	4.13713	7.93547	1.24e-09	5.63e-09	11.2674
FAP	1.90953	4.82253	10.3041	1.23e-12	9.65e-12	18.2506
IL2RG	1.90694	5.88222	10.5063	7.04e-13	5.8e-12	18.8147
HEY1	1.90404	7.60994	8.33323	3.71e-10	1.83e-09	12.4851
CEBPB	1.90371	10.2395	8.33863	3.65e-10	1.8e-09	12.5016
TRIM22	1.90325	9.15561	13.1666	7.45e-16	1.16e-14	25.746
MSR1	1.90292	4.64292	13.8674	1.42e-16	2.66e-15	27.4263
GXYLT2	1.9025	5.67044	6.5122	1.06e-07	3.49e-07	6.80473
HRH1	1.90081	5.19429	22.2176	1.35e-23	1.81e-21	43.7272
REG1A	1.89964	6.56398	3.41961	0.00149403	0.00261142	-2.60921
JAZF1	1.89867	5.89067	18.2378	1.44e-20	7.97e-19	36.718
IGLL5	1.89433	6.17943	6.15489	3.29e-07	1.01e-06	5.66993
COL4A2	1.89407	9.37922	8.41255	2.92e-10	1.47e-09	12.726
H2BFS	1.89126	7.42368	11.5662	4.13e-14	4.38e-13	21.6843
HLA-G	1.89109	10.5415	23.0057	3.86e-24	6.64e-22	44.9832
RPA4	1.89039	4.13005	16.1082	1e-18	3.22e-17	32.4298
VWCE	1.88991	5.99236	11.8543	1.96e-14	2.2e-13	22.4391
DOC2A	1.8859	5.82315	9.90446	3.76e-12	2.68e-11	17.1205
P2RY12	1.88574	3.74359	9.31279	2.04e-11	1.27e-10	15.41
SLC6A1	1.88172	4.95943	5.91959	6.95e-07	2.02e-06	4.92265
BEST4	1.87842	3.94303	9.67335	7.24e-12	4.86e-11	16.4576
CD93	1.87632	8.47395	10.9274	2.24e-13	2.04e-12	19.9721
TRIM9	1.87628	4.32138	15.8347	1.79e-18	5.37e-17	31.8474
RARRES2	1.87494	9.96061	8.95041	5.89e-11	3.35e-10	14.341
TEX11	1.87414	4.52711	6.74759	5.02e-08	1.75e-07	7.55081
NUSAP1	1.87326	5.74577	12.125	9.8e-15	1.19e-13	23.1388
MYOF	1.871	7.99949	14.9495	1.22e-17	2.93e-16	29.9102
HHEX	1.87069	5.51332	10.9706	2e-13	1.84e-12	20.0895
GPNMB	1.86872	7.39494	5.6002	1.92e-06	5.22e-06	3.91076
DUSP5P1	1.86708	3.58454	11.3388	7.49e-14	7.55e-13	21.0809
CCR6	1.86614	3.91865	8.0678	8.29e-10	3.86e-09	11.6743
IRF2	1.86555	6.38998	22.0331	1.82e-23	2.33e-21	43.4274
SIGLEC10	1.862	5.26704	17.3204	8.51e-20	3.79e-18	34.9222
CXCL13	1.8614	3.65971	4.74485	2.85e-05	6.5e-05	1.24037
GPR171	1.86125	4.59049	7.69328	2.61e-09	1.12e-08	10.5184
EVI2B	1.85947	7.03145	9.74962	5.83e-12	3.99e-11	16.6771
GMFG	1.85809	7.55544	19.8174	7.87e-22	6.25e-20	39.6432
TCF4	1.85728	7.74397	11.0485	1.62e-13	1.52e-12	20.3007
TM4SF18	1.85683	8.29077	13.931	1.22e-16	2.34e-15	27.576
LAX1	1.8556	4.55689	9.06877	4.16e-11	2.44e-10	14.6919
PSMB10	1.85468	7.34137	14.5251	3.14e-17	6.75e-16	28.9517
MS4A4A	1.85462	7.11258	8.70991	1.2e-10	6.47e-10	13.623
COL1A1	1.85307	6.95248	8.74067	1.1e-10	5.95e-10	13.7152
NRARP	1.85249	7.22449	9.23743	2.54e-11	1.55e-10	15.189
IL32	1.85064	9.33274	7.64324	3.05e-09	1.29e-08	10.363
SCARB1	1.84931	5.48807	18.2157	1.5e-20	8.22e-19	36.6755
LOC101928173	1.84829	4.28129	12.5025	3.79e-15	5.05e-14	24.0993
C6orf223	1.84811	6.09399	13.2403	6.24e-16	9.95e-15	25.9254
LRP4	1.84699	5.66659	10.6867	4.3e-13	3.72e-12	19.3133
S1PR1	1.8438	7.32221	10.5751	5.83e-13	4.89e-12	19.0054
PSTPIP1	1.84367	5.14452	15.5651	3.18e-18	8.87e-17	31.2662
CDH5	1.84297	7.38062	8.38855	3.14e-10	1.57e-09	12.6532
FZD1	1.84295	6.4639	14.9475	1.22e-17	2.93e-16	29.9058
OLR1	1.84248	5.46313	5.76988	1.12e-06	3.15e-06	4.44784
ISG20	1.84139	6.18048	10.4698	7.78e-13	6.35e-12	18.7131
DOCK10	1.84058	4.74825	17.2467	9.85e-20	4.34e-18	34.7746
EBF2	1.83863	4.05328	11.8912	1.78e-14	2.03e-13	22.5352
ARL4A	1.83831	7.52397	15.8871	1.6e-18	4.84e-17	31.9597
RASD2	1.8362	4.95071	13.3241	5.11e-16	8.36e-15	26.1288
GPX8	1.83164	6.41224	8.05401	8.65e-10	4.02e-09	11.632
PECAM1	1.83053	7.90135	14.2892	5.36e-17	1.1e-15	28.4103
EMP3	1.82685	8.02651	14.7991	1.7e-17	3.94e-16	29.5728
CEBPD	1.82006	8.77413	10.6112	5.28e-13	4.48e-12	19.1052
CD3D	1.81852	6.48999	8.71388	1.19e-10	6.41e-10	13.6349
KCNE4	1.81444	4.82185	9.4936	1.21e-11	7.84e-11	15.9374
ALOX5	1.81003	5.71145	11.9314	1.61e-14	1.85e-13	22.6395
LHFPL2	1.80921	7.14368	9.76731	5.54e-12	3.82e-11	16.7279
PLCB4	1.80894	6.66253	7.94115	1.22e-09	5.54e-09	11.2849
MTCL1	1.80727	7.60289	9.6659	7.4e-12	4.96e-11	16.4361
CKAP2L	1.80623	3.90968	28.6983	1.21e-27	5.47e-25	53.0274
HLA-B	1.80616	12.1283	17.7886	3.4e-20	1.67e-18	35.8479
CD97	1.80558	7.47477	14.3889	4.27e-17	8.94e-16	28.6398
BTN3A3	1.80546	7.04739	13.9223	1.25e-16	2.38e-15	27.5555
AMICA1	1.80118	6.33784	15.8117	1.88e-18	5.6e-17	31.7983
LOC101928054	1.79994	4.70135	16.0794	1.07e-18	3.4e-17	32.3688
KIAA1462	1.79829	6.06336	9.1321	3.46e-11	2.06e-10	14.8789
ABCC3	1.79768	7.5215	16.6838	3.06e-19	1.14e-17	33.6307
EDNRA	1.79655	5.79372	6.93228	2.8e-08	1.02e-07	8.13467
LCK	1.79444	5.83376	9.76262	5.62e-12	3.86e-11	16.7145
ASPHD1	1.79205	5.66956	13.5384	3.07e-16	5.31e-15	26.6448
ELMO1	1.79058	5.59654	14.6943	2.14e-17	4.84e-16	29.3361
KLHL6	1.78953	4.19462	13.6861	2.16e-16	3.88e-15	26.9972
SCGN	1.78832	6.19767	4.8981	1.76e-05	4.17e-05	1.71228
CRIP1	1.78615	7.56096	6.78378	4.47e-08	1.57e-07	7.66533
TRG-AS1	1.78603	4.67623	12.6273	2.78e-15	3.81e-14	24.4129
PREX1	1.78533	7.24081	17.8515	3.01e-20	1.52e-18	35.9708
PHKA2	1.78294	7.13685	22.3978	1.01e-23	1.47e-21	44.0179
RRAD	1.78266	6.19455	8.46931	2.46e-10	1.25e-09	12.898
TMEM130	1.77858	5.23954	4.37719	8.87e-05	0.000187892	0.12546
CLEC14A	1.7758	6.98359	8.37025	3.32e-10	1.65e-09	12.5977
TAP1	1.77524	8.07292	13.2161	6.62e-16	1.05e-14	25.8667
PTGS1	1.77317	6.46361	5.04002	1.13e-05	2.74e-05	2.15239
PNCK	1.77148	6.57693	6.36544	1.68e-07	5.38e-07	6.33879
COL5A2	1.76917	7.02065	8.35672	3.45e-10	1.71e-09	12.5566
HLA-DQA1	1.76839	7.62295	2.66352	0.0112209	0.0170875	-4.50452
ZNF680	1.76702	5.92037	20.1565	4.32e-22	3.66e-20	40.2454
LINGO1	1.76474	5.94869	14.4771	3.49e-17	7.46e-16	28.842
RAB31	1.76469	8.42238	13.7726	1.77e-16	3.23e-15	27.2025
ANXA2R	1.76361	5.80539	13.0847	9.08e-16	1.38e-14	25.546
CST7	1.76315	5.98411	9.08063	4.02e-11	2.36e-10	14.727
TNFAIP8	1.76208	6.68831	11.6883	3e-14	3.28e-13	22.0056
IL20RB	1.7586	4.96652	3.34765	0.00182766	0.0031542	-2.80146
TPSB2	1.755	6.43114	6.75833	4.85e-08	1.69e-07	7.58479
NMU	1.75252	4.12434	5.87608	7.98e-07	2.3e-06	4.7846
PBK	1.75224	3.86639	9.24518	2.49e-11	1.52e-10	15.2118
CPA3	1.75157	6.34531	5.33711	4.42e-06	1.14e-05	3.08145
CDK18	1.75081	7.60527	9.94027	3.4e-12	2.45e-11	17.2226
TSPAN13	1.74777	8.05884	9.64649	7.82e-12	5.23e-11	16.3801
FKBP10	1.74379	5.77457	7.77849	2.01e-09	8.78e-09	10.7825
SASH3	1.7426	5.71191	10.6928	4.23e-13	3.66e-12	19.3302
UBE2C	1.73886	5.38592	18.0931	1.89e-20	1.02e-18	36.4396
SPIRE1	1.73635	6.82471	18.5442	8.05e-21	4.76e-19	37.3014
NCF2	1.73527	6.11036	9.69597	6.79e-12	4.59e-11	16.5228
STC1	1.7348	7.92729	6.34463	1.8e-07	5.72e-07	6.27272
ITGAL	1.73455	5.59657	10.8578	2.7e-13	2.43e-12	19.7823
RHOH	1.73362	4.88825	9.86375	4.22e-12	2.98e-11	17.0042
LCP1	1.73284	7.52413	12.4397	4.44e-15	5.82e-14	23.9407
EHD2	1.7298	7.60013	18.2996	1.28e-20	7.27e-19	36.8364
CXCL16	1.72443	7.46836	11.6277	3.52e-14	3.78e-13	21.8464
CALCRL	1.72268	6.05795	9.06473	4.21e-11	2.46e-10	14.6799
ASAP1-IT1	1.71994	5.76202	12.575	3.17e-15	4.29e-14	24.2817
MTFP1	1.71895	8.07507	20.3338	3.17e-22	2.79e-20	40.5569
RIMKLA	1.71633	4.59202	16.3536	6.03e-19	2.05e-17	32.9457
GNB4	1.71503	6.329	22.1486	1.51e-23	1.96e-21	43.6153
SPARCL1	1.71495	10.5397	6.28172	2.2e-07	6.9e-07	6.07288
S100A10	1.71376	8.99341	10.3807	9.94e-13	7.95e-12	18.4651
CD8A	1.71316	6.28374	5.43752	3.22e-06	8.44e-06	3.39736
SSPN	1.71315	5.65604	15.7158	2.3e-18	6.71e-17	31.592
FLNA	1.71279	8.49906	9.68274	7.05e-12	4.75e-11	16.4847
FAM26F	1.71262	4.98878	9.16513	3.14e-11	1.89e-10	14.9763
TRIB3	1.7111	6.12648	10.8153	3.03e-13	2.7e-12	19.6662
KCNK6	1.71082	4.77183	17.0535	1.45e-19	6.02e-18	34.3853
LOC100507535	1.71025	5.69623	15.7055	2.35e-18	6.84e-17	31.5699
DPYSL2	1.70838	10.6889	13.5427	3.04e-16	5.26e-15	26.6552
PCDHB6	1.70764	4.79359	6.95674	2.59e-08	9.47e-08	8.21187
TCIRG1	1.70713	6.892	13.7262	1.97e-16	3.57e-15	27.0926
NINJ2	1.70315	4.8655	15.7272	2.25e-18	6.56e-17	31.6167
HLA-DQB1	1.70236	6.1126	5.55084	2.25e-06	6.05e-06	3.75478
C4orf6	1.7006	4.09475	6.91544	2.95e-08	1.07e-07	8.08149
CD70	1.69565	6.93042	9.5819	9.41e-12	6.2e-11	16.1934
ARL4C	1.69557	6.58109	10.0828	2.28e-12	1.7e-11	17.6274
CFP	1.695	4.64716	20.5287	2.26e-22	2.07e-20	40.8964
GPAT2	1.6948	5.35956	10.9782	1.96e-13	1.81e-12	20.1103
RPL36	1.69087	10.5198	12.1132	1.01e-14	1.22e-13	23.1086
LOC100288152	1.6873	7.17313	5.74505	1.21e-06	3.4e-06	4.36915
BTN3A1	1.68588	7.07575	16.1116	9.98e-19	3.2e-17	32.4369
RGS5	1.68497	8.04038	5.89201	7.58e-07	2.19e-06	4.83514
HK2	1.68232	4.93596	15.8244	1.83e-18	5.46e-17	31.8254
LDHA	1.68128	12.6087	22.187	1.42e-23	1.86e-21	43.6776
FAM110C	1.67974	9.20054	11.8287	2.09e-14	2.34e-13	22.3725
TNAP	1.67756	5.00535	22.8354	5.04e-24	8.26e-22	44.7152
INPP5D	1.67726	5.47348	21.1824	7.43e-23	7.85e-21	42.0155
MAN2B1	1.67717	7.60949	13.808	1.63e-16	3e-15	27.2863
HPCAL1	1.67543	9.15599	10.449	8.24e-13	6.7e-12	18.6554
FOXF1	1.67159	5.80221	7.33388	7.96e-09	3.15e-08	9.39775
PDGFD	1.66923	6.63678	7.12471	1.53e-08	5.79e-08	8.74114
TUBA1A	1.66824	10.7569	10.5289	6.61e-13	5.49e-12	18.8774
SCG5	1.66677	4.05513	5.67414	1.52e-06	4.19e-06	4.14461
ZNF611	1.665	6.23378	29.8582	2.79e-28	1.63e-25	54.4774
FSCN1	1.66492	5.65385	9.01152	4.92e-11	2.85e-10	14.5224
TIMD4	1.66382	4.48476	5.42151	3.39e-06	8.86e-06	3.34692
FGFBP2	1.66366	4.0389	10.4139	9.08e-13	7.32e-12	18.5575
IL10RB	1.66337	7.66656	16.0703	1.09e-18	3.45e-17	32.3495
LINC00173	1.66327	5.71938	11.0127	1.78e-13	1.66e-12	20.204
DUXAP10	1.66325	3.78433	6.86596	3.45e-08	1.23e-07	7.92519
SLC15A3	1.66268	6.88709	16.373	5.79e-19	1.98e-17	32.9863
HMCN1	1.66213	6.3634	5.57724	2.06e-06	5.59e-06	3.8382
SPSB1	1.65886	6.09096	6.74511	5.05e-08	1.76e-07	7.54294
FYB	1.65866	5.44773	10.4245	8.81e-13	7.13e-12	18.5871
GLUL	1.65814	8.11693	9.05846	4.29e-11	2.5e-10	14.6614
GBP1	1.65749	7.22541	8.19198	5.68e-10	2.72e-09	12.0545
SYNM	1.65705	7.55221	8.77695	9.83e-11	5.39e-10	13.8238
ATHL1	1.65684	7.43163	6.50463	1.08e-07	3.57e-07	6.7807
GBP4	1.65587	5.50087	11.0599	1.57e-13	1.48e-12	20.3317
FILIP1	1.65526	4.59432	8.07956	8e-10	3.74e-09	11.7103
C4orf47	1.65239	6.40126	14.8524	1.51e-17	3.52e-16	29.6925
HIGD1B	1.65231	6.00393	8.14264	6.6e-10	3.12e-09	11.9036
CD33	1.65019	5.52341	15.2292	6.58e-18	1.69e-16	30.5312
PXDN	1.64892	7.28184	9.20632	2.78e-11	1.69e-10	15.0976
CMPK2	1.64838	6.55182	10.1742	1.76e-12	1.34e-11	17.8855
PIK3CG	1.64654	4.41922	16.8778	2.06e-19	8.13e-18	34.0284
HSPG2	1.64581	7.62741	9.45932	1.34e-11	8.6e-11	15.8377
ARPC1B	1.64379	9.13538	10.5321	6.56e-13	5.46e-12	18.8862
ANGPTL2	1.64115	6.13304	9.46373	1.32e-11	8.49e-11	15.8505
FCN1	1.64007	5.6271	8.10466	7.41e-10	3.48e-09	11.7873
TRIM55	1.63971	5.9775	10.3564	1.06e-12	8.46e-12	18.3971
PGBD5	1.63951	6.15181	6.29582	2.1e-07	6.62e-07	6.11768
THBS2	1.63822	7.6705	3.63272	0.000814209	0.0014825	-2.02739
SORCS3	1.63813	3.93757	3.57849	0.000951497	0.00171433	-2.17712
CFD	1.63735	7.29381	7.08546	1.73e-08	6.5e-08	8.61761
ANKRD36B	1.6371	7.65322	8.04868	8.79e-10	4.08e-09	11.6156
CDC7	1.63671	4.98984	11.0025	1.83e-13	1.7e-12	20.1762
CHST15	1.63536	6.66523	11.7058	2.87e-14	3.14e-13	22.0513
BCL11A	1.63351	4.97574	10.2896	1.28e-12	1e-11	18.2099
KCNE3	1.63303	7.04957	8.24396	4.86e-10	2.35e-09	12.2132
COL8A1	1.63283	4.49842	10.1093	2.11e-12	1.59e-11	17.7023
EOGT	1.63262	6.4746	9.15589	3.23e-11	1.93e-10	14.9491
TMEM44	1.63262	5.57978	12.6106	2.9e-15	3.96e-14	24.3711
RNF125	1.62953	5.61428	12.4561	4.26e-15	5.6e-14	23.9823
DUSP1	1.62931	8.67073	11.7772	2.39e-14	2.65e-13	22.2382
LILRA6	1.6283	5.32417	20.7288	1.6e-22	1.53e-20	41.2422
APCDD1	1.62779	6.14917	5.1873	7.1e-06	1.77e-05	2.61179
TMEM71	1.62697	5.12689	11.0559	1.59e-13	1.49e-12	20.3208
RAB38	1.62558	6.86928	15.3186	5.41e-18	1.43e-16	30.7281
EHBP1L1	1.62543	5.61728	19.1138	2.8e-21	1.84e-19	38.3652
ABCG1	1.6253	6.32047	12.3486	5.57e-15	7.14e-14	23.7099
PRND	1.62362	4.18298	7.33546	7.93e-09	3.13e-08	9.40272
GZMH	1.62332	5.31058	8.45244	2.59e-10	1.31e-09	12.8469
LAMA4	1.62325	5.06427	18.5154	8.49e-21	5e-19	37.247
PMEPA1	1.62288	7.44311	8.09056	7.74e-10	3.62e-09	11.7441
CHSY3	1.62131	4.60677	10.4141	9.07e-13	7.32e-12	18.5582
MAP4K4	1.61822	6.53389	18.8038	4.96e-21	3.11e-19	37.7896
VMP1	1.61814	7.96983	6.12124	3.66e-07	1.11e-06	5.56305
ANLN	1.6176	3.6216	10.6854	4.31e-13	3.73e-12	19.3098
NAMPT	1.61738	8.25659	8.15674	6.33e-10	3e-09	11.9468
TAGLN2	1.61548	8.90234	16.4591	4.85e-19	1.7e-17	33.1658
IGBP1	1.61463	8.90885	22.826	5.11e-24	8.31e-22	44.7002
KIAA0101	1.6124	5.46107	13.9887	1.07e-16	2.09e-15	27.7114
MATN1-AS1	1.61213	3.92119	22.2976	1.19e-23	1.68e-21	43.8565
PRUNE2	1.6121	7.78926	8.64371	1.46e-10	7.74e-10	13.4241
MILR1	1.61094	4.4989	14.6022	2.64e-17	5.77e-16	29.1272
PTRF	1.60903	7.57256	11.0366	1.67e-13	1.57e-12	20.2686
OGFRL1	1.60855	6.83949	9.98999	2.95e-12	2.16e-11	17.3641
OR51E1	1.6082	4.74209	7.20481	1.19e-08	4.58e-08	8.99294
CENPK	1.60694	3.65222	14.7311	1.97e-17	4.51e-16	29.4194
TNFSF9	1.6036	4.51043	15.0154	1.05e-17	2.58e-16	30.0574
LOC100506498	1.60076	7.93731	4.48966	6.28e-05	0.000136175	0.46362
SLC15A4	1.59975	6.70768	24.6044	3.39e-25	7.55e-23	47.4155
CPNE5	1.5979	4.65456	10.0377	2.58e-12	1.91e-11	17.4995
RECQL	1.59627	7.75488	16.6226	3.47e-19	1.27e-17	33.5046
CENPU	1.59484	4.72092	13.6501	2.36e-16	4.18e-15	26.9117
COL6A2	1.59441	7.2176	11.5537	4.26e-14	4.5e-13	21.6513
KCNK17	1.59438	4.20463	17.0923	1.34e-19	5.63e-18	34.4637
CNRIP1	1.5942	7.45832	8.28984	4.23e-10	2.07e-09	12.3531
PRDX4	1.59378	10.1097	13.5303	3.13e-16	5.4e-15	26.6253
FRMD6	1.59291	6.55658	6.57771	8.58e-08	2.87e-07	7.01253
EDIL3	1.59209	5.8924	7.28808	9.19e-09	3.59e-08	9.25423
S100A8	1.5919	6.3767	6.60876	7.78e-08	2.62e-07	7.111
CELF2	1.58939	5.51702	14.9841	1.13e-17	2.75e-16	29.9874
SLAMF8	1.58888	5.50885	7.65881	2.91e-09	1.24e-08	10.4114
LSP1	1.5866	5.99198	10.7255	3.87e-13	3.38e-12	19.4199
NOD2	1.5859	4.82459	10.5496	6.25e-13	5.22e-12	18.9346
PRR11	1.58519	7.99403	28.6835	1.23e-27	5.47e-25	53.0086
SLITRK5	1.58517	3.76292	5.29872	5e-06	1.27e-05	2.96089
LINC01268	1.58458	5.70323	8.24657	4.82e-10	2.33e-09	12.2212
AQP9	1.58309	6.14016	4.21365	0.000145885	0.000298861	-0.360978
OAS2	1.5813	4.7085	16.9439	1.81e-19	7.21e-18	34.1629
SNORD89	1.58125	6.42091	16.3899	5.59e-19	1.93e-17	33.0216
CHST11	1.58005	5.73738	10.1834	1.72e-12	1.31e-11	17.9114
LST1	1.57888	6.58348	13.4644	3.65e-16	6.24e-15	26.4673
LOC101928335	1.57798	4.01919	8.07911	8.01e-10	3.74e-09	11.709
PLXDC1	1.5772	5.96287	9.73175	6.13e-12	4.18e-11	16.6257
AFAP1L1	1.57689	5.78931	14.5174	3.19e-17	6.85e-16	28.9341
NDC80	1.57516	4.54347	10.5131	6.91e-13	5.71e-12	18.8335
FAIM3	1.57494	5.53878	16.3849	5.65e-19	1.95e-17	33.0111
XAF1	1.57314	6.96424	13.6653	2.27e-16	4.06e-15	26.9479
E2F8	1.57248	3.35086	8.66255	1.38e-10	7.36e-10	13.4808
CRNDE	1.57235	7.61229	6.49019	1.13e-07	3.72e-07	6.73487
CD200	1.57229	7.08459	10.516	6.85e-13	5.67e-12	18.8415
MYO3A	1.57184	3.71175	16.2995	6.74e-19	2.27e-17	32.8324
CSF1R	1.57087	7.88621	8.53329	2.03e-10	1.05e-09	13.0914
CD38	1.56977	4.69743	7.45537	5.46e-09	2.21e-08	9.77771
SAMSN1	1.56891	4.97665	9.00272	5.05e-11	2.91e-10	14.4963
DUSP10	1.56712	5.23487	12.4745	4.07e-15	5.38e-14	24.0288
UCN	1.56605	5.08473	19.2052	2.37e-21	1.6e-19	38.5334
BCAT1	1.56541	5.38308	7.84999	1.61e-09	7.16e-09	11.0037
CXCL3	1.56326	4.62413	8.59955	1.67e-10	8.74e-10	13.2912
C3AR1	1.56177	8.0287	9.01833	4.82e-11	2.8e-10	14.5426
MYBL1	1.55951	5.08091	11.0419	1.65e-13	1.55e-12	20.2829
LOC221272	1.55847	4.81883	12.4586	4.23e-15	5.58e-14	23.9885
GUCY1A3	1.5583	7.8363	10.2583	1.4e-12	1.08e-11	18.1221
IFI44	1.5579	6.37526	14.8032	1.68e-17	3.91e-16	29.5819
ANXA1	1.5573	6.20089	9.83557	4.57e-12	3.2e-11	16.9236
GPR64	1.55605	4.12045	3.29693	0.00210438	0.00359542	-2.93564
IGSF21	1.55499	4.85135	9.97383	3.09e-12	2.25e-11	17.3181
MMRN1	1.55497	3.7007	4.91614	1.67e-05	3.95e-05	1.76807
GLYATL2	1.55269	3.67445	22.0041	1.91e-23	2.43e-21	43.38
WDR54	1.55182	8.52749	16.4847	4.6e-19	1.63e-17	33.219
PCDHGA4	1.55096	5.25658	5.6091	1.87e-06	5.09e-06	3.93887
BC069782 /// STAMBPL1	1.55058	4.80651	17.5062	5.9e-20	2.75e-18	35.2918
FLJ32255	1.55039	4.55411	10.2679	1.36e-12	1.06e-11	18.1491
VSIG1	1.54778	3.81335	10.898	2.43e-13	2.19e-12	19.8922
FNDC3B	1.54715	3.70465	14.2787	5.49e-17	1.12e-15	28.3859
CLEC2D	1.54648	3.84782	19.8899	6.92e-22	5.62e-20	39.7727
RGCC	1.54599	6.58738	8.12735	6.92e-10	3.26e-09	11.8568
IL21R	1.54388	4.07667	11.8884	1.79e-14	2.04e-13	22.528
PLIN2	1.54289	7.75601	15.0551	9.63e-18	2.38e-16	30.1456
TMEM173	1.54195	7.08512	13.4532	3.75e-16	6.38e-15	26.4403
DDX26B	1.54125	6.42664	12.0038	1.33e-14	1.57e-13	22.8268
OLFML2A	1.54114	7.75025	4.41905	7.8e-05	0.000166677	0.251007
FGR	1.54093	6.35181	11.3459	7.35e-14	7.43e-13	21.0998
CCDC109B	1.54073	6.26078	9.28549	2.21e-11	1.37e-10	15.33
HLX	1.54041	6.7822	9.47804	1.27e-11	8.16e-11	15.8921
KLF10	1.54008	9.64647	8.27451	4.43e-10	2.16e-09	12.3064
PCDHB16	1.53942	4.98042	4.80479	2.36e-05	5.47e-05	1.42449
FKBP11	1.53883	6.93519	8.76457	1.02e-10	5.58e-10	13.7867
SLC17A4	1.53779	4.64896	7.46445	5.31e-09	2.15e-08	9.80606
HLA-DRB1 /// HLA-DRB1	1.53539	11.864	13.336	4.96e-16	8.18e-15	26.1577
RASSF5	1.5352	5.72648	13.9052	1.3e-16	2.46e-15	27.5154
FAM101B	1.53288	8.09371	8.39744	3.06e-10	1.53e-09	12.6802
INSIG2	1.531	8.7643	12.9391	1.29e-15	1.91e-14	25.1881
SLC27A3	1.53057	7.02471	9.218	2.69e-11	1.64e-10	15.1319
PLAUR	1.52698	6.08908	7.70355	2.53e-09	1.09e-08	10.5503
NUCB2	1.52694	7.27344	12.5631	3.26e-15	4.4e-14	24.2518
MTHFD2	1.52274	5.64961	10.6913	4.25e-13	3.67e-12	19.3259
REG1B	1.52171	4.45772	3.72582	0.000621803	0.00115496	-1.76776
LOC101928554	1.52128	3.90919	5.79504	1.03e-06	2.92e-06	4.52758
DIAPH2	1.51958	5.91264	14.1886	6.74e-17	1.36e-15	28.1774
P4HB	1.51898	9.66125	9.62016	8.43e-12	5.61e-11	16.3041
EVA1C	1.5167	6.81252	7.67789	2.74e-09	1.17e-08	10.4706
ITGA5	1.51511	7.75001	10.6831	4.34e-13	3.75e-12	19.3034
POLE2	1.51473	4.88954	14.9833	1.13e-17	2.75e-16	29.9858
CFH	1.51184	6.71001	4.11896	0.000194147	0.00039062	-0.639541
HCP5	1.51099	6.74909	9.48167	1.25e-11	8.09e-11	15.9027
LCP2	1.5108	4.92205	14.8577	1.49e-17	3.49e-16	29.7044
LOC101928152	1.51011	4.89907	5.43666	3.23e-06	8.46e-06	3.39466
MSC	1.5094	4.97318	11.0876	1.46e-13	1.38e-12	20.4064
RNASE2	1.50817	4.45211	7.63253	3.15e-09	1.33e-08	10.3297
NCAPG	1.50816	3.49154	14.2816	5.45e-17	1.12e-15	28.3926
ZNF320	1.50807	7.34076	7.42572	5.98e-09	2.41e-08	9.68509
RASSF6	1.50786	6.64696	9.83905	4.52e-12	3.17e-11	16.9336
NUPR1	1.50781	9.00411	9.20953	2.76e-11	1.67e-10	15.107
SFR1	1.5075	6.3645	11.0174	1.76e-13	1.64e-12	20.2167
C3orf70	1.50741	4.85262	8.16343	6.2e-10	2.95e-09	11.9673
ARHGAP9	1.50479	5.9029	11.9816	1.41e-14	1.65e-13	22.7693
FPR1	1.50291	5.34201	9.42038	1.5e-11	9.53e-11	15.7243
NMB	1.50234	7.77821	7.9082	1.35e-09	6.08e-09	11.1833
SNAP25	1.50168	5.01249	8.9818	5.37e-11	3.09e-10	14.4342
ICAM1	1.50011	6.64925	12.6065	2.93e-15	4e-14	24.3607
CXCL8	1.50004	5.33254	4.29342	0.000114508	0.000238519	-0.124515
SIGLEC1	1.49917	5.97075	10.8206	2.99e-13	2.66e-12	19.6808
PDGFRB	1.49619	7.33757	5.58856	1.99e-06	5.41e-06	3.87397
C5AR1	1.49528	7.14574	7.16734	1.34e-08	5.11e-08	8.87519
TMEM87B	1.49483	6.17834	16.8362	2.24e-19	8.77e-18	33.9434
EMR2	1.49461	4.44377	14.3333	4.84e-17	1.01e-15	28.5118
RPL39L	1.49421	4.97587	12.4752	4.06e-15	5.38e-14	24.0305
CD40	1.49345	6.51849	16.8049	2.39e-19	9.28e-18	33.8794
CD27	1.49257	5.92755	5.82441	9.41e-07	2.68e-06	4.62068
FLI1	1.49252	4.97531	21.6304	3.52e-23	4.08e-21	42.7652
BCL11B	1.49141	4.48391	10.492	7.32e-13	6.01e-12	18.775
HLA-J	1.49097	10.3521	15.4016	4.52e-18	1.22e-16	30.9099
BCL6	1.49038	7.70003	8.71207	1.19e-10	6.44e-10	13.6294
STK10	1.489	6.26194	27.8543	3.62e-27	1.41e-24	51.9359
STK39	1.48715	7.82756	4.97013	1.41e-05	3.38e-05	1.93532
PCDHGC3	1.48708	3.9662	32.2638	1.57e-29	1.19e-26	57.315
ZBED8	1.48481	6.239	9.60763	8.74e-12	5.79e-11	16.2679
SLC35G2	1.48469	5.43198	14.6267	2.49e-17	5.52e-16	29.1829
CASP12	1.48144	3.89595	16.6006	3.63e-19	1.32e-17	33.4592
PRR16	1.48117	3.9732	10.5067	7.03e-13	5.8e-12	18.8157
LINC00342	1.47967	6.47543	18.7653	5.32e-21	3.3e-19	37.7175
MN1	1.47929	4.97316	6.88476	3.25e-08	1.17e-07	7.98461
BGN	1.47904	8.01685	5.62995	1.75e-06	4.78e-06	4.00481
LINC01315	1.47742	6.31451	11.9725	1.45e-14	1.68e-13	22.746
PLEKHO1	1.47713	6.74573	12.0726	1.12e-14	1.34e-13	23.0043
PPP1R18	1.47683	7.42509	11.8906	1.78e-14	2.03e-13	22.5336
FAS	1.47566	7.27062	7.89899	1.39e-09	6.24e-09	11.1549
DARS	1.47426	9.43075	15.5766	3.1e-18	8.71e-17	31.2911
CETP	1.47415	5.3685	6.98548	2.37e-08	8.7e-08	8.30256
TAF1A	1.47372	4.33824	12.1926	8.26e-15	1.02e-13	23.3122
TMCC1	1.47345	6.8102	19.4321	1.57e-21	1.14e-19	38.9481
SLC16A6	1.47173	5.01524	11.0381	1.67e-13	1.56e-12	20.2725
ADAP2	1.47158	7.4147	11.4082	6.24e-14	6.39e-13	21.2657
TCF19	1.47133	5.36668	8.32454	3.81e-10	1.88e-09	12.4587
MET	1.47106	7.25391	13.1365	8.02e-16	1.24e-14	25.6726
SERPING1	1.4705	9.70704	7.13182	1.5e-08	5.67e-08	8.76349
FBN1	1.47039	6.08658	7.13692	1.47e-08	5.59e-08	8.77955
THEMIS	1.46978	3.45153	7.27739	9.5e-09	3.7e-08	9.22073
LOC100507336	1.46931	4.23641	22.2629	1.26e-23	1.76e-21	43.8005
ZNF792	1.46651	4.356	18.6767	6.28e-21	3.77e-19	37.5512
HPGDS	1.46596	5.32456	6.63013	7.27e-08	2.46e-07	7.17874
BIRC7	1.46444	6.01626	6.39375	1.54e-07	4.95e-07	6.42871
RAB7B	1.46337	4.4198	12.2798	6.63e-15	8.33e-14	23.535
TRAC	1.46241	6.80152	7.3466	7.65e-09	3.04e-08	9.4376
LINC00324	1.46092	5.82198	17.9483	2.5e-20	1.29e-18	36.1593
BST2	1.46049	8.6278	10.1558	1.86e-12	1.41e-11	17.8336
UNC5B	1.45904	6.98204	10.9412	2.16e-13	1.98e-12	20.0097
PLEKHG4	1.45904	5.9682	10.027	2.66e-12	1.97e-11	17.4693
TPX2	1.4568	4.59106	11.3185	7.9e-14	7.92e-13	21.0267
SIPA1L2	1.45384	6.3699	14.5239	3.14e-17	6.76e-16	28.9489
KIAA1551	1.4536	6.8367	13.621	2.52e-16	4.44e-15	26.8423
EDNRB	1.45346	8.05016	5.2175	6.46e-06	1.62e-05	2.70628
ASAP1	1.45328	7.25604	23.5372	1.69e-24	3.15e-22	45.8085
HS3ST2	1.45266	4.94646	6.04467	4.67e-07	1.39e-06	5.31979
KLRB1	1.45244	6.13554	7.9631	1.14e-09	5.21e-09	11.3525
C1R	1.45036	8.79228	4.30641	0.000110068	0.000229878	-0.0858644
CES4A	1.44829	6.97669	6.16825	3.15e-07	9.68e-07	5.71239
AGAP2-AS1	1.44764	4.95135	13.761	1.82e-16	3.32e-15	27.1749
IFNGR2	1.44679	9.15	19.3606	1.79e-21	1.26e-19	38.818
PRSS16	1.44418	4.90774	6.03383	4.83e-07	1.44e-06	5.28536
CLU	1.44343	8.21472	8.82977	8.41e-11	4.66e-10	13.9816
CD37	1.44193	4.76806	15.4272	4.28e-18	1.16e-16	30.9659
ID3	1.44172	8.95194	5.58838	1.99e-06	5.41e-06	3.87339
ZAK	1.44162	6.33609	16.5671	3.88e-19	1.41e-17	33.3899
CDKN3	1.44052	4.51994	12.0938	1.06e-14	1.27e-13	23.0587
SMAP2	1.43937	7.68755	11.3937	6.48e-14	6.62e-13	21.2271
JAG2	1.43923	7.04844	8.75409	1.05e-10	5.73e-10	13.7554
DNMT1	1.43889	7.58984	16.8	2.42e-19	9.34e-18	33.8693
PPP1R3B	1.43705	5.98518	13.3853	4.41e-16	7.37e-15	26.2766
GNG11	1.43523	7.33881	9.61117	8.65e-12	5.73e-11	16.2781
RBP7	1.435	8.1157	4.68554	3.43e-05	7.73e-05	1.05875
HLA-A	1.43191	12.7511	19.6514	1.06e-21	8.02e-20	39.3452
GRIK3	1.4316	3.61833	13.5593	2.92e-16	5.08e-15	26.6948
SLFN12	1.43117	5.32221	11.3969	6.43e-14	6.57e-13	21.2357
NOTCH2NL	1.43085	9.45646	13.6271	2.49e-16	4.39e-15	26.8567
MCTP1	1.42947	4.62222	10.9978	1.85e-13	1.72e-12	20.1635
SCD	1.42755	6.50939	11.478	5.2e-14	5.38e-13	21.451
GPR176	1.4273	5.38206	14.1407	7.52e-17	1.51e-15	28.0662
PYHIN1	1.42645	3.77839	13.0096	1.09e-15	1.63e-14	25.3617
MAP1B	1.42643	7.36695	8.75602	1.05e-10	5.71e-10	13.7611
RSAD2	1.42632	5.4484	8.96369	5.66e-11	3.23e-10	14.3805
PSORS1C3	1.42617	4.70685	3.59413	0.000909756	0.00164463	-2.13404
RUNX3	1.42546	5.29707	12.2706	6.78e-15	8.51e-14	23.5114
KIF20A	1.42329	3.95794	12.0409	1.21e-14	1.44e-13	22.9226
SAP30	1.42321	5.60632	21.5502	4.02e-23	4.55e-21	42.632
HCG4	1.4225	4.95866	5.98067	5.72e-07	1.69e-06	5.11656
IL6	1.42239	5.49222	5.19764	6.88e-06	1.72e-05	2.64411
RNF149	1.42204	9.99101	15.705	2.36e-18	6.84e-17	31.5687
FANCL	1.42166	7.63764	11.8482	1.99e-14	2.23e-13	22.4233
COL3A1	1.421	7.90004	4.57623	4.81e-05	0.000106019	0.725732
SEC24D	1.42085	4.52208	11.4747	5.24e-14	5.42e-13	21.4421
LOC100505812	1.42083	4.95567	16.1113	9.98e-19	3.2e-17	32.4363
DEF6	1.42002	5.36972	13.6012	2.64e-16	4.64e-15	26.7949
ZFAS1	1.41973	8.73014	13.6928	2.13e-16	3.82e-15	27.0131
TYMS	1.41683	6.40581	14.6375	2.44e-17	5.4e-16	29.2073
CD74	1.41634	8.42125	11.5621	4.17e-14	4.42e-13	21.6734
ENO1	1.41507	8.68167	10.9574	2.07e-13	1.9e-12	20.0538
RCSD1	1.41415	6.3038	11.1145	1.36e-13	1.3e-12	20.479
CHSY1	1.41239	9.13969	9.3704	1.73e-11	1.09e-10	15.5785
RGS10	1.41215	5.76725	13.4331	3.94e-16	6.65e-15	26.392
ITGB2-AS1	1.40997	5.51596	9.24407	2.49e-11	1.53e-10	15.2085
HOXA4	1.40767	7.21601	11.9978	1.35e-14	1.59e-13	22.8113
TMEM154	1.40547	4.16432	11.349	7.29e-14	7.38e-13	21.108
CCNA2	1.40424	4.24605	12.7951	1.84e-15	2.62e-14	24.8316
SPRY1	1.40148	7.52691	6.14941	3.34e-07	1.02e-06	5.65252
MMRN2	1.40054	6.24563	7.27108	9.69e-09	3.77e-08	9.20092
ZNF267	1.3987	6.61299	12.023	1.27e-14	1.5e-13	22.8764
TRAT1	1.39737	3.46912	6.72948	5.31e-08	1.84e-07	7.49346
CLEC1A	1.3959	5.64995	7.82285	1.75e-09	7.75e-09	10.9198
ACKR1	1.3954	6.21619	6.37991	1.61e-07	5.16e-07	6.38478
PARP8	1.39407	6.41644	14.0879	8.5e-17	1.68e-15	27.9433
SEMA4B	1.39351	7.83047	8.63182	1.51e-10	7.99e-10	13.3884
LRIG3	1.39299	7.03728	10.4062	9.27e-13	7.46e-12	18.5362
TNFRSF11A	1.39172	4.00176	9.59007	9.19e-12	6.07e-11	16.2171
ALPK2	1.39171	9.16551	6.91521	2.96e-08	1.07e-07	8.08079
CMC4	1.39105	8.55843	10.7236	3.89e-13	3.39e-12	19.4147
TNFRSF1B	1.39094	7.02417	12.017	1.29e-14	1.52e-13	22.861
KIAA1715	1.39063	6.81424	12.6622	2.55e-15	3.53e-14	24.5003
PCDHB12	1.39014	5.58687	18.2991	1.28e-20	7.27e-19	36.8353
AHR	1.38911	8.65529	10.1855	1.71e-12	1.3e-11	17.9173
IFNGR1	1.38883	7.9597	16.3919	5.57e-19	1.93e-17	33.0258
PCSK5	1.38852	5.51061	10.6106	5.29e-13	4.49e-12	19.1034
GNRH1	1.38711	4.36184	10.4282	8.72e-13	7.07e-12	18.5974
EFNA1	1.38681	9.07484	9.43044	1.45e-11	9.28e-11	15.7536
EFNA3	1.38667	6.23491	15.7975	1.93e-18	5.75e-17	31.7678
LXN	1.38568	8.21297	11.1052	1.39e-13	1.32e-12	20.4539
COL5A1	1.38479	6.15299	5.31231	4.78e-06	1.23e-05	3.00356
PCDHB2	1.38434	4.15307	7.65387	2.95e-09	1.25e-08	10.396
PGK1	1.38354	9.03644	12.1434	9.35e-15	1.14e-13	23.1862
PELI1	1.38239	7.43038	11.2588	9.26e-14	9.17e-13	20.8668
SLC1A4	1.38171	5.43537	16.6131	3.53e-19	1.29e-17	33.485
LOC100507311	1.38106	7.29085	5.80382	1e-06	2.85e-06	4.5554
HMOX1	1.38105	9.23315	6.06239	4.41e-07	1.32e-06	5.37608
PLXNC1	1.38057	5.43834	13.1041	8.67e-16	1.32e-14	25.5935
PSORS1C1	1.38005	3.75572	12.6182	2.85e-15	3.89e-14	24.39
HLA-E	1.37728	10.8148	15.323	5.36e-18	1.42e-16	30.7377
DPEP2	1.37715	5.37829	13.3724	4.55e-16	7.58e-15	26.2455
GPR18	1.37688	3.54656	8.76916	1.01e-10	5.51e-10	13.8005
GIMAP7	1.37575	7.58104	9.00173	5.07e-11	2.92e-10	14.4934
APOL1	1.37454	7.17798	5.87111	8.11e-07	2.33e-06	4.76881
SGOL2	1.37446	4.65854	15.7342	2.21e-18	6.49e-17	31.6316
LOC101929465	1.37341	4.97405	4.84722	2.07e-05	4.83e-05	1.55521
LY6H	1.37206	3.83171	5.54681	2.27e-06	6.12e-06	3.74208
ALDOA	1.37157	11.0448	14.1053	8.16e-17	1.62e-15	27.9837
IER5	1.37114	7.9656	11.4821	5.14e-14	5.33e-13	21.4619
JUN	1.36927	8.55218	7.31613	8.42e-09	3.31e-08	9.34217
RAPGEF4	1.36907	5.74615	4.83095	2.18e-05	5.07e-05	1.50504
SAMD9	1.36893	5.57303	10.4854	7.46e-13	6.11e-12	18.7565
EVL	1.36873	7.45834	15.6218	2.81e-18	8.03e-17	31.3891
MCM2	1.36772	6.56383	12.3022	6.26e-15	7.94e-14	23.592
SHC1	1.36746	8.2473	12.1915	8.28e-15	1.02e-13	23.3095
EFEMP2	1.36411	8.48785	13.429	3.98e-16	6.71e-15	26.3821
TMEM133	1.36205	7.39086	7.61953	3.28e-09	1.38e-08	10.2893
GTSF1	1.36107	4.19026	11.2025	1.07e-13	1.05e-12	20.716
PROS1	1.36055	9.92625	7.11151	1.6e-08	6.02e-08	8.69961
CXCL1	1.35992	6.17304	4.21088	0.000147117	0.000301234	-0.369181
LPGAT1	1.35953	7.32535	12.4599	4.22e-15	5.56e-14	23.9918
GUCY1B3	1.35865	7.9392	10.7238	3.89e-13	3.39e-12	19.4155
HLA-DRB4	1.3581	5.9972	3.48704	0.00123489	0.00218496	-2.42706
BMP2	1.35747	6.57583	7.68413	2.69e-09	1.15e-08	10.49
CXCL2	1.35709	5.07514	8.1349	6.76e-10	3.19e-09	11.8799
MMP9	1.3561	5.70625	5.48713	2.75e-06	7.29e-06	3.55372
LYN	1.35567	7.38744	11.0174	1.76e-13	1.64e-12	20.2166
NCAPG2	1.35542	4.99896	17.895	2.77e-20	1.42e-18	36.0557
PTGFRN	1.35494	6.56954	5.38406	3.81e-06	9.9e-06	3.22906
TMEM54	1.35451	6.67274	9.14315	3.35e-11	2e-10	14.9115
LOC283070	1.35376	6.08581	13.4335	3.93e-16	6.65e-15	26.3929
ZBED6CL	1.35219	6.43678	6.45452	1.27e-07	4.14e-07	6.62166
COX4I2	1.35102	5.9669	8.46982	2.46e-10	1.25e-09	12.8995
ELK3	1.35074	6.72054	16.1275	9.65e-19	3.13e-17	32.4705
BNIP3	1.34667	10.579	12.1389	9.46e-15	1.15e-13	23.1747
GIMAP6	1.34381	7.92205	9.69428	6.83e-12	4.61e-11	16.5179
CD53	1.3437	5.81581	14.4203	3.97e-17	8.39e-16	28.7118
UBE2L6	1.34344	8.4062	12.5589	3.3e-15	4.44e-14	24.2414
MPZL2	1.34015	6.26909	8.42971	2.77e-10	1.4e-09	12.7781
NOG	1.33889	3.95426	3.90148	0.000371429	0.000714396	-1.26969
CDKN2B	1.33889	3.82472	19.6176	1.12e-21	8.4e-20	39.2843
KIF14	1.3382	3.31883	16.8458	2.2e-19	8.65e-18	33.963
CDH6	1.33476	6.95905	6.5341	9.85e-08	3.27e-07	6.87421
IGDCC4	1.3347	3.93909	3.1408	0.00322844	0.00534991	-3.34129
SLC16A1	1.33439	6.20172	7.92252	1.29e-09	5.84e-09	11.2275
NR3C1	1.33415	8.74025	16.1147	9.91e-19	3.19e-17	32.4435
NCK1	1.33375	6.53407	15.6978	2.39e-18	6.93e-17	31.5532
FSTL3	1.33238	7.11925	6.08126	4.15e-07	1.25e-06	5.43603
TLR4	1.33203	5.41606	15.6279	2.78e-18	7.95e-17	31.4023
LOC100506691	1.33129	5.13652	6.24762	2.45e-07	7.64e-07	5.96455
DEGS1	1.32945	9.5024	10.9356	2.19e-13	2.01e-12	19.9944
MAFB	1.32877	8.93425	9.07708	4.06e-11	2.39e-10	14.7165
STK17B	1.32875	4.79111	11.6115	3.67e-14	3.92e-13	21.8037
IFI6	1.328	7.2769	7.26459	9.89e-09	3.84e-08	9.18057
COL5A3	1.32766	5.98584	7.75024	2.19e-09	9.53e-09	10.695
MIR4435-1HG /// RP11-181E10.3	1.32706	3.77457	15.3741	4.8e-18	1.29e-16	30.8498
LRRK1	1.32637	5.05135	16.1014	1.02e-18	3.26e-17	32.4153
IFNG	1.32562	3.84906	6.68525	6.11e-08	2.1e-07	7.3534
IFI27	1.32288	8.5998	5.86242	8.33e-07	2.4e-06	4.74126
ANO1	1.3213	5.44686	5.96365	6.04e-07	1.77e-06	5.06252
SLC41A2	1.32092	5.93061	10.0046	2.84e-12	2.08e-11	17.4057
BMP2K	1.31995	5.28214	19.3555	1.8e-21	1.26e-19	38.8086
HLA-C	1.31663	11.8942	17.4561	6.51e-20	2.98e-18	35.1925
NCF1	1.31602	5.84632	9.53471	1.08e-11	7.04e-11	16.0567
NDRG1	1.31589	12.0543	14.2201	6.27e-17	1.27e-15	28.2505
MYADM	1.31523	7.84683	6.82814	3.89e-08	1.38e-07	7.80563
CYBB	1.31461	4.56364	13.2172	6.6e-16	1.04e-14	25.8694
SEL1L3	1.31406	6.22352	13.5806	2.78e-16	4.85e-15	26.7458
ABLIM3	1.31266	7.9666	7.92525	1.28e-09	5.8e-09	11.2359
MYO1F	1.31202	6.85826	9.38606	1.65e-11	1.04e-10	15.6242
ENPP2	1.31035	10.5221	5.10856	9.11e-06	2.24e-05	2.36586
TRPV2	1.31022	4.97717	22.6916	6.33e-24	9.82e-22	44.4874
BARD1	1.31014	4.92854	16.6545	3.25e-19	1.2e-17	33.5704
DDX60	1.30722	7.53885	13.4628	3.67e-16	6.26e-15	26.4633
CTSW	1.30717	5.73487	9.18451	2.97e-11	1.79e-10	15.0334
FCGR3B	1.30713	6.50428	6.85641	3.56e-08	1.27e-07	7.89501
ARHGAP22	1.30609	3.85633	16.7696	2.57e-19	9.75e-18	33.807
LOC100127972	1.30603	4.3854	19.6801	1e-21	7.65e-20	39.3968
LOC100505498	1.30544	4.06116	5.83726	9.03e-07	2.58e-06	4.66145
LOC284219	1.305	5.63488	8.19159	5.69e-10	2.72e-09	12.0533
CORO1C	1.30435	8.36417	13.9156	1.27e-16	2.41e-15	27.5397
JUNB	1.30398	8.44053	5.54332	2.3e-06	6.18e-06	3.73106
WIPF1	1.30392	6.13198	13.3328	5e-16	8.23e-15	26.1499
DOCK2	1.30378	4.61664	14.1309	7.7e-17	1.54e-15	28.0434
CXCL5	1.30322	3.15123	3.82799	0.000461244	0.000873608	-1.47931
P2RY13	1.30306	5.16717	7.12151	1.55e-08	5.85e-08	8.73108
KLF6	1.30298	9.1776	6.35536	1.74e-07	5.54e-07	6.30678
AOAH	1.30269	6.40402	12.0655	1.14e-14	1.36e-13	22.9858
ARHGDIB	1.30257	8.50634	15.949	1.4e-18	4.31e-17	32.0917
NRTN	1.30184	4.4539	7.34502	7.69e-09	3.05e-08	9.43265
CLEC7A	1.3017	4.50945	14.4052	4.11e-17	8.66e-16	28.6773
CCNB1	1.30152	4.85627	9.00756	4.98e-11	2.88e-10	14.5107
PKM	1.30053	8.28707	9.7928	5.16e-12	3.57e-11	16.8011
LEPROTL1	1.29923	8.5085	12.7571	2.02e-15	2.85e-14	24.7372
ZNF532	1.2955	7.29234	8.17428	6e-10	2.86e-09	12.0004
DTX3L	1.29533	8.62845	10.5835	5.7e-13	4.79e-12	19.0286
GAL3ST4	1.29433	6.74021	9.22866	2.61e-11	1.59e-10	15.1633
STEAP4	1.2943	4.99755	6.58063	8.5e-08	2.84e-07	7.02178
CXorf21	1.29404	5.53704	14.6038	2.63e-17	5.76e-16	29.1309
SLC1A3	1.29387	5.06416	8.72186	1.16e-10	6.27e-10	13.6588
PLEKHA2	1.29384	6.99252	7.68202	2.71e-09	1.16e-08	10.4835
GIMAP4	1.29309	7.81362	12.7115	2.26e-15	3.16e-14	24.6233
TMEM92	1.29222	5.02578	8.87283	7.4e-11	4.15e-10	14.1101
CD99	1.29103	9.51627	16.5035	4.43e-19	1.58e-17	33.258
ITGA7	1.28849	6.60452	7.95655	1.16e-09	5.31e-09	11.3323
SLC38A1	1.28691	7.13114	11.0752	1.51e-13	1.43e-12	20.373
NUF2	1.28407	3.23215	12.5826	3.11e-15	4.22e-14	24.301
ATP8B3	1.2839	3.95601	9.68449	7.02e-12	4.73e-11	16.4897
NMI	1.2836	8.28347	13.8929	1.33e-16	2.52e-15	27.4863
QPCT	1.28316	6.29432	3.57924	0.000949461	0.00171127	-2.17506
LAIR1	1.28266	6.55883	10.6514	4.73e-13	4.05e-12	19.216
ICAM2	1.28139	7.83039	9.36385	1.76e-11	1.11e-10	15.5593
NEFL	1.28129	5.95498	2.54885	0.0149012	0.0222123	-4.76476
PTPRE	1.28111	5.23552	16.2693	7.18e-19	2.39e-17	32.769
CCNE2	1.28034	3.44191	18.659	6.49e-21	3.89e-19	37.518
HEY2	1.27934	6.10799	8.35034	3.52e-10	1.75e-09	12.5372
ANO4	1.27928	4.09156	8.18218	5.86e-10	2.8e-09	12.0246
PILRA	1.27913	5.81262	12.3484	5.58e-15	7.14e-14	23.7096
RPL3	1.27775	12.4732	24.7783	2.62e-25	5.97e-23	47.6712
SEC61G	1.27629	9.59767	17.2527	9.74e-20	4.3e-18	34.7866
MCTP2	1.27615	4.84617	15.4226	4.32e-18	1.17e-16	30.9558
NOV	1.27566	6.02069	4.20616	0.000149233	0.00030517	-0.383113
PLOD3	1.27531	8.86091	9.21834	2.69e-11	1.64e-10	15.1329
BDNF	1.27493	4.39503	5.52032	2.47e-06	6.62e-06	3.65843
CYTIP	1.27472	6.59721	5.42955	3.3e-06	8.65e-06	3.37225
WWC3	1.27424	7.87109	17.9707	2.39e-20	1.24e-18	36.2029
PBX4	1.27383	5.39806	9.39884	1.59e-11	1.01e-10	15.6615
ABCC1	1.27375	6.55842	11.3985	6.4e-14	6.54e-13	21.24
IL1B	1.27345	6.22337	5.16148	7.71e-06	1.91e-05	2.53107
TSPAN4	1.27317	8.11444	11.9159	1.67e-14	1.91e-13	22.5992
SMC4	1.27278	5.91007	22.5814	7.54e-24	1.15e-21	44.3119
HAUS6	1.27135	5.25602	11.6802	3.07e-14	3.34e-13	21.9841
SELL	1.27004	6.06752	7.62546	3.22e-09	1.36e-08	10.3077
PVRIG	1.26943	5.32663	7.80445	1.86e-09	8.16e-09	10.8629
SERPINB9P1	1.26919	4.62047	6.58511	8.38e-08	2.81e-07	7.03601
CREB5	1.26907	6.20377	5.8642	8.29e-07	2.38e-06	4.74689
FAM65B	1.26866	5.44437	11.1257	1.32e-13	1.26e-12	20.5092
SGK223	1.26857	7.83962	10.8734	2.59e-13	2.33e-12	19.825
EIF4EBP1	1.26815	7.55314	9.51756	1.13e-11	7.37e-11	16.0069
SERPINH1	1.26778	7.99906	10.2332	1.5e-12	1.16e-11	18.0516
KIF11	1.26771	4.03056	10.0278	2.66e-12	1.96e-11	17.4715
MAP3K8	1.26718	5.85488	8.48352	2.36e-10	1.21e-09	12.941
TTLL7	1.26667	4.63762	8.09333	7.67e-10	3.59e-09	11.7526
SLC17A2	1.26626	4.40623	5.43313	3.26e-06	8.56e-06	3.38353
SULT1C4	1.26476	5.36347	3.99269	0.000283337	0.000556032	-1.00712
DENND1C	1.26411	6.17127	8.49906	2.25e-10	1.16e-09	12.988
CYSLTR1	1.26386	3.88244	14.3903	4.25e-17	8.93e-16	28.6431
IFFO1	1.26291	7.57281	17.0023	1.61e-19	6.49e-18	34.2815
TBC1D10C	1.26289	5.93477	11.0825	1.48e-13	1.4e-12	20.3928
IRF1	1.2621	7.12864	8.49725	2.26e-10	1.16e-09	12.9825
CLIC1	1.26197	10.4656	17.8484	3.03e-20	1.52e-18	35.9649
LOC643733	1.26119	3.97396	16.0638	1.1e-18	3.5e-17	32.3358
C3orf67	1.26064	3.36155	8.85871	7.72e-11	4.31e-10	14.068
CDC42EP5	1.26023	6.08688	4.88965	1.81e-05	4.27e-05	1.68616
CYTH4	1.26021	5.42812	17.9622	2.43e-20	1.26e-18	36.1863
HTATSF1P2	1.25914	3.18566	8.05439	8.64e-10	4.01e-09	11.6331
INHBA	1.25863	5.12239	5.80043	1.02e-06	2.88e-06	4.54466
KDELC1	1.25833	6.2725	11.1526	1.23e-13	1.19e-12	20.5817
EFNB2	1.25749	8.18752	5.047	1.11e-05	2.68e-05	2.17408
LAMC1	1.25733	8.89843	13.2803	5.67e-16	9.15e-15	26.0227
S100A11	1.25703	9.40606	7.50666	4.65e-09	1.91e-08	9.93777
CDCA7	1.25683	3.85966	11.5422	4.39e-14	4.62e-13	21.6209
CCDC110	1.2567	4.26702	7.00055	2.26e-08	8.31e-08	8.35006
GRIN2A	1.25661	4.07873	6.33952	1.83e-07	5.81e-07	6.25648
RB1	1.25573	6.82178	18.9499	3.78e-21	2.44e-19	38.0618
LINC00260	1.25538	4.5033	13.706	2.07e-16	3.73e-15	27.0444
BICD1	1.25511	5.97041	11.4822	5.14e-14	5.33e-13	21.4622
SECTM1	1.2547	6.58788	9.04087	4.52e-11	2.63e-10	14.6093
TTC13	1.25221	7.20248	9.24494	2.49e-11	1.52e-10	15.211
KIF18A	1.25172	3.37205	11.3405	7.46e-14	7.52e-13	21.0853
CD44	1.25148	5.15809	8.89266	6.98e-11	3.93e-10	14.1692
TCERG1	1.25096	5.55538	15.0773	9.17e-18	2.27e-16	30.1949
KNTC1	1.25002	5.44097	10.5587	6.1e-13	5.11e-12	18.9601
FCGR2A	1.24988	5.03347	13.2775	5.71e-16	9.19e-15	26.0159
NID2	1.24916	7.71346	4.57352	4.85e-05	0.000106866	0.717493
MELK	1.24879	5.58648	10.3624	1.05e-12	8.33e-12	18.4139
IFNAR2	1.24786	7.14157	12.2991	6.31e-15	7.99e-14	23.584
GJA4	1.24741	7.1398	5.90155	7.36e-07	2.13e-06	4.86539
EBI3	1.24709	4.95995	10.9671	2.01e-13	1.86e-12	20.0802
DOK3	1.24572	5.49165	11.81	2.19e-14	2.44e-13	22.3237
TRPC1	1.24429	5.60195	11.856	1.95e-14	2.2e-13	22.4435
LOC101928370	1.24422	3.7686	10.1451	1.91e-12	1.45e-11	17.8034
F13A1	1.24232	8.88659	4.34625	9.75e-05	0.000205143	0.0329584
C10orf54	1.24228	6.23935	14.6141	2.57e-17	5.65e-16	29.1542
PTHLH	1.24225	3.23915	3.4739	0.00128174	0.00226336	-2.4627
PARP12	1.23905	7.33935	11.169	1.17e-13	1.14e-12	20.6258
ARHGEF10	1.23882	6.45568	12.0539	1.17e-14	1.4e-13	22.956
SULF1	1.23783	7.25303	5.17639	7.35e-06	1.83e-05	2.57767
APOBR	1.23777	5.02387	16.482	4.63e-19	1.63e-17	33.2134
PATL2	1.23721	4.75819	11.3249	7.77e-14	7.8e-13	21.0437
LOC101928429	1.23684	3.63731	10.5241	6.7e-13	5.56e-12	18.8642
C15orf48	1.23672	5.83432	3.31305	0.00201236	0.00344855	-2.89312
ETS1	1.23548	6.42531	13.9842	1.08e-16	2.11e-15	27.7008
KIF2A	1.23544	5.85165	7.34464	7.7e-09	3.05e-08	9.43145
TNFRSF10B	1.23537	6.83201	13.2591	5.97e-16	9.56e-15	25.9711
SLC2A6	1.23525	5.46742	14.4857	3.43e-17	7.33e-16	28.8616
CIB4	1.23508	3.7694	8.7779	9.81e-11	5.38e-10	13.8266
ABCA12	1.23444	3.27721	5.07591	1.01e-05	2.46e-05	2.2641
DENND5A	1.23306	8.50518	20.0311	5.39e-22	4.47e-20	40.0237
PARVG	1.23298	5.60026	12.9875	1.15e-15	1.71e-14	25.3072
ATG16L2	1.23238	6.09252	17.7907	3.39e-20	1.67e-18	35.8521
PLEK	1.23115	6.49254	7.90681	1.36e-09	6.1e-09	11.179
PDK4	1.23098	9.19108	2.93751	0.00555546	0.00888266	-3.85168
PRDM1	1.22976	6.39795	11.8642	1.91e-14	2.16e-13	22.4649
FJX1	1.229	6.41235	8.84752	7.98e-11	4.44e-10	14.0346
KBTBD8	1.22863	3.7981	13.3171	5.19e-16	8.46e-15	26.1119
CD48	1.228	5.38335	9.36981	1.73e-11	1.09e-10	15.5767
PALD1	1.22727	6.18359	8.79981	9.19e-11	5.07e-10	13.8922
PRF1	1.2268	6.47345	9.93264	3.47e-12	2.5e-11	17.2009
LOC102725408	1.22638	4.37578	4.91466	1.68e-05	3.97e-05	1.76349
PLA1A	1.22621	7.55405	4.37378	8.96e-05	0.000189682	0.115269
HCG27	1.22614	5.37204	10.1936	1.67e-12	1.28e-11	17.9401
LIMS1	1.22586	4.57818	11.3139	8e-14	8.01e-13	21.0144
CRLF3	1.2254	7.79367	13.9783	1.09e-16	2.13e-15	27.687
LINC00597	1.22518	4.65855	6.16534	3.18e-07	9.76e-07	5.70312
DGCR9	1.22506	5.07995	10.6355	4.94e-13	4.22e-12	19.1723
ERAP2	1.22324	4.67402	4.67429	3.55e-05	7.98e-05	1.02437
TIGIT	1.22263	4.13506	7.80776	1.84e-09	8.08e-09	10.8731
AP1S2	1.22245	7.45288	19.3597	1.79e-21	1.26e-19	38.8163
PRAME	1.22205	4.90875	4.05567	0.000234758	0.000466917	-0.824363
ABI3BP	1.22097	5.71868	6.03724	4.78e-07	1.43e-06	5.2962
C10orf99	1.2208	4.39988	2.81408	0.00765773	0.0119839	-4.151
PLTP	1.22068	7.8248	2.96593	0.00515482	0.00828347	-3.7816
KCNS3	1.22031	6.55741	5.25798	5.68e-06	1.44e-05	2.83309
PFKFB4	1.21984	5.75153	19.1616	2.56e-21	1.71e-19	38.4534
TGFA	1.21959	6.36967	19.0736	3.01e-21	1.97e-19	38.291
LRRK2	1.21873	8.80193	7.38194	6.86e-09	2.74e-08	9.5482
ECSCR	1.21864	7.07939	6.72219	5.43e-08	1.88e-07	7.47039
CXorf36	1.21858	5.14286	10.9147	2.32e-13	2.11e-12	19.9376
LOC153684	1.21672	6.52418	8.00471	1e-09	4.62e-09	11.4805
DOCK8	1.21636	6.33391	13.4428	3.85e-16	6.52e-15	26.4153
DOCK11	1.21595	5.94566	9.77581	5.41e-12	3.73e-11	16.7523
HIST1H4H	1.21541	4.8194	7.26552	9.86e-09	3.83e-08	9.1835
IL1RAP	1.21524	4.6217	11.7744	2.4e-14	2.66e-13	22.2308
SPRY4	1.21505	7.64435	6.44098	1.32e-07	4.31e-07	6.57866
C1orf216	1.21436	6.03125	9.1444	3.34e-11	1.99e-10	14.9152
SEC14L4	1.21433	4.49022	15.1251	8.26e-18	2.06e-16	30.3011
CD72	1.21058	5.14692	6.41823	1.42e-07	4.61e-07	6.50643
PIK3R3	1.2102	6.60373	7.74974	2.2e-09	9.54e-09	10.6935
ABCA1	1.20796	6.25368	14.7254	2e-17	4.55e-16	29.4065
RAP2B	1.20727	5.12808	17.7638	3.57e-20	1.74e-18	35.7995
BHLHE40	1.20632	8.42104	6.29653	2.09e-07	6.61e-07	6.11993
SERTAD2	1.20619	8.42777	16.4065	5.4e-19	1.88e-17	33.0563
RPL22L1	1.20585	7.99317	11.3781	6.75e-14	6.87e-13	21.1855
S100A4	1.20549	9.25899	5.09053	9.64e-06	2.36e-05	2.30964
PPP1R13L	1.20536	6.93579	8.55603	1.9e-10	9.87e-10	13.16
ZNF160	1.2047	6.54492	17.8681	2.92e-20	1.48e-18	36.0032
CASP4	1.20463	6.52635	11.6545	3.28e-14	3.54e-13	21.9166
CECR1	1.20453	8.25991	5.14469	8.13e-06	2.01e-05	2.4786
HIST1H2BE	1.20392	6.68367	8.91918	6.46e-11	3.65e-10	14.2482
RNF175	1.20326	4.18222	6.94409	2.7e-08	9.82e-08	8.17194
DGKD	1.20306	7.44539	10.6913	4.25e-13	3.67e-12	19.3259
CDC20	1.20195	4.66661	7.80256	1.87e-09	8.2e-09	10.857
ABCB4	1.20147	4.21737	7.53534	4.26e-09	1.76e-08	10.0272
STAB1	1.20142	6.02051	11.6197	3.59e-14	3.84e-13	21.8252
ATAD2	1.20133	4.21249	13.981	1.09e-16	2.12e-15	27.6934
IL4R	1.20079	7.26521	11.9905	1.38e-14	1.61e-13	22.7924
DNAH11	1.19968	3.93355	8.39381	3.09e-10	1.55e-09	12.6692
OSCAR	1.19935	3.88648	10.7754	3.38e-13	2.98e-12	19.557
GSAP	1.19883	8.54313	10.7477	3.64e-13	3.2e-12	19.481
DPYSL3	1.19869	4.99066	7.08711	1.72e-08	6.47e-08	8.62282
AAED1	1.19826	7.13485	12.6416	2.69e-15	3.69e-14	24.4487
SERPINB9	1.19719	5.90697	11.2068	1.06e-13	1.04e-12	20.7275
FMO2	1.19689	8.04545	3.90225	0.000370576	0.000713158	-1.26746
CD3G	1.19645	4.32165	7.50538	4.67e-09	1.91e-08	9.9338
LIX1L	1.19639	6.38098	16.7593	2.62e-19	9.94e-18	33.7858
RPS21	1.19612	9.96563	11.7457	2.59e-14	2.86e-13	22.156
LAG3	1.19433	4.43298	5.67617	1.51e-06	4.17e-06	4.15104
PCSK6	1.19306	4.60377	10.3648	1.04e-12	8.28e-12	18.4206
RAB27A	1.19267	6.74165	8.81755	8.72e-11	4.82e-10	13.9452
TAGAP	1.19233	4.32741	9.6037	8.84e-12	5.85e-11	16.2565
CNOT8	1.19185	7.37185	17.1538	1.19e-19	5.04e-18	34.5879
FBLN7	1.1912	4.90298	5.4125	3.48e-06	9.1e-06	3.31857
ADRB2	1.18949	5.32093	9.03413	4.61e-11	2.68e-10	14.5894
DSN1	1.18811	6.07164	18.8338	4.69e-21	2.96e-19	37.8456
HNRNPU-AS1	1.18807	8.07817	8.56221	1.86e-10	9.7e-10	13.1787
CARD16	1.18788	4.80691	12.1544	9.1e-15	1.11e-13	23.2145
PPP1R15A	1.18775	6.79337	6.37938	1.61e-07	5.17e-07	6.38309
RFC2	1.1874	6.73804	16.7278	2.8e-19	1.05e-17	33.7212
SAMD3	1.18737	3.73227	15.1967	7.06e-18	1.8e-16	30.4595
KDR	1.18666	8.64969	4.26958	0.00012312	0.000255083	-0.195359
MYEOV	1.18522	5.50668	5.49994	2.64e-06	7.02e-06	3.59412
SHMT2	1.18504	8.2945	7.13965	1.46e-08	5.54e-08	8.78812
ITPRIP	1.18436	6.55529	10.0512	2.49e-12	1.85e-11	17.538
IRF7	1.18367	7.10451	9.33792	1.9e-11	1.19e-10	15.4835
FAM216A	1.18147	6.70843	8.35619	3.46e-10	1.72e-09	12.5549
LINC01111	1.18097	4.90002	4.15209	0.000175711	0.000355553	-0.542354
VKORC1	1.18084	9.56234	12.978	1.18e-15	1.75e-14	25.2839
IL33	1.18021	4.81171	4.09248	0.000210225	0.000420944	-0.716994
C19orf33	1.1801	7.13953	3.99609	0.000280484	0.000550645	-0.99729
NAF1	1.17968	5.65296	12.0341	1.23e-14	1.46e-13	22.9051
CD96	1.1795	3.40829	9.42162	1.49e-11	9.51e-11	15.7279
CRIP2	1.17916	8.27098	6.17028	3.13e-07	9.62e-07	5.71882
PCDHB11	1.17913	5.4704	13.814	1.6e-16	2.98e-15	27.3005
LOC283588	1.17902	3.86873	9.34835	1.84e-11	1.15e-10	15.514
RPS19	1.17886	9.98943	20.644	1.86e-22	1.74e-20	41.096
SRGAP2	1.17846	5.2715	7.95391	1.17e-09	5.35e-09	11.3242
N4BP2L2-IT2	1.17819	3.96451	17.147	1.2e-19	5.1e-18	34.574
PARP9	1.17775	6.65976	13.3044	5.35e-16	8.68e-15	26.081
ELF4	1.17734	6.49837	12.2569	7.02e-15	8.75e-14	23.4767
A1BG	1.17671	4.38586	13.9113	1.28e-16	2.43e-15	27.5297
CBR3	1.1762	6.02076	9.13209	3.46e-11	2.06e-10	14.8789
MIAT	1.17537	4.81237	8.07614	8.08e-10	3.77e-09	11.6998
TNFSF4	1.17427	4.95799	11.4351	5.82e-14	5.98e-13	21.3371
GPCPD1	1.17418	6.66054	12.523	3.6e-15	4.82e-14	24.1511
RBM28	1.17356	7.01564	14.6661	2.28e-17	5.1e-16	29.2722
SPINK5	1.17299	5.13774	5.73679	1.24e-06	3.48e-06	4.343
CCR2	1.17273	4.50451	7.88078	1.47e-09	6.56e-09	11.0987
ZNF826P	1.1721	5.81514	5.1588	7.77e-06	1.93e-05	2.52269
TUBA1B	1.17056	10.2535	13.5619	2.9e-16	5.05e-15	26.7009
DDX60L	1.17021	5.10589	15.5926	3e-18	8.46e-17	31.3259
ZAP70	1.17015	5.03937	10.9169	2.31e-13	2.1e-12	19.9436
CCNYL2	1.17003	3.90251	4.69008	3.38e-05	7.63e-05	1.07264
SLC7A11	1.16992	3.62131	10.1139	2.09e-12	1.57e-11	17.7154
LOC401220	1.16973	3.16043	7.14659	1.43e-08	5.43e-08	8.80996
CAMLG	1.16943	9.29555	12.0327	1.24e-14	1.47e-13	22.9014
ASAP1-IT2	1.16905	5.09425	13.3557	4.73e-16	7.83e-15	26.2053
TAF5	1.16812	5.52977	11.2222	1.02e-13	1e-12	20.7689
PLP2	1.16754	8.02608	6.26598	2.31e-07	7.23e-07	6.02289
IL12RB2	1.16711	3.77109	4.3265	0.000103529	0.000216884	-0.0259842
TMEM2	1.16697	7.30556	7.94639	1.2e-09	5.46e-09	11.301
CD163L1	1.16512	5.43849	6.28209	2.19e-07	6.9e-07	6.07406
C11orf96	1.16484	10.1691	4.10803	0.000200635	0.000402843	-0.671546
SQRDL	1.16402	9.85626	12.2208	7.69e-15	9.52e-14	23.3842
CIART	1.16368	6.46051	7.2452	1.05e-08	4.07e-08	9.11975
SFMBT2	1.16316	5.21385	17.246	9.87e-20	4.34e-18	34.7732
DENND3	1.16291	6.0198	17.7908	3.39e-20	1.67e-18	35.8523
NEURL1B	1.16174	7.62461	4.32911	0.000102709	0.000215366	-0.0182147
CEP55	1.16172	3.18168	9.43111	1.45e-11	9.26e-11	15.7556
RBM24	1.161	4.35748	4.01084	0.000268413	0.000529076	-0.954565
CREG2	1.16075	3.12301	6.63666	7.12e-08	2.41e-07	7.19944
STAT1	1.16072	7.53223	6.40959	1.46e-07	4.73e-07	6.47901
ZHX2	1.15786	6.6593	8.7597	1.04e-10	5.65e-10	13.7722
TMEM140	1.15602	8.76739	9.1422	3.36e-11	2e-10	14.9088
LAT2	1.15558	5.75522	14.3167	5.03e-17	1.04e-15	28.4736
KIF4A	1.15125	4.1648	13.9242	1.24e-16	2.37e-15	27.5601
SLC2A1	1.15097	5.83367	11.5518	4.28e-14	4.52e-13	21.6462
FBL	1.15004	9.50313	11.6749	3.11e-14	3.38e-13	21.9703
DCK	1.14957	7.55686	9.69562	6.8e-12	4.6e-11	16.5218
VLDLR	1.14953	7.6515	6.66814	6.45e-08	2.21e-07	7.29919
ETV7	1.14855	4.5992	10.0174	2.74e-12	2.02e-11	17.4421
FMNL3	1.14752	5.02473	12.5483	3.39e-15	4.54e-14	24.2147
IRF8	1.14726	7.53877	5.42096	3.39e-06	8.87e-06	3.34519
ITGBL1	1.1468	4.42085	4.74907	2.81e-05	6.43e-05	1.2533
CCDC127	1.14639	6.62874	9.64324	7.9e-12	5.27e-11	16.3707
UCP2	1.14636	7.67959	6.12206	3.65e-07	1.11e-06	5.56564
KCTD9	1.1452	7.9847	9.45432	1.36e-11	8.71e-11	15.8231
DLEU2	1.14413	4.78724	13.0736	9.33e-16	1.42e-14	25.5188
LOC100996286	1.14324	4.49505	19.8699	7.17e-22	5.8e-20	39.737
CYTL1	1.14162	4.55985	7.14323	1.44e-08	5.48e-08	8.79938
CDH11	1.14158	5.9479	7.59942	3.49e-09	1.46e-08	10.2267
LILRA1	1.14142	4.07556	17.2199	1.04e-19	4.52e-18	34.7206
ZNF26	1.14055	6.232	13.8173	1.59e-16	2.96e-15	27.3081
TMEM163	1.14013	5.35885	4.15888	0.00017215	0.000348865	-0.522405
MCM5	1.13973	6.54013	14.4182	3.99e-17	8.42e-16	28.7071
HHLA2	1.13893	3.92483	6.13917	3.45e-07	1.05e-06	5.62001
HAUS7	1.13873	7.65244	5.63145	1.74e-06	4.76e-06	4.00956
SEMA3F	1.13834	6.83016	10.2781	1.32e-12	1.03e-11	18.1778
GINS3	1.13773	4.45257	16.7741	2.55e-19	9.68e-18	33.8162
FER1L4	1.13713	4.56678	13.2788	5.69e-16	9.17e-15	26.019
ARHGAP25	1.13689	5.34972	22.2432	1.3e-23	1.8e-21	43.7686
FIGNL1	1.13655	5.39724	10.4755	7.66e-13	6.26e-12	18.7291
HRASLS	1.13646	3.85493	6.28934	2.14e-07	6.75e-07	6.09708
PTPN12	1.13596	6.24097	15.9554	1.39e-18	4.26e-17	32.1054
ATP2B4	1.13573	6.70623	21.9151	2.21e-23	2.71e-21	43.2345
CSGALNACT2	1.13495	6.7118	15.8039	1.91e-18	5.69e-17	31.7815
DOCK4	1.1345	5.85443	10.9482	2.12e-13	1.95e-12	20.0288
EMILIN2	1.13407	4.97014	15.5308	3.42e-18	9.48e-17	31.1917
NAPSB	1.13253	5.48323	6.25927	2.36e-07	7.38e-07	6.00157
LOC100422737	1.13224	7.70489	4.39982	8.27e-05	0.000176061	0.193291
COL11A1	1.13107	3.2077	4.29581	0.000113679	0.000236888	-0.117412
PPAP2A	1.13096	10.2796	5.23685	6.08e-06	1.53e-05	2.76689
USP37	1.13083	5.5561	15.0605	9.51e-18	2.35e-16	30.1577
RACGAP1	1.12974	6.69069	9.30834	2.07e-11	1.29e-10	15.397
PITRM1-AS1	1.1283	3.72813	12.7262	2.18e-15	3.06e-14	24.66
SNAPC1	1.12707	6.92308	10.5291	6.61e-13	5.49e-12	18.878
NR5A2	1.12647	3.49867	12.2266	7.58e-15	9.39e-14	23.3991
TNFRSF1A	1.12586	8.92745	8.79453	9.33e-11	5.14e-10	13.8764
CCND3	1.12566	7.18067	11.2	1.08e-13	1.05e-12	20.7092
TPK1	1.12507	6.20913	9.04098	4.51e-11	2.63e-10	14.6097
APAF1	1.12434	4.76947	23.591	1.56e-24	2.94e-22	45.8911
DDX11	1.12243	6.01201	15.3804	4.73e-18	1.27e-16	30.8634
SERPINA1	1.12206	8.14557	5.5495	2.25e-06	6.07e-06	3.75056
ANXA5	1.12117	10.9274	13.1938	6.98e-16	1.1e-14	25.8125
AFAP1	1.12081	3.51508	13.9457	1.18e-16	2.27e-15	27.6104
RNF145	1.11744	6.50759	16.7877	2.48e-19	9.54e-18	33.844
TMEM136	1.11655	5.73773	14.3793	4.36e-17	9.13e-16	28.6178
TXK	1.11649	4.15481	8.52864	2.06e-10	1.06e-09	13.0774
RHOJ	1.11531	5.34735	7.01193	2.18e-08	8.05e-08	8.38596
IFITM2	1.11519	11.0669	9.41544	1.52e-11	9.65e-11	15.7099
ISG15	1.11496	8.06176	8.70844	1.21e-10	6.5e-10	13.6185
NCK1-AS1	1.11469	5.74218	11.8331	2.07e-14	2.31e-13	22.3841
CCRL2	1.11438	5.22598	10.6215	5.13e-13	4.36e-12	19.1337
NAP1L1	1.11412	9.23874	11.5218	4.63e-14	4.85e-13	21.5668
EXOSC5	1.11333	7.12471	15.9845	1.3e-18	4.07e-17	32.1674
HIST1H3E	1.11303	4.08588	6.78628	4.44e-08	1.56e-07	7.67324
KIAA0930	1.11272	6.56916	13.2295	6.41e-16	1.02e-14	25.8994
RND3	1.11223	8.70978	5.87022	8.13e-07	2.34e-06	4.76601
LINC01114	1.11121	4.52477	4.37047	9.05e-05	0.000191414	0.105367
FBXO17	1.11104	8.03609	7.35739	7.4e-09	2.94e-08	9.47137
C7orf31	1.11	5.56392	7.01224	2.18e-08	8.04e-08	8.38692
NPDC1	1.10956	7.53758	8.10739	7.35e-10	3.45e-09	11.7957
MCHR1	1.10949	4.01793	8.21477	5.31e-10	2.55e-09	12.1242
P2RX5	1.109	4.94748	8.64138	1.47e-10	7.78e-10	13.4171
LTC4S	1.10877	5.7122	10.1539	1.87e-12	1.42e-11	17.8283
COLGALT1	1.10857	6.63755	18.7664	5.31e-21	3.3e-19	37.7195
SLFN5	1.10839	5.74254	15.622	2.81e-18	8.03e-17	31.3894
HLA-DPB2	1.10831	3.3629	7.04482	1.97e-08	7.31e-08	8.48961
CARD6	1.10806	6.80681	6.74525	5.05e-08	1.76e-07	7.54339
TNFSF8	1.1077	4.54975	13.2726	5.78e-16	9.29e-15	26.0039
POU5F1P4	1.10705	6.01726	9.61968	8.45e-12	5.61e-11	16.3027
B2M	1.10683	10.3628	21.0073	9.98e-23	1e-20	41.7188
FDXR	1.10557	5.89538	13.6449	2.39e-16	4.23e-15	26.8991
TAPBP	1.10167	6.76971	15.4892	3.74e-18	1.03e-16	31.1012
PTPRK	1.10091	7.2501	8.79756	9.25e-11	5.1e-10	13.8854
FRZB	1.09977	5.86206	4.77726	2.58e-05	5.93e-05	1.33985
AXL	1.0995	7.2244	10.2326	1.5e-12	1.16e-11	18.0501
IL2RB	1.09894	6.31456	7.16846	1.34e-08	5.09e-08	8.87873
PER2	1.09832	6.21382	9.11635	3.62e-11	2.14e-10	14.8325
TRAF3IP2	1.09781	5.54312	14.8569	1.49e-17	3.49e-16	29.7027
STS	1.09612	5.50601	8.30834	4e-10	1.96e-09	12.4094
AL832909 /// LINC00984	1.09607	6.70084	7.27272	9.64e-09	3.75e-08	9.20607
HDC	1.09532	4.55775	11.9519	1.52e-14	1.76e-13	22.6925
RINT1	1.09378	6.72251	11.4743	5.25e-14	5.42e-13	21.4412
RPS3	1.09298	12.2429	14.518	3.19e-17	6.85e-16	28.9355
FBXL16	1.09262	5.89721	5.31461	4.75e-06	1.22e-05	3.01078
CEP120	1.09179	6.11649	12.6425	2.68e-15	3.69e-14	24.4511
CD151	1.09117	8.18227	8.52937	2.06e-10	1.06e-09	13.0796
IL15RA	1.091	6.78063	11.3325	7.62e-14	7.66e-13	21.0639
SUZ12P /// SUZ12P1	1.09046	4.8554	5.12968	8.52e-06	2.1e-05	2.43175
CSK	1.09033	7.50607	12.0782	1.1e-14	1.32e-13	23.0186
CENPE	1.09015	3.57465	9.81482	4.85e-12	3.38e-11	16.8642
AHRR	1.08978	4.76894	5.59675	1.94e-06	5.28e-06	3.89983
LOC284023	1.08902	5.84982	11.5186	4.67e-14	4.88e-13	21.5584
CLIC6	1.08862	5.07356	2.80881	0.00776226	0.0121327	-4.1636
CCDC88A	1.08856	3.99071	19.6126	1.13e-21	8.45e-20	39.2752
NFKBIE	1.088	6.89139	8.85945	7.7e-11	4.3e-10	14.0702
NEK5	1.08746	4.55413	5.91128	7.13e-07	2.07e-06	4.89627
SIPA1	1.08595	6.73886	13.8847	1.36e-16	2.57e-15	27.4672
BRCA1	1.08552	4.88198	27.4655	6.08e-27	2.11e-24	51.4223
CD47	1.08308	6.78221	13.8017	1.65e-16	3.04e-15	27.2714
SLAMF7	1.08301	4.60048	4.49578	6.16e-05	0.000133786	0.482119
OAS1	1.0829	6.97846	5.57868	2.06e-06	5.57e-06	3.84275
PMAIP1	1.081	4.1585	4.97504	1.39e-05	3.33e-05	1.95055
MFGE8	1.08061	6.41567	6.36791	1.67e-07	5.35e-07	6.34664
MKI67	1.07999	4.40984	12.2289	7.54e-15	9.35e-14	23.4049
LIF	1.07933	6.45307	4.30357	0.000111023	0.000231731	-0.0943063
RRN3	1.0789	7.72591	10.2732	1.34e-12	1.04e-11	18.164
MXI1	1.07848	10.8774	9.06016	4.27e-11	2.49e-10	14.6664
GDI1	1.0783	8.86942	8.52395	2.09e-10	1.08e-09	13.0632
IGK	1.07793	5.31976	3.68674	0.000696512	0.00128383	-1.87711
RPL10L	1.07789	5.34631	12.7877	1.87e-15	2.66e-14	24.8132
SYTL1	1.07732	5.2264	5.53357	2.37e-06	6.36e-06	3.70028
CD84	1.07715	4.71039	11.6492	3.33e-14	3.59e-13	21.9027
KCTD3	1.07661	8.01485	11.4387	5.76e-14	5.93e-13	21.3466
GM2A	1.07599	5.97184	13.1397	7.95e-16	1.23e-14	25.6805
LPAR5	1.07556	4.63664	7.88805	1.44e-09	6.43e-09	11.1212
CLTC-IT1	1.07556	4.23171	14.0725	8.81e-17	1.74e-15	27.9073
PSMB8-AS1	1.07549	5.74395	14.2654	5.66e-17	1.15e-15	28.3551
BTNL9	1.07517	6.64819	5.42384	3.36e-06	8.8e-06	3.35426
KLRD1	1.07475	4.23669	18.7974	5.02e-21	3.13e-19	37.7775
KCTD11	1.07471	5.95129	9.09226	3.88e-11	2.29e-10	14.7613
BID	1.0743	6.45662	11.1194	1.34e-13	1.28e-12	20.4924
CBLN3	1.07424	5.34645	8.19927	5.56e-10	2.67e-09	12.0768
CD300C	1.07394	5.05205	17.0413	1.48e-19	6.11e-18	34.3607
USP43	1.07361	4.54137	12.9546	1.25e-15	1.84e-14	25.2261
GIMAP1	1.07217	6.20354	11.7045	2.88e-14	3.15e-13	22.048
ANXA2	1.07043	9.13836	9.7521	5.79e-12	3.97e-11	16.6843
RAB6A	1.07016	3.89621	18.9608	3.71e-21	2.4e-19	38.082
FLJ45482	1.07012	5.73706	8.99568	5.16e-11	2.97e-10	14.4754
LYL1	1.06994	6.88344	13.8906	1.34e-16	2.53e-15	27.4809
KRT80	1.0697	5.04255	4.68945	3.38e-05	7.64e-05	1.07073
CDCA4	1.06922	5.81295	14.8711	1.45e-17	3.39e-16	29.7345
ARHGAP26	1.06861	5.26163	12.2278	7.56e-15	9.37e-14	23.4021
GPR132	1.06856	4.12271	18.134	1.75e-20	9.5e-19	36.5185
ASPM	1.06848	3.33664	11.1763	1.15e-13	1.12e-12	20.6456
ERGIC1	1.06845	6.71011	10.4634	7.92e-13	6.46e-12	18.6954
PRIM1	1.06838	6.21935	10.5979	5.48e-13	4.63e-12	19.0684
C12orf4	1.06824	6.42334	12.599	2.99e-15	4.07e-14	24.342
FGD6	1.06822	4.76339	12.9131	1.38e-15	2.02e-14	25.124
PCDHB7	1.06815	5.02246	3.78532	0.000522705	0.000982295	-1.60021
DAGLB	1.0668	5.33257	12.8288	1.69e-15	2.43e-14	24.9152
DDX58	1.06637	6.7327	8.38557	3.17e-10	1.58e-09	12.6442
GPR82	1.06617	3.25378	11.5601	4.19e-14	4.44e-13	21.6681
SDK1	1.06498	4.80875	6.18703	2.97e-07	9.15e-07	5.77204
VNN2	1.06467	5.90805	4.77137	2.62e-05	6.03e-05	1.32176
LOC100996412	1.06439	7.9549	6.58198	8.47e-08	2.83e-07	7.02608
CDKN1A	1.06437	9.1492	5.39509	3.68e-06	9.59e-06	3.26378
TFPI	1.06412	7.00723	5.7148	1.33e-06	3.72e-06	4.27334
AREG	1.06384	3.76105	4.46987	6.67e-05	0.00014393	0.403929
NLRP11	1.06364	4.22012	7.68657	2.67e-09	1.14e-08	10.4976
ARHGEF6	1.06329	7.7284	10.7159	3.97e-13	3.46e-12	19.3938
GUCY1A2	1.06314	5.05852	6.32471	1.91e-07	6.08e-07	6.20945
FMNL1	1.06088	4.93932	13.4221	4.04e-16	6.8e-15	26.3654
PRG2	1.06005	4.09829	9.96965	3.13e-12	2.28e-11	17.3063
TMEM255A	1.05969	4.52044	3.36747	0.00172925	0.00299346	-2.74872
MDFIC	1.05869	5.6681	10.2879	1.29e-12	1.01e-11	18.2053
FOS	1.05864	9.49445	2.57427	0.014001	0.0209626	-4.70777
SLCO2B1	1.05846	6.79956	6.40639	1.48e-07	4.77e-07	6.46885
C19orf10	1.05841	8.45651	10.5704	5.9e-13	4.95e-12	18.9924
GNAI2	1.05769	7.99623	10.7112	4.02e-13	3.5e-12	19.3808
ZC3HAV1L	1.05759	5.41959	13.1937	6.98e-16	1.1e-14	25.8122
ESAM	1.05751	7.61484	4.42707	7.61e-05	0.000162831	0.2751
RBM3	1.05644	7.46411	10.5963	5.5e-13	4.64e-12	19.064
NLRC4	1.0554	3.91506	10.8505	2.76e-13	2.47e-12	19.7625
FAM81B	1.05515	3.93217	3.14845	0.00316207	0.00524758	-3.32166
STX11	1.05326	4.0753	10.7515	3.6e-13	3.17e-12	19.4915
RAD54L	1.05293	4.38991	16.9586	1.75e-19	7.04e-18	34.1928
GNA13	1.05248	7.03395	12.8924	1.45e-15	2.12e-14	25.0728
C1orf54	1.05167	8.4064	8.32901	3.76e-10	1.85e-09	12.4723
SH3BGRL3	1.04916	8.90787	7.56639	3.87e-09	1.61e-08	10.1239
PTPN22	1.04862	3.19481	10.1325	1.98e-12	1.5e-11	17.7679
DCP1B	1.04792	7.27688	17.0316	1.51e-19	6.19e-18	34.341
HSD17B7	1.04736	8.55465	10.2483	1.44e-12	1.11e-11	18.0942
MT3	1.04562	6.13606	4.54048	5.37e-05	0.000117561	0.61732
CBX7	1.04534	8.60162	8.54327	1.97e-10	1.02e-09	13.1215
BTN2A2	1.04452	4.80831	17.0696	1.4e-19	5.84e-18	34.4179
ITGA3	1.04303	7.17514	7.18274	1.28e-08	4.88e-08	8.92361
NOD1	1.04283	6.15188	14.7113	2.06e-17	4.67e-16	29.3746
ANKRD36C	1.04215	3.74898	16.152	9.17e-19	2.98e-17	32.5222
TRAF3IP3	1.04204	4.69571	9.62088	8.42e-12	5.6e-11	16.3062
SLC25A43	1.0418	7.12413	8.46327	2.51e-10	1.27e-09	12.8797
CST3	1.04142	6.94823	6.94416	2.7e-08	9.82e-08	8.17218
SCARF1	1.04012	5.0693	12.2849	6.54e-15	8.24e-14	23.5479
SHISA9	1.04008	5.28507	5.1998	6.83e-06	1.71e-05	2.6509
HEATR5B /// HEATR5B	1.03972	5.76786	13.9379	1.2e-16	2.3e-15	27.5922
DUSP23	1.03874	8.70954	6.89913	3.11e-08	1.12e-07	8.03
TWIST1	1.03727	3.84302	11.1061	1.39e-13	1.32e-12	20.4564
ADAMTS5	1.03721	6.37309	4.29635	0.000113491	0.000236521	-0.115796
TSPO	1.03716	8.84048	10.6988	4.16e-13	3.61e-12	19.3466
FAM124B	1.03704	4.25615	7.56865	3.84e-09	1.6e-08	10.131
FAM89B	1.03606	7.19866	10.7921	3.23e-13	2.87e-12	19.6028
EMB	1.036	4.64211	9.75794	5.69e-12	3.91e-11	16.701
LOXL3	1.03562	6.15648	12.2303	7.51e-15	9.33e-14	23.4087
CLIP2	1.03363	6.05796	5.95116	6.28e-07	1.84e-06	5.02287
FAM114A1	1.03278	7.0249	10.8207	2.99e-13	2.66e-12	19.681
NUP85	1.03273	7.5591	14.1842	6.81e-17	1.37e-15	28.1671
PSORS1C2	1.0324	4.7178	13.6198	2.53e-16	4.45e-15	26.8394
FAM13A-AS1	1.03194	6.4638	8.28866	4.24e-10	2.07e-09	12.3495
MEGF6	1.03101	5.70165	8.48632	2.34e-10	1.2e-09	12.9495
IBSP	1.0303	3.89057	4.15148	0.000176031	0.000356167	-0.54413
TEAD4	1.02978	6.34723	8.26818	4.51e-10	2.19e-09	12.2871
TPM1	1.02904	8.26841	9.26005	2.38e-11	1.46e-10	15.2554
PAPD7	1.02691	8.22709	13.5038	3.33e-16	5.72e-15	26.5618
SLC9B2	1.02575	4.07762	9.24935	2.46e-11	1.51e-10	15.224
KMT2E	1.02529	8.45547	11.6374	3.43e-14	3.69e-13	21.8717
SOX17	1.02525	5.16146	5.15709	7.82e-06	1.94e-05	2.51735
VEGFC	1.02489	6.45561	5.91785	6.99e-07	2.03e-06	4.91715
SKA3	1.02356	4.57232	12.8475	1.62e-15	2.33e-14	24.9616
MARCKSL1	1.02308	8.10145	4.72348	3.04e-05	6.92e-05	1.17487
MGARP	1.02266	6.07292	2.26961	0.0288985	0.0411299	-5.36344
HIST1H2BC	1.02201	5.73485	3.88346	0.000391728	0.000750558	-1.32123
TRPC2	1.02199	4.30562	6.71702	5.52e-08	1.91e-07	7.45403
THSD7B	1.0217	4.5049	5.29403	5.07e-06	1.29e-05	2.94615
KCNN3	1.02089	5.15524	7.02028	2.12e-08	7.85e-08	8.41226
HIST1H1C	1.02074	8.77255	4.51524	5.8e-05	0.000126524	0.540926
HES4	1.02004	6.65427	4.57038	4.9e-05	0.000107849	0.707975
IGHM	1.01985	5.89522	3.76989	0.000546829	0.00102519	-1.64378
LOC157562	1.01901	6.02305	9.89254	3.89e-12	2.76e-11	17.0865
KIAA0922	1.01873	6.51941	12.5769	3.15e-15	4.28e-14	24.2866
ADAM28	1.01856	5.16794	9.31449	2.03e-11	1.27e-10	15.415
LY75	1.01804	6.9252	4.52964	5.55e-05	0.000121354	0.584483
HCST	1.01781	6.51698	8.05536	8.61e-10	4e-09	11.6361
IFITM1	1.01776	9.84475	7.17806	1.3e-08	4.95e-08	8.90888
DAPP1	1.01753	4.68913	14.9086	1.33e-17	3.15e-16	29.8186
CPOX	1.01704	7.2518	8.41007	2.94e-10	1.48e-09	12.7185
GPSM2	1.01661	5.08978	11.2057	1.07e-13	1.04e-12	20.7245
NIM1K	1.01642	4.6374	8.00628	1e-09	4.6e-09	11.4853
RPA1	1.0148	6.98256	15.333	5.24e-18	1.39e-16	30.7597
CEBPA	1.01473	6.35355	7.03337	2.04e-08	7.55e-08	8.45352
LOC100132057	1.01472	4.55073	12.4726	4.09e-15	5.4e-14	24.024
NACAP1	1.014	11.5862	29.2378	6.06e-28	3.04e-25	53.7089
SWAP70	1.01367	7.43651	10.8377	2.85e-13	2.55e-12	19.7275
SLC16A1-AS1	1.01292	4.18814	16.061	1.11e-18	3.51e-17	32.3299
SAMD9L	1.01278	6.11708	6.20852	2.77e-07	8.58e-07	5.84031
MAP2	1.01232	5.41847	9.43401	1.44e-11	9.19e-11	15.764
CDC45	1.01114	4.7343	13.1456	7.84e-16	1.22e-14	25.6948
SNX10	1.00927	9.49621	5.8836	7.79e-07	2.25e-06	4.80844
CCL8	1.00887	6.48237	2.4454	0.0191372	0.028084	-4.9925
RAPGEF6	1.00831	5.49935	10.6619	4.6e-13	3.95e-12	19.245
S100PBP	1.00817	6.96758	13.7923	1.69e-16	3.1e-15	27.2491
BTG1	1.00812	8.41741	12.359	5.43e-15	6.99e-14	23.7364
HSP90B1	1.00803	8.22124	4.237	0.000135919	0.000279788	-0.291923
KCNMA1	1.00795	4.71145	8.36368	3.38e-10	1.68e-09	12.5777
TTC9C	1.00688	6.03	12.9357	1.3e-15	1.92e-14	25.1795
MALL	1.00639	7.13155	5.78842	1.05e-06	2.98e-06	4.50659
TRIP13	1.00532	5.39758	6.44543	1.31e-07	4.25e-07	6.59279
PANX1	1.00524	5.74237	13.4289	3.98e-16	6.71e-15	26.3818
PHLDA1	1.00433	6.97079	7.21345	1.16e-08	4.46e-08	9.02006
FABP6	1.004	4.27471	9.89551	3.86e-12	2.74e-11	17.095
PRKCH	1.00395	5.98432	17.1588	1.17e-19	5.01e-18	34.5979
SPDYE2	1.00311	6.73378	5.9517	6.27e-07	1.84e-06	5.02457
EIF3E	1.00247	8.25711	15.2424	6.39e-18	1.65e-16	30.5603
BNIP3L	1.00238	10.6345	9.98782	2.97e-12	2.17e-11	17.3579
MRC1	1.00225	8.31643	4.01869	0.000262197	0.000517871	-0.931804
RIT1	1.00197	7.5265	7.11519	1.58e-08	5.96e-08	8.7112
RASL12	1.00149	6.19775	5.13713	8.32e-06	2.06e-05	2.45501
RLF	1.0014	7.77425	13.9699	1.12e-16	2.16e-15	27.6672
NGF	1.00101	5.52074	6.95364	2.62e-08	9.55e-08	8.20208
FAM64A	1.00096	4.33767	16.8812	2.05e-19	8.1e-18	34.0353
NCAPH	1.00016	4.44972	10.8311	2.91e-13	2.6e-12	19.7096
CPNE2	1.00005	7.83751	8.94731	5.94e-11	3.38e-10	14.3318
ISCU	-1.00018	11.5615	-20.3442	3.12e-22	2.76e-20	40.5749
DNAJC28	-1.00073	3.64952	-13.4531	3.75e-16	6.38e-15	26.44
AIFM3	-1.00189	5.24208	-12.1876	8.36e-15	1.03e-13	23.2995
LOC101928076	-1.00207	3.79642	-8.4168	2.88e-10	1.45e-09	12.7389
SLC22A1	-1.00283	3.83928	-12.2664	6.85e-15	8.58e-14	23.5008
CIRH1A	-1.00342	9.48639	-7.19656	1.22e-08	4.69e-08	8.96702
ATP6V0E2-AS1	-1.00357	4.15605	-10.4972	7.22e-13	5.93e-12	18.7895
CDO1	-1.00374	4.05212	-10.4252	8.8e-13	7.12e-12	18.589
LARS2	-1.00418	7.1426	-12.9445	1.28e-15	1.89e-14	25.2013
RAB11FIP3	-1.00453	8.94881	-5.79764	1.02e-06	2.9e-06	4.53583
PDGFRA	-1.0048	4.52002	-8.16198	6.23e-10	2.96e-09	11.9628
SETMAR	-1.00489	4.85857	-18.2758	1.34e-20	7.49e-19	36.7908
CYB5D2	-1.00597	7.93287	-11.9791	1.42e-14	1.66e-13	22.763
ZBED5-AS1	-1.00631	8.09276	-8.55781	1.89e-10	9.82e-10	13.1654
SEMA5A	-1.00699	7.35958	-5.49283	2.7e-06	7.16e-06	3.57171
ADAL	-1.00872	4.92202	-15.5742	3.12e-18	8.74e-17	31.2859
POLDIP2	-1.00901	8.64123	-14.7509	1.89e-17	4.35e-16	29.4642
STAC	-1.01018	6.67873	-8.96147	5.7e-11	3.25e-10	14.3739
HSD17B10	-1.01062	9.27078	-11.7005	2.91e-14	3.18e-13	22.0374
LOC102723886	-1.01077	3.84053	-10.9299	2.23e-13	2.03e-12	19.9789
WBSCR17	-1.01114	4.90009	-14.5559	2.93e-17	6.34e-16	29.0219
MRGBP	-1.01131	5.91347	-10.1668	1.8e-12	1.37e-11	17.8648
MYO6	-1.0124	8.27402	-6.62517	7.39e-08	2.5e-07	7.16299
PSMA5	-1.01322	7.84714	-7.86737	1.53e-09	6.82e-09	11.0573
PGLYRP4	-1.01498	5.01528	-11.5619	4.17e-14	4.42e-13	21.673
NDUFB3	-1.01505	9.637	-15.1304	8.16e-18	2.04e-16	30.3129
RMST	-1.01641	4.19445	-8.21537	5.3e-10	2.55e-09	12.126
MYLK4	-1.01801	4.24948	-6.61408	7.65e-08	2.58e-07	7.12786
GLUD1	-1.01829	9.11081	-10.0338	2.61e-12	1.93e-11	17.4885
CAHM	-1.01834	4.62451	-9.11007	3.69e-11	2.18e-10	14.814
NR2F1	-1.01848	7.88733	-2.79927	0.00795475	0.0124146	-4.18635
C21orf62	-1.01922	5.58663	-7.38609	6.77e-09	2.71e-08	9.56117
PRTG	-1.01937	3.74405	-14.8909	1.38e-17	3.26e-16	29.7791
ADAMTSL2	-1.01941	5.15899	-10.2572	1.4e-12	1.09e-11	18.119
PNPO	-1.01948	8.17712	-8.31296	3.94e-10	1.94e-09	12.4235
LINC00622	-1.01982	6.12826	-5.38725	3.77e-06	9.81e-06	3.23909
CACNB4	-1.01986	3.77156	-14.4285	3.9e-17	8.25e-16	28.7307
ZYG11A	-1.01998	5.13916	-7.00938	2.2e-08	8.1e-08	8.3779
CPNE4	-1.02075	3.11687	-16.6601	3.21e-19	1.19e-17	33.5819
INA	-1.02146	4.67069	-12.7477	2.07e-15	2.92e-14	24.7136
GJA3	-1.02204	4.27848	-13.0306	1.04e-15	1.56e-14	25.4133
NEUROD4	-1.02206	4.01749	-15.909	1.53e-18	4.64e-17	32.0064
EPB41L3	-1.02246	8.03325	-6.60868	7.78e-08	2.62e-07	7.11073
PCBP4	-1.02297	6.6654	-14.3889	4.27e-17	8.94e-16	28.6397
SLC6A13	-1.02538	10.1328	-2.80507	0.00783727	0.0122424	-4.17253
ACY3	-1.02565	7.36641	-5.2708	5.46e-06	1.38e-05	2.8733
AMFR	-1.0269	6.83962	-6.02736	4.93e-07	1.47e-06	5.26482
IQCH-AS1	-1.02879	6.28	-11.9729	1.44e-14	1.68e-13	22.747
CELSR3-AS1	-1.02886	4.02842	-16.2072	8.17e-19	2.7e-17	32.6386
ITPR1-AS1	-1.02998	4.57006	-5.67327	1.52e-06	4.2e-06	4.14187
LOC101929747	-1.031	4.54436	-15.1074	8.58e-18	2.14e-16	30.2617
LOC100289098	-1.03122	6.69889	-9.20025	2.83e-11	1.71e-10	15.0797
RAB29	-1.0317	8.16609	-9.76659	5.56e-12	3.82e-11	16.7259
SLC9A3	-1.03172	4.47977	-14.9372	1.25e-17	2.99e-16	29.8827
KIAA1161	-1.0326	5.13591	-12.6684	2.51e-15	3.48e-14	24.5158
COL4A5	-1.03293	5.00567	-8.92582	6.33e-11	3.59e-10	14.2679
TRIM50	-1.03299	4.3497	-14.6765	2.23e-17	5.01e-16	29.2958
C11orf86	-1.03348	5.71728	-14.293	5.31e-17	1.09e-15	28.4189
OXNAD1	-1.0335	6.93858	-9.41443	1.52e-11	9.68e-11	15.707
PLEKHB1	-1.03457	4.37626	-17.8849	2.82e-20	1.44e-18	36.036
PCYOX1	-1.03472	9.26226	-6.84683	3.67e-08	1.31e-07	7.86474
CTC-360P9.3	-1.03501	4.9864	-19.8976	6.82e-22	5.57e-20	39.7865
CORT	-1.03503	4.41082	-18.0901	1.9e-20	1.02e-18	36.4338
METTL7B	-1.03515	8.37544	-3.95097	0.000320764	0.000623506	-1.12752
GPR113	-1.03541	3.90535	-7.93497	1.24e-09	5.64e-09	11.2658
TMEM139	-1.03551	7.8094	-6.71725	5.52e-08	1.91e-07	7.45474
SLC5A10	-1.03563	8.63724	-3.3756	0.0016904	0.0029309	-2.72706
AB074162 /// MIR181A2HG	-1.03618	5.58335	-7.2286	1.11e-08	4.27e-08	9.06764
ASAP2	-1.03715	8.97844	-7.71265	2.46e-09	1.06e-08	10.5785
ADRA2C	-1.03847	5.79341	-9.44536	1.39e-11	8.92e-11	15.797
NCKAP5	-1.03883	4.07122	-7.89665	1.4e-09	6.28e-09	11.1477
CLYBL	-1.03912	6.02559	-9.61358	8.59e-12	5.7e-11	16.2851
KIAA2022	-1.03916	3.69052	-10.053	2.48e-12	1.84e-11	17.5431
SLC30A8	-1.04092	4.04194	-9.5644	9.89e-12	6.49e-11	16.1428
MACROD1	-1.04114	5.94909	-10.9357	2.19e-13	2.01e-12	19.9947
TTC18	-1.04149	5.6228	-8.12473	6.97e-10	3.28e-09	11.8488
CTNNAL1	-1.04164	8.2193	-8.29162	4.2e-10	2.06e-09	12.3585
ALDH3A2	-1.04208	9.62503	-5.32265	4.63e-06	1.19e-05	3.03603
ZNF788 /// ZNF788	-1.04254	5.31712	-11.7508	2.56e-14	2.82e-13	22.1691
LOC103344931	-1.04313	6.02552	-15.4565	4.02e-18	1.1e-16	31.0298
C15orf37	-1.04349	5.92936	-5.9363	6.59e-07	1.92e-06	4.9757
SLC5A3	-1.04559	7.23002	-4.44593	7.18e-05	0.000154304	0.331823
SLC25A38	-1.04601	7.47655	-15.5421	3.34e-18	9.29e-17	31.2163
CLDN11	-1.04665	4.42044	-11.4442	5.68e-14	5.85e-13	21.3615
SUSD3	-1.04694	5.50442	-11.6261	3.53e-14	3.79e-13	21.842
SLC14A1	-1.04917	5.90399	-3.11933	0.00342163	0.00564721	-3.39617
BTBD11	-1.04986	4.96362	-3.69116	0.000687638	0.00126851	-1.86476
FRAS1	-1.05008	5.03965	-16.0871	1.05e-18	3.35e-17	32.3851
RIMBP2	-1.05105	3.67906	-18.3413	1.18e-20	6.82e-19	36.9159
LOH12CR2	-1.05214	5.06752	-9.89778	3.83e-12	2.73e-11	17.1014
ADH5	-1.05256	9.95739	-11.226	1.01e-13	9.93e-13	20.7791
FLRT1	-1.05415	5.34171	-10.5058	7.05e-13	5.81e-12	18.8132
AFP	-1.05527	4.87169	-9.16904	3.1e-11	1.87e-10	14.9878
C7orf55	-1.0561	7.99112	-11.1826	1.13e-13	1.1e-12	20.6624
TACSTD2	-1.05654	5.23684	-9.7142	6.45e-12	4.38e-11	16.5753
DACH2	-1.05698	3.09072	-9.9521	3.29e-12	2.38e-11	17.2563
KLF15	-1.05792	6.79044	-7.08719	1.72e-08	6.47e-08	8.62305
IDO2	-1.058	3.44874	-9.84575	4.44e-12	3.12e-11	16.9528
RBPMS2	-1.05803	7.25762	-5.09144	9.61e-06	2.35e-05	2.31248
GOT2	-1.0591	9.6079	-8.21564	5.29e-10	2.55e-09	12.1268
CTSA	-1.05921	10.3816	-7.89038	1.43e-09	6.39e-09	11.1283
TMEM117	-1.05992	5.49351	-9.48004	1.26e-11	8.12e-11	15.8979
SMPDL3B	-1.06094	5.26912	-8.79148	9.42e-11	5.18e-10	13.8673
RNF2	-1.06171	5.41212	-13.3537	4.76e-16	7.86e-15	26.2004
BTNL3	-1.06233	5.79666	-14.2795	5.48e-17	1.12e-15	28.3877
TNMD	-1.06269	4.03204	-4.30524	0.000110459	0.000230672	-0.0893331
CTTNBP2	-1.06372	6.49112	-5.3418	4.36e-06	1.12e-05	3.09617
GDNF	-1.06399	4.69139	-16.7035	2.94e-19	1.1e-17	33.6712
NKIRAS1	-1.0671	7.11265	-12.1334	9.59e-15	1.17e-13	23.1606
RNF123	-1.06765	7.01167	-11.291	8.5e-14	8.46e-13	20.9533
ENDOG	-1.0677	7.45361	-7.04564	1.96e-08	7.29e-08	8.49219
TSTD1	-1.0681	9.1066	-11.1636	1.19e-13	1.15e-12	20.6114
FABP3	-1.06883	7.99895	-4.76996	2.63e-05	6.06e-05	1.31744
NOS1AP	-1.06917	4.54662	-18.7736	5.24e-21	3.26e-19	37.733
SEPP1	-1.06964	9.56003	-7.07815	1.77e-08	6.63e-08	8.59459
ACN9	-1.07009	7.07449	-10.542	6.38e-13	5.32e-12	18.9136
DHRS4-AS1	-1.07025	5.85562	-11.1298	1.3e-13	1.25e-12	20.5203
LINC00853	-1.07056	4.3823	-7.82489	1.74e-09	7.7e-09	10.9261
PHYHIPL	-1.07249	7.24714	-5.71462	1.33e-06	3.72e-06	4.27277
CYP4F11	-1.0725	3.70922	-4.11421	0.000196939	0.000395889	-0.653447
KEL	-1.07257	5.37354	-17.5231	5.71e-20	2.68e-18	35.3254
EMCN	-1.07263	8.65383	-2.93341	0.0056156	0.00897321	-3.86176
NIPSNAP1	-1.07267	8.69379	-8.57214	1.81e-10	9.43e-10	13.2086
LY6G6C	-1.07365	4.54225	-19.5397	1.29e-21	9.46e-20	39.1434
SLC43A2	-1.07528	6.52184	-10.2024	1.63e-12	1.25e-11	17.965
C11orf63	-1.07594	5.28916	-11.1519	1.23e-13	1.19e-12	20.5798
SBSN	-1.07695	3.89009	-17.3131	8.64e-20	3.83e-18	34.9075
ADI1	-1.07725	9.18013	-7.62667	3.21e-09	1.35e-08	10.3115
MFSD12	-1.07739	7.05887	-10.6672	4.53e-13	3.9e-12	19.2596
IGSF5	-1.07931	3.52407	-9.42095	1.49e-11	9.52e-11	15.7259
RBM11	-1.07937	3.27903	-10.0707	2.36e-12	1.76e-11	17.5932
KLHL3	-1.08069	5.22409	-11.8026	2.24e-14	2.48e-13	22.3046
KCNRG	-1.08168	3.98582	-14.8259	1.6e-17	3.72e-16	29.633
SCGB2A1	-1.08175	3.79983	-4.66742	3.62e-05	8.15e-05	1.0034
C11orf85	-1.08227	4.82917	-12.4548	4.27e-15	5.62e-14	23.9789
LINC00323	-1.08273	3.06593	-5.08201	9.9e-06	2.42e-05	2.2831
IL25	-1.08308	4.4347	-22.1686	1.46e-23	1.91e-21	43.6478
OGG1	-1.08331	6.18109	-13.8616	1.44e-16	2.68e-15	27.4128
GADD45A	-1.08393	10.2826	-4.7921	2.46e-05	5.68e-05	1.38547
ARNT2	-1.08507	6.82036	-6.07386	4.25e-07	1.28e-06	5.41253
TRHDE	-1.08528	6.97657	-3.27036	0.00226479	0.00384447	-3.00545
OR2F1	-1.08677	4.16042	-21.7776	2.76e-23	3.25e-21	43.0086
FLJ39080	-1.08717	3.8192	-15.6293	2.77e-18	7.93e-17	31.4053
DACT2	-1.08789	5.48921	-7.20472	1.19e-08	4.58e-08	8.99264
LIX1	-1.0886	3.77227	-4.14524	0.000179376	0.000362611	-0.562469
MSRB1	-1.08864	9.91877	-6.18647	2.97e-07	9.17e-07	5.77027
CCDC154	-1.08895	5.49048	-13.8089	1.62e-16	3e-15	27.2884
KCTD6	-1.08917	6.67589	-11.2528	9.4e-14	9.3e-13	20.8509
ARHGEF3	-1.08937	8.70335	-12.3702	5.28e-15	6.81e-14	23.7649
ADTRP	-1.0896	4.7462	-6.15266	3.31e-07	1.01e-06	5.66285
AKAP3	-1.08965	4.77096	-13.9698	1.12e-16	2.16e-15	27.667
TRPM3	-1.09083	5.41777	-5.82558	9.37e-07	2.67e-06	4.6244
FRK	-1.09102	6.31522	-8.42338	2.83e-10	1.43e-09	12.7589
LINC00271	-1.0916	3.98768	-15.9645	1.36e-18	4.23e-17	32.1247
SCN7A	-1.09195	3.1888	-17.432	6.83e-20	3.11e-18	35.1445
PEBP1	-1.09468	11.6713	-9.87078	4.14e-12	2.92e-11	17.0243
KCNJ16	-1.09622	9.33225	-8.81855	8.69e-11	4.81e-10	13.9482
HOXA6	-1.09624	5.09113	-12.009	1.32e-14	1.55e-13	22.8401
NAP1L3	-1.09847	5.02859	-4.68169	3.47e-05	7.81e-05	1.047
ANKRD9	-1.09873	6.30635	-13.8114	1.61e-16	2.99e-15	27.2941
LOC100505942	-1.09883	4.97648	-11.5406	4.41e-14	4.64e-13	21.6166
POP5	-1.09933	8.8205	-9.60558	8.79e-12	5.82e-11	16.262
CBR1	-1.10168	8.89983	-8.6593	1.4e-10	7.42e-10	13.471
STOX1	-1.10179	3.91962	-14.1587	7.22e-17	1.45e-15	28.1079
RGS7	-1.10325	3.82933	-3.85082	0.000431291	0.000820976	-1.41436
ZNF502	-1.10507	5.66968	-11.3333	7.6e-14	7.65e-13	21.0661
BRINP3	-1.10513	3.00327	-10.4177	8.98e-13	7.25e-12	18.5682
MCUR1	-1.10623	8.25226	-12.2199	7.71e-15	9.54e-14	23.3821
CYCS	-1.10636	7.49979	-8.23733	4.95e-10	2.39e-09	12.193
TRIM2	-1.10789	5.55024	-8.65281	1.42e-10	7.55e-10	13.4515
SIX4	-1.10935	3.6049	-22.515	8.38e-24	1.25e-21	44.2059
LEAP2	-1.11179	7.63997	-5.67067	1.53e-06	4.23e-06	4.13364
SHC3	-1.11229	4.64482	-18.3356	1.19e-20	6.85e-19	36.9051
RASSF1-AS1	-1.11319	4.77748	-15.0894	8.93e-18	2.22e-16	30.222
VSNL1	-1.11348	3.9254	-13.509	3.29e-16	5.66e-15	26.5742
SPTBN2	-1.11464	5.5311	-8.98119	5.38e-11	3.09e-10	14.4324
COMMD8	-1.11471	9.70649	-12.9231	1.35e-15	1.98e-14	25.1487
GREB1	-1.11544	3.86112	-17.2044	1.07e-19	4.64e-18	34.6896
ODAM	-1.1155	3.43616	-14.3171	5.03e-17	1.04e-15	28.4745
MPP5	-1.11574	7.85124	-10.5801	5.75e-13	4.83e-12	19.0192
MPV17L2	-1.1163	6.59157	-16.3707	5.82e-19	1.99e-17	32.9816
TLN2	-1.11634	6.35733	-12.0352	1.23e-14	1.46e-13	22.9078
SLC30A9	-1.11641	7.80995	-11.5206	4.65e-14	4.86e-13	21.5638
NDRG4	-1.11642	4.8836	-15.3732	4.81e-18	1.29e-16	30.8476
LOC646903	-1.11668	3.40241	-10.4071	9.25e-13	7.44e-12	18.5387
TPTEP1	-1.11876	4.16057	-17.9489	2.49e-20	1.29e-18	36.1605
CAMSAP3	-1.11965	5.74776	-9.20019	2.83e-11	1.71e-10	15.0795
SSPO	-1.12131	6.37142	-20.6243	1.92e-22	1.79e-20	41.062
CYP2A13	-1.12151	5.21713	-18.0015	2.26e-20	1.18e-18	36.2624
CDH3	-1.12201	5.42459	-13.9147	1.27e-16	2.42e-15	27.5377
C2orf54	-1.12233	4.66496	-6.35875	1.72e-07	5.48e-07	6.31756
SPNS2	-1.12374	7.52285	-8.89612	6.91e-11	3.9e-10	14.1795
FAM83D	-1.12469	6.21726	-5.05183	1.09e-05	2.65e-05	2.18913
CDKL1	-1.12546	5.0445	-13.2546	6.03e-16	9.66e-15	25.9604
MAP9	-1.12613	5.92717	-5.9124	7.11e-07	2.06e-06	4.89985
RBM26-AS1	-1.12725	4.81193	-9.23388	2.57e-11	1.57e-10	15.1786
SDR42E1	-1.1273	5.07508	-8.97417	5.49e-11	3.14e-10	14.4116
MUT	-1.12836	8.97219	-9.41624	1.52e-11	9.64e-11	15.7122
SGPP1	-1.1304	7.95379	-12.1906	8.3e-15	1.02e-13	23.3072
PKIA	-1.13148	4.48943	-4.45243	7.04e-05	0.00015138	0.35137
FGFBP1	-1.13297	5.34859	-17.1233	1.26e-19	5.32e-18	34.5263
LOC101927131	-1.13382	4.76024	-24.8598	2.33e-25	5.42e-23	47.7904
DCDC2	-1.134	5.90351	-4.47915	6.49e-05	0.000140206	0.431906
GPR143	-1.13682	5.14979	-4.66932	3.6e-05	8.1e-05	1.00922
GPX3	-1.13769	13.3112	-6.02588	4.95e-07	1.47e-06	5.26013
AGR2	-1.1377	4.20905	-6.51263	1.05e-07	3.48e-07	6.80607
LYPLAL1	-1.13843	9.1907	-10.5014	7.13e-13	5.87e-12	18.8011
C1orf53	-1.14128	4.74698	-7.42982	5.91e-09	2.39e-08	9.6979
RDH10	-1.14144	6.09333	-11.4272	5.94e-14	6.09e-13	21.3162
VEPH1	-1.14178	6.14206	-7.00408	2.24e-08	8.23e-08	8.3612
DUOX2	-1.1422	3.36612	-12.0566	1.17e-14	1.39e-13	22.963
NOS1	-1.14233	4.49311	-21.1277	8.15e-23	8.45e-21	41.9231
CHCHD4	-1.14248	7.64411	-22.2391	1.3e-23	1.8e-21	43.7621
PPP1R1B	-1.14273	5.0396	-12.4267	4.58e-15	5.99e-14	23.9079
GIPC2	-1.1443	8.27089	-4.27297	0.000121857	0.000252671	-0.185288
ZNF582-AS1	-1.14442	5.16355	-13.9138	1.27e-16	2.42e-15	27.5356
ASAP3	-1.1445	5.89162	-8.00225	1.01e-09	4.65e-09	11.4729
BDH1	-1.14468	5.49063	-14.49	3.39e-17	7.27e-16	28.8714
PRKCQ-AS1	-1.14635	4.71756	-7.26868	9.76e-09	3.8e-08	9.1934
CELP	-1.14699	5.06141	-10.54	6.42e-13	5.34e-12	18.9082
CHP1	-1.1475	7.85279	-12.9371	1.3e-15	1.92e-14	25.1832
SLC25A5	-1.14819	11.6164	-11.1497	1.24e-13	1.19e-12	20.574
NAT8L	-1.14969	5.54081	-11.0929	1.44e-13	1.37e-12	20.4208
LOC101926906	-1.15301	4.67693	-7.07646	1.78e-08	6.67e-08	8.58926
TEX13B	-1.15371	4.57759	-21.9741	2e-23	2.53e-21	43.3311
CLMN	-1.15441	7.11194	-9.67854	7.14e-12	4.8e-11	16.4726
EVPL	-1.15446	5.72923	-13.1166	8.41e-16	1.29e-14	25.6239
FAM104B	-1.15459	5.81039	-15.9573	1.38e-18	4.26e-17	32.1094
ACSS3	-1.15529	7.53741	-4.62507	4.13e-05	9.21e-05	0.874245
DEPDC7	-1.15553	7.97745	-5.10662	9.16e-06	2.25e-05	2.3598
PALM3	-1.15625	7.18446	-6.97935	2.42e-08	8.85e-08	8.28319
GSTA3	-1.15656	8.40638	-5.43047	3.29e-06	8.62e-06	3.37515
RAB11FIP4	-1.15694	5.28565	-19.831	7.68e-22	6.12e-20	39.6676
ATP5G1	-1.15822	9.21271	-13.2443	6.18e-16	9.87e-15	25.9354
EMX2	-1.15866	8.96633	-3.12718	0.00334974	0.00553748	-3.37612
CPEB3	-1.15924	4.97663	-15.2779	5.91e-18	1.55e-16	30.6384
SIRT4	-1.15987	4.50458	-14.3574	4.58e-17	9.57e-16	28.5674
KIAA1522	-1.1601	7.91843	-15.2056	6.92e-18	1.77e-16	30.4792
RBP5	-1.16082	10.5621	-4.58236	4.72e-05	0.000104219	0.744345
PDZRN3	-1.16284	4.98847	-7.09128	1.7e-08	6.39e-08	8.63592
SLC25A39	-1.16419	8.24448	-11.7033	2.89e-14	3.16e-13	22.0448
RENBP	-1.16458	6.08913	-5.55359	2.23e-06	6e-06	3.76347
IDH1	-1.16503	8.58531	-8.60333	1.65e-10	8.65e-10	13.3026
C9orf173	-1.16533	4.90631	-15.922	1.49e-18	4.52e-17	32.0341
SCRN2	-1.16557	7.20701	-12.8255	1.71e-15	2.44e-14	24.907
RORB	-1.1657	3.45872	-7.93521	1.24e-09	5.64e-09	11.2666
C3orf52	-1.16578	4.66495	-11.3848	6.64e-14	6.76e-13	21.2035
PGAM2	-1.16653	4.62983	-6.27849	2.22e-07	6.97e-07	6.06263
NBPF4	-1.16722	3.35428	-22.2151	1.36e-23	1.81e-21	43.7231
PFKM	-1.16798	8.97257	-12.548	3.39e-15	4.54e-14	24.2138
LOC102723847	-1.1682	4.68277	-18.0579	2.02e-20	1.08e-18	36.3718
UBE2QL1	-1.16891	5.91357	-4.85667	2.01e-05	4.7e-05	1.58435
LOC100289361	-1.16906	6.00366	-9.75134	5.8e-12	3.98e-11	16.6821
LSM3	-1.16944	6.95536	-17.6481	4.47e-20	2.14e-18	35.5723
TMED4	-1.17027	7.26957	-15.0629	9.46e-18	2.34e-16	30.163
ALDH5A1	-1.17114	6.98507	-9.68041	7.1e-12	4.77e-11	16.478
KCNK5	-1.1718	7.61912	-4.88026	1.87e-05	4.39e-05	1.65717
KGFLP2	-1.17315	5.32975	-7.84699	1.63e-09	7.23e-09	10.9944
FH	-1.17386	8.1575	-10.3434	1.1e-12	8.74e-12	18.3608
ADRB1	-1.17517	3.567	-16.5729	3.84e-19	1.39e-17	33.4018
COBL	-1.17556	6.43953	-7.64762	3.01e-09	1.28e-08	10.3766
FMN2	-1.17625	3.8939	-19.7617	8.69e-22	6.76e-20	39.5435
SH3BGR	-1.17633	5.95656	-12.303	6.25e-15	7.93e-14	23.5939
LIPG	-1.17696	4.82525	-4.4719	6.63e-05	0.000143139	0.410052
NR0B2	-1.17848	6.40968	-12.7513	2.05e-15	2.89e-14	24.7227
MYOM3	-1.17865	6.24186	-7.50577	4.67e-09	1.91e-08	9.93502
KLHL14	-1.17866	4.07604	-11.5675	4.11e-14	4.36e-13	21.6877
C6orf136	-1.17965	7.42896	-10.4304	8.67e-13	7.03e-12	18.6035
FLJ22184	-1.1801	5.00359	-14.6417	2.41e-17	5.36e-16	29.2168
MCCC1	-1.18141	8.68319	-10.2964	1.26e-12	9.84e-12	18.2291
AUH	-1.18164	9.67234	-10.5438	6.35e-13	5.3e-12	18.9187
FERMT1	-1.18183	5.05025	-9.42211	1.49e-11	9.5e-11	15.7293
RELN	-1.18275	4.94709	-6.24811	2.44e-07	7.63e-07	5.9661
MAOA	-1.18369	8.75188	-4.64224	3.92e-05	8.76e-05	0.926578
MOGAT2	-1.18594	4.9279	-20.8052	1.41e-22	1.36e-20	41.3735
ABCA8	-1.18775	4.11428	-11.1525	1.23e-13	1.19e-12	20.5815
MPC1	-1.18801	6.80116	-17.0075	1.59e-19	6.45e-18	34.2921
PLLP	-1.18901	7.91039	-6.81264	4.08e-08	1.44e-07	7.75664
DBH-AS1	-1.18909	5.84957	-8.50746	2.2e-10	1.13e-09	13.0134
MROH7	-1.1893	5.0772	-8.93457	6.17e-11	3.5e-10	14.2939
FAM184A	-1.18949	5.09946	-10.0836	2.27e-12	1.7e-11	17.6298
NPY5R	-1.18973	4.36563	-7.66131	2.88e-09	1.23e-08	10.4192
RNF43	-1.19016	5.72909	-10.5516	6.22e-13	5.2e-12	18.9402
SLC7A10	-1.19109	4.43184	-17.7707	3.52e-20	1.72e-18	35.8129
PDHB	-1.1935	9.25	-18.702	5.99e-21	3.62e-19	37.5988
PIP5K1B	-1.19351	4.81858	-10.9883	1.9e-13	1.76e-12	20.1376
SLC3A2	-1.19496	8.98809	-8.49697	2.27e-10	1.16e-09	12.9817
OGN	-1.19534	4.10334	-3.46972	0.001297	0.00228851	-2.47402
DPP6	-1.19695	4.43124	-15.0226	1.03e-17	2.54e-16	30.0733
SPTSSB	-1.1974	3.23532	-24.2413	5.82e-25	1.23e-22	46.876
TOX	-1.19766	4.60416	-6.59979	8e-08	2.69e-07	7.08254
LDHB	-1.19969	12.624	-16.1239	9.72e-19	3.15e-17	32.4629
BMP7	-1.19971	4.78844	-28.3177	1.97e-27	8.25e-25	52.5391
PDZK1	-1.20015	10.6423	-6.08874	4.06e-07	1.22e-06	5.4598
CALCA	-1.20016	4.46805	-8.30112	4.09e-10	2e-09	12.3874
CNGA1	-1.20113	4.31898	-8.60219	1.65e-10	8.68e-10	13.2992
ST6GALNAC3	-1.20136	6.235	-5.29405	5.07e-06	1.29e-05	2.94622
ASB15	-1.20281	4.13031	-12.0547	1.17e-14	1.39e-13	22.958
CLEC4GP1	-1.203	3.8396	-16.9722	1.71e-19	6.87e-18	34.2204
NME5	-1.20336	7.77196	-5.21558	6.5e-06	1.63e-05	2.70027
PDZK1IP1	-1.204	11.6203	-5.55854	2.19e-06	5.91e-06	3.77912
MDH1	-1.20409	10.9818	-15.2762	5.94e-18	1.55e-16	30.6347
PCBD1	-1.2045	8.88575	-10.4038	9.33e-13	7.51e-12	18.5294
QDPR	-1.20467	7.50812	-12.7616	2e-15	2.82e-14	24.7482
DNASE1L3	-1.20522	5.72866	-7.95147	1.18e-09	5.38e-09	11.3167
ATP6	-1.2056	11.158	-26.6137	1.93e-26	5.65e-24	50.2724
NDUFS1	-1.20581	6.28885	-13.1708	7.38e-16	1.15e-14	25.7564
VAV3	-1.20673	8.02837	-8.14824	6.49e-10	3.08e-09	11.9208
GABARAPL1	-1.20927	8.21555	-11.8687	1.89e-14	2.13e-13	22.4768
LOC100505853	-1.20956	5.0546	-23.7934	1.14e-24	2.25e-22	46.2004
LINC00652	-1.21015	5.21546	-21.4225	4.97e-23	5.53e-21	42.419
DNASE1	-1.21059	5.04508	-13.2663	5.86e-16	9.41e-15	25.9888
STRADB	-1.21132	9.13374	-9.1017	3.78e-11	2.23e-10	14.7892
HBQ1	-1.21307	4.68425	-12.8562	1.58e-15	2.29e-14	24.9831
SPESP1	-1.21326	4.494	-5.00663	1.26e-05	3.03e-05	2.0486
ECHDC3	-1.21452	10.1503	-5.88793	7.68e-07	2.22e-06	4.82219
KMO	-1.21491	7.93757	-2.58124	0.0137627	0.02063	-4.69205
PAIP2B	-1.21515	6.97713	-6.84237	3.72e-08	1.32e-07	7.85064
THRB	-1.21579	5.63238	-11.3995	6.39e-14	6.53e-13	21.2424
C9orf24	-1.21588	5.5347	-11.9887	1.39e-14	1.62e-13	22.7879
ITLN1	-1.21654	4.17022	-6.13655	3.48e-07	1.06e-06	5.61167
USP46-AS1	-1.21668	3.88931	-16.5034	4.43e-19	1.58e-17	33.2578
RHBG	-1.21868	6.75241	-16.1849	8.56e-19	2.81e-17	32.5917
LIME1	-1.2209	7.60569	-6.93088	2.81e-08	1.02e-07	8.13025
SERPINC1	-1.22191	3.72802	-11.5158	4.71e-14	4.91e-13	21.5511
PIP	-1.22193	5.20346	-22.5661	7.72e-24	1.17e-21	44.2875
BTD	-1.22197	5.94059	-11.4969	4.94e-14	5.14e-13	21.5012
SLC25A20	-1.22386	7.58103	-18.1623	1.66e-20	9.03e-19	36.573
MISP	-1.22444	7.02102	-11.1706	1.17e-13	1.13e-12	20.6302
GCDH	-1.22523	7.19689	-10.6185	5.18e-13	4.4e-12	19.1253
MORN5	-1.22666	3.81681	-20.0572	5.15e-22	4.3e-20	40.07
SLC2A4	-1.22677	3.56592	-22.6163	7.13e-24	1.1e-21	44.3676
BLCAP	-1.22753	8.96692	-21.8206	2.58e-23	3.1e-21	43.0794
SLC25A5-AS1	-1.22884	4.57692	-16.2947	6.81e-19	2.29e-17	32.8225
C15orf59	-1.22922	4.5664	-18.7429	5.55e-21	3.42e-19	37.6756
ERMP1	-1.23178	8.09238	-8.39439	3.08e-10	1.54e-09	12.6709
NDUFA4	-1.23194	11.4669	-16.2032	8.24e-19	2.71e-17	32.6302
ACOT8	-1.23195	5.90881	-14.8941	1.37e-17	3.25e-16	29.7863
LINC00675	-1.23228	4.70426	-21.0854	8.75e-23	8.92e-21	41.8514
ACOT11	-1.23326	5.52521	-20.098	4.79e-22	4.04e-20	40.1421
LOC644090	-1.23394	5.68916	-5.71982	1.31e-06	3.66e-06	4.28924
PDHA1	-1.23413	8.9522	-13.9817	1.09e-16	2.11e-15	27.6951
CDHR2	-1.23489	7.25314	-5.25912	5.66e-06	1.43e-05	2.83667
PDP2	-1.23504	6.22653	-7.63784	3.1e-09	1.31e-08	10.3462
LINC00959	-1.23521	5.95781	-12.408	4.8e-15	6.24e-14	23.8606
MRPS25	-1.23619	6.51105	-17.1225	1.26e-19	5.32e-18	34.5247
MYO3B	-1.23913	3.42927	-8.87018	7.46e-11	4.18e-10	14.1022
UQCRFS1	-1.23928	11.0335	-16.3874	5.62e-19	1.94e-17	33.0164
ACO1	-1.24088	7.04238	-5.34291	4.34e-06	1.12e-05	3.09968
PTPN3	-1.24095	7.40229	-8.10608	7.38e-10	3.46e-09	11.7917
ABHD14B	-1.24192	8.75366	-8.70161	1.23e-10	6.62e-10	13.598
TACR2	-1.24244	4.80589	-22.2341	1.31e-23	1.8e-21	43.7539
NEFH	-1.24342	4.06114	-9.88567	3.96e-12	2.82e-11	17.0669
SLC51A	-1.24393	6.27957	-3.27664	0.00222586	0.00378686	-2.98898
WNK3	-1.24507	4.24106	-15.3071	5.55e-18	1.46e-16	30.7027
LINC00845	-1.24517	3.82223	-9.51667	1.13e-11	7.39e-11	16.0044
TJP3	-1.24518	5.32696	-19.24	2.22e-21	1.51e-19	38.5972
SLC6A16	-1.2455	5.26738	-5.66061	1.58e-06	4.36e-06	4.1018
LOC101929655	-1.24594	4.58573	-15.7544	2.12e-18	6.25e-17	31.6751
DHTKD1	-1.24659	8.46368	-6.89309	3.17e-08	1.14e-07	8.0109
C10orf126	-1.24685	3.48979	-15.1899	7.16e-18	1.82e-16	30.4445
LOC645321	-1.24712	4.56651	-15.4582	4e-18	1.09e-16	31.0336
ENPP1	-1.24928	4.63044	-12.7069	2.29e-15	3.2e-14	24.6119
IL1RL1	-1.24937	5.59942	-6.50647	1.08e-07	3.55e-07	6.78653
LONRF2	-1.25125	4.41718	-6.0173	5.09e-07	1.51e-06	5.23289
PDZD3	-1.25142	6.51979	-10.4597	8e-13	6.51e-12	18.6852
ATPIF1	-1.2515	9.00127	-14.7118	2.06e-17	4.67e-16	29.3758
DLG3-AS1	-1.25279	5.52367	-19.7949	8.19e-22	6.47e-20	39.603
USP2	-1.25289	5.41899	-9.90542	3.75e-12	2.68e-11	17.1233
KSR2	-1.25325	3.83699	-16.0764	1.07e-18	3.42e-17	32.3625
ACMSD	-1.2534	9.70971	-5.19503	6.93e-06	1.73e-05	2.63596
BTC	-1.25481	3.92666	-9.69026	6.9e-12	4.66e-11	16.5063
GLOD5	-1.25684	4.15259	-15.6421	2.69e-18	7.73e-17	31.4329
AASS	-1.25743	5.58183	-6.21915	2.68e-07	8.31e-07	5.87411
AHCY	-1.25762	9.51867	-9.77864	5.37e-12	3.71e-11	16.7605
F11	-1.25798	3.49098	-14.5617	2.89e-17	6.27e-16	29.0351
SLC25A48	-1.26004	5.80748	-11.8173	2.15e-14	2.4e-13	22.3428
ALDH1B1	-1.26071	5.97971	-7.74108	2.26e-09	9.77e-09	10.6666
SLC10A2	-1.26119	7.00196	-2.64568	0.0117323	0.017804	-4.54554
TBC1D13	-1.2612	7.6623	-12.8244	1.71e-15	2.45e-14	24.9043
ANKS4B	-1.26211	5.20502	-8.17528	5.98e-10	2.85e-09	12.0035
RAB17	-1.26219	8.07088	-7.9591	1.16e-09	5.27e-09	11.3401
RAPGEF3	-1.26347	6.31498	-10.3347	1.13e-12	8.92e-12	18.3365
PLEKHA5	-1.26459	7.24193	-7.08969	1.71e-08	6.42e-08	8.63092
SAMD5	-1.26591	5.62799	-5.8515	8.63e-07	2.47e-06	4.70661
SVOPL	-1.26684	3.36754	-9.11718	3.61e-11	2.14e-10	14.8349
FLJ37786	-1.26703	3.10128	-7.2245	1.12e-08	4.32e-08	9.05476
IDH2	-1.2674	8.34831	-9.73977	6e-12	4.1e-11	16.6488
DLGAP2	-1.26879	4.09069	-13.3214	5.14e-16	8.4e-15	26.1222
GBA3	-1.26893	10.1983	-5.32928	4.53e-06	1.16e-05	3.05684
GPR155	-1.2691	7.35391	-6.74067	5.13e-08	1.78e-07	7.52889
COL4A4	-1.26922	5.68663	-9.78552	5.26e-12	3.64e-11	16.7802
CHDH	-1.2693	6.45177	-9.68188	7.07e-12	4.76e-11	16.4822
LLGL2	-1.2704	6.38684	-15.4721	3.88e-18	1.06e-16	31.0639
CYB5R2	-1.27057	4.19829	-12.3221	5.96e-15	7.59e-14	23.6425
FLJ90680	-1.27107	4.37426	-21.1348	8.05e-23	8.42e-21	41.935
SUCLG2	-1.27217	9.59114	-13.9732	1.11e-16	2.15e-15	27.6751
LINC00924	-1.27303	5.78163	-4.93086	1.59e-05	3.79e-05	1.81362
LOC100506125	-1.27441	4.70312	-12.1796	8.53e-15	1.05e-13	23.279
WDFY3-AS2	-1.27459	7.06515	-7.8868	1.44e-09	6.45e-09	11.1173
REM2	-1.27495	4.14689	-17.3797	7.57e-20	3.4e-18	35.0404
ZNF684	-1.27649	5.36729	-11.4035	6.32e-14	6.46e-13	21.2531
APEH	-1.27747	6.46597	-20.8131	1.39e-22	1.35e-20	41.387
PALM	-1.27816	7.5034	-11.9352	1.59e-14	1.83e-13	22.6494
MYH10	-1.28005	7.85626	-5.14751	8.06e-06	2e-05	2.48742
UGT8	-1.28008	7.02177	-4.66721	3.63e-05	8.15e-05	1.00277
HS3ST3A1	-1.28242	3.9158	-5.90713	7.23e-07	2.1e-06	4.88311
ATP5G3	-1.28362	9.74137	-18.8877	4.24e-21	2.72e-19	37.9461
APOC3	-1.28505	4.61731	-11.5409	4.41e-14	4.64e-13	21.6174
PKLR	-1.28544	6.0559	-7.0523	1.92e-08	7.15e-08	8.51317
MRPL34	-1.28555	8.31033	-21.1189	8.27e-23	8.51e-21	41.9082
SLC43A1	-1.28604	5.93025	-10.9334	2.21e-13	2.02e-12	19.9884
TMED6	-1.28702	6.68715	-3.55959	0.00100439	0.00180408	-2.22904
GCAT	-1.28989	7.01856	-12.2902	6.46e-15	8.15e-14	23.5614
EPB41L4B	-1.291	4.15603	-20.3308	3.19e-22	2.79e-20	40.5515
KCNH6	-1.29343	4.15145	-13.3761	4.51e-16	7.52e-15	26.2544
COL9A3	-1.29388	4.94767	-10.006	2.82e-12	2.07e-11	17.4096
RNF180	-1.29438	5.26594	-8.38098	3.21e-10	1.6e-09	12.6302
SGK494	-1.2954	5.74744	-8.37686	3.25e-10	1.62e-09	12.6177
TBATA	-1.29616	4.45667	-24.5116	3.89e-25	8.56e-23	47.2784
IGFALS	-1.29855	5.45072	-13.9828	1.08e-16	2.11e-15	27.6975
SERPINA10	-1.29936	4.90823	-22.9064	4.51e-24	7.69e-22	44.8271
PHGDH	-1.3042	7.15521	-7.89757	1.39e-09	6.26e-09	11.1505
DUSP15	-1.30468	5.42681	-15.9572	1.38e-18	4.26e-17	32.1093
SLC6A20	-1.30471	4.31083	-7.46634	5.27e-09	2.14e-08	9.81198
LHX1	-1.30526	4.99644	-15.4731	3.87e-18	1.06e-16	31.0661
FCRLB	-1.30743	6.41263	-8.70012	1.24e-10	6.64e-10	13.5936
MT2A	-1.30805	11.8162	-4.78687	2.5e-05	5.77e-05	1.36938
TRHDE-AS1	-1.30935	5.9066	-6.88506	3.25e-08	1.17e-07	7.98555
LIN52	-1.30946	7.05826	-12.4083	4.8e-15	6.24e-14	23.8612
MBOAT2	-1.31267	6.81517	-16.1742	8.75e-19	2.86e-17	32.5691
CEACAM1	-1.313	6.40778	-10.8877	2.49e-13	2.25e-12	19.8641
GHR	-1.31541	8.01625	-5.04774	1.1e-05	2.68e-05	2.1764
G0S2	-1.31589	8.33267	-4.62108	4.18e-05	9.31e-05	0.862103
SLC6A18	-1.31679	6.32949	-4.05265	0.000236887	0.000470877	-0.83314
ACSM2B	-1.31741	7.51338	-4.43185	7.5e-05	0.000160693	0.289479
GRAMD1B	-1.31825	7.08929	-11.8765	1.85e-14	2.1e-13	22.4969
LOC100507564	-1.31883	4.28824	-16.5004	4.45e-19	1.59e-17	33.2516
KLHDC9	-1.32049	7.94995	-10.3736	1.01e-12	8.09e-12	18.4451
CPAMD8	-1.32089	5.43108	-8.16744	6.12e-10	2.91e-09	11.9795
RNF186	-1.32152	7.79993	-3.70406	0.000662396	0.00122536	-1.82872
RASD1	-1.32564	9.33744	-4.19067	0.000156391	0.000318884	-0.428806
PNPLA4	-1.32565	7.41737	-9.65723	7.59e-12	5.08e-11	16.4111
SMIM22	-1.32595	4.40398	-17.0018	1.61e-19	6.49e-18	34.2807
CYP3A7-CYP3AP1	-1.32781	7.19631	-5.83025	9.23e-07	2.64e-06	4.63922
FBXO21	-1.32809	8.15788	-12.3983	4.92e-15	6.39e-14	23.836
GCHFR	-1.32911	7.66823	-7.62289	3.25e-09	1.37e-08	10.2997
ALX1	-1.32967	4.33831	-8.65292	1.42e-10	7.55e-10	13.4518
HOXA2	-1.33864	4.3774	-10.9597	2.05e-13	1.9e-12	20.06
MECOM	-1.33922	5.48908	-9.79242	5.16e-12	3.58e-11	16.8
BEX2	-1.34164	8.69118	-3.60155	0.000890586	0.00161268	-2.11358
OCLN	-1.34167	6.37352	-6.00721	5.26e-07	1.56e-06	5.20083
ARSF	-1.34223	6.09174	-7.33001	8.06e-09	3.18e-08	9.38564
MUC13	-1.34431	4.85518	-7.03769	2.01e-08	7.46e-08	8.46715
CNTN1	-1.34759	3.81853	-8.04741	8.82e-10	4.09e-09	11.6117
PINLYP	-1.34949	5.94382	-16.3179	6.49e-19	2.19e-17	32.8711
PNMAL1	-1.34981	6.84395	-4.33796	0.0001	0.000210038	0.00818807
WIF1	-1.34991	3.71191	-5.62441	1.78e-06	4.86e-06	3.98729
CYP39A1	-1.3515	4.92854	-5.83543	9.08e-07	2.59e-06	4.65565
FOLR3	-1.35207	5.05573	-9.13986	3.38e-11	2.01e-10	14.9018
TRPM6	-1.3524	4.31145	-14.6431	2.4e-17	5.35e-16	29.22
ESPL1	-1.35257	6.4412	-7.60136	3.47e-09	1.45e-08	10.2328
C11orf54	-1.35551	9.59093	-7.82735	1.73e-09	7.65e-09	10.9337
GRHPR	-1.35678	9.57557	-10.2306	1.51e-12	1.16e-11	18.0443
FECH	-1.35681	7.14812	-12.2152	7.8e-15	9.64e-14	23.3699
PANK1	-1.3603	8.83721	-7.5604	3.94e-09	1.63e-08	10.1053
TCL6	-1.36109	4.56226	-13.5955	2.68e-16	4.7e-15	26.7812
SLC9A2	-1.36187	3.88838	-21.5856	3.79e-23	4.32e-21	42.6909
SLC27A4	-1.36281	6.42146	-17.8032	3.31e-20	1.64e-18	35.8765
GIPR	-1.36446	5.12713	-27.2693	7.91e-27	2.61e-24	51.1606
LINC01159	-1.3668	5.99782	-7.62034	3.27e-09	1.38e-08	10.2918
SEPHS2	-1.36766	10.7617	-11.2228	1.02e-13	1e-12	20.7704
NPY1R	-1.36777	8.0027	-4.25517	0.00012863	0.000265852	-0.23811
ACOT13	-1.36793	8.45505	-10.1077	2.12e-12	1.6e-11	17.6977
HAGH	-1.36855	8.90382	-12.4571	4.25e-15	5.59e-14	23.9849
ADARB2-AS1	-1.36918	5.69956	-22.7625	5.65e-24	8.91e-22	44.5998
LINC01314	-1.3701	5.02063	-17.033	1.51e-19	6.19e-18	34.3439
SDSL	-1.37183	7.05978	-9.92339	3.56e-12	2.56e-11	17.1745
PCYT2	-1.3753	5.99943	-17.84	3.08e-20	1.54e-18	35.9485
AIFM1	-1.3755	9.30119	-6.49711	1.11e-07	3.65e-07	6.75684
AKR1A1	-1.37796	10.991	-7.46336	5.32e-09	2.16e-08	9.80268
HGD	-1.37832	7.63351	-7.50525	4.67e-09	1.91e-08	9.93338
CPNE6	-1.37846	5.56475	-9.29573	2.15e-11	1.33e-10	15.36
HACL1	-1.37936	7.85524	-12.8562	1.58e-15	2.29e-14	24.9831
EYA4	-1.38011	3.96839	-9.38432	1.66e-11	1.05e-10	15.6191
CCDC51	-1.38187	7.4285	-16.8843	2.04e-19	8.07e-18	34.0415
MAGI2-AS3	-1.3824	5.283	-12.2679	6.83e-15	8.56e-14	23.5046
ACSM2A	-1.38314	9.69293	-4.57182	4.87e-05	0.000107394	0.712338
CDKN1C	-1.38413	8.03538	-5.00403	1.27e-05	3.05e-05	2.04053
TBC1D24	-1.39124	6.47256	-13.8686	1.41e-16	2.65e-15	27.4291
SLC25A34	-1.39233	6.37962	-9.93668	3.43e-12	2.47e-11	17.2124
TSPAN33	-1.39274	8.66996	-13.7522	1.85e-16	3.38e-15	27.1542
KDF1	-1.39354	4.89009	-16.7355	2.75e-19	1.04e-17	33.7371
TTC39B	-1.39381	5.78352	-11.009	1.8e-13	1.68e-12	20.1939
C1orf194	-1.3946	4.13895	-16.6276	3.43e-19	1.26e-17	33.515
AMT	-1.39515	8.11553	-11.5385	4.44e-14	4.66e-13	21.6111
IPO13	-1.39542	7.14077	-13.6608	2.3e-16	4.1e-15	26.9371
MTURN	-1.39609	5.92046	-9.98778	2.97e-12	2.17e-11	17.3578
SLC25A10	-1.39704	6.32735	-9.28763	2.2e-11	1.36e-10	15.3363
KCNK10	-1.39742	4.35914	-17.8707	2.9e-20	1.48e-18	36.0083
SLC34A3	-1.40069	6.19632	-12.2871	6.51e-15	8.2e-14	23.5536
DMGDH	-1.40092	6.93408	-8.09719	7.58e-10	3.55e-09	11.7644
RASSF8-AS1	-1.4011	5.97423	-12.6048	2.94e-15	4.01e-14	24.3565
NEDD4L	-1.40227	7.69152	-12.0047	1.33e-14	1.57e-13	22.829
LOC441179	-1.40277	4.06343	-8.10889	7.32e-10	3.44e-09	11.8003
PWAR6	-1.40287	7.61715	-5.92366	6.86e-07	2e-06	4.93557
HDHD3	-1.4049	7.77338	-8.38082	3.21e-10	1.6e-09	12.6298
VDR	-1.40543	6.28365	-9.38545	1.66e-11	1.05e-10	15.6224
ST6GALNAC2	-1.40613	6.45404	-11.1103	1.37e-13	1.31e-12	20.4677
ACTRT3	-1.40678	5.10274	-12.5164	3.66e-15	4.89e-14	24.1345
GSTZ1	-1.40847	6.92147	-14.227	6.17e-17	1.26e-15	28.2663
APOD	-1.41014	6.01052	-4.892	1.8e-05	4.24e-05	1.69344
LRRN2	-1.41046	4.09221	-33.1985	5.4e-30	4.81e-27	58.3607
IDNK	-1.41199	7.15346	-10.6969	4.18e-13	3.62e-12	19.3415
GAS2	-1.41571	6.31828	-4.84395	2.09e-05	4.88e-05	1.54513
CSDC2	-1.41644	6.401	-7.96126	1.15e-09	5.24e-09	11.3468
BSN	-1.41657	3.97675	-21.6207	3.58e-23	4.12e-21	42.749
TFAP2A	-1.42045	4.31054	-10.6418	4.86e-13	4.16e-12	19.1896
BCKDHB	-1.42086	6.5228	-17.4749	6.28e-20	2.89e-18	35.2299
GDPD3	-1.42262	6.59333	-8.60059	1.66e-10	8.72e-10	13.2943
FAM83B	-1.42445	3.44111	-19.2907	2.03e-21	1.4e-19	38.6902
C2orf15	-1.42553	3.77153	-22.791	5.4e-24	8.58e-22	44.645
LUM	-1.42569	6.6899	-3.66521	0.000741301	0.0013582	-1.93712
LIPH	-1.42584	4.19475	-16.0455	1.15e-18	3.62e-17	32.2969
DCAF12L1	-1.42806	4.55078	-3.71256	0.000646242	0.00119732	-1.80493
PON3	-1.42816	5.66478	-7.22025	1.14e-08	4.37e-08	9.04143
GLYCTK	-1.42829	6.54699	-13.9377	1.2e-16	2.3e-15	27.5917
LOC401068	-1.4307	4.48138	-11.569	4.1e-14	4.35e-13	21.6917
HOXB8	-1.43219	4.55439	-9.39212	1.62e-11	1.03e-10	15.6419
LEFTY1	-1.43248	4.388	-4.21483	0.000145366	0.000297917	-0.3575
CCDC160	-1.43299	3.76833	-9.27965	2.25e-11	1.39e-10	15.3129
PAPPA2	-1.43358	4.80405	-18.4752	9.16e-21	5.36e-19	37.1708
PROM2	-1.43436	5.57517	-14.6092	2.59e-17	5.7e-16	29.1432
SLC16A2	-1.43506	6.99572	-8.61027	1.61e-10	8.48e-10	13.3235
GABRB2	-1.43603	4.12628	-10.0681	2.37e-12	1.77e-11	17.5856
LOC284798	-1.43675	4.78239	-27.5168	5.67e-27	2e-24	51.4906
UCHL1	-1.43736	5.74447	-9.40944	1.55e-11	9.81e-11	15.6924
UCA1	-1.438	4.78329	-20.8713	1.26e-22	1.23e-20	41.4868
MARVELD3	-1.43826	5.93193	-11.5132	4.74e-14	4.94e-13	21.5442
SLC19A2	-1.43936	7.21654	-6.80229	4.22e-08	1.49e-07	7.7239
PTGER3	-1.43943	5.75305	-7.36846	7.15e-09	2.85e-08	9.50603
LINC00671	-1.44042	6.17175	-6.16575	3.17e-07	9.75e-07	5.70443
CAMKV	-1.44225	5.08784	-21.1258	8.17e-23	8.45e-21	41.9199
TMEM27	-1.44478	11.2582	-5.5748	2.08e-06	5.63e-06	3.83046
SLC23A3	-1.44536	7.28673	-5.44763	3.12e-06	8.19e-06	3.42922
CALML3	-1.44586	4.4071	-12.2146	7.81e-15	9.65e-14	23.3684
HOXD8	-1.44635	8.40583	-11.2476	9.53e-14	9.42e-13	20.837
RPS6KA6	-1.44755	3.9118	-18.1648	1.65e-20	9.01e-19	36.5778
COX7B	-1.44837	9.18382	-15.1673	7.53e-18	1.9e-16	30.3946
PLA2G4F	-1.44972	5.57479	-24.4288	4.4e-25	9.48e-23	47.1556
UGT2B28	-1.45021	10.6714	-5.96286	6.05e-07	1.78e-06	5.06001
CCDC64	-1.45119	6.93717	-15.1569	7.7e-18	1.94e-16	30.3716
LHPP	-1.45691	6.91311	-10.2326	1.5e-12	1.16e-11	18.05
WLS	-1.45774	8.40478	-6.88476	3.25e-08	1.17e-07	7.98461
NQO2	-1.45783	8.0826	-9.12716	3.51e-11	2.08e-10	14.8644
CA2	-1.45918	10.6418	-11.1377	1.28e-13	1.23e-12	20.5415
S100A14	-1.46002	5.73651	-15.7048	2.36e-18	6.84e-17	31.5684
STK33	-1.46062	4.68351	-8.96437	5.65e-11	3.22e-10	14.3825
CTSH	-1.46279	11.3096	-12.5526	3.35e-15	4.5e-14	24.2255
LOC101929243	-1.46317	6.34763	-15.3798	4.74e-18	1.27e-16	30.8622
MSRA	-1.46368	6.66287	-12.3114	6.12e-15	7.79e-14	23.6153
CUBN	-1.46518	10.3149	-4.49793	6.12e-05	0.000132963	0.488585
STEAP2	-1.46562	7.1814	-8.52398	2.09e-10	1.08e-09	13.0633
HIBCH	-1.46612	9.52552	-9.63523	8.08e-12	5.39e-11	16.3476
C6orf123	-1.46744	4.25679	-14.62	2.53e-17	5.59e-16	29.1677
SLC22A24	-1.46798	5.13643	-7.46534	5.29e-09	2.15e-08	9.80886
LINC00284	-1.46912	3.52458	-7.897	1.4e-09	6.27e-09	11.1488
SLC16A5	-1.47225	6.27177	-9.00691	4.99e-11	2.88e-10	14.5087
CADPS2	-1.47404	7.92833	-13.7184	2.01e-16	3.63e-15	27.0739
PARM1	-1.47491	7.85299	-6.03021	4.89e-07	1.46e-06	5.27387
PHACTR3	-1.4771	3.71903	-9.88338	3.99e-12	2.83e-11	17.0603
NR1I3	-1.48358	3.91017	-14.126	7.78e-17	1.55e-15	28.0319
GPD1	-1.48389	6.06189	-10.7236	3.89e-13	3.39e-12	19.4147
SEMA6D	-1.48709	5.36992	-11.0118	1.79e-13	1.66e-12	20.2014
CMTM4	-1.48774	7.60957	-15.875	1.64e-18	4.96e-17	31.9337
MTCH2	-1.48775	9.26409	-15.9486	1.41e-18	4.31e-17	32.0909
MRPS6	-1.48981	9.65905	-6.2905	2.13e-07	6.73e-07	6.10076
TGFBR3	-1.49447	8.75676	-10.4527	8.16e-13	6.63e-12	18.6656
BBOX1	-1.49572	11.0974	-4.76675	2.66e-05	6.11e-05	1.30758
CYP4F12	-1.49613	6.51785	-13.6267	2.49e-16	4.39e-15	26.8559
C2orf88	-1.49734	5.62703	-10.458	8.04e-13	6.54e-12	18.6805
RANBP3L	-1.49896	3.24097	-9.68296	7.05e-12	4.75e-11	16.4853
LOC101927720	-1.50027	4.76876	-12.8095	1.78e-15	2.54e-14	24.8672
[truncated: 653 more rows]

## Sheet: stage three
genesymbol	logFC	AveExpr	t	P.Value	adj.P.Val	B
TNFAIP6	6.4131	6.23065	21.9949	1.89067e-19	5.03018e-17	34.4772
NPTX2	5.61043	6.01141	9.27517	4.08541e-10	3.9609e-09	12.7609
ANGPTL4	5.42184	8.24905	28.3659	1.80345e-22	1.47782e-19	41.3343
KISS1R	5.36768	6.06814	8.17078	5.84509e-09	4.03717e-08	10.0606
NDUFA4L2	5.19848	8.60661	27.8914	2.87268e-22	1.99541e-19	40.8802
TMEM45A	5.06286	6.97379	9.33383	3.56288e-10	3.52265e-09	12.8999
HILPDA	4.63834	9.02921	16.8293	2.31661e-16	2.09991e-14	27.3464
CA9	4.54722	7.31957	33.5583	1.69797e-24	2.67573e-21	45.8343
CTHRC1	4.48087	7.19216	7.43109	3.79459e-08	2.08855e-07	8.16551
PLA2G7	4.42226	5.25794	15.7452	1.29722e-15	9.0084e-14	25.607
CP	4.41858	6.59262	6.4067	5.63134e-07	2.30313e-06	5.441
ADAMDEC1	4.39675	4.81984	11.1837	5.97638e-12	1.0806e-10	17.0533
ENO2	4.34802	7.25217	23.1572	4.68457e-20	1.5233e-17	35.8641
CCL18	4.22569	6.07433	11.1857	5.9504e-12	1.07827e-10	17.0577
LINC00887	4.1936	5.14456	13.1833	1.14079e-13	3.82492e-12	21.073
LOX	4.14317	6.64185	10.4745	2.72192e-11	3.88039e-10	15.5128
IGFBP3	4.13437	10.637	22.5027	1.01967e-19	2.91613e-17	35.0915
NETO2	4.12959	6.3751	19.9954	2.44923e-18	4.52027e-16	31.9194
LOC102659288	4.05528	4.89911	5.14164	1.78326e-05	5.19065e-05	1.9747
PRIMA1	3.99085	6.42985	9.81739	1.17323e-10	1.35103e-09	14.0283
EGLN3	3.98349	7.6398	20.6352	1.05398e-18	2.29699e-16	32.763
BCL2A1	3.90327	5.23018	13.0803	1.3839e-13	4.51441e-12	20.877
CDCA2	3.89043	5.73329	21.9502	1.99745e-19	5.24613e-17	34.4225
C3	3.849	10.5174	7.73707	1.73576e-08	1.05172e-07	8.95744
FABP7	3.82506	4.95766	6.89651	1.52857e-07	7.20861e-07	6.75667
ANGPT2	3.82285	6.35386	19.1719	7.51178e-18	1.19292e-15	30.7962
APOC1	3.76643	8.30092	14.7706	6.63327e-15	3.38033e-13	23.9562
TGFBI	3.67986	10.0409	7.28691	5.50738e-08	2.90859e-07	7.78859
INHBB	3.67253	7.38956	15.821	1.14659e-15	8.21299e-14	25.7317
SEMA5B	3.6404	8.16033	28.1622	2.20037e-22	1.60989e-19	41.1404
CAV1	3.57296	8.94045	15.4084	2.25896e-15	1.36915e-13	25.0462
CYP2J2	3.56061	7.63613	8.69907	1.60445e-09	1.29454e-08	11.3721
C5orf46	3.55469	5.72988	6.37904	6.06601e-07	2.45638e-06	5.36607
ENPP3	3.5348	8.25729	19.1372	7.88213e-18	1.21938e-15	30.7479
C1QB	3.52685	8.90148	11.1336	6.63846e-12	1.18052e-10	16.9465
COL23A1	3.50195	7.08242	9.48828	2.49041e-10	2.59373e-09	13.2637
LOC100132891	3.46473	5.68977	14.4914	1.07522e-14	4.87322e-13	23.4671
BIRC3	3.45671	7.54836	12.568	3.67873e-13	1.04236e-11	19.8848
KCNJ2	3.44864	6.66329	14.711	7.34955e-15	3.64559e-13	23.8524
C8orf22	3.43668	4.45276	6.69971	2.5737e-07	1.14569e-06	6.23063
APOLD1	3.43149	8.46731	10.267	4.29164e-11	5.69421e-10	15.0501
VCAN	3.4248	7.91858	6.35625	6.44954e-07	2.59527e-06	5.30431
PTHLH	3.41436	4.37947	6.27266	8.07903e-07	3.17519e-06	5.07743
CXCL13	3.36223	4.45516	8.45537	2.8997e-09	2.17514e-08	10.7716
MAP3K7CL	3.35238	5.601	9.7834	1.26724e-10	1.44226e-09	13.95
LINC00462	3.32638	5.02076	9.32516	3.63563e-10	3.58247e-09	12.8794
LPCAT1	3.32563	8.2787	15.6822	1.43809e-15	9.78759e-14	25.5028
LYZ	3.30229	8.97741	7.28987	5.46532e-08	2.88787e-07	7.79634
FCGR1B	3.29755	6.69821	8.70067	1.59826e-09	1.29109e-08	11.376
ST8SIA4	3.27463	4.72077	18.785	1.29015e-17	1.79796e-15	30.2532
EOMES	3.27075	5.88609	9.4165	2.94027e-10	2.99674e-09	13.095
GPR65	3.24983	6.06167	10.4207	3.06132e-11	4.26047e-10	15.3934
FGG	3.24383	5.4178	3.04777	0.00492662	0.00871336	-3.5298
FABP5	3.20693	7.58888	11.2737	4.95157e-12	9.28067e-11	17.2444
CTSS	3.19496	7.72307	11.6347	2.3521e-12	4.97267e-11	18.0006
DIRAS2	3.1743	4.29002	13.6421	4.88727e-14	1.85409e-12	21.9327
CXCL9	3.16667	7.33321	7.57036	2.65423e-08	1.51969e-07	8.52732
RGS1	3.1601	6.52001	12.1753	7.9354e-13	1.97767e-11	19.1042
CCL5	3.09865	7.47666	9.2435	4.39947e-10	4.20371e-09	12.6857
SPINK13	3.08399	4.76927	6.68276	2.69233e-07	1.19177e-06	6.18515
CRTAM	3.08096	4.39608	11.3678	4.07229e-12	7.88507e-11	17.443
LINC01094	3.07978	4.57517	11.6625	2.22232e-12	4.74728e-11	18.0583
GPR183	3.07631	6.6603	10.1788	5.21747e-11	6.70967e-10	14.8516
HTRA4	3.07328	4.53072	15.7852	1.21537e-15	8.52674e-14	25.6728
CSTA	3.07294	6.66089	8.58422	2.11854e-09	1.65524e-08	11.09
ADM	3.06791	10.4926	15.7017	1.39294e-15	9.57578e-14	25.535
CXCL10	3.06191	7.37498	8.91459	9.56857e-10	8.26399e-09	11.8968
TMEM91	3.05734	7.20201	16.8239	2.33627e-16	2.10841e-14	27.3379
GZMK	3.05228	6.89103	7.4582	3.53889e-08	1.95887e-07	8.23612
CXCR4	3.03375	8.68127	13.1763	1.15569e-13	3.86224e-12	21.0598
C1QC	3.01101	9.20656	10.9033	1.0802e-11	1.78747e-10	16.4519
SPAG4	3.0094	7.06697	20.0223	2.36279e-18	4.40038e-16	31.9554
GZMA	2.99831	6.56191	8.52788	2.42956e-09	1.86692e-08	10.951
NKG7	2.98208	6.09734	11.8469	1.52917e-12	3.48072e-11	18.438
IL10RA	2.97809	7.56772	11.0558	7.81982e-12	1.34732e-10	16.7801
ITK	2.96906	5.40727	10.9232	1.0355e-11	1.71767e-10	16.4948
PLK2	2.96251	7.997	9.46309	2.63964e-10	2.72833e-09	13.2046
PLOD2	2.95527	9.0974	10.1947	5.03665e-11	6.50573e-10	14.8875
CD2	2.93927	6.64961	8.67847	1.68625e-09	1.34834e-08	11.3216
CDH13	2.93117	6.1658	16.4413	4.24652e-16	3.43433e-14	26.7349
FPR3	2.92342	5.97264	14.1852	1.84121e-14	7.79318e-13	22.9222
C16orf54	2.9069	5.27203	9.00768	7.66847e-10	6.8066e-09	12.1215
SLFN13	2.90033	4.64454	16.546	3.60166e-16	3.03637e-14	26.9012
DDIT4	2.87901	10.0908	9.25798	4.25292e-10	4.09423e-09	12.7201
IDO1	2.87669	6.60214	11.9798	1.1708e-12	2.78572e-11	18.7092
P2RX7	2.8717	5.73299	16.4826	3.97888e-16	3.27355e-14	26.8006
TNFSF13B	2.87163	7.55624	8.9806	8.17765e-10	7.23035e-09	12.0562
NOL3	2.8672	7.66238	19.3939	5.53037e-18	8.99168e-16	31.1033
APOL1	2.86571	8.05985	8.09743	7.01446e-09	4.71605e-08	9.87565
ZNF395	2.85331	7.482	25.041	5.55445e-21	2.32221e-18	37.9735
PCDHB16	2.85088	5.35978	7.12556	8.38023e-08	4.2016e-07	7.36405
CD1D	2.83642	5.06207	11.5249	2.94457e-12	6.04121e-11	17.7724
CXCL11	2.83419	4.23519	7.16625	7.53631e-08	3.82909e-07	7.47137
PDK1	2.83326	6.20728	37.9667	5.38823e-26	1.83972e-22	49.0919
PPFIA4	2.83304	5.55924	17.2539	1.20931e-16	1.20262e-14	28.0018
LAMP3	2.82349	4.99621	12.6925	2.89303e-13	8.52515e-12	20.1286
APBB1IP	2.81673	6.4288	23.7078	2.47263e-20	8.73349e-18	36.4976
IGSF6	2.80669	4.63858	12.5863	3.5506e-13	1.01447e-11	19.9207
ABCA17P	2.76755	5.29097	9.55269	2.14694e-10	2.28068e-09	13.4144
LINC00240	2.76409	4.42443	12.5443	3.8519e-13	1.08244e-11	19.8381
AIM2	2.76386	5.17399	8.53992	2.35936e-09	1.82049e-08	10.9808
ENTPD1	2.76164	6.16584	17.0747	1.58867e-16	1.52796e-14	27.7268
ITGA4	2.76103	5.13537	14.2523	1.63524e-14	7.03773e-13	23.0424
VIM	2.7531	9.26058	13.8297	3.4772e-14	1.37252e-12	22.2778
C10orf99	2.7507	4.91297	4.32753	0.000167723	0.000401398	-0.249201
TLR3	2.74753	6.97597	18.5239	1.86862e-17	2.48575e-15	29.8811
GPNMB	2.74	7.83972	9.20975	4.76148e-10	4.50757e-09	12.6054
RASSF2	2.73988	6.90349	10.401	3.19627e-11	4.41232e-10	15.3495
RAD51AP1	2.72091	4.73414	17.3257	1.08497e-16	1.10263e-14	28.1111
TM6SF1	2.71462	5.97907	11.2747	4.94157e-12	9.27041e-11	17.2465
SERPINE1	2.71373	7.31575	6.00456	1.67047e-06	6.12919e-06	4.3466
IFI16	2.71206	8.32846	11.8586	1.49368e-12	3.41513e-11	18.4619
UHRF1	2.7106	5.4303	10.4983	2.58432e-11	3.71005e-10	15.5655
SLC6A3	2.71022	6.43968	5.77229	3.14797e-06	1.08531e-05	3.71019
IRX3	2.70935	9.89439	10.7069	1.64465e-11	2.54118e-10	16.0247
NFE2L3	2.70077	5.08117	12.2339	7.06727e-13	1.80075e-11	19.2219
NMU	2.69897	4.27491	5.91675	2.12174e-06	7.5963e-06	4.1063
HAPLN1	2.68615	4.57129	9.57894	2.02121e-10	2.16448e-09	13.4757
PPP1R3C	2.68348	6.43602	11.0501	7.91326e-12	1.35999e-10	16.7681
IKBIP	2.67672	6.13543	13.0567	1.44676e-13	4.69705e-12	20.8319
CCL4	2.67563	7.35894	7.90258	1.14254e-08	7.27576e-08	9.38114
ERV3-2	2.67179	7.5375	8.38772	3.42221e-09	2.51732e-08	10.6035
PCDHB14	2.66841	5.14441	9.61074	1.87899e-10	2.02382e-09	13.5498
PNCK	2.66694	6.59947	7.30326	5.27894e-08	2.79587e-07	7.83144
RNASET2	2.65293	6.92185	15.2897	2.75312e-15	1.63007e-13	24.8461
LY96	2.65291	7.23601	6.78878	2.03199e-07	9.25874e-07	6.46918
VEGFA	2.64783	9.78791	15.7946	1.19685e-15	8.45426e-14	25.6884
FAM49A	2.60969	5.11322	18.3355	2.44805e-17	3.09572e-15	29.6096
PYGL	2.60934	7.65461	14.6497	8.1689e-15	3.91916e-13	23.7454
SACS	2.60696	6.0407	11.9792	1.17235e-12	2.78616e-11	18.7079
TMEM255A	2.59772	4.91612	5.57891	5.34857e-06	1.75201e-05	3.17868
GBP5	2.59484	5.41334	9.82097	1.16376e-10	1.34088e-09	14.0365
CLEC5A	2.59363	4.40372	9.34368	3.48211e-10	3.46452e-09	12.9232
RRM2	2.58147	5.85172	9.02118	7.4269e-10	6.61511e-09	12.154
CD69	2.57816	6.07229	7.32417	5.00069e-08	2.66296e-07	7.88622
MS4A7	2.56631	7.9966	9.03358	7.21188e-10	6.44883e-09	12.1838
GAS6-AS1	2.56021	4.6222	22.3361	1.2468e-19	3.49891e-17	34.8916
RAB42	2.55282	7.11813	8.26216	4.66164e-09	3.28851e-08	10.29
ADA	2.54969	6.19107	11.4624	3.34893e-12	6.71951e-11	17.6417
OLR1	2.54863	5.9096	7.32736	4.95967e-08	2.64593e-07	7.89456
CD86	2.54505	5.65498	12.7769	2.4609e-13	7.38203e-12	20.2928
C1QA	2.54044	9.02506	8.47581	2.75848e-09	2.08679e-08	10.8222
CLEC2B	2.53496	6.50187	10.6722	1.77229e-11	2.71104e-10	15.9488
APOBEC3C	2.53362	6.73456	27.8741	2.92211e-22	1.99541e-19	40.8636
PYCARD	2.53252	7.3813	9.3035	3.82393e-10	3.74281e-09	12.8281
PF4V1	2.52342	3.9113	6.03864	1.52268e-06	5.62829e-06	4.43973
AHNAK2	2.5231	5.37277	12.4213	4.89303e-13	1.31547e-11	19.5952
TLR7	2.52108	5.6201	11.7701	1.78608e-12	3.96851e-11	18.2803
MIR210HG	2.5192	6.00777	19.0715	8.6351e-18	1.31036e-15	30.6563
LAPTM5	2.50668	9.35951	9.85267	1.08318e-10	1.25652e-09	14.1094
FCER1G	2.50391	7.90825	9.15844	5.37126e-10	4.98345e-09	12.4831
LY86	2.49482	7.31797	10.6003	2.07052e-11	3.1e-10	15.7907
CST7	2.48395	6.64091	8.86327	1.08159e-09	9.17686e-09	11.7724
CD3D	2.47387	6.89578	9.45443	2.69308e-10	2.77517e-09	13.1842
MICB	2.47209	5.88636	12.14	8.50998e-13	2.10296e-11	19.0332
GAL3ST1	2.46894	8.3999	8.95335	8.72482e-10	7.62854e-09	11.9905
CCR5	2.46778	7.40818	10.0147	7.5216e-11	9.19925e-10	14.48
BTN3A2	2.46687	7.88248	11.9012	1.37085e-12	3.18044e-11	18.549
CCR6	2.45732	4.40543	8.8594	1.09163e-09	9.24859e-09	11.763
TYROBP	2.45578	9.10946	10.2741	4.22463e-11	5.6235e-10	15.0661
GJA1	2.45268	9.8915	10.4806	2.68557e-11	3.83391e-10	15.5264
HLA-DMA	2.45039	9.20084	9.04759	6.97668e-10	6.26311e-09	12.2175
ESM1	2.44647	6.74804	10.1182	5.9699e-11	7.53075e-10	14.7147
LINC01127	2.43531	5.16929	3.73714	0.000827022	0.00171934	-1.81266
GBP2	2.43509	7.4502	7.62937	2.28284e-08	1.33161e-07	8.67995
CD300LF	2.43304	5.95209	10.5758	2.18358e-11	3.22747e-10	15.7367
CASP1	2.42839	7.45243	10.2727	4.2385e-11	5.63465e-10	15.0628
LILRB2	2.42509	5.76161	11.3836	3.94068e-12	7.71785e-11	17.4764
PRELID2	2.42503	5.83471	14.6331	8.40716e-15	3.96779e-13	23.7163
TLR8	2.42092	5.07792	11.4702	3.29535e-12	6.63148e-11	17.6581
COL21A1	2.42066	5.84961	7.71973	1.81386e-08	1.09128e-07	8.91286
MTCP1	2.41759	4.72936	13.2564	9.95238e-14	3.39242e-12	21.2114
TRBC1	2.41412	7.58985	7.34382	4.75295e-08	2.55067e-07	7.93763
PAG1	2.40367	6.50562	16.1776	6.45289e-16	4.93261e-14	26.3125
MCAM	2.40332	8.19533	11.359	4.14706e-12	8.00722e-11	17.4245
PSMB9	2.40184	8.48563	10.5858	2.13677e-11	3.17202e-10	15.7587
HLA-DPA1	2.39861	9.97903	6.24947	8.60083e-07	3.35421e-06	5.01442
LOC101927972	2.39506	4.02132	9.34036	3.50914e-10	3.48465e-09	12.9154
RGS18	2.39341	5.50701	7.84566	1.31873e-08	8.24901e-08	9.23582
LIPA	2.38959	10.5834	20.7389	9.21319e-19	2.09713e-16	32.8974
DUSP4	2.38468	5.40642	12.9554	1.7518e-13	5.54674e-12	20.6378
THEMIS2	2.3837	6.79785	9.10574	6.08102e-10	5.56142e-09	12.357
LGALS1	2.37892	10.6564	9.91219	9.47015e-11	1.11819e-09	14.2459
SLFN11	2.36276	6.49027	11.0976	7.15948e-12	1.25358e-10	16.8698
DPY19L2P2	2.36062	5.44037	8.89679	9.98351e-10	8.58255e-09	11.8537
DDB2	2.35878	7.4643	17.1379	1.4426e-16	1.40062e-14	27.824
GAS2L3	2.35668	7.7249	9.7182	1.46979e-10	1.63465e-09	13.7993
RAB37	2.34816	4.83339	19.2182	7.04532e-18	1.12758e-15	30.8605
HCLS1	2.34795	8.12739	9.42028	2.91466e-10	2.97507e-09	13.1039
DTL	2.3396	4.3657	12.1695	8.02662e-13	1.99313e-11	19.0926
OLFML2B	2.33724	6.67186	7.57626	2.61445e-08	1.50195e-07	8.54261
GLIPR1	2.33578	6.64202	7.69023	1.95505e-08	1.16124e-07	8.83693
CLIC2	2.33108	6.25976	12.2117	7.38334e-13	1.85549e-11	19.1774
PCDHGA8	2.33102	6.02458	23.0429	5.35814e-20	1.68872e-17	35.7308
STC2	2.32222	6.62408	10.5486	2.31608e-11	3.38909e-10	15.6768
TNFAIP3	2.32212	7.98964	11.7919	1.70874e-12	3.82154e-11	18.3252
NEFL	2.31039	5.8743	3.81965	0.000663574	0.00140637	-1.59818
LCK	2.30511	6.07363	9.24371	4.39726e-10	4.20356e-09	12.6862
CENPK	2.30403	4.06251	13.2314	1.04265e-13	3.53639e-12	21.1642
PRKCDBP	2.3037	7.01694	15.3602	2.44775e-15	1.46622e-13	24.965
TFPI2	2.2984	6.87489	3.34413	0.00231913	0.00440762	-2.81
CSPG4	2.29414	5.3231	11.9476	1.2488e-12	2.94733e-11	18.6437
RCN1	2.29319	8.62217	10.3019	3.97377e-11	5.3207e-10	15.1283
CAV2	2.2927	7.53744	18.2804	2.65031e-17	3.31062e-15	29.5298
NLRC5	2.28929	6.98323	12.3404	5.73182e-13	1.50928e-11	19.4345
RAC2	2.28548	6.93975	10.7549	1.48358e-11	2.3343e-10	16.1294
TBXAS1	2.28218	5.37765	14.9816	4.62626e-15	2.50062e-13	24.321
SIGLEC10	2.28025	5.74224	15.1058	3.74892e-15	2.08696e-13	24.5338
P2RY8	2.26681	6.62885	10.3535	3.54688e-11	4.828e-10	15.2438
HLA-DRA	2.26634	11.5861	8.32508	3.99177e-09	2.86831e-08	10.4473
CCL20	2.26596	6.3855	4.02603	0.000380864	0.00084827	-1.05543
PCDH17	2.2647	7.03926	8.53152	2.4081e-09	1.85251e-08	10.96
UBASH3A	2.26389	4.33736	14.6215	8.57671e-15	4.02988e-13	23.6961
MNDA	2.25546	7.35382	8.10805	6.83148e-09	4.61122e-08	9.90245
CCL28	2.25314	5.69718	7.15168	7.828e-08	3.96255e-07	7.43298
SAMHD1	2.25227	7.05688	11.0689	7.60661e-12	1.31612e-10	16.8082
BIRC7	2.24575	6.37529	6.13393	1.17568e-06	4.4635e-06	4.69983
KLHL6	2.24352	4.59992	13.9199	2.95573e-14	1.17804e-12	22.4425
HLA-DPB1	2.24188	8.04629	9.6129	1.8697e-10	2.01806e-09	13.5549
HLA-DMB	2.24169	9.46034	9.96857	8.34186e-11	1.00643e-09	14.3748
CORO1A	2.24095	7.02998	9.40011	3.05417e-10	3.09621e-09	13.0564
SRGN	2.24077	8.82877	12.0745	9.69154e-13	2.36358e-11	18.9012
CD27	2.23073	6.14768	8.38853	3.41538e-09	2.5132e-08	10.6055
ADORA3	2.22715	5.32743	9.45714	2.67621e-10	2.75917e-09	13.1906
CCND1	2.22679	8.44198	9.3815	3.18905e-10	3.21668e-09	13.0125
CD70	2.22106	7.28792	7.94117	1.0369e-08	6.66729e-08	9.47946
IFI27	2.2162	8.78466	8.02325	8.44126e-09	5.54255e-08	9.68795
IGJ	2.21205	7.31357	3.31934	0.0024722	0.00466692	-2.87139
IL20RB	2.21016	5.32619	3.52078	0.00146472	0.0028958	-2.36706
GJC1	2.20215	4.97531	14.1318	2.02432e-14	8.49799e-13	22.8262
TREM2	2.19466	7.30624	12.0729	9.72356e-13	2.36857e-11	18.8978
CD247	2.19413	5.94389	9.99219	7.91113e-11	9.62967e-10	14.4287
TNFSF9	2.19369	4.68614	8.87632	1.04835e-09	8.94857e-09	11.8041
PSMB8	2.19326	8.81226	12.1737	7.96042e-13	1.98138e-11	19.101
TLR2	2.19059	7.88706	9.09449	6.24465e-10	5.69328e-09	12.3301
TRIM59	2.18665	4.72671	10.1101	6.07797e-11	7.65293e-10	14.6965
ANLN	2.18579	4.13259	6.71316	2.48334e-07	1.10932e-06	6.2667
HLA-DQB1	2.18444	6.39644	4.64183	7.07848e-05	0.00018254	0.603653
E2F8	2.18353	3.67897	7.13083	8.26577e-08	4.15234e-07	7.37796
TRAC	2.18129	7.15181	8.53747	2.37347e-09	1.8293e-08	10.9747
RNASE6	2.18074	7.91905	8.98483	8.09591e-10	7.16117e-09	12.0664
LHFPL2	2.17818	7.21686	8.50767	2.55213e-09	1.9494e-08	10.9011
RNASE2	2.17619	5.1826	7.43836	3.72428e-08	2.05206e-07	8.18444
ITGB2	2.1759	7.03316	11.7491	1.86359e-12	4.08315e-11	18.2371
CD300A	2.17547	5.29075	20.6703	1.00694e-18	2.21809e-16	32.8086
CD163	2.175	7.28958	5.89372	2.25924e-06	8.0506e-06	4.04322
LAX1	2.17456	4.80305	10.6039	2.05457e-11	3.08517e-10	15.7986
HLA-DPB2	2.17422	3.7023	7.72834	1.77464e-08	1.07148e-07	8.935
TUBB6	2.17386	8.17944	10.3339	3.70312e-11	5.02399e-10	15.2
ALDOC	2.17344	7.59954	13.393	7.72336e-14	2.76047e-12	21.4686
HLA-DQA1	2.17195	6.75959	2.43104	0.0215731	0.0333871	-4.90831
QRFPR	2.1676	3.68569	7.21671	6.60844e-08	3.40494e-07	7.60424
IL2RG	2.16447	6.24092	9.17166	5.2068e-10	4.86173e-09	12.5146
DUXAP10	2.16374	3.97961	5.16799	1.65822e-05	4.85914e-05	2.04723
SLAMF7	2.16217	5.13576	9.23384	4.50011e-10	4.29386e-09	12.6628
SLAMF8	2.15942	5.88766	9.43532	2.81482e-10	2.88322e-09	13.1393
SLC43A3	2.15887	6.59016	11.7801	1.74996e-12	3.90095e-11	18.301
SLC16A6	2.15764	5.02113	13.1788	1.15033e-13	3.8506e-12	21.0645
BTN3A3	2.15708	7.36782	10.4734	2.72804e-11	3.88641e-10	15.5105
DCLK1	2.15605	4.79745	7.66731	2.07247e-08	1.22037e-07	8.77786
KCNK3	2.14796	6.14637	8.36256	3.64026e-09	2.65751e-08	10.5408
SCG2	2.14465	4.11268	4.30382	0.000178949	0.000426025	-0.313066
C1S	2.14346	8.42493	4.3411	0.00016161	0.00038772	-0.212593
GIMAP2	2.13369	7.38521	9.37214	3.25913e-10	3.27126e-09	12.9904
IFI44L	2.13267	7.67205	7.62341	2.31781e-08	1.34932e-07	8.66456
NLRC3	2.13193	5.3936	7.86034	1.27081e-08	7.98829e-08	9.27332
TLR1	2.12587	6.16786	7.53179	2.92973e-08	1.66072e-07	8.42734
SCG5	2.12403	4.38235	4.62153	7.48521e-05	0.000191893	0.548288
ALOX5	2.12016	6.01148	10.258	4.37823e-11	5.78661e-10	15.0298
PGF	2.11932	8.27674	9.01296	7.57303e-10	6.72801e-09	12.1342
NOD2	2.11866	5.06327	11.01	8.61405e-12	1.46223e-10	16.6818
NCKAP1L	2.11449	6.36936	11.7543	1.84398e-12	4.04885e-11	18.2479
RTP4	2.11331	6.89903	7.58587	2.55105e-08	1.47006e-07	8.56747
GAPT	2.11132	4.29087	9.72867	1.43518e-10	1.60311e-09	13.8236
C1orf162	2.10839	7.66081	7.90295	1.14148e-08	7.27125e-08	9.38209
HMCN1	2.10363	6.03438	10.207	4.90035e-11	6.36176e-10	14.9153
MYC	2.10077	9.03179	7.20969	6.73035e-08	3.45993e-07	7.58575
CENPH	2.09823	4.58686	12.8529	2.12832e-13	6.53684e-12	20.4402
PCDHGA4	2.09694	5.78344	6.20721	9.64133e-07	3.72876e-06	4.89946
PYHIN1	2.09644	4.08807	10.038	7.1391e-11	8.78916e-10	14.533
MLKL	2.09497	6.99066	18.0562	3.6696e-17	4.29574e-15	29.2025
HLA-F	2.09385	9.62268	13.3416	8.49399e-14	2.9847e-12	21.3722
FLT1	2.09364	6.76675	18.1926	3.00918e-17	3.6477e-15	29.4021
TOX2	2.09078	4.92108	7.2288	6.40406e-08	3.31268e-07	7.63601
PCDHB15	2.0907	4.59816	6.41562	5.49808e-07	2.25357e-06	5.46513
CD97	2.0858	7.73646	9.77525	1.29091e-10	1.4627e-09	13.9312
BHLHE41	2.08516	5.11846	17.7904	5.41999e-17	6.00183e-15	28.8101
HLA-G	2.08422	10.7314	13.1552	1.20244e-13	3.9924e-12	21.0196
CD52	2.08311	6.9791	7.84187	1.33142e-08	8.31567e-08	9.22612
VAV1	2.07661	5.67509	11.2359	5.35828e-12	9.88027e-11	17.1642
HS3ST2	2.07646	5.43461	6.99088	1.19242e-07	5.75996e-07	7.00757
TNFAIP8L2	2.07533	5.39876	14.0549	2.32121e-14	9.58718e-13	22.6875
ADORA2B	2.07442	4.59097	7.91494	1.10756e-08	7.06837e-08	9.41266
MIR34A	2.07317	6.07405	18.4493	2.07886e-17	2.67861e-15	29.7739
HIST1H2BK	2.07197	8.59099	7.70654	1.87565e-08	1.12189e-07	8.87893
PROCR	2.07082	7.00484	9.22744	4.56803e-10	4.34855e-09	12.6475
FAP	2.0705	4.98858	6.2533	8.51235e-07	3.3254e-06	5.02483
PTGS1	2.06709	6.31667	9.10792	6.04982e-10	5.53752e-09	12.3622
TRIM22	2.06549	9.28005	9.81405	1.18213e-10	1.35899e-09	14.0206
CHIT1	2.06445	4.56886	8.84164	1.13901e-09	9.58663e-09	11.7199
PNMA2	2.06363	6.26294	14.0856	2.19778e-14	9.1698e-13	22.7428
LRP4	2.06357	5.50792	10.7469	1.5091e-11	2.369e-10	16.1121
SLC15A3	2.06218	7.03942	11.7101	2.01729e-12	4.36851e-11	18.1566
CSF2RA	2.06218	5.21243	13.0703	1.41019e-13	4.59288e-12	20.8579
CLEC4A	2.05913	5.60743	9.79837	1.22491e-10	1.40109e-09	13.9845
CSF2RB	2.05523	6.58639	7.8346	1.35609e-08	8.44556e-08	9.20751
TRG-AS1	2.05365	5.10432	11.0827	7.3882e-12	1.28484e-10	16.8378
LCP1	2.05318	7.80068	11.1254	6.75281e-12	1.19463e-10	16.9292
TIMP1	2.05168	10.7857	6.27187	8.09622e-07	3.18043e-06	5.07529
IL7R	2.04926	6.97284	5.98893	1.74306e-06	6.3708e-06	4.30384
SAMSN1	2.04297	5.21731	9.77801	1.28285e-10	1.45495e-09	13.9376
EVI2A	2.04099	7.02782	7.09378	9.10574e-08	4.52987e-07	7.28012
HCAR3	2.03878	4.42965	4.13245	0.000285442	0.000652048	-0.772484
ITGAL	2.03642	5.89301	9.49151	2.47194e-10	2.57842e-09	13.2712
TOP2A	2.0301	4.06439	10.6239	1.96728e-11	2.97453e-10	15.8427
SCARB1	2.02952	5.5653	13.4974	6.37094e-14	2.33898e-12	21.6639
C10orf10	2.02932	8.31246	9.78617	1.2593e-10	1.43641e-09	13.9564
IL7	2.02818	6.16647	7.67292	2.04309e-08	1.20723e-07	8.79232
RPL39L	2.02777	4.79996	12.8155	2.28597e-13	6.92757e-12	20.3677
CPE	2.02168	8.5526	4.4654	0.000114965	0.000284442	0.123633
FXYD5	2.0212	7.75246	11.1413	6.53085e-12	1.1634e-10	16.9631
CHSY3	2.0205	4.52781	10.4054	3.16548e-11	4.37866e-10	15.3594
PCED1B	2.01925	6.02962	9.74258	1.39043e-10	1.55994e-09	13.8557
IRF2	2.01813	6.62749	15.6923	1.41439e-15	9.65843e-14	25.5196
C4orf47	2.01664	6.4306	11.9553	1.22967e-12	2.90554e-11	18.6594
TEX11	2.01599	4.69883	5.16812	1.6576e-05	4.85804e-05	2.0476
FAM26F	2.01544	5.43407	8.71949	1.52735e-09	1.24065e-08	11.4221
TYMP	2.00926	6.49649	10.2095	4.87318e-11	6.34257e-10	14.921
PBK	2.00919	4.29056	6.9147	1.457e-07	6.90448e-07	6.80511
FUT11	2.0082	6.82912	18.8124	1.24125e-17	1.75367e-15	30.292
EZH2	2.00544	5.20631	10.8035	1.33663e-11	2.13757e-10	16.2354
GPR18	2.00416	4.20757	7.61667	2.35804e-08	1.36885e-07	8.64713
CFD	1.99868	7.45076	7.76741	1.60727e-08	9.83176e-08	9.03535
LOC154761	1.99819	6.48524	12.8545	2.12194e-13	6.52704e-12	20.4432
ANGPTL2	1.99494	6.20278	10.7599	1.46755e-11	2.31086e-10	16.1405
2016-03-01	1.99488	4.9446	9.23796	4.45687e-10	4.25459e-09	12.6726
TAP1	1.99459	8.35832	11.1063	7.02986e-12	1.23405e-10	16.8883
VWF	1.99427	7.41664	9.14294	5.57065e-10	5.14983e-09	12.446
CCR7	1.99161	4.69189	7.87726	1.21776e-08	7.69018e-08	9.31654
MTCL1	1.98661	7.66841	8.0004	8.93795e-09	5.84433e-08	9.62999
FAM57A	1.97975	6.48592	11.5516	2.7875e-12	5.78569e-11	17.8281
SLA	1.97676	7.50691	8.552	2.29105e-09	1.77446e-08	11.0106
GNGT1	1.97675	3.82074	8.21022	5.30067e-09	3.69478e-08	10.1597
MMP1	1.97416	4.55444	3.52034	0.00146642	0.00289865	-2.36818
RASD2	1.97375	5.20405	12.7468	2.60709e-13	7.77422e-12	20.2343
LINC01426	1.97301	3.4974	6.35406	6.48761e-07	2.60803e-06	5.29838
GNB4	1.97267	6.56454	15.0284	4.27353e-15	2.35343e-13	24.4012
HAVCR1	1.97153	5.77183	3.31942	0.00247168	0.00466637	-2.87118
LDLRAD3	1.97042	6.40129	10.3858	3.30414e-11	4.53677e-10	15.3158
MSR1	1.96835	4.92592	9.96798	8.35293e-11	1.00717e-09	14.3735
CLEC2D	1.96356	4.14342	15.6927	1.41351e-15	9.65843e-14	25.5202
HK1	1.96207	8.64437	14.5312	1.00312e-14	4.61798e-13	23.5374
FLJ32255	1.96014	4.67795	13.3519	8.33405e-14	2.93353e-12	21.3915
HSPA6	1.95889	6.4677	9.89788	9.78061e-11	1.1502e-09	14.2132
THEMIS	1.95751	3.90438	6.63064	3.09302e-07	1.34894e-06	6.04516
BTN3A1	1.95452	7.23784	14.3022	1.4975e-14	6.49952e-13	23.1316
GZMB	1.94855	5.58646	7.7917	1.51138e-08	9.3007e-08	9.09767
RNF125	1.9476	5.57402	11.2792	4.89475e-12	9.22029e-11	17.2561
KCNK6	1.94658	4.84927	14.2018	1.78798e-14	7.61151e-13	22.952
GBP1	1.94439	7.63233	7.57097	2.65008e-08	1.51774e-07	8.5289
RHOH	1.94408	5.22295	8.63317	1.88145e-09	1.48861e-08	11.2105
MMP9	1.94171	5.9491	7.07483	9.56848e-08	4.72451e-07	7.23001
ELMO1	1.94154	5.66729	13.472	6.6751e-14	2.42888e-12	21.6166
CD8A	1.94096	6.80325	5.46953	7.22425e-06	2.29202e-05	2.87765
MARCKS	1.93902	8.23633	9.97457	8.23027e-11	9.95309e-10	14.3885
EMR2	1.93868	4.80027	15.4797	2.00699e-15	1.283e-13	25.1658
PTPRC	1.93857	5.84548	9.90809	9.55793e-11	1.12725e-09	14.2366
GPR171	1.93659	5.06651	6.9639	1.28002e-07	6.13823e-07	6.93594
PRC1	1.93558	5.44161	8.18137	5.69355e-09	3.94314e-08	10.0872
IGLL5	1.93479	6.65204	4.7481	5.28198e-05	0.000139658	0.89404
LOC101928152	1.93125	5.2427	6.46748	4.7839e-07	1.99389e-06	5.60537
GPR34	1.9298	7.39209	5.9087	2.16882e-06	7.75129e-06	4.08425
PLVAP	1.92732	8.95136	7.26447	5.83751e-08	3.0632e-07	7.7297
S100A10	1.92646	9.18109	9.83508	1.12717e-10	1.30238e-09	14.069
P2RY12	1.9252	3.96507	7.53624	2.89653e-08	1.64417e-07	8.43888
CRNDE	1.9222	7.54199	9.87036	1.04074e-10	1.21071e-09	14.15
MS4A6A	1.9205	7.34256	8.48469	2.69928e-09	2.04578e-08	10.8442
PIK3CG	1.92048	4.66172	12.9861	1.65287e-13	5.25788e-12	20.6968
CENPE	1.92013	3.94161	12.5486	3.81988e-13	1.0764e-11	19.8465
CXCL3	1.9196	4.82063	6.2044	9.71493e-07	3.7558e-06	4.8918
PLAUR	1.91797	6.51696	8.00794	8.77078e-09	5.74419e-08	9.64913
CD36	1.91642	5.63761	7.22477	6.47153e-08	3.33944e-07	7.62541
HIGD1B	1.91578	5.96844	8.68748	1.64993e-09	1.32499e-08	11.3437
HEY1	1.90963	7.32077	11.7959	1.69511e-12	3.7952e-11	18.3334
LCP2	1.90961	5.16007	13.6852	4.51882e-14	1.7271e-12	22.0122
PRAME	1.90862	5.56441	4.2236	0.000222745	0.000520314	-0.528661
LOC101929705	1.90807	4.58853	18.0764	3.56313e-17	4.19507e-15	29.2321
ELTD1	1.90693	8.20499	8.8973	9.97137e-10	8.57572e-09	11.8549
CD38	1.90402	5.22914	8.56952	2.19552e-09	1.71082e-08	11.0538
LOC101928173	1.90085	4.54215	14.3928	1.27737e-14	5.71358e-13	23.2926
SOX11	1.90081	4.20681	7.25531	5.97793e-08	3.12487e-07	7.70566
CDCA7L	1.89849	6.52777	6.50568	4.31852e-07	1.81624e-06	5.70854
ABCG1	1.89821	6.40591	13.8532	3.3327e-14	1.31802e-12	22.3209
SASH3	1.89742	6.15134	8.32879	3.95541e-09	2.84717e-08	10.4566
CKAP2L	1.89691	4.20078	31.8949	6.99332e-24	8.91458e-21	44.4794
RSAD2	1.89648	5.48051	9.18475	5.04918e-10	4.7492e-09	12.5458
C1R	1.89044	9.10108	3.75249	0.00079389	0.00165483	-1.77287
VCAM1	1.88718	11.2202	7.87476	1.22543e-08	7.73627e-08	9.31017
SCN4B	1.88705	5.3221	5.66898	4.17737e-06	1.40176e-05	3.42639
MYOF	1.88444	8.11271	10.6246	1.96435e-11	2.97426e-10	15.8442
KIAA0226L	1.88313	5.19589	7.09617	9.04911e-08	4.50366e-07	7.28642
MPEG1	1.88307	7.80738	7.70688	1.87404e-08	1.12125e-07	8.8798
CD300C	1.88307	4.9036	20.0956	2.14305e-18	4.06661e-16	32.0531
VSIG4	1.8789	8.16364	4.97521	2.8229e-05	7.8927e-05	1.51693
ISG20	1.87673	6.51423	10.8848	1.12371e-11	1.84016e-10	16.4117
MCTP1	1.87668	4.6788	11.2066	5.69601e-12	1.04e-10	17.1021
DOCK10	1.87338	5.05518	12.6908	2.90256e-13	8.5311e-12	20.1253
CCDC109B	1.87161	6.37417	6.99003	1.1951e-07	5.77015e-07	7.0053
TNFAIP8	1.87151	6.90719	9.44164	2.77395e-10	2.84848e-09	13.1542
EMP3	1.87052	8.11523	11.2706	4.98357e-12	9.3151e-11	17.2379
HCP5	1.86935	6.88013	8.32277	4.01452e-09	2.88263e-08	10.4416
FOXJ3	1.86593	6.78483	6.54638	3.87301e-07	1.64885e-06	5.81833
LOC100288152	1.86574	7.36316	3.93592	0.000485699	0.00105964	-1.29346
LOC100507535	1.86536	5.78063	14.4582	1.13929e-14	5.12955e-13	23.4085
PLAC8	1.86254	5.79408	6.53519	3.99066e-07	1.69337e-06	5.78816
TRIM9	1.85842	4.34809	8.33156	3.9286e-09	2.82987e-08	10.4635
PGBD5	1.85661	6.16096	7.11424	8.63175e-08	4.31412e-07	7.33416
GGTA1P	1.85647	7.79972	8.48232	2.71495e-09	2.05614e-08	10.8384
ARL4C	1.85586	6.94083	6.54001	3.93951e-07	1.67507e-06	5.80116
HLA-B	1.85483	12.3228	13.2886	9.37232e-14	3.22519e-12	21.2724
KIF20A	1.84933	4.28344	7.61617	2.36104e-08	1.37021e-07	8.64584
STC1	1.84762	7.82612	6.70299	2.55134e-07	1.13698e-06	6.23943
TRIB3	1.84711	6.38711	7.18586	7.16097e-08	3.65336e-07	7.52303
CCDC102B	1.84607	5.42091	8.49141	2.6554e-09	2.01702e-08	10.8609
ENKUR	1.84474	3.82358	7.09153	9.15948e-08	4.5544e-07	7.27417
EVI2B	1.84455	7.28289	6.71322	2.48292e-07	1.10932e-06	6.26687
HCK	1.84008	6.80816	8.11432	6.72555e-09	4.54568e-08	9.9183
GPR4	1.83773	6.18863	13.3148	8.92672e-14	3.08907e-12	21.3218
ANXA4	1.83746	11.6201	12.8111	2.30501e-13	6.96466e-12	20.3593
EHD2	1.83695	7.61768	17.5569	7.66701e-17	8.13815e-15	28.4609
GNLY	1.83637	4.9949	11.0216	8.40537e-12	1.43255e-10	16.7068
TMSB10	1.83444	12.5239	11.2026	5.74367e-12	1.04684e-10	17.0936
RARRES2	1.83386	9.76182	5.2466	1.33496e-05	3.98776e-05	2.2637
KIAA0101	1.83297	5.77352	9.98468	8.04569e-11	9.77604e-10	14.4115
RHBDF2	1.83092	6.74271	13.0125	1.57254e-13	5.04939e-12	20.7473
TCIRG1	1.82879	7.08758	10.1109	6.06674e-11	7.6435e-10	14.6984
KNTC1	1.82729	5.55883	11.0792	7.4422e-12	1.29204e-10	16.8304
CD14	1.82677	9.20265	6.56838	3.65189e-07	1.56315e-06	5.87762
LOC221272	1.82593	4.68809	14.6469	8.20843e-15	3.91977e-13	23.7405
SLC17A4	1.82403	4.70286	5.21304	1.46444e-05	4.33784e-05	2.17127
SLC2A3	1.82174	7.44287	5.44725	7.68097e-06	2.41932e-05	2.81629
CXCL8	1.82172	5.75218	3.62381	0.00111693	0.0022626	-2.10457
TIMD4	1.82003	4.49424	7.35613	4.60402e-08	2.47879e-07	7.96984
KIF14	1.8199	3.64684	9.16532	5.28497e-10	4.92127e-09	12.4995
COL6A3	1.81748	8.12244	3.8649	0.000587828	0.00126057	-1.47993
FCGR3B	1.81641	6.5905	8.60176	2.03026e-09	1.59295e-08	11.1332
COL5A2	1.81636	7.0993	5.4902	6.8251e-06	2.18126e-05	2.93454
NUSAP1	1.81614	6.08839	12.8635	2.08603e-13	6.44561e-12	20.4606
KIF2A	1.81438	5.99954	6.38181	6.02102e-07	2.44203e-06	5.37358
GZMH	1.81335	5.64627	11.2777	4.91035e-12	9.22029e-11	17.2529
ACKR3	1.81084	5.63783	12.1199	8.85601e-13	2.17535e-11	18.9928
ARRDC2	1.81033	7.49847	12.3968	5.13289e-13	1.37275e-11	19.5466
ARHGAP9	1.80898	6.21837	9.19725	4.90309e-10	4.62879e-09	12.5757
EDN1	1.80788	7.07238	5.39579	8.84963e-06	2.74646e-05	2.6746
NUS1P3	1.80742	6.01243	5.99163	1.73027e-06	6.32857e-06	4.31125
DGCR5	1.80737	6.14655	7.19706	6.95512e-08	3.56028e-07	7.55253
IL6	1.80589	5.69047	3.45129	0.00175642	0.00342002	-2.54243
ITGA5	1.80434	7.92898	9.06709	6.66213e-10	6.02031e-09	12.2644
FN1	1.80286	8.01073	8.38657	3.43186e-09	2.52261e-08	10.6006
ATP8B3	1.79412	4.17581	7.32553	4.98322e-08	2.65656e-07	7.88976
HRH1	1.79371	5.39771	10.2635	4.32529e-11	5.73514e-10	15.0422
CD200	1.79341	7.11899	10.5764	2.18067e-11	3.22551e-10	15.7381
MS4A4A	1.78866	7.47596	6.01705	1.61469e-06	5.93978e-06	4.38074
PLCB4	1.78866	6.68672	4.67936	6.38352e-05	0.00016604	0.706105
CECR1	1.78609	8.42794	6.10851	1.25958e-06	4.74684e-06	4.63049
FAM129A	1.78573	7.07972	7.7186	1.8191e-08	1.09381e-07	8.90994
LINC01111	1.78329	4.54017	5.87697	2.36492e-06	8.37784e-06	3.99731
SPARCL1	1.78328	10.5394	8.59621	2.05776e-09	1.61329e-08	11.1196
SH2B3	1.78295	7.78335	11.854	1.50738e-12	3.44261e-11	18.4526
UBE2C	1.78207	5.5643	10.0841	6.44016e-11	8.05452e-10	14.6377
CCNYL2	1.78084	3.91929	4.47785	0.000111103	0.000275686	0.157408
KRBA1	1.77983	7.34767	10.9721	9.33271e-12	1.57356e-10	16.6004
JAZF1	1.77978	6.00871	13.0137	1.56901e-13	5.04595e-12	20.7496
NLGN1	1.779	6.03618	5.47028	7.20943e-06	2.28767e-05	2.8797
PSMB10	1.77875	7.71807	7.50302	3.15405e-08	1.76831e-07	8.35265
EBF2	1.77758	4.078	11.7159	1.99364e-12	4.33105e-11	18.1686
SYNM	1.77586	7.53335	10.0433	7.05557e-11	8.7125e-10	14.545
LAG3	1.77566	4.73634	6.5799	3.54127e-07	1.52121e-06	5.90864
LOC101928054	1.7756	4.50779	12.2575	6.74541e-13	1.73166e-11	19.2692
HHEX	1.77302	5.67811	9.68281	1.59335e-10	1.75775e-09	13.7174
FYB	1.77259	5.80963	8.27466	4.52e-09	3.19961e-08	10.3213
GLUL	1.77154	8.23836	9.34823	3.44548e-10	3.43552e-09	12.934
SCD	1.77003	6.58729	14.6412	8.29057e-15	3.94062e-13	23.7304
HSPB8	1.76749	8.29467	7.57442	2.62683e-08	1.50822e-07	8.53783
EOGT	1.76697	6.61055	8.86495	1.07724e-09	9.16079e-09	11.7765
HLA-J	1.76669	10.667	11.4718	3.28475e-12	6.61666e-11	17.6614
TCF4	1.76436	7.71005	9.7576	1.34373e-10	1.51418e-09	13.8904
GPX8	1.76272	6.49809	4.94208	3.09323e-05	8.56786e-05	1.4259
CELF2	1.76191	5.73143	10.2182	4.78101e-11	6.24336e-10	14.9404
C5AR1	1.76181	7.48474	6.37843	6.07596e-07	2.45895e-06	5.36442
ZNF792	1.76177	4.12336	20.6785	9.96319e-19	2.21809e-16	32.8192
PLXDC1	1.75994	6.16157	11.6835	2.1291e-12	4.58641e-11	18.1018
PATL2	1.75917	5.00925	12.8449	2.16105e-13	6.61754e-12	20.4247
PABPC4L	1.75522	6.32078	6.61497	3.22496e-07	1.39853e-06	6.00302
TIGIT	1.75262	4.20634	11.171	6.13709e-12	1.10285e-10	17.0263
TRAT1	1.75204	3.68207	6.33005	6.92081e-07	2.76751e-06	5.23327
LILRA6	1.75116	5.46049	17.6679	6.49817e-17	7.08093e-15	28.6274
PHKA2	1.75038	7.07963	14.6975	7.52254e-15	3.68373e-13	23.8288
KIAA1551	1.75028	6.83114	11.9291	1.29611e-12	3.04148e-11	18.606
SSPN	1.74981	5.59585	10.735	1.54826e-11	2.41566e-10	16.0861
LAMA4	1.74807	5.13773	12.3133	6.04481e-13	1.5775e-11	19.3805
RCSD1	1.74674	6.44336	8.53822	2.36915e-09	1.82666e-08	10.9766
NINJ2	1.74522	5.27817	10.7605	1.4659e-11	2.31003e-10	16.1416
INPP5D	1.74494	5.62631	12.9109	1.90631e-13	6.00811e-12	20.552
LPPR5	1.74392	3.64663	6.09037	1.32311e-06	4.96068e-06	4.581
GNA15	1.74243	5.66046	9.65429	1.70064e-10	1.85711e-09	13.6511
TNFRSF11A	1.74152	4.2464	6.953	1.31726e-07	6.29764e-07	6.90696
ALOX5AP	1.74079	8.13106	5.78093	3.07447e-06	1.06266e-05	3.73389
ZNF320	1.73949	7.28223	9.5765	2.03256e-10	2.17323e-09	13.47
NAMPT	1.73898	8.53734	6.42198	5.40503e-07	2.22166e-06	5.48233
OAS2	1.73696	5.04105	15.7333	1.32279e-15	9.12415e-14	25.5872
EVA1C	1.73695	6.60781	6.30328	7.43852e-07	2.94921e-06	5.16061
COL4A1	1.73674	9.82506	6.32205	7.07173e-07	2.82016e-06	5.21154
TRIM55	1.73645	5.8582	8.20397	5.38338e-09	3.74479e-08	10.144
SLC2A1	1.73589	5.93753	9.59804	1.9345e-10	2.0768e-09	13.5203
CLTC-IT1	1.7351	4.65736	15.2702	2.84422e-15	1.66953e-13	24.8132
RAB7B	1.73415	4.76586	13.9205	2.95273e-14	1.17804e-12	22.4436
HK2	1.73345	4.86316	12.8024	2.34378e-13	7.05062e-12	20.3423
ATHL1	1.73308	7.4976	5.77362	3.13656e-06	1.08192e-05	3.71383
WISP2	1.73065	5.14404	4.98233	2.76803e-05	7.75093e-05	1.53648
AMICA1	1.72969	6.6389	9.6758	1.61909e-10	1.7823e-09	13.7011
CD3G	1.72936	4.71058	8.64192	1.84204e-09	1.4615e-08	11.232
BCL11B	1.72838	4.66274	8.86732	1.07116e-09	9.11665e-09	11.7822
FHL1	1.72807	8.36966	4.9545	2.98899e-05	8.30946e-05	1.46002
ARL4A	1.72795	7.58309	7.22846	6.40967e-08	3.3142e-07	7.63512
KCNE3	1.72769	6.98553	9.30059	3.84998e-10	3.76651e-09	12.8212
BC036055 /// PREX2	1.72718	4.16331	8.89039	1.01372e-09	8.69224e-09	11.8382
LOC101928335	1.72708	3.84994	7.58675	2.54531e-08	1.46758e-07	8.56975
CXCL16	1.72694	7.78469	7.7713	1.59149e-08	9.74393e-08	9.04535
MEF2C	1.72652	7.1009	11.9995	1.12566e-12	2.69396e-11	18.7492
NUF2	1.72634	3.51833	8.92013	9.44303e-10	8.17279e-09	11.9102
OLFML2A	1.72301	7.7188	5.976	1.80546e-06	6.57423e-06	4.26849
RNF166	1.7209	6.27421	9.07975	6.46587e-10	5.86884e-09	12.2947
PRSS16	1.71883	4.94587	5.43376	7.9715e-06	2.50245e-05	2.77914
FNDC3B	1.7166	3.95636	12.036	1.04648e-12	2.51917e-11	18.8232
HLA-DRB1 /// HLA-DRB1	1.71595	11.9323	7.95424	1.00345e-08	6.47893e-08	9.51271
MMRN1	1.71501	3.73353	5.93198	2.03547e-06	7.3194e-06	4.148
CCRL2	1.71069	5.56703	12.255	6.7788e-13	1.73588e-11	19.2642
BEST4	1.70857	3.79067	6.95181	1.32138e-07	6.31585e-07	6.90381
C6orf223	1.7085	5.99513	16.6972	2.84395e-16	2.4792e-14	27.1395
ABCA1	1.70779	6.4084	14.9494	4.88688e-15	2.61469e-13	24.2655
BC069782 /// STAMBPL1	1.70751	4.87179	25.4275	3.65204e-21	1.59182e-18	38.3868
ERO1L	1.70308	7.52466	10.0631	6.74957e-11	8.36996e-10	14.59
PVRIG	1.69835	5.66368	7.32165	5.03349e-08	2.67616e-07	7.87961
AOAH	1.69702	6.79121	8.3554	3.70487e-09	2.69621e-08	10.523
NNMT	1.69701	5.35619	5.62393	4.72682e-06	1.56577e-05	3.30252
SLC41A2	1.69566	6.00092	10.4238	3.04076e-11	4.23762e-10	15.4002
EHBP1L1	1.69427	5.73487	12.8554	2.11822e-13	6.5254e-12	20.445
RRAD	1.69324	6.46243	6.43575	5.20886e-07	2.14878e-06	5.51959
PECAM1	1.6909	7.88625	12.2319	7.09516e-13	1.80561e-11	19.2179
C4orf6	1.69081	4.01526	4.512	0.000101157	0.000252997	0.250148
CENPU	1.69014	4.85069	10.4244	3.03686e-11	4.23507e-10	15.4015
EDIL3	1.68887	5.97865	7.13209	8.23864e-08	4.14176e-07	7.38128
GBP4	1.68746	5.85992	6.91549	1.45397e-07	6.89173e-07	6.80721
MATN1-AS1	1.68223	4.08087	16.858	2.21622e-16	2.04511e-14	27.3911
CMPK2	1.68027	6.58693	9.7739	1.29488e-10	1.46638e-09	13.9281
SLC38A1	1.67892	7.24271	11.7065	2.0321e-12	4.3913e-11	18.1492
PLXNC1	1.67811	5.65884	12.2025	7.51973e-13	1.88094e-11	19.1589
VSIG1	1.67809	3.90018	11.0161	8.50305e-12	1.44679e-10	16.695
FILIP1	1.67806	4.46589	9.18353	5.06369e-10	4.75847e-09	12.5429
LOC401220	1.67781	3.19418	6.13065	1.18618e-06	4.49583e-06	4.6909
DPEP2	1.67564	5.38723	11.7143	1.99978e-12	4.33519e-11	18.1655
SIT1	1.67414	5.47399	14.7567	6.79351e-15	3.43634e-13	23.9321
MYO1G	1.67325	6.13545	9.26137	4.21931e-10	4.06761e-09	12.7282
SLC1A3	1.67217	5.12237	10.5032	2.55691e-11	3.68619e-10	15.5763
RAB31	1.67137	8.5911	7.78506	1.53701e-08	9.44426e-08	9.08063
BAZ1A	1.67053	7.07544	10.0762	6.55568e-11	8.16908e-10	14.6196
TREM1	1.67005	4.67921	6.2576	8.41426e-07	3.29085e-06	5.0365
IGKx	1.6696	5.97451	4.40961	0.000133969	0.000326881	-0.0274912
CHST11	1.66917	5.93302	9.17797	5.13014e-10	4.80932e-09	12.5297
LOC101928554	1.66715	3.86799	8.58545	2.11223e-09	1.65157e-08	11.0931
NCAPG	1.6662	3.63716	10.712	1.62678e-11	2.52089e-10	16.0358
NRG3	1.66504	4.54579	10.8663	1.16892e-11	1.90505e-10	16.3717
RNF149	1.66401	10.0224	16.3504	4.90248e-16	3.84798e-14	26.5899
ZBED6CL	1.66359	6.38755	10.2477	4.47862e-11	5.90025e-10	15.0068
ERAP2	1.66064	5.16308	6.39017	5.88715e-07	2.39484e-06	5.39623
MCTP2	1.65941	4.96432	15.4499	2.10866e-15	1.32509e-13	25.1158
IL1B	1.65695	6.42538	5.78748	3.01988e-06	1.04538e-05	3.75187
NDC80	1.65618	4.71934	7.20857	6.74988e-08	3.46735e-07	7.58282
MAN2B1	1.65499	7.83312	10.6118	2.01954e-11	3.03538e-10	15.8161
S100A9	1.65347	7.52706	5.78894	3.00788e-06	1.04175e-05	3.75587
CCNB1	1.65328	4.89532	7.01047	1.13265e-07	5.49325e-07	7.05953
LDHA	1.65076	12.6366	17.9051	4.57767e-17	5.15265e-15	28.9801
MYADM	1.64624	7.87551	7.54696	2.81801e-08	1.60405e-07	8.4667
TSPAN13	1.64601	8.10307	5.8599	2.47771e-06	8.73187e-06	3.95052
COL1A2	1.64558	8.60691	3.67118	0.000985352	0.00201718	-1.98293
LOC100127972	1.64252	4.63632	9.75189	1.36131e-10	1.53061e-09	13.8772
CD96	1.64118	3.73542	8.96962	8.3938e-10	7.38323e-09	12.0298
IL21R	1.64028	4.16517	10.2569	4.38899e-11	5.79011e-10	15.0273
GMFG	1.63878	7.52022	10.5866	2.13298e-11	3.16868e-10	15.7605
AHR	1.63834	8.87713	8.53349	2.3966e-09	1.84505e-08	10.9649
RSPH9	1.63646	4.27122	9.24658	4.36787e-10	4.18327e-09	12.693
LGALS3	1.63538	7.80704	12.8886	1.98858e-13	6.2386e-12	20.5091
FLJ12120	1.63322	3.66864	12.4491	4.63477e-13	1.26008e-11	19.6502
TPX2	1.63212	4.99997	8.4739	2.77134e-09	2.09419e-08	10.8175
HLA-C	1.63111	11.9944	14.0402	2.38274e-14	9.74308e-13	22.661
SNORD89	1.6306	6.44554	11.7086	2.02345e-12	4.37723e-11	18.1535
CDK18	1.63046	7.45861	8.21119	5.28797e-09	3.68718e-08	10.1621
ARRDC3	1.62669	9.56206	10.4466	2.89263e-11	4.06679e-10	15.451
OGFRL1	1.62365	6.81524	9.92058	9.29285e-11	1.1017e-09	14.2651
CALCRL	1.62287	5.92597	10.9567	9.64371e-12	1.61406e-10	16.5671
RPA4	1.62266	3.90613	17.3122	1.10723e-16	1.11737e-14	28.0906
TAGAP	1.62256	4.79639	9.1762	5.15158e-10	4.81706e-09	12.5255
RGS5	1.62199	7.88801	7.0594	9.96311e-08	4.89811e-07	7.18916
HPCAL1	1.62099	9.1409	9.28307	4.01064e-10	3.89762e-09	12.7797
APOBEC3B	1.61997	5.12808	5.63186	4.62501e-06	1.53629e-05	3.32434
GXYLT2	1.61976	5.4765	3.73502	0.000831685	0.00172833	-1.81813
TCF19	1.61929	5.60013	10.2609	4.34959e-11	5.7599e-10	15.0365
FZD1	1.61877	6.21474	10.7397	1.5326e-11	2.3967e-10	16.0964
GAL3ST4	1.61802	6.96685	8.60752	2.00208e-09	1.57265e-08	11.1474
PCDHB6	1.61683	4.6911	9.13014	5.7411e-10	5.2907e-09	12.4154
SLC15A4	1.6127	6.78458	14.5979	8.93494e-15	4.16003e-13	23.6546
KCNK17	1.61184	4.14352	16.6891	2.87994e-16	2.49994e-14	27.1268
ANXA2R	1.61175	5.89741	12.6793	2.96741e-13	8.69677e-12	20.1029
SPIRE1	1.61052	6.7846	14.7917	6.39751e-15	3.27648e-13	23.9929
PREX1	1.61028	7.42219	13.4736	6.65636e-14	2.42652e-12	21.6194
LOC100507336	1.60933	4.34754	30.0722	3.58279e-23	3.66985e-20	42.9039
CD33	1.60923	5.78454	11.9092	1.34901e-12	3.14402e-11	18.5653
P2RY13	1.60921	5.37371	7.17139	7.43606e-08	3.78378e-07	7.48492
NDRG1	1.6086	11.9128	9.9164	9.38065e-11	1.10954e-09	14.2556
LOC100506691	1.6082	5.36285	5.99902	1.69583e-06	6.21148e-06	4.33145
LPAR5	1.6079	4.68131	9.7411	1.39513e-10	1.56349e-09	13.8523
PDLIM1	1.60785	10.1528	9.24584	4.37536e-10	4.18849e-09	12.6913
STK10	1.60738	6.44033	17.6935	6.25639e-17	6.85393e-15	28.6656
ANO1	1.60705	5.41449	9.47668	2.55806e-10	2.65339e-09	13.2364
MAP3K8	1.60641	6.21753	6.69162	2.62963e-07	1.1678e-06	6.20893
CHST15	1.60512	6.74147	10.3276	3.75506e-11	5.07428e-10	15.1858
ITGB2-AS1	1.6036	5.82251	7.4286	3.81906e-08	2.10033e-07	8.159
PRF1	1.60339	6.56216	10.2303	4.65429e-11	6.09641e-10	14.9677
FRMD6	1.60306	6.38468	5.86928	2.41505e-06	8.53308e-06	3.97624
PARP8	1.60275	6.47158	8.7122	1.55441e-09	1.26014e-08	11.4043
NRTN	1.60248	4.30493	7.79279	1.50723e-08	9.28353e-08	9.10046
FMNL1	1.60055	5.31019	14.5	1.05924e-14	4.82214e-13	23.4823
LINC01268	1.60002	5.72075	5.87609	2.37062e-06	8.39344e-06	3.9949
PSTPIP1	1.59986	5.46046	8.04835	7.928e-09	5.25608e-08	9.75154
XAF1	1.59565	7.14856	10.4999	2.57501e-11	3.70708e-10	15.5692
WDR54	1.59404	8.46695	10.5538	2.29e-11	3.35572e-10	15.6883
RAPGEF4	1.59396	5.55601	8.78221	1.31344e-09	1.08716e-08	11.5752
ASPHD1	1.5932	5.7835	8.17491	5.78553e-09	3.99873e-08	10.0709
IL10RB	1.59204	7.86757	11.3738	4.02172e-12	7.81894e-11	17.4557
CLEC14A	1.59118	6.82655	8.40917	3.2469e-09	2.39784e-08	10.6568
DPYSL2	1.59025	10.4661	11.2589	5.10695e-12	9.47653e-11	17.213
DUSP5P1	1.58892	3.29027	11.81	1.64741e-12	3.70053e-11	18.3624
DUSP1	1.58793	8.63575	10.1705	5.31384e-11	6.81166e-10	14.833
SPARC	1.58449	10.5395	7.88725	1.18749e-08	7.52456e-08	9.34204
AQP9	1.58342	6.07854	3.95464	0.000461814	0.00101173	-1.24413
NCF2	1.58337	6.45784	6.21089	9.54592e-07	3.69465e-06	4.90947
ZNF611	1.58238	6.15119	26.8965	7.81406e-22	4.32646e-19	39.9016
TNFRSF1B	1.58162	7.2849	9.14908	5.49079e-10	5.08289e-09	12.4607
TMCC1	1.57967	6.82581	19.5514	4.45897e-18	7.61221e-16	31.3192
MELK	1.57935	5.86775	7.12912	8.30277e-08	4.16684e-07	7.37344
PARP12	1.57886	7.33104	10.2345	4.61162e-11	6.04438e-10	14.977
PRR11	1.57864	8.20627	13.5813	5.4621e-14	2.03448e-12	21.82
DEF6	1.5757	5.56289	14.3344	1.41525e-14	6.19807e-13	23.1888
CRIP1	1.57531	7.66375	5.04275	2.34285e-05	6.66235e-05	1.70259
CLEC7A	1.57424	4.71927	12.6034	3.43557e-13	9.87113e-12	19.9542
LAIR1	1.57294	6.76112	9.69735	1.54135e-10	1.70774e-09	13.7511
TLR4	1.57025	5.48539	11.2509	5.19232e-12	9.60885e-11	17.1962
FSCN1	1.56993	5.76245	9.17655	5.14732e-10	4.81706e-09	12.5263
UBE2L6	1.56861	8.556	12.2368	7.02678e-13	1.79266e-11	19.2277
FGR	1.56765	6.28535	9.13363	5.6941e-10	5.25211e-09	12.4238
HLX	1.56555	6.75653	12.3807	5.29644e-13	1.41096e-11	19.5147
HMOX1	1.56536	9.5038	6.5245	4.10636e-07	1.73772e-06	5.75934
FAM81B	1.56383	4.1707	3.83445	0.00063781	0.00135724	-1.55956
NCF4	1.56368	5.99443	6.97276	1.25056e-07	6.0082e-07	6.95946
PMEPA1	1.55989	7.47834	7.08564	9.30179e-08	4.61619e-07	7.25858
SERPINB9P1	1.55916	4.83189	4.85165	3.96994e-05	0.00010762	1.1777
RIMKLA	1.55847	4.43574	9.71986	1.46426e-10	1.62938e-09	13.8032
ETV7	1.55835	4.68432	13.6011	5.26815e-14	1.973e-12	21.8566
LOC338620	1.5582	4.91195	8.34278	3.82162e-09	2.77132e-08	10.4915
PRDX4	1.55787	10.1021	12.8775	2.03121e-13	6.31432e-12	20.4876
KIF11	1.55743	4.20715	8.3509	3.74605e-09	2.72051e-08	10.5118
ITGAM	1.55602	6.91075	7.02384	1.09361e-07	5.32662e-07	7.09498
COL6A2	1.55442	7.2725	8.48791	2.67818e-09	2.03129e-08	10.8522
TMEM173	1.55437	7.24392	7.96369	9.79921e-09	6.3407e-08	9.53675
TM4SF18	1.55413	8.11171	9.17963	5.11027e-10	4.79565e-09	12.5336
GSAP	1.553	8.43402	12.9068	1.92123e-13	6.04583e-12	20.5441
IL10	1.5526	3.91826	10.5051	2.54608e-11	3.67317e-10	15.5806
HCG27	1.55194	5.17127	9.49165	2.47111e-10	2.57842e-09	13.2716
DEGS1	1.5509	9.60326	8.32139	4.02811e-09	2.89036e-08	10.4381
LINC00324	1.55073	5.71378	10.1253	5.87567e-11	7.42328e-10	14.7309
SLC27A3	1.55026	6.92954	11.8916	1.3975e-12	3.22254e-11	18.5295
POU5F1P3	1.54885	6.04608	10.4291	3.00571e-11	4.2002e-10	15.412
HLA-E	1.54877	10.9267	11.9559	1.22825e-12	2.90554e-11	18.6606
INSIG2	1.54853	8.63656	11.0487	7.93669e-12	1.36171e-10	16.7651
STX11	1.54795	4.49428	9.97463	8.22912e-11	9.95309e-10	14.3886
IRF8	1.54754	7.89014	6.21783	9.36843e-07	3.63282e-06	4.92836
RASSF5	1.54561	6.08169	8.97912	8.20639e-10	7.24639e-09	12.0527
MIAT	1.54551	5.13301	6.3568	6.43994e-07	2.59192e-06	5.30581
CHSY1	1.54547	9.20117	8.10508	6.88208e-09	4.64076e-08	9.89497
GNRH1	1.54431	4.46031	12.3449	5.6818e-13	1.4987e-11	19.4434
ZBED8	1.544	5.94922	7.25371	6.00277e-08	3.13466e-07	7.70146
RASSF6	1.54373	6.97031	5.74337	3.40722e-06	1.16703e-05	3.63078
SIGLEC1	1.54339	6.28128	7.32897	4.93907e-08	2.63632e-07	7.89877
ZNF702P	1.54184	4.57554	5.94643	1.95686e-06	7.0605e-06	4.18757
PKM	1.54053	8.19254	12.3763	5.34283e-13	1.42147e-11	19.5059
SIRPB2	1.54047	5.04395	10.4043	3.17338e-11	4.38662e-10	15.3568
NCAPG2	1.54011	5.14088	10.4941	2.60757e-11	3.73319e-10	15.5564
LRRC41	1.53995	6.01355	8.02888	8.32337e-09	5.47658e-08	9.70221
LST1	1.53878	6.79511	9.04217	7.06667e-10	6.33004e-09	12.2045
MYO1F	1.53819	7.17571	7.75428	1.66161e-08	1.01159e-07	9.00166
STK39	1.53773	7.96523	4.80187	4.55424e-05	0.000121974	1.04125
CD74	1.537	8.64626	8.04845	7.92613e-09	5.25608e-08	9.75178
FAM198B	1.53605	6.5684	8.23435	4.99338e-09	3.49964e-08	10.2203
CD93	1.53563	8.50687	7.76156	1.63124e-08	9.95165e-08	9.02035
TAGLN2	1.5346	9.06573	9.87574	1.02816e-10	1.19948e-09	14.1624
SAMD9	1.53391	5.81116	7.53866	2.87857e-08	1.63534e-07	8.44517
IFI44	1.53321	6.53605	7.9157	1.10544e-08	7.05705e-08	9.4146
CD72	1.53087	5.44648	6.50159	4.36609e-07	1.83437e-06	5.6975
CEP55	1.52897	3.61369	6.29907	7.52358e-07	2.98062e-06	5.14916
RAB27A	1.52859	6.9101	7.76363	1.62271e-08	9.91143e-08	9.02566
SLC35G2	1.52735	5.4521	9.74871	1.37119e-10	1.54088e-09	13.8699
WIPF1	1.52671	6.27829	13.3667	8.10759e-14	2.86366e-12	21.4194
NUCB2	1.52599	7.29973	14.5223	1.01884e-14	4.66932e-13	23.5217
SERPINB9	1.52504	6.18286	9.99504	7.86083e-11	9.57414e-10	14.4352
PKIB	1.52454	4.52642	7.9945	9.07102e-09	5.92001e-08	9.61501
ICAM1	1.52427	6.90033	8.67913	1.68354e-09	1.3467e-08	11.3233
S1PR1	1.52377	7.31902	9.68542	1.58388e-10	1.75013e-09	13.7234
C19orf33	1.52372	7.24976	4.18667	0.000246316	0.000570559	-0.627602
SAP30	1.52354	5.59924	26.6378	1.01931e-21	5.35425e-19	39.641
S100A8	1.52328	6.37212	5.93369	2.02599e-06	7.2917e-06	4.15269
SLC9A9	1.52313	6.08337	8.75321	1.40826e-09	1.15583e-08	11.5045
IL15	1.52211	6.18523	11.5247	2.94599e-12	6.04121e-11	17.7719
ARHGAP22	1.52084	3.93419	16.6448	3.08575e-16	2.66728e-14	27.0572
MYO3A	1.51886	3.73353	18.8249	1.21967e-17	1.73514e-15	30.3096
RECQL	1.51864	7.75171	13.6193	5.09556e-14	1.92242e-12	21.8904
BCL11A	1.51824	4.93444	7.16801	7.50171e-08	3.81435e-07	7.47603
ADAP2	1.51758	7.60191	9.22634	4.57978e-10	4.3577e-09	12.6449
MDFIC	1.51611	5.79163	13.7105	4.31561e-14	1.66184e-12	22.0589
APOL3	1.51497	7.2071	9.57571	2.03629e-10	2.17494e-09	13.4682
CDKN2B	1.51192	3.93747	17.511	8.21093e-17	8.6261e-15	28.3918
RUNX3	1.51079	5.59588	8.97019	8.3823e-10	7.37628e-09	12.0311
CD44	1.51053	5.39915	7.45834	3.53766e-08	1.95872e-07	8.23647
TUBA1A	1.50814	10.9029	6.46398	4.82895e-07	2.00905e-06	5.59592
PLEK	1.50525	6.78046	6.91709	1.44787e-07	6.87078e-07	6.81145
GPAT2	1.50315	5.48563	7.65187	2.15558e-08	1.26531e-07	8.73804
UNC5B	1.50232	7.06717	16.0742	7.61526e-16	5.69366e-14	26.1452
LOC157562	1.50219	6.00541	15.4065	2.26629e-15	1.36953e-13	25.0429
RPL36	1.50192	10.5962	16.0459	7.96945e-16	5.91529e-14	26.0992
KIAA1462	1.49903	5.95128	6.20885	9.5987e-07	3.71367e-06	4.90392
PSORS1C1	1.49891	4.07885	9.78181	1.27183e-10	1.44507e-09	13.9463
CCDC110	1.49699	3.85577	7.42656	3.83915e-08	2.10911e-07	8.15369
CDH5	1.49631	7.19097	7.99524	9.05433e-09	5.911e-08	9.61688
IGBP1	1.49618	8.85503	15.0238	4.30666e-15	2.35899e-13	24.3934
NR3C1	1.49607	8.70015	10.4463	2.89435e-11	4.06679e-10	15.4504
SFR1	1.49457	6.27009	14.5945	8.98733e-15	4.17493e-13	23.6487
PSORS1C3	1.49455	4.8453	3.87093	0.000578394	0.00124229	-1.46413
FGFBP2	1.49452	3.9403	6.79747	1.98577e-07	9.08152e-07	6.49241
TTC13	1.49419	7.06058	8.04162	8.06244e-09	5.32797e-08	9.73449
ARPC1B	1.49276	9.45923	6.37426	6.14452e-07	2.48277e-06	5.35312
SCARF1	1.49202	5.203	18.8978	1.10088e-17	1.58821e-15	30.4125
PPP1R18	1.49062	7.80011	8.2401	4.92278e-09	3.4537e-08	10.2347
PFKFB4	1.48972	5.79964	16.4376	4.2711e-16	3.43433e-14	26.7291
COL15A1	1.48926	8.21627	4.02048	0.000386623	0.0008596	-1.07014
PLEKHO1	1.48926	6.98665	7.2586	5.92701e-08	3.1038e-07	7.71431
SELL	1.489	6.28433	6.79148	2.01754e-07	9.2093e-07	6.47638
CD53	1.48751	5.87803	11.0882	7.3032e-12	1.2748e-10	16.8496
KBTBD8	1.48662	4.00093	9.97088	8.29875e-11	1.00241e-09	14.3801
GTSF1	1.48632	4.28371	9.17873	5.12102e-10	4.80353e-09	12.5315
LRIG3	1.48629	6.56463	5.71705	3.66186e-06	1.24447e-05	3.55848
ALDOA	1.48555	11.0776	16.6218	3.19885e-16	2.74191e-14	27.0208
LY75	1.48467	6.99085	5.04269	2.3432e-05	6.66244e-05	1.70244
LOC340340	1.48386	3.45979	4.36224	0.000152526	0.000367693	-0.155531
CD37	1.47691	5.15305	14.2695	1.58653e-14	6.85687e-13	23.0731
DNMT1	1.47676	7.78721	9.37555	3.23339e-10	3.25367e-09	12.9985
SERPING1	1.47637	9.96071	5.50214	6.60457e-06	2.12104e-05	2.96742
SFMBT2	1.47564	5.19719	13.2529	1.0017e-13	3.40876e-12	21.2049
GRIK3	1.47559	3.60971	10.7065	1.64616e-11	2.54131e-10	16.0238
CD40	1.47511	6.63163	19.7569	3.37406e-18	6.01053e-16	31.5986
GPR84	1.47418	4.25005	6.7483	2.26212e-07	1.02052e-06	6.36087
IL2RB	1.47371	6.77123	6.62169	3.16766e-07	1.37776e-06	6.02111
APOB	1.4733	4.77146	3.02018	0.00527791	0.00928815	-3.59514
PMAIP1	1.47311	4.37391	5.5257	6.19035e-06	2.00094e-05	3.03228
MCM2	1.47254	6.74712	9.93165	9.06408e-11	1.07832e-09	14.2905
SEC61G	1.47224	9.63722	14.1732	1.88092e-14	7.92852e-13	22.9006
PLIN2	1.47145	7.63582	13.3775	7.94775e-14	2.8218e-12	21.4396
KCNE4	1.46986	4.83866	7.75377	1.66379e-08	1.01231e-07	9.00034
STIL	1.46708	5.6257	7.17279	7.40892e-08	3.77185e-07	7.48861
HLA-A	1.46676	12.8804	14.8121	6.17783e-15	3.17191e-13	24.0282
FERMT3	1.46449	6.26579	8.91536	9.55102e-10	8.2523e-09	11.8986
EDNRB	1.46246	8.00664	5.47257	7.16414e-06	2.27472e-05	2.88601
RGS10	1.46121	5.89831	10.3196	3.82174e-11	5.15506e-10	15.1679
TMEM44	1.45994	5.78149	9.82293	1.1586e-10	1.33568e-09	14.041
POU5F1P4	1.45977	6.0365	10.3932	3.25147e-11	4.47645e-10	15.3321
CDC7	1.45896	5.31022	4.89822	3.49119e-05	9.56796e-05	1.30548
PLP2	1.45863	8.20809	5.7056	3.77853e-06	1.28136e-05	3.52702
BTG1	1.45691	8.53948	12.3047	6.1475e-13	1.59718e-11	19.3634
SEC14L4	1.45645	4.46453	11.7667	1.79824e-12	3.98688e-11	18.2734
EDNRA	1.45289	5.95586	5.82509	2.72486e-06	9.51382e-06	3.85506
MET	1.45245	7.47245	10.2064	4.90743e-11	6.36691e-10	14.9139
WWC3	1.45183	7.79068	15.4171	2.22669e-15	1.36574e-13	25.0607
SLC6A1	1.45148	4.54353	6.28013	7.91787e-07	3.11754e-06	5.09772
JAG2	1.45116	6.98375	12.0599	9.97777e-13	2.41613e-11	18.8716
LSP1	1.45091	6.30733	7.83621	1.35059e-08	8.42258e-08	9.21163
MXRA7	1.44896	7.50843	4.52725	9.70074e-05	0.000243362	0.291583
NAPSB	1.44843	5.82436	6.13508	1.17203e-06	4.45212e-06	4.70296
FCGR2B	1.44717	6.41381	4.44673	0.000121006	0.000298152	0.0730278
LOC100996385	1.44705	3.69697	14.368	1.33415e-14	5.91589e-13	23.2486
APCDD1	1.44666	6.24805	5.0846	2.08727e-05	6.00728e-05	1.81772
LEPROTL1	1.44642	8.56417	10.5557	2.2808e-11	3.34677e-10	15.6924
P4HB	1.44635	9.74505	11.2992	4.6954e-12	8.92299e-11	17.2984
LOC283070	1.44615	6.10793	9.43999	2.78454e-10	2.85649e-09	13.1503
IFNGR1	1.44608	8.13988	9.40007	3.05443e-10	3.09621e-09	13.0563
PGK1	1.44475	9.03259	16.1722	6.50846e-16	4.95659e-14	26.3038
BUB1B	1.44142	5.01591	7.21924	6.56523e-08	3.38438e-07	7.61087
IFNGR2	1.43992	9.21155	12.0376	1.04311e-12	2.51401e-11	18.8265
CEBPA	1.43967	6.68602	7.71285	1.84586e-08	1.10698e-07	8.89515
PRIM1	1.43956	6.27133	11.0051	8.7029e-12	1.47589e-10	16.6714
ZNF267	1.43871	6.84762	10.4102	3.13268e-11	4.34209e-10	15.37
DOCK4	1.43764	5.88141	10.4708	2.74384e-11	3.90078e-10	15.5046
SMC4	1.43669	5.92501	15.2377	3.00318e-15	1.72818e-13	24.7581
DSN1	1.4353	6.14107	14.6966	7.53433e-15	3.68373e-13	23.8273
MAP4K4	1.43441	6.53094	8.28039	4.45649e-09	3.15793e-08	10.3356
ABCC3	1.43417	7.46098	8.41502	3.20065e-09	2.36966e-08	10.6714
ANXA1	1.43362	6.24064	5.25005	1.32234e-05	3.95524e-05	2.27319
COL4A2	1.43323	9.5393	5.88657	2.30374e-06	8.18354e-06	4.02363
KIF4A	1.43246	4.46389	9.24827	4.3506e-10	4.17064e-09	12.6971
BCAT1	1.43123	5.29405	7.08154	9.40202e-08	4.65466e-07	7.24775
SMAP2	1.43055	7.72743	8.96345	8.51782e-10	7.46987e-09	12.0149
VLDLR	1.43042	7.80267	6.77841	2.08858e-07	9.50101e-07	6.44145
VWCE	1.43021	6.20048	5.52005	6.28722e-06	2.02963e-05	3.01673
OR51E1	1.42983	4.58072	6.11707	1.23066e-06	4.65155e-06	4.65385
TNIP3	1.42673	3.29708	5.88283	2.3274e-06	8.26043e-06	4.01337
KCTD9	1.4257	7.99902	14.7575	6.78362e-15	3.43634e-13	23.9335
HCG4	1.42567	5.16435	5.61075	4.90086e-06	1.61725e-05	3.26628
FIGNL1	1.42558	5.20825	9.13912	5.62107e-10	5.1941e-09	12.4369
HPSE	1.42468	5.13108	6.83666	1.79022e-07	8.31056e-07	6.59709
B2M	1.42388	10.5013	14.3295	1.42733e-14	6.23462e-13	23.1802
GNG11	1.42385	7.16049	6.83779	1.78486e-07	8.29131e-07	6.60011
OSMR	1.42332	7.03303	5.05867	2.2421e-05	6.40788e-05	1.74639
CPOX	1.42036	7.34175	7.52737	2.96311e-08	1.67686e-07	8.41587
SFRP4	1.41862	4.57741	3.61388	0.00114661	0.00231628	-2.13
DOCK8	1.41647	6.40607	15.4676	2.04785e-15	1.29482e-13	25.1454
GUCY1A3	1.41616	7.84475	9.14949	5.48555e-10	5.08263e-09	12.4617
KIF21B	1.41601	5.45526	10.7612	1.46349e-11	2.30801e-10	16.1433
TRPC2	1.41598	4.81253	5.41785	8.32829e-06	2.60399e-05	2.73534
CSGALNACT2	1.41581	6.73651	14.5194	1.02397e-14	4.68236e-13	23.5166
DDX60	1.41503	7.58336	11.1749	6.087e-12	1.09673e-10	17.0347
C3AR1	1.41227	8.32708	6.38641	5.94707e-07	2.41586e-06	5.38603
DPYSL3	1.41106	4.99323	7.65063	2.16244e-08	1.26861e-07	8.73483
CD48	1.41004	5.73032	8.71519	1.54328e-09	1.25161e-08	11.4116
TMEM155	1.40907	3.80978	6.38237	6.01197e-07	2.43932e-06	5.37509
ZFAS1	1.40801	8.85956	10.6147	2.00678e-11	3.02063e-10	15.8225
GIMAP4	1.40798	7.83269	9.53167	2.25333e-10	2.3758e-09	13.3653
LYN	1.40764	7.51248	6.82393	1.85149e-07	8.55426e-07	6.5631
DARS	1.4076	9.47466	12.0762	9.65927e-13	2.35852e-11	18.9046
COL1A1	1.40741	7.10524	4.42074	0.000129944	0.000317855	0.00263351
OSCAR	1.40718	4.1912	10.7041	1.65472e-11	2.55068e-10	16.0185
RAB38	1.40695	6.9821	11.051	7.8994e-12	1.35875e-10	16.7698
TBC1D10C	1.40693	6.0158	8.85848	1.09405e-09	9.25759e-09	11.7608
KIF18A	1.40647	3.51566	14.0762	2.23489e-14	9.26799e-13	22.7259
SORCS3	1.40626	3.4446	2.95338	0.00622962	0.0107933	-3.75205
ANKRD13A	1.40538	8.09298	8.68241	1.67027e-09	1.33713e-08	11.3313
OAS1	1.40501	7.36324	8.208	5.32989e-09	3.71388e-08	10.1541
LINGO1	1.4045	5.95256	9.74032	1.3976e-10	1.5654e-09	13.8505
ARHGEF10	1.4044	6.18957	11.7153	1.99604e-12	4.33167e-11	18.1674
SEC24D	1.40352	4.74048	7.89552	1.16302e-08	7.38943e-08	9.36314
GRAMD4	1.40323	6.63683	9.83997	1.11475e-10	1.28949e-09	14.0802
IRF1	1.40215	7.42024	6.6184	3.1956e-07	1.38785e-06	6.01225
FANCL	1.40215	7.54735	10.3611	3.48848e-11	4.75482e-10	15.2606
ATAD2	1.40132	4.41597	10.5191	2.46987e-11	3.58404e-10	15.6115
PPP1R3B	1.40031	5.99462	13.119	1.28672e-13	4.23111e-12	20.9508
EVL	1.40016	7.6139	10.4093	3.13866e-11	4.34743e-10	15.368
STAT1	1.40007	7.91548	6.73215	2.36118e-07	1.06031e-06	6.31761
ASPM	1.39868	3.44858	11.4889	3.17093e-12	6.4126e-11	17.6972
CCNA2	1.39863	4.50982	9.25434	4.28921e-10	4.12335e-09	12.7115
AFAP1L1	1.39739	5.88436	12.88	2.02133e-13	6.30102e-12	20.4925
TMEM154	1.39631	4.27475	9.66268	1.66835e-10	1.82671e-09	13.6706
PRR16	1.39616	3.86155	15.0202	4.33315e-15	2.36717e-13	24.3872
CYTIP	1.39559	6.78369	5.37268	9.43115e-06	2.91016e-05	2.61095
BMP2K	1.39506	5.48617	10.8964	1.09625e-11	1.80729e-10	16.4369
PCSK5	1.39447	5.49702	8.56329	2.22902e-09	1.73297e-08	11.0385
MS4A14	1.3936	5.52316	6.2957	7.59222e-07	3.00375e-06	5.14001
IFI6	1.3935	7.13148	7.7051	1.88253e-08	1.12567e-07	8.87522
DOCK2	1.39298	4.8027	10.6711	1.77655e-11	2.71397e-10	15.9463
SLC16A1	1.39249	6.29124	7.15044	7.85346e-08	3.97151e-07	7.42969
CTSW	1.39209	6.17151	5.90018	2.2198e-06	7.92245e-06	4.06091
MYEOV	1.39182	5.68819	6.15398	1.11354e-06	4.24961e-06	4.75448
MAD2L1	1.39163	4.46575	8.84369	1.13344e-09	9.54362e-09	11.7248
MTFP1	1.3912	8.02715	9.63831	1.76399e-10	1.92117e-09	13.614
IER5	1.39037	8.039	6.68583	2.67044e-07	1.18361e-06	6.19339
NOTCH2NL	1.3885	9.38607	8.1425	6.27041e-09	4.28757e-08	9.98934
MSC	1.38769	5.03356	9.78447	1.26418e-10	1.44054e-09	13.9524
MGC70870	1.38735	5.32482	10.7069	1.64484e-11	2.54118e-10	16.0246
TMEM2	1.38662	7.45642	9.25939	4.23883e-10	4.08451e-09	12.7235
PRG2	1.38595	4.35001	7.93442	1.05463e-08	6.76854e-08	9.46228
LINC00173	1.38446	5.67625	7.71352	1.84269e-08	1.10604e-07	8.89689
PMCH	1.38441	4.45188	6.64828	2.95102e-07	1.29315e-06	6.09258
EMILIN2	1.38284	5.10763	15.4768	2.01663e-15	1.283e-13	25.1609
ZAP70	1.38265	5.34999	8.93637	9.08467e-10	7.89264e-09	11.9495
SGOL2	1.3822	4.80963	9.82653	1.14919e-10	1.32633e-09	14.0493
MOCOS	1.38025	4.64948	4.2992	0.000181222	0.000430786	-0.325506
SLMO1	1.38014	4.42073	9.54	2.21055e-10	2.33792e-09	13.3848
PBX4	1.37952	5.2763	10.1657	5.37099e-11	6.86829e-10	14.8222
IL1RAP	1.37926	4.73348	8.61408	1.97052e-09	1.55441e-08	11.1635
PLEKHA2	1.37898	7.02226	11.3636	4.10762e-12	7.93856e-11	17.4343
LOC100422737	1.37892	7.96027	6.74938	2.2557e-07	1.01852e-06	6.36374
TNFRSF9	1.37816	4.12345	7.74128	1.71733e-08	1.04272e-07	8.96825
PRUNE2	1.37737	7.75796	8.30458	4.19844e-09	2.99684e-08	10.3961
GPR82	1.37648	3.35835	5.26922	1.25427e-05	3.77147e-05	2.32598
IFNG	1.37516	3.95257	6.27787	7.96615e-07	3.13414e-06	5.0916
LY6E	1.37459	8.25105	4.46219	0.00011598	0.000286641	0.114949
FOXF1	1.37384	5.56533	6.41566	5.49746e-07	2.25357e-06	5.46524
DENND1C	1.37353	6.20712	11.1443	6.4906e-12	1.15724e-10	16.9694
BCL6	1.37289	7.65987	6.97137	1.25513e-07	6.02735e-07	6.95578
ACSL5	1.37244	6.91014	5.88204	2.33241e-06	8.27248e-06	4.01121
LOC101929465	1.37243	5.17155	6.27692	7.98657e-07	3.14036e-06	5.08902
MAFB	1.3709	9.18646	6.93145	1.39413e-07	6.63419e-07	6.84966
SLC1A4	1.37067	5.4591	19.4481	5.13479e-18	8.47048e-16	31.1777
UCP2	1.36995	7.99423	5.88869	2.29047e-06	8.1477e-06	4.02944
DLGAP5	1.36899	3.54655	6.53022	4.04407e-07	1.71419e-06	5.77475
SLC16A1-AS1	1.36568	4.4933	20.3229	1.58612e-18	3.21716e-16	32.3543
GM2A	1.36555	6.15999	11.8913	1.39844e-12	3.22254e-11	18.5288
TACC3	1.36539	5.74722	12.3971	5.12982e-13	1.37275e-11	19.5472
TNFRSF10B	1.36482	7.17353	10.239	4.56543e-11	5.99919e-10	14.9873
MYBL1	1.36469	5.25278	10.4541	2.8457e-11	4.02326e-10	15.4676
LRRK1	1.36366	5.11042	18.5086	1.90985e-17	2.5242e-15	29.8592
ARHGEF6	1.36315	7.83033	10.2076	4.89406e-11	6.35762e-10	14.9166
PUS7	1.36256	7.53058	6.99793	1.17054e-07	5.66093e-07	7.02628
CNOT8	1.36183	7.43194	14.9142	5.18863e-15	2.74662e-13	24.2049
RFC2	1.36128	6.74677	11.1822	5.99412e-12	1.08285e-10	17.0503
CBLN3	1.36055	5.34226	9.9584	8.5348e-11	1.02668e-09	14.3516
KLRB1	1.36047	6.22007	5.09869	2.00764e-05	5.80091e-05	1.8565
VASH1	1.3595	5.27836	14.2946	1.51768e-14	6.57321e-13	23.118
ALPK2	1.3588	9.19334	7.32317	5.01377e-08	2.66785e-07	7.88358
FABP6	1.35872	4.34483	8.28494	4.40676e-09	3.1281e-08	10.347
FAM216A	1.35865	6.51573	6.61401	3.23318e-07	1.40146e-06	6.00045
AXL	1.35858	7.37906	11.4529	3.41512e-12	6.81893e-11	17.6218
KIAA1715	1.35799	6.65042	9.16707	5.26326e-10	4.90552e-09	12.5037
ICOS	1.3579	3.97058	8.03371	8.22335e-09	5.42207e-08	9.71446
PFKFB3	1.35788	9.40437	6.90435	1.49729e-07	7.07024e-07	6.77755
PLOD3	1.35677	9.05618	12.6505	3.13703e-13	9.10273e-12	20.0465
PDGFD	1.35413	6.57051	6.28893	7.732e-07	3.05316e-06	5.12164
UCN	1.35246	4.99404	10.1252	5.87746e-11	7.42328e-10	14.7306
PLA1A	1.35141	7.67573	4.962	2.92778e-05	8.15257e-05	1.48061
LOC100128988	1.35096	4.02616	6.24438	8.72e-07	3.39745e-06	5.00056
HLA-DQB2	1.35076	6.35265	5.0627	2.21732e-05	6.34325e-05	1.75747
BRCA1	1.3507	5.09972	17.3367	1.06702e-16	1.09294e-14	28.1279
FER1L4	1.34773	4.63954	16.1646	6.58851e-16	4.99897e-14	26.2914
TNFSF14	1.34559	4.9227	6.26643	8.21596e-07	3.22128e-06	5.06051
SMIM3	1.34516	8.14777	3.48367	0.0016141	0.00316516	-2.46089
CXorf21	1.34445	5.85755	11.1005	7.11576e-12	1.24699e-10	16.876
RGCC	1.3437	6.27665	6.51922	4.16478e-07	1.75663e-06	5.74509
BTN2A2	1.34317	4.94576	13.0028	1.60155e-13	5.11846e-12	20.7288
LOC100505812	1.34315	5.01959	9.01334	7.56622e-10	6.72801e-09	12.1351
CEBPB	1.34179	10.3474	5.36118	9.73482e-06	2.99216e-05	2.57926
FCRL3	1.33924	3.80702	6.71587	2.46549e-07	1.10304e-06	6.27398
SLC7A11	1.33911	3.75549	6.91329	1.46244e-07	6.92869e-07	6.80134
PSMB8-AS1	1.33876	5.91644	12.9985	1.61468e-13	5.1524e-12	20.7205
NUPR1	1.33832	8.7504	3.89621	0.000540443	0.00116751	-1.39785
ANKHD1	1.33798	4.15288	4.61956	7.52599e-05	0.000192818	0.542905
TMEM87B	1.33739	6.17842	8.88952	1.01584e-09	8.70365e-09	11.836
SNAP25	1.33713	5.0236	5.10907	1.95099e-05	5.64439e-05	1.88504
LOXL3	1.33698	6.40668	10.9351	1.00961e-11	1.68016e-10	16.5205
ZNF680	1.33692	6.03962	17.2265	1.26064e-16	1.24761e-14	27.9599
DNAH11	1.33612	3.92689	10.6984	1.67532e-11	2.57662e-10	16.0059
FPR1	1.33501	5.57775	8.54114	2.35237e-09	1.81577e-08	10.9838
ANKRD36C	1.33468	3.74024	17.9883	4.05209e-17	4.71654e-15	29.1028
NRARP	1.33453	7.24794	6.09981	1.28965e-06	4.84855e-06	4.60676
SHMT2	1.33433	8.31144	9.25178	4.31503e-10	4.1404e-09	12.7054
LOC153682	1.33401	4.92173	6.80041	1.97041e-07	9.02028e-07	6.50025
HVCN1	1.33398	7.12185	13.082	1.37935e-13	4.51395e-12	20.8803
FAM13A-AS1	1.33359	6.35694	10.5065	2.53849e-11	3.6648e-10	15.5837
NMI	1.33335	8.35877	8.16976	5.85996e-09	4.04205e-08	10.058
DOC2A	1.33067	5.7695	4.55062	9.09726e-05	0.000229713	0.35514
COL5A3	1.33046	5.99452	7.47171	3.41815e-08	1.89922e-07	8.27125
CYBB	1.33029	4.76648	9.64954	1.71922e-10	1.8744e-09	13.6401
BST2	1.32959	8.67356	6.78375	2.05925e-07	9.37672e-07	6.45572
C3orf67	1.32871	3.36037	7.27451	5.68734e-08	2.9936e-07	7.75606
LGALS9	1.32804	6.94797	8.64065	1.84768e-09	1.46485e-08	11.2289
KDM2B	1.32739	7.56263	9.80729	1.2004e-10	1.37612e-09	14.005
HOXA4	1.32691	6.94118	8.83986	1.14389e-09	9.61972e-09	11.7155
DIAPH2	1.32656	5.74232	12.8695	2.06228e-13	6.38186e-12	20.4722
FKBP11	1.32656	7.2149	6.78099	2.07436e-07	9.44342e-07	6.44834
LRRK2	1.32479	8.74318	6.08652	1.33701e-06	5.00641e-06	4.57049
CLU	1.32471	8.17707	6.20995	9.57028e-07	3.70338e-06	4.9069
DGKD	1.32461	7.46856	10.3727	3.40045e-11	4.65652e-10	15.2866
DOK3	1.3245	5.61076	11.0539	7.85078e-12	1.35152e-10	16.7761
RBM28	1.32342	6.97404	9.5578	2.12185e-10	2.25692e-09	13.4264
ABCA12	1.323	3.20071	4.52877	9.66022e-05	0.000242553	0.295725
CRLF3	1.32266	7.95014	10.2995	3.99451e-11	5.34148e-10	15.123
GIMAP6	1.32263	7.8694	10.4971	2.59062e-11	3.71649e-10	15.563
ASAP1-IT2	1.32218	5.0967	10.1815	5.18592e-11	6.67329e-10	14.8578
DENND5A	1.32102	8.51903	15.3519	2.48155e-15	1.48213e-13	24.9511
C12orf4	1.3201	6.36372	12.9887	1.64502e-13	5.24103e-12	20.7016
DUSP10	1.31951	5.47399	6.1697	1.06713e-06	4.0868e-06	4.79731
COL5A1	1.31798	6.37164	3.19243	0.00342074	0.00624464	-3.1824
GBP3	1.31769	8.85609	2.4098	0.0226387	0.0348495	-4.95235
BICD1	1.31753	6.0858	8.47353	2.77384e-09	2.09465e-08	10.8166
EMR1	1.3175	5.03649	8.90315	9.83309e-10	8.47458e-09	11.8691
RAP2B	1.31746	5.18635	11.0099	8.61523e-12	1.46223e-10	16.6817
CD84	1.31571	5.03523	11.2694	4.99638e-12	9.33053e-11	17.2353
PTPRE	1.31499	5.5761	12.6801	2.96308e-13	8.69652e-12	20.1044
BNIP3	1.31403	10.3526	8.70644	1.57616e-09	1.27575e-08	11.3902
ELOVL2	1.31305	3.78504	11.6732	2.17419e-12	4.67371e-11	18.0805
LOC374443	1.31301	3.94036	12.2268	7.16675e-13	1.81705e-11	19.2077
KIAA1586	1.31122	4.93777	9.92789	9.14103e-11	1.08433e-09	14.2819
PILRA	1.31118	6.2088	11.1851	5.95823e-12	1.07827e-10	17.0564
CYP2C19	1.31097	4.1644	19.0982	8.32031e-18	1.27201e-15	30.6936
SEMA4B	1.31063	8.12839	5.22318	1.42403e-05	4.22916e-05	2.1992
PSTPIP2	1.31034	5.6702	6.52078	4.14742e-07	1.75039e-06	5.7493
CFP	1.30926	4.75718	9.93811	8.93328e-11	1.06647e-09	14.3052
CDCA7	1.30888	4.01452	9.74502	1.38274e-10	1.55215e-09	13.8614
LOC284023	1.30822	5.71076	9.16233	5.32227e-10	4.94252e-09	12.4924
QPCT	1.3072	6.73283	2.80851	0.00888062	0.0149012	-4.08583
TMEM140	1.30623	8.72264	11.2921	4.76575e-12	9.03156e-11	17.2833
EYA1	1.30475	4.87637	3.51191	0.00149916	0.00295703	-2.38952
PTPN22	1.3043	3.49219	10.4244	3.03647e-11	4.23507e-10	15.4017
TAF5	1.30416	5.3032	12.5317	3.9468e-13	1.10156e-11	19.8134
DDX26B	1.30338	6.33096	7.8434	1.32629e-08	8.28978e-08	9.23002
MTHFD2	1.30175	5.81411	8.85821	1.09475e-09	9.25973e-09	11.7601
CARD16	1.301	4.9009	12.4953	4.23552e-13	1.17097e-11	19.7417
STK17B	1.29977	5.03232	8.34008	3.8471e-09	2.78487e-08	10.4848
CLIC1	1.29943	10.6285	10.6416	1.89356e-11	2.8777e-10	15.8815
AHRR	1.29907	4.37469	4.40014	0.000137493	0.000334801	-0.0531263
ABCC1	1.29906	6.62728	8.19062	5.56436e-09	3.86412e-08	10.1105
PCDHGC3	1.29897	4.02213	19.7769	3.2842e-18	5.954e-16	31.6256
NFKBIE	1.29827	7.08267	8.02801	8.34132e-09	5.48396e-08	9.70002
TXK	1.29822	4.53483	5.68123	4.03944e-06	1.35859e-05	3.46006
SEL1L3	1.29726	6.30709	11.6146	2.45042e-12	5.1254e-11	17.959
AGAP2-AS1	1.29708	5.24843	10.2529	4.42752e-11	5.83669e-10	15.0184
NCK1	1.29517	6.53215	11.0876	7.31179e-12	1.2748e-10	16.8484
ASAP1	1.29486	7.30232	11.1979	5.80124e-12	1.05452e-10	17.0835
FANCI	1.29483	4.5834	13.3084	9.03366e-14	3.1208e-12	21.3097
DTX3L	1.29445	8.75474	6.33692	6.79408e-07	2.72109e-06	5.25188
PARVG	1.29437	5.83433	9.61206	1.87331e-10	2.01926e-09	13.5529
LY9	1.29413	4.36146	11.1103	6.9718e-12	1.22596e-10	16.8968
GPCPD1	1.29395	6.6987	12.6328	3.24595e-13	9.36572e-12	20.0118
RBP7	1.29392	7.84685	4.31362	0.000174224	0.000415694	-0.286691
COL8A1	1.29291	4.58643	4.85022	3.98561e-05	0.000107987	1.17378
PCSK6	1.29185	4.67572	9.26956	4.13929e-10	4.00555e-09	12.7476
FLNA	1.29127	8.46201	8.18994	5.5738e-09	3.86919e-08	10.1088
SLCO2B1	1.28841	7.0827	7.58894	2.53107e-08	1.45978e-07	8.57543
TULP2	1.28655	4.02272	19.0409	9.01202e-18	1.3575e-15	30.6134
ENO1	1.28532	8.74985	13.1949	1.11627e-13	3.74883e-12	21.095
FBN1	1.28522	6.2275	3.9767	0.000435144	0.000958019	-1.18592
SRD5A3	1.2848	5.54177	6.92645	1.41259e-07	6.71736e-07	6.83637
CCDC91	1.28466	7.0685	3.80313	0.000693546	0.00146263	-1.64125
LOC100505498	1.28431	4.07865	3.64636	0.0010523	0.00214374	-2.04675
SPSB1	1.28369	6.35422	4.96171	2.93012e-05	8.15798e-05	1.47982
LXN	1.2835	8.30668	7.14715	7.92114e-08	3.99883e-07	7.42102
TPRG1	1.2834	3.94264	5.7598	3.25745e-06	1.12061e-05	3.67588
HEATR5B /// HEATR5B	1.28301	5.81955	14.0517	2.33432e-14	9.62192e-13	22.6818
CCND3	1.28223	7.22536	9.15825	5.37364e-10	4.98345e-09	12.4826
MMRN2	1.28199	6.20185	7.81902	1.41052e-08	8.74575e-08	9.16764
TRAF3IP3	1.28172	4.84098	7.5919	2.512e-08	1.4496e-07	8.58309
ANO4	1.2814	3.98731	7.47421	3.39622e-08	1.88806e-07	8.27777
PELI1	1.28122	7.49451	9.33726	3.53454e-10	3.50138e-09	12.908
TTC30A	1.28025	5.9697	10.7994	1.34854e-11	2.14989e-10	16.2264
CNRIP1	1.27876	7.42848	7.40388	4.07025e-08	2.22177e-07	8.09454
HAUS6	1.27876	5.34661	8.60882	1.99579e-09	1.56891e-08	11.1506
MZB1	1.27824	4.96866	4.28371	0.000189056	0.000447538	-0.367201
HLA-DRB4	1.27681	5.65714	2.43908	0.0211818	0.0328238	-4.89157
RNFT1	1.27587	5.75166	14.8174	6.1218e-15	3.15103e-13	24.0374
TNFSF8	1.27479	4.71734	12.2849	6.39234e-13	1.64721e-11	19.3238
CPNE2	1.27359	7.8936	12.635	3.23185e-13	9.35137e-12	20.0162
ABI3BP	1.27254	5.66621	5.74082	3.43111e-06	1.17463e-05	3.62377
KLRC3	1.27182	3.18517	9.81517	1.17915e-10	1.35633e-09	14.0232
VEGFC	1.27159	6.52052	6.53835	3.95703e-07	1.68147e-06	5.79669
NOG	1.27131	3.97085	3.02904	0.00516247	0.00909672	-3.57417
LINC00342	1.27101	6.63709	11.9401	1.26782e-12	2.98192e-11	18.6284
ZBTB2	1.26863	5.83203	15.4787	2.01056e-15	1.283e-13	25.164
PLAGL1	1.26769	8.43574	8.50257	2.58406e-09	1.97232e-08	10.8885
KCTD11	1.26641	5.9689	10.0311	7.25087e-11	8.91605e-10	14.5172
ZAK	1.26619	6.3121	8.84588	1.12752e-09	9.49772e-09	11.7302
PTRF	1.26589	7.58701	10.2956	4.02908e-11	5.37718e-10	15.1143
SPATA18	1.2648	6.64959	9.35414	3.39844e-10	3.39446e-09	12.9479
TTK	1.26396	3.55722	5.71885	3.64387e-06	1.23939e-05	3.56342
C3orf70	1.26338	4.75365	7.1114	8.69594e-08	4.345e-07	7.32667
PRDM1	1.26186	6.53698	9.95255	8.64766e-11	1.03721e-09	14.3382
APOBR	1.26127	5.27638	17.1941	1.32435e-16	1.29812e-14	27.9102
POU5F1B	1.26123	7.41957	9.61703	1.8521e-10	2.00358e-09	13.5645
SIPA1	1.26067	6.98344	9.2589	4.24376e-10	4.08734e-09	12.7223
PTGFRN	1.26034	6.61454	3.57729	0.00126269	0.00252909	-2.22345
LOC100132057	1.25914	4.53244	15.5011	1.93726e-15	1.26391e-13	25.2015
GFI1	1.25911	3.85474	8.09258	7.09987e-09	4.76254e-08	9.86338
DAPP1	1.25778	4.84292	13.1334	1.25256e-13	4.13203e-12	20.9782
ELK3	1.25768	6.66403	10.4538	2.84767e-11	4.02327e-10	15.4669
ATG16L2	1.25664	6.15835	12.4671	4.47497e-13	1.22559e-11	19.6858
SYBU	1.25561	6.18557	2.34132	0.0264105	0.0401072	-5.09258
CDKN3	1.25542	4.84734	6.3142	7.22281e-07	2.87369e-06	5.19025
STMN3	1.25482	5.98227	8.86347	1.08105e-09	9.17686e-09	11.7729
UBL7-AS1	1.25466	4.50879	17.0682	1.6044e-16	1.53588e-14	27.7168
SAMD3	1.25459	3.90064	9.89559	9.83115e-11	1.15416e-09	14.2079
ST8SIA1	1.25336	3.30872	5.73338	3.50175e-06	1.19701e-05	3.60332
TXLNB	1.25322	3.11771	6.67325	2.7613e-07	1.21809e-06	6.15963
SPRY1	1.25314	7.49626	6.17945	1.03935e-06	3.99176e-06	4.82386
VENTX	1.25109	4.97242	15.9221	9.73117e-16	7.04427e-14	25.8975
EIF4EBP1	1.25092	7.61051	8.61797	1.95203e-09	1.54101e-08	11.1731
SAMD9L	1.25081	6.37203	6.67456	2.75168e-07	1.21515e-06	6.16315
FAIM3	1.25057	5.6713	8.49607	2.62536e-09	1.99714e-08	10.8724
LOC101928429	1.24981	3.81662	6.52218	4.132e-07	1.74537e-06	5.75306
GRIN2A	1.24965	4.01465	3.27858	0.00274518	0.00512278	-2.97186
HIST1H4H	1.24933	4.78241	6.03514	1.53722e-06	5.67618e-06	4.43017
ANKRD36B	1.24926	7.84075	7.52667	2.96839e-08	1.67892e-07	8.41407
PALD1	1.2492	6.23452	9.1271	5.78239e-10	5.31917e-09	12.4082
DLEU2	1.2476	4.87561	11.5495	2.79987e-12	5.79962e-11	17.8236
DHRS9	1.24722	4.8354	7.54124	2.85966e-08	1.6264e-07	8.45184
C19orf10	1.24688	8.56239	10.6155	2.00344e-11	3.02004e-10	15.8242
MPZL2	1.24678	6.28255	7.0846	9.32717e-08	4.62543e-07	7.25583
LILRA1	1.24646	4.14974	21.0829	5.9214e-19	1.39432e-16	33.3389
IRF7	1.24595	7.25705	6.50013	4.38318e-07	1.84004e-06	5.69356
S100A4	1.24568	9.16562	5.54181	5.92232e-06	1.92152e-05	3.07661
SLFN12	1.24524	5.64503	6.67438	2.75299e-07	1.21547e-06	6.16267
RRN3	1.24248	7.71692	10.7243	1.58436e-11	2.46261e-10	16.0627
CCDC127	1.24221	6.6511	7.96085	9.86923e-09	6.38197e-08	9.52953
MMP12	1.24216	3.51093	4.08277	0.000326639	0.000737683	-0.904831
ANXA5	1.24188	10.9238	9.93783	8.93886e-11	1.06652e-09	14.3046
RBM3	1.24166	7.48916	9.00498	7.71781e-10	6.84743e-09	12.115
FAM101B	1.24164	8.13276	6.60131	3.34456e-07	1.44398e-06	5.96629
RPL3	1.24057	12.3517	19.0177	9.3083e-18	1.3919e-15	30.581
CORO1C	1.23974	8.48935	9.38227	3.18334e-10	3.21251e-09	13.0143
LOC613266	1.23902	3.93514	2.24768	0.0324942	0.048448	-5.27987
LILRB3	1.23865	7.15758	14.7718	6.61954e-15	3.38033e-13	23.9583
PXDN	1.23793	7.40355	4.20955	0.00023144	0.000538904	-0.566336
COL11A1	1.23698	3.3106	2.71105	0.0112267	0.0184362	-4.30503
VNN2	1.23571	6.18168	4.78174	4.81417e-05	0.000128149	0.986118
PCDHB11	1.23465	5.57921	14.5075	1.04552e-14	4.77027e-13	23.4955
CST3	1.23435	7.26569	7.08431	9.33423e-08	4.62669e-07	7.25506
RP2	1.23394	4.54736	20.0248	2.35485e-18	4.40038e-16	31.9588
CAPG	1.23366	8.63609	5.61668	4.8217e-06	1.59345e-05	3.2826
PCDHB12	1.23332	5.60075	14.765	6.69779e-15	3.40474e-13	23.9464
IGF2BP3	1.23228	3.4973	4.13218	0.000285651	0.00065238	-0.773204
H2BFS	1.232	7.13406	5.52438	6.21289e-06	2.00753e-05	3.02864
ZNF826P	1.23178	5.45517	6.53502	3.99241e-07	1.69369e-06	5.78771
TGFA	1.23094	6.35907	10.7851	1.39037e-11	2.20286e-10	16.1954
LINC01158	1.23089	8.35613	6.29621	7.58163e-07	3.00014e-06	5.14142
STK4	1.23061	5.16632	11.8803	1.42977e-12	3.28735e-11	18.5063
LOC340184	1.23026	3.35365	13.3881	7.79339e-14	2.77662e-12	21.4595
ERGIC1	1.22953	6.84538	15.3868	2.34149e-15	1.41082e-13	25.0099
HSPG2	1.22921	7.47007	7.89374	1.16823e-08	7.41738e-08	9.35861
CTSE	1.22877	4.67689	8.95272	8.73797e-10	7.63677e-09	11.989
RASGEF1A	1.22858	5.15286	6.104	1.27507e-06	4.80077e-06	4.6182
2016-09-01	1.22785	4.99901	8.04384	8.01796e-09	5.30542e-08	9.7401
MCM5	1.22762	6.57283	11.4633	3.34279e-12	6.71377e-11	17.6436
SH3BGRL3	1.22756	9.01318	8.63218	1.88597e-09	1.49116e-08	11.208
S100A11	1.22739	9.70489	6.11528	1.23666e-06	4.67162e-06	4.64897
SRGAP2	1.2256	5.19011	7.40976	4.009e-08	2.19301e-07	8.10988
FLI1	1.22486	5.15928	12.487	4.30459e-13	1.18527e-11	19.7253
ADCY7	1.22419	5.67748	8.76848	1.35751e-09	1.11866e-08	11.5417
CDKN1A	1.22182	9.12554	7.78974	1.5189e-08	9.33856e-08	9.09264
WDR52	1.2218	4.65796	8.49141	2.65542e-09	2.01702e-08	10.8608
RPS21	1.22098	9.86775	10.8857	1.12158e-11	1.83813e-10	16.4137
C10orf54	1.22089	6.30766	10.3446	3.61748e-11	4.91757e-10	15.2238
CENPW	1.22045	5.76958	5.14786	1.7529e-05	5.11027e-05	1.99183
TMEM71	1.21969	5.2743	6.52378	4.1143e-07	1.73964e-06	5.75739
CASP4	1.21945	6.71266	6.40022	5.73029e-07	2.33893e-06	5.42344
TMC8	1.21736	5.51945	10.448	2.88375e-11	4.06024e-10	15.4541
MYOT	1.21703	4.00008	3.71768	0.000870944	0.00180242	-1.86299
MX1	1.21684	7.99816	5.80316	2.89312e-06	1.00626e-05	3.79491
LOC285812	1.21678	5.88648	5.01031	2.56229e-05	7.2242e-05	1.61339
ID3	1.2147	8.77872	5.28467	1.20195e-05	3.62905e-05	2.36855
KIF2C	1.21403	4.83007	6.6844	2.68061e-07	1.18735e-06	6.18955
ARHGDIB	1.21338	8.4816	11.4965	3.12212e-12	6.34522e-11	17.713
IL15RA	1.21317	6.95124	10.4729	2.73111e-11	3.88809e-10	15.5093
ND6	1.21315	8.11653	5.38381	9.14663e-06	2.83091e-05	2.64158
ZC3H12D	1.21277	5.37886	8.42706	3.10762e-09	2.31248e-08	10.7013
NCK1-AS1	1.2115	5.8923	7.75554	1.65635e-08	1.00898e-07	9.00488
TMEM92	1.21091	5.09598	7.45891	3.5325e-08	1.95692e-07	8.23795
TAF1A	1.21071	4.30418	6.95711	1.30308e-07	6.23713e-07	6.9179
PTTG1	1.21027	7.03593	6.92052	1.43485e-07	6.81528e-07	6.82058
SH2D2A	1.20879	5.96141	8.12822	6.49697e-09	4.4101e-08	9.95335
DCK	1.20868	7.57697	9.35321	3.4058e-10	3.40016e-09	12.9457
ISG15	1.20836	8.1005	7.51105	3.0897e-08	1.73843e-07	8.37352
STAT4	1.20771	5.9221	7.10028	8.95239e-08	4.45949e-07	7.29729
TTC39C	1.20728	4.69224	6.65416	2.90517e-07	1.27551e-06	6.10838
SIPA1L2	1.20721	6.37916	9.51485	2.34237e-10	2.46081e-09	13.3259
PTPRN	1.20658	3.88048	8.68563	1.65735e-09	1.32834e-08	11.3392
SERPINH1	1.20501	8.1909	5.73283	3.50702e-06	1.19861e-05	3.60182
SHC1	1.205	8.3327	6.08841	1.33017e-06	4.98444e-06	4.57564
IFFO1	1.20438	7.59103	11.1777	6.0513e-12	1.09126e-10	17.0406
CD47	1.20359	6.89906	10.7741	1.42373e-11	2.25224e-10	16.1713
SLAMF6	1.20336	5.2193	8.37154	3.56087e-09	2.60529e-08	10.5632
CREB5	1.20168	6.33366	3.37973	0.00211523	0.00405242	-2.72151
CGREF1	1.20137	5.35225	6.39356	5.83373e-07	2.37594e-06	5.40542
FCGR2A	1.20126	5.17812	9.11772	5.91169e-10	5.41939e-09	12.3857
PALMD	1.20125	4.69074	9.6532	1.7049e-10	1.86077e-09	13.6486
FBLN2	1.20029	5.54314	6.69609	2.59855e-07	1.1555e-06	6.22093
TAPBPL	1.19855	7.62451	6.4684	4.77209e-07	1.98944e-06	5.60786
SNRNP200	1.19846	6.84158	7.72642	1.78332e-08	1.07545e-07	8.93006
CXCL5	1.19802	3.04914	2.89124	0.00725912	0.0124122	-3.89635
ZHX2	1.19799	6.63873	7.95668	9.97307e-09	6.44506e-08	9.51892
FMNL3	1.1977	5.12172	9.73819	1.4044e-10	1.5713e-09	13.8456
ALOX15B	1.19726	4.39311	8.62996	1.89614e-09	1.49863e-08	11.2026
TWIST1	1.19719	3.95049	7.81359	1.43e-08	8.85848e-08	9.15374
CATSPER3	1.19672	4.54242	6.49114	4.49e-07	1.88295e-06	5.66928
BTLA	1.19583	3.91694	11.6222	2.41291e-12	5.06463e-11	17.9747
TUBA1B	1.19424	10.3602	11.2722	4.96747e-12	9.29648e-11	17.2411
ESAM	1.1927	7.56377	5.77698	3.10784e-06	1.07292e-05	3.72306
RAD54B	1.19258	5.84919	5.47445	7.12715e-06	2.26684e-05	2.89119
HENMT1	1.19235	6.17166	6.49691	4.42118e-07	1.85523e-06	5.68486
ZNF532	1.19125	7.06319	7.32488	4.99151e-08	2.65945e-07	7.88808
AEN	1.19123	6.58262	15.0264	4.28749e-15	2.35479e-13	24.3979
IGLC1	1.19052	5.64991	4.15486	0.000268581	0.000616901	-0.712666
KCTD3	1.19026	8.07159	7.14011	8.06804e-08	4.06697e-07	7.40244
LOC102723479	1.18994	4.39669	6.96006	1.29302e-07	6.19329e-07	6.92573
COLGALT1	1.18868	6.77187	11.3716	4.04004e-12	7.83752e-11	17.4511
LOC100129406	1.18855	5.64108	6.61323	3.2399e-07	1.40352e-06	5.99836
CARD6	1.18807	6.66434	6.70419	2.54323e-07	1.13385e-06	6.24265
KCNS3	1.18789	6.65257	4.65445	6.83687e-05	0.000176754	0.638077
CD80	1.18751	4.01107	9.67261	1.63092e-10	1.7934e-09	13.6937
RNF145	1.18695	6.42318	10.0989	6.23129e-11	7.82675e-10	14.6712
NMB	1.18596	7.63157	4.82304	4.29588e-05	0.000115675	1.09928
TNRC6C-AS1	1.18585	5.17204	14.8578	5.71305e-15	2.99329e-13	24.1074
LRRC66	1.18547	4.43128	6.09584	1.30362e-06	4.89657e-06	4.59593
LINC00260	1.18443	4.53288	8.8591	1.09242e-09	9.25014e-09	11.7623
P2RX5	1.1842	5.22384	10.7832	1.39608e-11	2.21021e-10	16.1912
BDNF	1.18349	4.19671	4.75291	5.21241e-05	0.000137907	0.907202
ADRB2	1.18289	5.27472	5.02431	2.46516e-05	6.98014e-05	1.65189
EXOC3	1.18161	7.57862	4.37984	0.000145353	0.000352142	-0.108002
SEMA3F	1.1813	6.6888	13.0333	1.51208e-13	4.8936e-12	20.7871
CCNE2	1.18098	3.37142	10.1622	5.41337e-11	6.90359e-10	14.8142
MEDAG	1.18074	4.88842	14.1048	2.12363e-14	8.89047e-13	22.7776
HAMP	1.18051	5.38214	5.49978	6.64769e-06	2.13255e-05	2.96091
PIK3AP1	1.18008	6.80016	6.45311	4.97178e-07	2.05969e-06	5.56654
ANP32A-IT1	1.17976	4.10901	6.94496	1.34544e-07	6.42037e-07	6.88558
ARHGAP25	1.17957	5.52329	13.822	3.52567e-14	1.38631e-12	22.2638
LDLRAD4	1.1785	5.69325	10.4308	2.99411e-11	4.1897e-10	15.4159
ADPRH	1.17786	5.2152	14.7464	6.91495e-15	3.48058e-13	23.9141
RARS	1.17765	9.01936	14.5984	8.9273e-15	4.16003e-13	23.6555
IKZF1	1.1767	4.63425	12.5273	3.98067e-13	1.1095e-11	19.8047
ADAMTS5	1.17662	6.40218	4.80634	4.4984e-05	0.000120668	1.0535
GPR176	1.17601	5.31467	10.0038	7.70712e-11	9.3981e-10	14.4552
CEBPD	1.17596	8.81996	6.50722	4.30077e-07	1.80989e-06	5.7127
RIT1	1.17547	7.55411	9.13832	5.63167e-10	5.20155e-09	12.435
SLC16A14	1.17457	5.39159	6.30245	7.45516e-07	2.95466e-06	5.15836
EGR2	1.17412	6.77893	2.30385	0.0287087	0.0432478	-5.16816
CENPF	1.17364	4.03963	9.66304	1.66696e-10	1.82617e-09	13.6715
LPAR2	1.17273	5.7079	14.7435	6.94916e-15	3.48923e-13	23.9091
APAF1	1.17226	4.97418	18.7905	1.28022e-17	1.79634e-15	30.261
HNRNPU-AS1	1.172	8.09656	7.64127	2.21462e-08	1.29673e-07	8.71068
LINC00925	1.17167	4.16338	6.37514	6.13001e-07	2.4774e-06	5.3555
GIMAP1	1.17143	6.17908	9.26349	4.19838e-10	4.05316e-09	12.7332
FBXO17	1.17052	8.0191	5.16986	1.64968e-05	4.83759e-05	2.05238
NLRP11	1.17042	4.02754	8.14091	6.29516e-09	4.30306e-08	9.98535
LOC153577	1.17035	3.38722	10.0465	7.00566e-11	8.65608e-10	14.5522
SDS	1.17028	5.76757	8.68584	1.65651e-09	1.32834e-08	11.3397
MGAT1	1.16902	7.96425	10.9967	8.8598e-12	1.50126e-10	16.6533
FAS	1.16886	7.43191	6.61239	3.24718e-07	1.40614e-06	5.99609
PTPRK	1.16876	7.2569	8.55709	2.26287e-09	1.75595e-08	11.0232
TMEM100	1.16874	4.74276	2.85932	0.00784851	0.0133243	-3.96982
SKA3	1.16716	4.76476	15.4793	2.00833e-15	1.283e-13	25.1651
CD99	1.1662	9.59882	9.69166	1.56148e-10	1.72911e-09	13.7379
IL27RA	1.16546	4.92934	8.24515	4.86175e-09	3.41556e-08	10.2474
PDK4	1.16535	8.58971	2.32389	0.027458	0.04155	-5.12784
PROS1	1.1641	10.1049	5.47878	7.0428e-06	2.24209e-05	2.90311
TRPV2	1.16388	5.12715	15.5801	1.7007e-15	1.12027e-13	25.3332
SP5	1.1636	4.8121	4.94557	3.06352e-05	8.49362e-05	1.4355
FANCG	1.16322	6.61231	10.1687	5.3349e-11	6.83068e-10	14.829
RINT1	1.16316	6.90157	10.9633	9.50881e-12	1.59278e-10	16.5814
HAUS2	1.16252	6.36079	15.5262	1.85863e-15	1.21648e-13	25.2434
LIF	1.16205	6.62275	3.0413	0.00500685	0.00884608	-3.54513
TESPA1	1.16201	4.13258	12.3694	5.41558e-13	1.43896e-11	19.4922
PIK3R6	1.16166	4.52705	9.50483	2.39712e-10	2.50804e-09	13.3025
DAGLB	1.16152	5.54377	12.8363	2.19687e-13	6.70718e-12	20.408
PLEKHG4	1.16138	5.97449	5.66651	4.20578e-06	1.41014e-05	3.4196
CSF3R	1.16096	6.50535	11.1794	6.02944e-12	1.08827e-10	17.0443
LOC153684	1.16086	6.39208	9.08108	6.44551e-10	5.85296e-09	12.2979
JUN	1.15889	8.40464	4.69933	6.04183e-05	0.000157854	0.760667
C1orf216	1.1586	6.1696	7.45363	3.58077e-08	1.98044e-07	8.22421
CCM2	1.15849	7.4205	10.5465	2.32659e-11	3.40203e-10	15.6722
TNFSF4	1.15845	4.89854	8.53647	2.37926e-09	1.83239e-08	10.9723
PPT1	1.15757	10.5349	15.3689	2.41227e-15	1.4492e-13	24.9798
GINS3	1.15698	4.42791	10.0721	6.61529e-11	8.23334e-10	14.6104
PFKP	1.1562	7.63923	13.9437	2.83195e-14	1.13755e-12	22.4859
SQRDL	1.15575	10.0395	11.8789	1.43386e-12	3.29305e-11	18.5034
RHOJ	1.1556	5.29287	8.07763	7.36942e-09	4.91439e-08	9.82561
FGA	1.15464	4.67113	2.54296	0.0166792	0.0263915	-4.6721
LOC283588	1.15439	3.53808	9.44037	2.78214e-10	2.85545e-09	13.1512
LURAP1L	1.15389	6.16353	4.2932	0.000184221	0.000437307	-0.341681
VKORC1	1.15243	9.5377	10.5874	2.1294e-11	3.16566e-10	15.7622
NELL2	1.15167	5.60792	4.46347	0.000115574	0.000285776	0.118411
PTAFR	1.15119	6.45181	10.6015	2.06532e-11	3.09511e-10	15.7933
AGBL3	1.15071	3.66511	12.8303	2.22207e-13	6.77243e-12	20.3965
SYTL1	1.15029	5.50679	6.38358	5.99235e-07	2.43204e-06	5.37839
ZC3HAV1L	1.15009	5.3884	12.6266	3.28487e-13	9.45137e-12	19.9997
PRKCB	1.15003	4.65812	11.3746	4.0148e-12	7.81817e-11	17.4575
ZNF831	1.14915	3.31659	10.2591	4.36743e-11	5.77606e-10	15.0323
HCST	1.14908	6.69405	9.61696	1.85238e-10	2.00358e-09	13.5643
HRASLS	1.14874	3.98544	3.89807	0.000537751	0.00116231	-1.39297
BC033323 /// CEP290	1.14873	4.85969	11.4551	3.39943e-12	6.79422e-11	17.6265
NCEH1	1.14829	8.18126	5.0226	2.47679e-05	7.01017e-05	1.6472
KLF10	1.14822	9.46621	6.07524	1.37858e-06	5.1442e-06	4.53969
RFC4	1.14764	7.15265	7.23261	6.34089e-08	3.28776e-07	7.64604
GPR132	1.14752	4.15919	17.5335	7.9393e-17	8.38373e-15	28.4257
FAM185A	1.14731	5.32276	18.0972	3.45634e-17	4.11667e-15	29.2628
FAM110C	1.14639	8.92485	4.32525	0.00016877	0.000403717	-0.255342
CES4A	1.1462	6.87067	5.92901	2.052e-06	7.37367e-06	4.13988
GPSM2	1.14619	4.99526	9.65115	1.71292e-10	1.86852e-09	13.6438
IL4R	1.14584	7.55083	9.41197	2.97135e-10	3.02239e-09	13.0843
C1orf112	1.14537	3.93306	7.48628	3.2925e-08	1.83738e-07	8.30916
HSF4	1.14512	7.19612	5.78884	3.00871e-06	1.04186e-05	3.75559
AREG	1.14419	3.73752	5.95119	1.93168e-06	6.98173e-06	4.20059
PRR7	1.14375	4.63893	12.6587	3.08744e-13	8.98429e-12	20.0626
CCDC112	1.14373	3.84971	9.04873	6.95793e-10	6.24902e-09	12.2202
LINC01116	1.1435	7.70524	3.81114	0.000678847	0.00143532	-1.62037
POLE2	1.14319	5.02485	6.36242	6.34327e-07	2.55653e-06	5.32105
NRP2	1.14312	4.8196	8.68579	1.6567e-09	1.32834e-08	11.3396
AP1S3	1.14312	4.14196	6.29668	7.57222e-07	2.99758e-06	5.14267
DGCR9	1.14307	5.35838	8.29135	4.33763e-09	3.08973e-08	10.363
CNTRL	1.14287	5.17374	13.4034	7.57574e-14	2.71798e-12	21.4882
RND3	1.14253	8.69255	4.27016	0.000196181	0.000463069	-0.403647
PMP22	1.14185	5.19174	8.30928	4.15014e-09	2.96753e-08	10.4079
N4BP2L2-IT2	1.14167	3.96162	9.8481	1.09444e-10	1.26814e-09	14.0989
EGFR	1.14075	6.3845	9.59787	1.93528e-10	2.0768e-09	13.5199
KLRD1	1.14065	4.29843	17.8263	5.14087e-17	5.72369e-15	28.8633
BRCA2	1.14029	3.23943	14.3801	1.30607e-14	5.81906e-13	23.2701
RPS3	1.13974	12.151	11.2639	5.05322e-12	9.40239e-11	17.2238
TNAP	1.13957	4.94068	18.1694	3.11225e-17	3.75045e-15	29.3682
LOC100506699	1.13942	3.36947	18.6308	1.60476e-17	2.19168e-15	30.034
LIMS1	1.13929	4.89927	8.68456	1.66161e-09	1.33072e-08	11.3366
CIB4	1.13763	3.60113	9.86519	1.05296e-10	1.22284e-09	14.1382
SERTAD2	1.13694	8.39907	9.44937	2.72475e-10	2.80358e-09	13.1723
TPK1	1.13647	6.56319	8.54931	2.30607e-09	1.78474e-08	11.004
MILR1	1.13622	5.11439	5.72154	3.61706e-06	1.23211e-05	3.57083
RDM1	1.13615	3.87005	15.4149	2.23494e-15	1.36671e-13	25.057
LHX8	1.13594	2.90007	4.38253	0.000144287	0.000349683	-0.100737
CYTL1	1.13486	4.69139	5.45331	7.55391e-06	2.38369e-05	2.83299
BLM	1.13475	4.93845	11.6347	2.35171e-12	4.97267e-11	18.0008
ITPRIP	1.13463	6.57382	7.08377	9.34732e-08	4.63094e-07	7.25365
RPGRIP1L	1.13456	4.24846	14.3067	1.48579e-14	6.4624e-13	23.1395
ARNTL2	1.13427	4.34767	8.0305	8.28956e-09	5.4622e-08	9.70633
EFNA3	1.13398	6.26378	12.2214	7.24437e-13	1.83446e-11	19.1967
SND1	1.1339	8.52722	15.7987	1.18884e-15	8.42719e-14	25.6951
EPSTI1	1.13365	7.14913	5.57099	5.46611e-06	1.78651e-05	3.1569
PANX1	1.13344	5.95607	6.23908	8.84567e-07	3.44314e-06	4.98616
CPNE5	1.13313	4.69896	6.6774	2.73093e-07	1.20729e-06	6.17079
TFPI	1.13226	7.10904	3.49066	0.0015849	0.00311147	-2.44325
TCERG1	1.13134	5.61133	14.6351	8.37805e-15	3.96381e-13	23.7198
LINC00163	1.13085	4.43257	20.0953	2.14387e-18	4.06661e-16	32.0527
CAMLG	1.13085	9.27339	8.9882	8.03139e-10	7.10717e-09	12.0746
HTATSF1P2	1.13079	3.16849	4.8072	4.48777e-05	0.000120446	1.05586
LAT	1.13039	6.4546	7.19791	6.93978e-08	3.55332e-07	7.55476
TEX15	1.12961	3.44155	3.70064	0.000911285	0.00187876	-1.90701
HEY2	1.12926	6.07302	6.00557	1.66592e-06	6.11396e-06	4.34934
MIR4435-1HG /// RP11-181E10.3	1.12845	3.86351	12.3595	5.52146e-13	1.46329e-11	19.4725
CAMK1D	1.12832	5.55707	9.21302	4.72507e-10	4.47931e-09	12.6132
MALL	1.12831	7.14386	6.58852	3.46071e-07	1.48816e-06	5.93185
DOPEY2	1.12775	4.64393	8.8571	1.09765e-09	9.28042e-09	11.7574
RASSF3	1.12752	6.54361	7.85717	1.28101e-08	8.04007e-08	9.26522
PCDHB2	1.12698	4.69197	3.40655	0.00197314	0.00379903	-2.65457
CLDN1	1.12522	6.05253	3.84846	0.00061432	0.00131093	-1.52295
TRPC1	1.12486	5.58886	8.45195	2.92405e-09	2.19181e-08	10.7631
MT3	1.12486	6.00243	3.49725	0.00155779	0.0030625	-2.42659
CD163L1	1.12478	5.78468	4.15781	0.000266435	0.00061266	-0.704784
NFATC2	1.12458	5.38942	11.5398	2.856e-12	5.88612e-11	17.8035
SIGLEC7	1.12316	5.9093	13.4981	6.3628e-14	2.33898e-12	21.6652
IGHM	1.1222	6.30122	3.69859	0.000916257	0.0018878	-1.9123
EPDR1	1.12087	8.612	7.12367	8.42175e-08	4.22035e-07	7.35906
NAP1L1	1.12072	9.21873	8.09946	6.97913e-09	4.69693e-08	9.88077
ETS1	1.11917	6.31537	9.04013	7.10096e-10	6.35336e-09	12.1996
PPP1R13L	1.11858	6.74546	9.47268	2.58183e-10	2.67533e-09	13.2271
ANXA2	1.11803	9.22191	6.79056	2.02242e-07	9.22153e-07	6.47394
BTK	1.11803	5.92609	6.90902	1.47897e-07	6.99081e-07	6.78999
ECSCR	1.11791	7.05964	6.79039	2.02336e-07	9.22353e-07	6.47348
TMEM133	1.11729	7.37932	4.53026	9.62098e-05	0.000241657	0.299752
HES4	1.11655	6.62995	5.6933	3.90799e-06	1.31893e-05	3.49324
KLF6	1.11642	9.23143	4.41542	0.000131853	0.000322102	-0.0117711
CASP3	1.1162	6.80868	7.67625	2.02584e-08	1.19808e-07	8.80091
C11orf45	1.11613	3.89319	7.34009	4.79903e-08	2.57364e-07	7.92787
LGALS12	1.11566	4.85499	5.71729	3.65949e-06	1.24387e-05	3.55913
MKI67	1.11445	4.68273	12.2892	6.33852e-13	1.6354e-11	19.3324
NUDT17	1.11295	5.27215	12.2117	7.38386e-13	1.85549e-11	19.1774
TAF1D	1.11282	7.20818	6.10037	1.28768e-06	4.84205e-06	4.6083
CCR2	1.11271	4.66306	4.93903	3.11933e-05	8.63315e-05	1.41753
LINC00621	1.11265	9.14675	3.32556	0.00243294	0.00460256	-2.85601
ME2	1.11141	7.75222	9.92957	9.10654e-11	1.08211e-09	14.2857
SOAT1	1.11015	7.21962	7.19444	7.00281e-08	3.57933e-07	7.54562
NOD1	1.10992	6.16804	11.6644	2.21386e-12	4.73415e-11	18.0622
CXorf38	1.10969	7.04263	9.7943	1.23629e-10	1.41332e-09	13.9751
SOX17	1.10853	5.02185	6.64631	2.96654e-07	1.29884e-06	6.08729
GUCY1B3	1.10839	7.97409	6.31723	7.16403e-07	2.85252e-06	5.19848
CASP5	1.10761	4.77762	15.409	2.25673e-15	1.36915e-13	25.0472
POLR3GL	1.10675	8.07487	12.9523	1.76212e-13	5.57079e-12	20.6318
PRKCH	1.10668	5.97787	12.701	2.84629e-13	8.40188e-12	20.1452
CCDC88A	1.10541	4.11124	15.2208	3.08958e-15	1.77292e-13	24.7295
ZCCHC18	1.10534	4.16122	16.8729	2.16583e-16	2.01678e-14	27.4143
ITIH5	1.10519	7.45048	5.42384	8.19206e-06	2.56492e-05	2.75184
RPL22L1	1.10291	8.04616	7.60064	2.45653e-08	1.42079e-07	8.6057
FBXL16	1.10258	5.72733	3.90446	0.000528595	0.00114421	-1.37619
LOC727820	1.10243	6.09731	7.76467	1.61847e-08	9.89139e-08	9.02832
PARP9	1.101	6.8484	9.14918	5.48943e-10	5.08289e-09	12.461
LINC00839	1.10093	7.10437	3.8382	0.000631439	0.00134522	-1.54977
CARD8	1.10029	5.5738	15.4396	2.14489e-15	1.33964e-13	25.0986
CASS4	1.09992	3.42065	11.8956	1.38631e-12	3.20904e-11	18.5376
NT5C3A	1.09963	8.64416	7.49549	3.21558e-08	1.79984e-07	8.33309
A1BG	1.09915	4.52331	16.9432	1.94351e-16	1.83478e-14	27.5235
BARD1	1.09868	4.88995	10.4034	3.17928e-11	4.39182e-10	15.355
KIF20B	1.09815	5.37826	18.3797	2.29727e-17	2.9231e-15	29.6735
KIAA0922	1.09808	6.47186	8.80922	1.231e-09	1.02764e-08	11.641
FAM64A	1.09803	4.72844	7.89731	1.15779e-08	7.35912e-08	9.36771
BMP2	1.09673	6.77543	3.56998	0.00128722	0.00257394	-2.24208
PGM2	1.09571	6.74943	9.16312	5.31245e-10	4.93564e-09	12.4942
C1QL1	1.09367	4.89259	4.78374	4.78774e-05	0.000127561	0.991585
NR1H4	1.09324	7.13166	7.28707	5.50512e-08	2.90814e-07	7.789
HELLS	1.0932	4.03767	11.0693	7.60055e-12	1.31612e-10	16.809
GIT2	1.09287	5.46791	12.6337	3.24021e-13	9.36232e-12	20.0136
DNASE2	1.09269	7.58216	11.0566	7.806e-12	1.34608e-10	16.7819
SLC25A43	1.09203	7.30124	8.9203	9.43912e-10	8.17279e-09	11.9106
SPAG17	1.09156	5.38754	5.40371	8.65885e-06	2.69705e-05	2.6964
ADAMTSL4	1.09109	4.65023	5.75158	3.33158e-06	1.14285e-05	3.6533
TLR6	1.09093	4.1685	12.0395	1.03921e-12	2.50758e-11	18.8303
CMC4	1.09079	8.44022	8.59827	2.04751e-09	1.60587e-08	11.1246
C1orf167	1.09038	4.76068	16.5824	3.40176e-16	2.89163e-14	26.9588
CLIP2	1.09008	6.0938	8.42143	3.15081e-09	2.33867e-08	10.6873
TAPBP	1.08892	6.99455	8.85105	1.11366e-09	9.40025e-09	11.7427
HIST1H2BE	1.08841	6.34555	6.3076	7.35241e-07	2.91902e-06	5.17234
ICAM2	1.08775	7.83395	8.10804	6.83153e-09	4.61122e-08	9.90245
AP1S2	1.08773	7.49126	8.29577	4.29058e-09	3.05834e-08	10.3741
ELF4	1.08755	6.64904	9.07808	6.49133e-10	5.88413e-09	12.2907
LOC643733	1.08735	4.01071	10.6461	1.87512e-11	2.8518e-10	15.8914
ST3GAL5	1.08688	6.72332	9.55813	2.12022e-10	2.25635e-09	13.4271
LOC101927841	1.08634	3.34485	5.55691	5.68174e-06	1.84961e-05	3.11814
KATNAL1	1.08577	5.82419	12.3501	5.62323e-13	1.48834e-11	19.454
RARRES3	1.08491	9.18707	3.26822	0.00281909	0.00524589	-2.99732
PSD4	1.08415	5.48781	10.6163	2.00015e-11	3.01731e-10	15.8259
PSRC1	1.08284	5.04438	7.50125	3.1684e-08	1.77587e-07	8.34805
CSF1R	1.08225	8.15919	4.97402	2.8322e-05	7.91439e-05	1.51366
CDC20	1.08206	4.97593	5.4597	7.42233e-06	2.34687e-05	2.85057
CDCA3	1.08182	5.13878	7.9183	1.09823e-08	7.01977e-08	9.42123
CIR1	1.08172	6.66742	17.2662	1.18704e-16	1.18623e-14	28.0205
FAR2	1.08155	4.50782	9.41925	2.92161e-10	2.98068e-09	13.1015
PDGFRB	1.08137	7.63269	4.7295	5.55978e-05	0.000146266	0.843166
LOC101927809	1.08134	3.7095	3.99173	0.000417848	0.000923911	-1.14621
SYTL3	1.08109	4.36163	8.81313	1.21952e-09	1.01888e-08	11.6505
PI3	1.08105	4.1479	2.8941	0.00720836	0.0123357	-3.88974
FDXR	1.08048	6.01807	10.0203	7.42893e-11	9.09677e-10	14.4926
AL832909 /// LINC00984	1.07891	6.73292	6.73669	2.33293e-07	1.04858e-06	6.32976
NPM1	1.07749	11.1017	12.8618	2.09277e-13	6.4567e-12	20.4573
LOC100506022	1.07738	4.75212	3.30197	0.0025852	0.00485164	-2.91428
REG1B	1.07578	4.71765	2.6838	0.0119796	0.0195674	-4.36549
SCGN	1.07547	5.8455	2.73283	0.0106568	0.0175665	-4.25643
MATR3	1.07486	5.00878	5.29015	1.18393e-05	3.57993e-05	2.38364
ZNF558	1.07447	7.42992	8.5782	2.14972e-09	1.67768e-08	11.0752
DDX11	1.07425	6.30575	10.3136	3.87304e-11	5.20966e-10	15.1544
NAF1	1.07374	5.73652	10.848	1.21532e-11	1.9666e-10	16.3321
CDC45	1.0737	4.85996	11.2556	5.142e-12	9.53295e-11	17.2061
SMKR1	1.07332	3.97534	3.80543	0.00068929	0.001455	-1.63525
PLEKHG1	1.0732	6.30067	6.91259	1.46512e-07	6.93816e-07	6.79949
MR1	1.07314	6.02592	8.95946	8.59888e-10	7.53128e-09	12.0052
NGF	1.07236	5.44644	6.43229	5.25736e-07	2.16618e-06	5.51025
CYSLTR1	1.07233	3.89091	9.25383	4.29438e-10	4.12445e-09	12.7103
MEGF6	1.07061	5.71039	6.37708	6.09806e-07	2.46595e-06	5.36077
LILRA2	1.06981	5.0815	14.8375	5.91474e-15	3.07536e-13	24.0723
MSH2	1.06981	6.55212	8.41594	3.19347e-09	2.3652e-08	10.6737
DLEU7-AS1	1.06921	3.88529	12.9445	1.78828e-13	5.64478e-12	20.6169
IGFBP1	1.06902	4.19893	2.85092	0.00801093	0.0135731	-3.98908
HSD3B7	1.06858	8.19075	6.62469	3.14245e-07	1.36796e-06	6.02917
TTC9C	1.06817	6.06381	8.38997	3.40335e-09	2.50705e-08	10.6091
OASL	1.06631	5.56628	8.33542	3.89145e-09	2.81219e-08	10.4731
LOC101929787	1.06627	6.48918	8.29711	4.27647e-09	3.04935e-08	10.3774
ASAP1-IT1	1.06621	5.82268	9.50755	2.38212e-10	2.4949e-09	13.3088
BZRAP1-AS1	1.06614	4.09548	7.2111	6.70558e-08	3.44806e-07	7.58948
SIDT1	1.0661	5.1594	6.07829	1.36722e-06	5.10644e-06	4.54802
VMP1	1.06587	8.39752	3.77363	0.000750378	0.00157196	-1.71798
SPAG1	1.06582	5.87364	5.77279	3.14371e-06	1.08403e-05	3.71154
MPZL1	1.06548	6.34685	6.59953	3.36053e-07	1.44965e-06	5.96148
RAPGEF6	1.06506	5.42206	8.31435	4.09859e-09	2.93374e-08	10.4205
NUP85	1.06457	7.47534	8.89174	1.01046e-09	8.66844e-09	11.8414
BID	1.0628	6.63016	6.62523	3.13789e-07	1.36627e-06	6.03063
LINC01315	1.06276	6.03681	6.22704	9.1381e-07	3.54753e-06	4.95342
LOC100291323	1.06172	5.56925	4.93176	3.18254e-05	8.7974e-05	1.39757
LPGAT1	1.06155	7.37273	7.82796	1.37899e-08	8.57101e-08	9.19054
OAS3	1.06137	5.49909	11.8221	1.60766e-12	3.63515e-11	18.3872
DDX41	1.05945	8.57216	8.82282	1.19153e-09	9.97942e-09	11.6741
TMEM123	1.05944	10.2395	10.0169	7.48419e-11	9.15897e-10	14.485
ADAM17	1.05884	6.37541	11.1044	7.05764e-12	1.23787e-10	16.8843
INTU	1.05828	5.42516	5.77031	3.16506e-06	1.09065e-05	3.70475
COL3A1	1.05765	8.33458	2.32935	0.0271262	0.0410904	-5.11682
SELM	1.05743	8.41229	5.0993	2.0043e-05	5.79289e-05	1.85816
IL12RB1	1.05716	5.26611	11.5181	2.986e-12	6.1049e-11	17.7582
AKR1B1	1.05638	10.2955	5.39283	8.92224e-06	2.76773e-05	2.66643
SNAI3	1.05611	3.49134	9.26663	4.16773e-10	4.02927e-09	12.7407
HAUS7	1.05518	7.79139	3.16257	0.00369003	0.00668381	-3.25474
WDR13	1.05436	7.44104	7.14087	8.05188e-08	4.06083e-07	7.40446
SLFN5	1.05382	5.87384	9.38972	3.1287e-10	3.16673e-09	13.0319
PKI55	1.05379	5.52535	12.4133	4.96997e-13	1.33265e-11	19.5793
CLEC1B	1.05276	3.68054	15.637	1.5487e-15	1.04364e-13	25.4279
GNA13	1.05272	7.11592	12.3216	5.94678e-13	1.5578e-11	19.3971
EFNA1	1.05269	8.83287	4.18133	0.00024992	0.000577666	-0.641885
SARAF	1.05257	11.5977	10.9469	9.84692e-12	1.64137e-10	16.5459
MXI1	1.05256	10.7094	7.69986	1.9078e-08	1.13597e-07	8.86171
CXCR6	1.05251	5.53687	6.42072	5.42328e-07	2.22782e-06	5.47893
CLGN	1.05249	3.28643	2.38686	0.0238434	0.0365474	-4.99962
C9orf91	1.05234	5.73269	6.3137	7.23258e-07	2.87702e-06	5.18889
CNPY3	1.05202	6.2183	10.483	2.67149e-11	3.81913e-10	15.5318
SNORA72	1.05186	4.7492	6.81331	1.90426e-07	8.76448e-07	6.53473
RHNO1	1.05124	6.19381	6.563	3.70477e-07	1.58413e-06	5.86312
LILRB1	1.05093	6.5879	9.16314	5.31215e-10	4.93564e-09	12.4943
RPA1	1.05083	6.91396	13.061	1.43515e-13	4.66675e-12	20.8401
DBF4	1.05067	5.89957	6.23714	8.89217e-07	3.45927e-06	4.98088
RIBC2	1.04931	4.14168	9.70569	1.51231e-10	1.67738e-09	13.7704
DCTN4	1.04883	6.58588	16.7689	2.54406e-16	2.25617e-14	27.2519
RNASEH2A	1.04881	6.46775	10.3343	3.69996e-11	5.02302e-10	15.2008
IL32	1.04876	9.56196	2.82946	0.00844047	0.0142244	-4.03814
TYMS	1.0484	6.50299	7.77509	1.57629e-08	9.65668e-08	9.05506
LINC01114	1.04836	4.53129	4.0818	0.000327497	0.000739457	-0.907405
ABLIM3	1.04825	7.82903	5.96662	1.85219e-06	6.72766e-06	4.24281
FOXM1	1.04808	4.54752	7.67732	2.02032e-08	1.19585e-07	8.80367
JAKMIP1	1.04738	4.31002	6.98988	1.19555e-07	5.77098e-07	7.00492
KCND2	1.04688	2.85264	3.89465	0.00054271	0.00117216	-1.40194
THAP9-AS1	1.04686	8.41479	5.16986	1.64967e-05	4.83759e-05	2.05239
RIPK2	1.04679	6.43332	6.96261	1.28437e-07	6.15478e-07	6.93251
ZNF512	1.04655	7.67115	12.4291	4.81885e-13	1.30408e-11	19.6107
MAMDC4	1.04643	6.25987	6.94309	1.35207e-07	6.44751e-07	6.88061
TMED9	1.04617	9.46779	8.84867	1.12e-09	9.446e-09	11.737
GBGT1	1.04572	6.16406	7.78365	1.54251e-08	9.47521e-08	9.07701
RB1	1.04405	6.88926	15.1947	3.22799e-15	1.83182e-13	24.6851
SYT4	1.04381	3.77546	17.2935	1.1391e-16	1.14391e-14	28.062
LPXN	1.04254	6.35323	11.124	6.77293e-12	1.19612e-10	16.9262
GEMIN5	1.04012	7.23193	12.9767	1.68273e-13	5.34456e-12	20.6786
TRPA1	1.03924	3.95212	7.91953	1.09486e-08	7.00261e-08	9.42434
LOC145945	1.03898	4.34772	19.4749	4.94976e-18	8.31154e-16	31.2145
RNF217	1.03885	4.75981	9.43403	2.82323e-10	2.89039e-09	13.1363
CDH4	1.03882	4.32372	6.29344	7.63861e-07	3.01919e-06	5.13388
ERAP1	1.03801	5.50943	10.3987	3.21224e-11	4.43138e-10	15.3445
CEP120	1.03775	6.03635	10.0893	6.36663e-11	7.97771e-10	14.6494
BASP1	1.03741	6.3985	5.56606	5.54069e-06	1.80743e-05	3.14333
HYMAI	1.03734	5.44128	6.86432	1.66408e-07	7.78495e-07	6.67088
FAM89B	1.03553	7.30699	12.2185	7.28486e-13	1.83803e-11	19.1911
CAST	1.03527	7.29057	12.0437	1.03059e-12	2.4897e-11	18.8388
HHLA2	1.03491	3.70831	5.52562	6.19184e-06	2.00104e-05	3.03204
BTBD16	1.03458	3.55663	8.24404	4.87514e-09	3.4238e-08	10.2446
C11orf70	1.0336	4.45255	3.27681	0.00275774	0.00514432	-2.97623
SP100	1.03353	5.95781	10.7422	1.52455e-11	2.38709e-10	16.1018
AAED1	1.03308	7.25386	10.3278	3.75308e-11	5.07428e-10	15.1864
NXPE3	1.03293	4.44652	10.489	2.63686e-11	3.77226e-10	15.545
S100PBP	1.03279	7.13834	9.04217	7.06669e-10	6.33004e-09	12.2045
LOC101928370	1.03242	3.68903	7.35234	4.64942e-08	2.49929e-07	7.95992
AGBL2	1.03233	4.73454	5.39235	8.93388e-06	2.77092e-05	2.66512
SLC37A2	1.03214	5.31972	11.6194	2.42639e-12	5.08772e-11	17.9691
TRAF3IP2	1.03166	5.59626	13.2864	9.41069e-14	3.22621e-12	21.2682
GDI1	1.03136	8.78178	10.435	2.96687e-11	4.15727e-10	15.4252
CXorf36	1.03125	5.13647	11.3545	4.18621e-12	8.05247e-11	17.415
ASB16-AS1	1.03046	4.67829	12.0718	9.74515e-13	2.37062e-11	18.8956
ARHGAP26	1.02955	5.42387	9.33991	3.51283e-10	3.48662e-09	12.9143
LOC100293211	1.02922	3.47255	5.50461	6.56e-06	2.10904e-05	2.9742
FEN1	1.02856	6.25336	9.88148	1.01492e-10	1.18742e-09	14.1756
ASF1B	1.02795	5.33252	10.2359	4.59695e-11	6.02901e-10	14.9803
SERPINE2	1.02738	6.86724	2.84578	0.00811192	0.0137203	-4.00085
ITGA1	1.02726	6.69924	5.26032	1.28541e-05	3.85379e-05	2.30148
USP37	1.0272	5.59908	10.581	2.15881e-11	3.19547e-10	15.7483
OIP5	1.02692	4.29256	5.37525	9.3647e-06	2.89185e-05	2.61802
RGS2	1.02677	9.70581	3.18348	0.00349936	0.00637227	-3.2041
RAD54L	1.02635	4.73637	15.2591	2.89781e-15	1.69613e-13	24.7943
IFIT3	1.02598	8.34313	8.39063	3.39783e-09	2.50388e-08	10.6107
MGRN1	1.02514	8.57628	8.28357	4.42168e-09	3.13543e-08	10.3436
NOTCH3	1.02504	6.3373	8.16149	5.98142e-09	4.11587e-08	10.0372
RACGAP1	1.02494	6.82235	6.67016	2.78403e-07	1.22679e-06	6.15135
BNIP2	1.02476	7.55273	10.0872	6.39655e-11	8.00976e-10	14.6446
FAM209B	1.02452	4.71812	12.4907	4.27433e-13	1.18011e-11	19.7324
C17orf62	1.02317	7.02801	6.17904	1.04048e-06	3.99462e-06	4.82276
ADAM12	1.0231	4.3445	3.15231	0.00378719	0.0068483	-3.27953
LOC100505920	1.02295	3.75427	6.98679	1.20529e-07	5.81389e-07	6.99672
LOC441528	1.02195	5.35053	4.43397	0.000125316	0.000307895	0.0384509
ATP2B4	1.02128	6.79918	9.4124	2.96834e-10	3.02084e-09	13.0854
CCND2	1.02117	5.04627	12.5764	3.61923e-13	1.0312e-11	19.9013
DDX60L	1.02115	5.10483	9.35751	3.3719e-10	3.37454e-09	12.9559
SLITRK5	1.02032	3.48885	4.95296	3.00172e-05	8.34033e-05	1.45579
CALU	1.02011	7.28576	6.87643	1.61171e-07	7.56759e-07	6.70317
IFNAR2	1.01873	7.36459	6.97589	1.24031e-07	5.96735e-07	6.96778
JUNB	1.01813	8.46694	3.55655	0.00133349	0.00265686	-2.27626
DOCK11	1.01748	6.08209	5.4121	8.46113e-06	2.64084e-05	2.71951
DNASE2B	1.01629	3.22504	7.84335	1.32646e-08	8.28978e-08	9.2299
NID2	1.01592	7.77349	3.65212	0.00103638	0.00211404	-2.03195
SEMA6A	1.01567	6.47885	5.37079	9.48058e-06	2.92191e-05	2.60572
IBSP	1.01519	3.84119	4.95369	2.99569e-05	8.32583e-05	1.45779
ADCY3	1.01485	6.40251	8.30747	4.16863e-09	2.97867e-08	10.4034
KMT2E	1.01468	8.33838	8.16975	5.86004e-09	4.04205e-08	10.058
RSL1D1	1.01455	7.49154	11.0447	8.00524e-12	1.37005e-10	16.7563
ARHGAP4	1.01444	6.4962	7.63669	2.2406e-08	1.30959e-07	8.69886
CSK	1.01442	7.6332	7.35988	4.55968e-08	2.45815e-07	7.97964
IL4I1	1.01429	5.94389	3.82957	0.000646194	0.00137366	-1.5723
NRCAM	1.01415	6.5477	5.13897	1.79644e-05	5.22532e-05	1.96735
KCNMA1	1.01399	4.64359	6.04296	1.5049e-06	5.57092e-06	4.45153
LYST	1.0134	5.26599	10.2224	4.73624e-11	6.19979e-10	14.9499
LOC145474	1.01216	4.09719	4.36284	0.000152276	0.000367218	-0.153909
LOC100507311	1.01186	7.15594	4.04052	0.000366234	0.000818444	-1.01704
DDX58	1.01161	6.87902	9.17783	5.13189e-10	4.80932e-09	12.5293
RBM4	1.01027	7.09764	8.09647	7.03134e-09	4.7243e-08	9.87322
LOC102725408	1.01025	4.42982	4.14862	0.000273175	0.000626478	-0.729333
MN1	1.00997	4.84397	4.94425	3.07478e-05	8.52136e-05	1.43185
IGKC	1.0099	5.76677	3.27158	0.00279496	0.00520712	-2.98908
PER2	1.00989	5.98923	8.13663	6.3625e-09	4.34184e-08	9.97456
BRIP1	1.00986	3.43036	10.4421	2.92109e-11	4.10088e-10	15.441
PPAP2C	1.00972	5.39369	3.45351	0.00174626	0.00340347	-2.53684
GALNT2	1.00965	6.91402	4.85301	3.95509e-05	0.000107245	1.18142
MCM7	1.00825	7.42225	9.74221	1.39161e-10	1.5604e-09	13.8549
CPA4	1.0082	4.88843	5.02547	2.4573e-05	6.9598e-05	1.65507
LINC00626	1.00807	3.59977	4.46493	0.000115111	0.000284735	0.122378
RPS19	1.00612	10.0401	10.8522	1.20461e-11	1.95235e-10	16.3411
NBN	1.00572	7.32045	8.92874	9.2512e-10	8.03051e-09	11.931
PPIP5K2	1.00567	7.87271	9.44655	2.74258e-10	2.8191e-09	13.1657
MIF	1.00516	11.8899	9.97822	8.16307e-11	9.89519e-10	14.3968
C1orf54	1.00476	8.42999	7.02788	1.0821e-07	5.2768e-07	7.10568
RPL10L	1.00471	5.08501	9.84567	1.10047e-10	1.27368e-09	14.0933
LIX1L	1.00466	6.28714	11.574	2.66254e-12	5.54317e-11	17.8747
MAP1B	1.00411	7.22856	4.82945	4.22057e-05	0.000113826	1.11685
SETD7	1.00327	5.96193	8.43488	3.04875e-09	2.27695e-08	10.7207
NAA25	1.00302	6.20513	8.33004	3.9433e-09	2.83946e-08	10.4597
LRRC39	1.0027	3.6383	13.6136	5.14907e-14	1.93548e-12	21.8798
TSPAN4	1.00255	8.11444	8.94309	8.9405e-10	7.78416e-09	11.9657
PKN1	1.00254	6.79544	8.80312	1.24917e-09	1.04069e-08	11.6262
GIMAP7	1.00253	7.68054	5.53015	6.1151e-06	1.97968e-05	3.04453
LGALS3BP	1.00218	9.53573	5.58912	5.20064e-06	1.7071e-05	3.20678
MCHR1	1.00178	4.16663	4.46514	0.000115046	0.000284607	0.12294
FGD6	1.00131	4.92679	6.30627	7.37885e-07	2.92668e-06	5.16872
KCNN3	1.00113	4.9002	6.71706	2.45773e-07	1.10053e-06	6.27716
NIM1K	1.00068	4.6533	5.58776	5.22008e-06	1.71294e-05	3.20305
TIPARP	1.00007	8.88425	2.77911	0.00953473	0.0158907	-4.15242
LINC00551	-1.00069	2.98418	-8.1586	6.02453e-09	4.14295e-08	10.0299
CHAC2	-1.00383	5.06761	-7.63473	2.25188e-08	1.31542e-07	8.69378
BRE-AS1	-1.00424	6.46645	-2.81688	0.00870222	0.014633	-4.0668
SLC27A4	-1.00559	6.72887	-10.5834	2.14793e-11	3.18167e-10	15.7534
HOXA5	-1.0061	8.04695	-4.32041	0.00017102	0.000408907	-0.268395
NDUFA4	-1.00635	11.4732	-10.5696	2.21301e-11	3.26627e-10	15.7231
FA2H	-1.0066	5.17632	-12.7529	2.57674e-13	7.69492e-12	20.2462
BDH1	-1.00761	5.33667	-11.3737	4.02283e-12	7.81894e-11	17.4554
A1CF	-1.00901	8.11579	-2.62567	0.0137459	0.02214	-4.49326
FRAS1	-1.0098	5.06329	-7.45575	3.56131e-08	1.97021e-07	8.22972
CTD-3080P12.3	-1.01077	3.47724	-8.39863	3.33181e-09	2.457e-08	10.6306
SLC9A2	-1.0118	3.82096	-13.0295	1.52298e-13	4.92111e-12	20.7798
IGFBPL1	-1.0119	3.57005	-14.3798	1.30663e-14	5.81906e-13	23.2697
SIX4	-1.01349	3.49124	-22.7514	7.56954e-20	2.28043e-17	35.3876
STAC	-1.01417	6.64879	-6.32902	6.9401e-07	2.77469e-06	5.23046
MAOA	-1.0181	8.62371	-3.1757	0.00356917	0.00648554	-3.22296
RNF123	-1.01839	7.08886	-9.83013	1.13986e-10	1.3163e-09	14.0576
PINLYP	-1.0185	5.98063	-8.70809	1.56992e-09	1.2717e-08	11.3942
QDPR	-1.0192	7.36945	-8.52234	2.46253e-09	1.88871e-08	10.9374
IGFBP5	-1.01956	7.04412	-5.8793	2.34996e-06	8.32894e-06	4.00368
MUT	-1.02011	8.81727	-5.60371	4.99653e-06	1.64591e-05	3.2469
TRHDE-AS1	-1.02034	5.85306	-3.31919	0.00247318	0.00466792	-2.87177
CHCHD4	-1.02052	7.62953	-12.6919	2.89637e-13	8.52515e-12	20.1275
HMGCL	-1.02314	9.13224	-9.55004	2.16004e-10	2.2904e-09	13.4082
HINT2	-1.02424	9.32329	-7.37882	4.34208e-08	2.35509e-07	8.02912
COX7B	-1.02432	9.06816	-8.24605	4.85098e-09	3.41034e-08	10.2496
PPARGC1A	-1.02532	5.23185	-5.1224	1.88052e-05	5.45294e-05	1.92173
USP2	-1.02592	5.28105	-5.46107	7.39447e-06	2.33951e-05	2.85434
FAM3D	-1.02604	5.48493	-11.8153	1.62988e-12	3.67728e-11	18.3732
SYNGR3	-1.02695	4.33942	-7.33799	4.82511e-08	2.58424e-07	7.92239
ACAT1	-1.02777	6.41596	-6.41535	5.50207e-07	2.25431e-06	5.4644
PLS1	-1.02837	8.61244	-5.47514	7.11363e-06	2.26288e-05	2.89309
AGR2	-1.02839	4.31411	-7.29815	5.34929e-08	2.83093e-07	7.81805
GCHFR	-1.02936	7.7414	-6.09902	1.29242e-06	4.85809e-06	4.6046
GP2	-1.02936	4.97008	-7.80134	1.47497e-08	9.11225e-08	9.12237
ITIH2	-1.0302	4.61325	-8.01486	8.62033e-09	5.65289e-08	9.66667
PKHD1	-1.0309	5.78298	-5.04752	2.31216e-05	6.58514e-05	1.71573
RAB11FIP4	-1.03151	5.224	-11.5156	3.00188e-12	6.13127e-11	17.7528
C2CD4A	-1.03155	3.47881	-3.81467	0.00067248	0.00142304	-1.61118
AADAT	-1.03207	5.42045	-8.56329	2.22902e-09	1.73297e-08	11.0385
AGR3	-1.03338	2.99799	-6.48185	4.60312e-07	1.92487e-06	5.6442
PROX1	-1.03437	4.36752	-7.71765	1.82346e-08	1.09611e-07	8.90751
COMMD8	-1.03464	9.6826	-10.4592	2.81409e-11	3.98131e-10	15.4789
CHP1	-1.03482	8.01203	-11.376	4.00324e-12	7.81051e-11	17.4604
PRTG	-1.03947	3.82472	-13.0048	1.59562e-13	5.10747e-12	20.7325
INSC	-1.03971	3.3889	-7.83498	1.35479e-08	8.44365e-08	9.20848
FLJ31715	-1.0407	5.09494	-12.0959	9.28788e-13	2.27218e-11	18.9444
C15orf59	-1.04077	4.51556	-13.0403	1.4921e-13	4.83656e-12	20.8006
SLC23A3	-1.04227	7.03608	-2.95378	0.00622342	0.0107853	-3.75111
ATP5G1	-1.04354	9.17484	-11.1453	6.47664e-12	1.15575e-10	16.9716
BMP7	-1.04383	4.77522	-16.1326	6.93406e-16	5.20334e-14	26.2398
NKIRAS1	-1.04411	7.04903	-12.419	4.91473e-13	1.31957e-11	19.5907
SETMAR	-1.04433	4.63357	-15.6047	1.6332e-15	1.08277e-13	25.3742
C2orf88	-1.04462	5.88807	-5.54169	5.92422e-06	1.92183e-05	3.07629
MPC1	-1.04525	6.78971	-10.9407	9.97665e-12	1.66164e-10	16.5326
LINC01159	-1.0454	6.07223	-5.20545	1.49543e-05	4.42197e-05	2.15036
BEX5	-1.0457	7.74374	-2.67766	0.0121557	0.0198391	-4.37907
AMN	-1.0467	6.75007	-5.03404	2.39982e-05	6.81207e-05	1.67865
C1orf192	-1.04675	4.3946	-10.2008	4.969e-11	6.43457e-10	14.9012
NTRK2	-1.04718	4.62213	-6.42113	5.41728e-07	2.2258e-06	5.48005
ACO1	-1.0475	7.10692	-4.40389	0.000136086	0.000331532	-0.0429686
HOXA6	-1.04779	5.1989	-8.79651	1.26912e-09	1.05516e-08	11.6101
MFHAS1	-1.04786	7.77132	-7.20673	6.78224e-08	3.48048e-07	7.57798
APOD	-1.04845	6.09045	-2.95652	0.0061815	0.0107163	-3.74473
SLC26A9	-1.0487	6.64494	-2.99176	0.00566452	0.00991146	-3.66211
DNAJC28	-1.05023	3.74794	-12.3849	5.25359e-13	1.40137e-11	19.523
SLC25A10	-1.05046	6.27084	-6.28682	7.77611e-07	3.0688e-06	5.11591
ACOT13	-1.05111	8.39718	-5.72836	3.55017e-06	1.21215e-05	3.58955
MYLK4	-1.05127	4.27867	-8.0488	7.91912e-09	5.2536e-08	9.75267
IDNK	-1.05139	6.93611	-6.81283	1.90665e-07	8.77352e-07	6.53346
C9orf135	-1.05149	3.50883	-8.04675	7.95982e-09	5.27547e-08	9.74748
HLF	-1.05176	6.66835	-3.28611	0.00269269	0.00503261	-2.95335
TFAP2A	-1.0527	4.2338	-6.16826	1.07129e-06	4.10138e-06	4.79339
AJAP1	-1.05433	4.64482	-7.86244	1.2641e-08	7.95344e-08	9.27869
EPB41L4B	-1.05654	4.14655	-15.5628	1.74982e-15	1.14894e-13	25.3044
HDHD3	-1.05753	7.80575	-5.58547	5.25304e-06	1.72265e-05	3.19674
C10orf126	-1.05853	3.45077	-7.61599	2.36214e-08	1.37046e-07	8.64537
GDPD3	-1.05995	6.66192	-5.48225	6.97596e-06	2.22249e-05	2.91265
C1orf194	-1.06035	4.35664	-10.8637	1.17523e-11	1.91e-10	16.3662
SPAG5	-1.06103	7.37836	-4.39865	0.000138052	0.000335963	-0.0571325
LGSN	-1.06188	3.77255	-3.56859	0.00129194	0.00258136	-2.24562
SKIDA1	-1.06211	3.72136	-10.8411	1.23358e-11	1.98985e-10	16.317
HBQ1	-1.0636	4.72561	-10.8962	1.09658e-11	1.80729e-10	16.4366
PDP2	-1.06408	6.24252	-6.95495	1.31053e-07	6.26838e-07	6.91214
KCTD6	-1.0663	6.64423	-8.94114	8.98199e-10	7.81006e-09	11.961
CCDC154	-1.06835	5.49021	-11.5331	2.89573e-12	5.96201e-11	17.7894
SLC45A1	-1.06938	5.02052	-10.9712	9.35174e-12	1.57356e-10	16.5984
TRPM3	-1.06964	5.36405	-5.02223	2.47933e-05	7.01542e-05	1.64618
PDZD3	-1.0705	6.51315	-6.833	1.8076e-07	8.37985e-07	6.58733
CADM4	-1.07323	4.97748	-13.8551	3.32141e-14	1.3161e-12	22.3243
MRPS25	-1.07393	6.50069	-14.6722	7.85838e-15	3.81485e-13	23.7846
FLJ37786	-1.07634	3.49668	-3.19266	0.00341867	0.00624141	-3.18182
GAS2	-1.07786	6.17788	-2.56389	0.0158868	0.0252508	-4.62719
VEPH1	-1.07884	6.01947	-6.55313	3.8038e-07	1.62174e-06	5.83652
C21orf33	-1.07889	8.84245	-7.71639	1.82932e-08	1.09867e-07	8.90426
CYP4F11	-1.07957	3.6674	-3.59541	0.00120383	0.00242089	-2.1772
LDHB	-1.08165	12.5878	-10.4511	2.86464e-11	4.03611e-10	15.4608
PLA2G12B	-1.0821	6.07846	-3.77688	0.000743911	0.00156017	-1.70955
TJP3	-1.0824	5.41522	-14.4707	1.11459e-14	5.0405e-13	23.4307
FCRLB	-1.08332	6.3092	-6.21693	9.39133e-07	3.64067e-06	4.9259
TMEM38A	-1.08341	5.30087	-11.7278	1.94583e-12	4.24971e-11	18.1933
MECOM	-1.0848	5.34153	-14.0171	2.48344e-14	1.00744e-12	22.619
NELL1	-1.08504	4.18349	-9.57331	2.04755e-10	2.18469e-09	13.4626
RASSF1-AS1	-1.08667	4.7559	-10.1261	5.86521e-11	7.41696e-10	14.7327
SLC25A20	-1.08833	7.50652	-8.71606	1.54003e-09	1.24996e-08	11.4137
RMST	-1.08926	4.15074	-7.89065	1.17735e-08	7.46955e-08	9.35073
FRK	-1.08927	6.48178	-9.20012	4.87026e-10	4.60204e-09	12.5825
RORB	-1.08969	3.33244	-15.2392	2.99572e-15	1.72818e-13	24.7607
GCAT	-1.08993	6.93555	-7.00335	1.15401e-07	5.58756e-07	7.04066
LINC01115	-1.09082	3.98404	-15.9687	9.02456e-16	6.61257e-14	25.9736
MAP3K9	-1.09135	4.66488	-11.6321	2.36451e-12	4.99375e-11	17.9953
LGALS2	-1.09425	9.17497	-2.4965	0.0185713	0.0291065	-4.77099
CIRH1A	-1.09454	9.46024	-11.2903	4.78339e-12	9.05662e-11	17.2795
AGTR1	-1.09664	5.88464	-2.69666	0.0116185	0.0190231	-4.33699
HIST2H2BE	-1.09732	6.24188	-4.40408	0.000136015	0.0003314	-0.0424566
ASAP3	-1.09822	5.86794	-8.12712	6.51482e-09	4.42076e-08	9.95057
BEX2	-1.09825	8.68103	-3.36273	0.00221036	0.00421811	-2.76382
ABCA8	-1.09885	4.2479	-9.84586	1.09999e-10	1.27368e-09	14.0938
UCA1	-1.0991	4.65857	-12.1013	9.18879e-13	2.25439e-11	18.9553
ARHGEF26	-1.09944	3.785	-12.8794	2.02386e-13	6.30102e-12	20.4913
BSND	-1.10046	5.14645	-12.4753	4.40391e-13	1.20774e-11	19.7021
C11orf54	-1.1006	9.58796	-5.0883	2.06606e-05	5.95125e-05	1.8279
ADRA2A	-1.10109	4.43258	-5.01454	2.53252e-05	7.15503e-05	1.62503
KCNE1	-1.10509	3.67247	-7.1064	8.81037e-08	4.39681e-07	7.31345
LOC100507564	-1.1053	4.28205	-11.3084	4.60693e-12	8.78749e-11	17.3177
THRB	-1.10748	5.39702	-5.85055	2.54179e-06	8.93463e-06	3.92489
ZNRF3	-1.11359	8.17203	-5.63479	4.58803e-06	1.52532e-05	3.33239
GABARAPL1	-1.1149	8.39425	-6.3327	6.87171e-07	2.74895e-06	5.24044
PBX1	-1.11519	7.53086	-5.27554	1.23258e-05	3.71278e-05	2.34341
DPT	-1.11795	4.66264	-3.22875	0.00311843	0.00574533	-3.09394
RNF43	-1.11885	5.51352	-10.2084	4.88535e-11	6.35437e-10	14.9184
NPR3	-1.11954	8.24446	-2.69421	0.0116865	0.0191176	-4.34243
AQP6	-1.1198	5.9194	-12.9046	1.92916e-13	6.06145e-12	20.5399
AMFR	-1.12147	6.46526	-4.59721	8.00328e-05	0.000203874	0.481992
GRAMD1C	-1.12232	7.84044	-4.94123	3.10051e-05	8.58454e-05	1.42356
CACNA2D2	-1.12252	5.81693	-14.2627	1.60556e-14	6.92452e-13	23.061
ATP2C2	-1.12254	4.62317	-15.0657	4.01204e-15	2.22137e-13	24.4651
ACTRT3	-1.12334	4.81586	-7.47457	3.39312e-08	1.88736e-07	8.27869
IL1RL1	-1.12477	5.74068	-6.06314	1.4246e-06	5.30142e-06	4.50667
ESRRB	-1.12616	4.64146	-10.6997	1.67052e-11	2.57117e-10	16.0089
HPCAL4	-1.12655	4.54871	-14.876	5.5379e-15	2.90995e-13	24.1389
HACL1	-1.12682	7.88265	-11.3689	4.06312e-12	7.87484e-11	17.4453
FAM171A1	-1.12686	8.65656	-5.99606	1.70954e-06	6.25722e-06	4.32336
MIR10A	-1.12904	5.34338	-5.91613	2.12534e-06	7.60653e-06	4.1046
SEMA6D	-1.12951	5.13354	-7.166	7.54117e-08	3.83061e-07	7.47072
IRF6	-1.12966	5.16373	-7.43668	3.74042e-08	2.05984e-07	8.18006
WDFY3-AS2	-1.12987	6.87133	-4.60209	7.8967e-05	0.000201409	0.495272
EPHX1	-1.1335	8.74721	-4.11328	0.00030069	0.000684132	-0.823587
SLC52A3	-1.13405	5.75403	-15.1949	3.22709e-15	1.83182e-13	24.6854
RBP5	-1.13498	10.3677	-3.04443	0.00496784	0.00877868	-3.53771
AHCY	-1.13534	9.40719	-8.14772	6.1895e-09	4.23791e-08	10.0025
ZNF542P	-1.13581	5.40955	-8.04285	8.03776e-09	5.31509e-08	9.7376
PODXL	-1.13726	10.0648	-5.11142	1.93833e-05	5.61094e-05	1.89153
MRPL34	-1.13764	8.33681	-10.0672	6.68827e-11	8.31408e-10	14.5993
SLC22A2	-1.14117	9.06547	-2.81789	0.00868083	0.0146006	-4.06449
PM20D1	-1.14283	4.38192	-3.51205	0.00149862	0.00295626	-2.38917
HRASLS2	-1.14403	5.10365	-9.67277	1.63033e-10	1.7934e-09	13.694
PAPPA2	-1.14439	4.95806	-9.88424	1.00861e-10	1.18206e-09	14.1819
MPP7	-1.14532	4.41231	-12.3677	5.43283e-13	1.44167e-11	19.4889
PDGFRA	-1.14534	4.51821	-9.758	1.34251e-10	1.51363e-09	13.8914
CYP3A7-CYP3AP1	-1.14535	7.08232	-5.95497	1.91189e-06	6.91752e-06	4.21093
PLEKHA5	-1.1455	7.07604	-6.8666	1.65406e-07	7.74501e-07	6.67697
USP46-AS1	-1.1457	3.81134	-15.0397	4.19198e-15	2.31474e-13	24.4207
TBC1D24	-1.14763	6.36407	-10.3144	3.86591e-11	5.20641e-10	15.1563
C9orf173	-1.14818	4.62242	-15.1037	3.76213e-15	2.08865e-13	24.5302
PCBD1	-1.14859	8.87787	-8.90948	9.68584e-10	8.35821e-09	11.8844
LOC441179	-1.15011	3.87229	-8.75664	1.39667e-09	1.14724e-08	11.5129
PDZRN3	-1.15013	4.84273	-6.15709	1.10418e-06	4.21549e-06	4.76296
ACMSD	-1.15154	9.55101	-3.84995	0.000611859	0.0013065	-1.51903
PROM2	-1.15306	5.55724	-11.8132	1.6367e-12	3.68309e-11	18.369
OGG1	-1.15392	6.08509	-14.7338	7.06652e-15	3.53085e-13	23.8922
LOC645321	-1.15485	4.5495	-11.9127	1.33938e-12	3.12512e-11	18.5726
PDHB	-1.15576	9.1326	-18.9352	1.0446e-17	1.52854e-15	30.4652
CCDC160	-1.15657	3.47133	-7.44847	3.62858e-08	2.00418e-07	8.21078
LINC00622	-1.15729	6.18068	-5.1745	1.62869e-05	4.78357e-05	2.06516
GLOD5	-1.16011	4.09601	-12.461	4.52867e-13	1.23705e-11	19.6737
FOLR3	-1.16128	5.24744	-9.94033	8.88878e-11	1.06302e-09	14.3103
UQCRFS1	-1.16139	10.9759	-13.6074	5.20758e-14	1.95389e-12	21.8684
CYFIP2	-1.1625	9.34957	-5.3303	1.05993e-05	3.23507e-05	2.4942
RIMBP2	-1.16252	3.94774	-10.8997	1.08859e-11	1.79845e-10	16.444
PRKAR2B	-1.16365	6.49879	-4.88388	3.63214e-05	9.92421e-05	1.26612
GHR	-1.16461	7.86558	-5.15864	1.70155e-05	4.97545e-05	2.02149
STRADB	-1.16481	9.03813	-7.08592	9.295e-08	4.61506e-07	7.25932
KCNH6	-1.16606	4.28476	-8.23315	5.00821e-09	3.50643e-08	10.2173
ADH1A	-1.16672	3.52657	-16.3095	5.23048e-16	4.05877e-14	26.5245
RNF183	-1.16771	7.14148	-2.70153	0.0114844	0.018817	-4.32618
KCNK10	-1.16843	4.28587	-10.815	1.30412e-11	2.09375e-10	16.2604
DLST	-1.16887	7.94389	-9.41258	2.96714e-10	3.02084e-09	13.0858
NQO2	-1.16911	7.88273	-6.52217	4.13211e-07	1.74537e-06	5.75303
APEH	-1.17011	6.49906	-20.3872	1.45734e-18	2.98551e-16	32.439
CLDN16	-1.17056	5.83356	-12.3374	5.76507e-13	1.51415e-11	19.4287
GCDH	-1.17093	7.17859	-7.02272	1.09682e-07	5.34094e-07	7.09202
TTC39B	-1.17426	5.93682	-9.19523	4.92647e-10	4.64872e-09	12.5708
C1QTNF7	-1.17557	4.05324	-8.92447	9.34577e-10	8.10187e-09	11.9207
CYP4F12	-1.17561	6.32762	-7.40231	4.0867e-08	2.22897e-07	8.09045
MTCH2	-1.17716	9.2169	-10.4113	3.12503e-11	4.33443e-10	15.3724
GALNT3	-1.1804	5.56442	-10.0555	6.86534e-11	8.49296e-10	14.5727
SUCLG2	-1.18062	9.46848	-7.97612	9.49864e-09	6.17156e-08	9.56832
GPX3	-1.18066	13.3006	-3.19899	0.00336408	0.00615436	-3.16644
LOC101927720	-1.1807	4.88259	-9.88149	1.01491e-10	1.18742e-09	14.1756
NXPH2	-1.18071	3.61595	-17.3829	9.95319e-17	1.02463e-14	28.198
APCDD1L	-1.18164	5.39856	-8.48073	2.72548e-09	2.06321e-08	10.8344
NFASC	-1.1825	5.44239	-8.35709	3.68952e-09	2.68694e-08	10.5272
CCDC51	-1.18278	7.4245	-12.885	2.00244e-13	6.27246e-12	20.5021
SPTBN2	-1.18281	5.353	-7.67693	2.02236e-08	1.19671e-07	8.80265
ACAD8	-1.18313	7.70421	-8.71632	1.53907e-09	1.24968e-08	11.4143
GSTZ1	-1.18362	6.84302	-11.7509	1.85692e-12	4.07291e-11	18.2408
CPAMD8	-1.18377	5.42484	-13.2355	1.03474e-13	3.51536e-12	21.172
GPC4	-1.18386	7.36799	-4.18679	0.000246234	0.000570435	-0.627279
KLHL14	-1.18397	4.11791	-15.9403	9.44844e-16	6.88828e-14	25.9273
HIBCH	-1.18574	9.30555	-5.92885	2.05289e-06	7.37557e-06	4.13944
ERMP1	-1.18648	7.86053	-11.4	3.80946e-12	7.5079e-11	17.5108
SH3BGR	-1.18669	5.89841	-8.0375	8.14589e-09	5.37618e-08	9.72405
KCNMB2	-1.1869	4.06939	-8.79038	1.28793e-09	1.06863e-08	11.5951
HSD17B14	-1.18824	7.75654	-6.93035	1.39817e-07	6.65031e-07	6.84674
LINC01314	-1.18837	5.2032	-10.0057	7.67547e-11	9.36508e-10	14.4594
BCKDHB	-1.18849	6.40664	-9.95772	8.54775e-11	1.02764e-09	14.35
SLC6A13	-1.19227	9.87105	-2.43782	0.0212427	0.0329131	-4.8942
RPS6KA6	-1.19524	3.8938	-12.6267	3.28435e-13	9.45137e-12	19.9999
PDHA1	-1.19543	8.87447	-14.0416	2.37712e-14	9.74308e-13	22.6634
CHDH	-1.19775	6.36504	-6.31018	7.30151e-07	2.90162e-06	5.17933
LOC101930114	-1.20039	5.58737	-10.8734	1.15125e-11	1.88074e-10	16.3871
HOXA7	-1.20135	6.83948	-4.64869	6.94599e-05	0.000179439	0.622382
KIF23	-1.20171	4.25114	-6.59762	3.3777e-07	1.45644e-06	5.95634
THSD7A	-1.20192	7.29849	-8.13332	6.41506e-09	4.37043e-08	9.96622
KLHDC9	-1.2023	7.90165	-7.76721	1.60806e-08	9.83364e-08	9.03485
SAMD5	-1.20325	5.72466	-5.44298	7.77164e-06	2.44449e-05	2.80455
COBL	-1.20335	6.29948	-5.48954	6.83753e-06	2.18444e-05	2.93272
TBATA	-1.20379	4.36398	-15.9678	9.03797e-16	6.61257e-14	25.9721
CCL21	-1.20581	5.5186	-5.27737	1.22639e-05	3.69522e-05	2.34844
ZNF582-AS1	-1.20688	4.93848	-17.3989	9.71567e-17	1.01033e-14	28.2223
SPHK2	-1.2083	6.51512	-12.7104	2.79561e-13	8.28813e-12	20.1634
ACSM2A	-1.21021	9.4087	-2.35102	0.025844	0.0393256	-5.07289
GRHPR	-1.21025	9.59138	-8.43872	3.02022e-09	2.25811e-08	10.7302
TMEM95	-1.21115	5.21648	-15.7379	1.31278e-15	9.08566e-14	25.5949
CADPS2	-1.21268	7.80518	-7.73688	1.73661e-08	1.05193e-07	8.95694
CXCL12	-1.2127	8.56178	-4.38988	0.000141411	0.000343363	-0.0808648
KCNN2	-1.21373	4.51781	-5.35934	9.78423e-06	3.00645e-05	2.5742
GABRB3	-1.21546	5.17103	-5.04071	2.35608e-05	6.69627e-05	1.69698
WIF1	-1.21578	3.47289	-7.00155	1.15949e-07	5.61146e-07	7.03587
SCGB1D2	-1.21648	4.48196	-4.23861	0.000213814	0.000501281	-0.488388
SMLR1	-1.21937	4.47437	-6.69078	2.63548e-07	1.16989e-06	6.20669
SLC16A7	-1.21939	5.73633	-5.26544	1.26739e-05	3.8042e-05	2.31559
HOXD8	-1.21942	8.05203	-9.36343	3.32579e-10	3.33328e-09	12.9699
RAB4B	-1.22008	6.43366	-11.6167	2.44002e-12	5.11107e-11	17.9634
ANK2	-1.22081	6.19651	-4.31189	0.000175046	0.000417363	-0.29133
CASR	-1.22117	4.81097	-17.2201	1.27303e-16	1.25382e-14	27.95
VDR	-1.22225	6.28041	-7.96355	9.8027e-09	6.34096e-08	9.53639
ITGA9-AS1	-1.22251	4.81125	-13.2221	1.06086e-13	3.59218e-12	21.1467
SLC16A2	-1.22361	6.92018	-8.10146	6.94451e-09	4.6767e-08	9.88581
SLC6A18	-1.22399	6.3517	-2.74334	0.0103917	0.0171722	-4.2329
RAB17	-1.22466	7.94837	-4.79221	4.6772e-05	0.000124925	1.01479
BSN	-1.22491	3.89194	-14.9394	4.97062e-15	2.65177e-13	24.2483
LOC102725343	-1.22574	5.23235	-8.28861	4.36706e-09	3.10746e-08	10.3562
PPP2R2B	-1.22674	4.15423	-15.6733	1.45919e-15	9.89834e-14	25.488
WNK3	-1.2276	4.17816	-20.4605	1.32372e-18	2.74458e-16	32.5352
CDH3	-1.22933	5.53794	-7.2288	6.40402e-08	3.31268e-07	7.63602
ABCA6	-1.23091	4.16565	-6.41836	5.45774e-07	2.23928e-06	5.47255
MST1	-1.23147	8.99512	-4.22089	0.000224395	0.000523809	-0.535921
F5	-1.23252	5.00328	-4.05644	0.000350784	0.000786405	-0.974785
ZNF662	-1.23488	4.87531	-6.34964	6.56527e-07	2.63615e-06	5.28639
SERPINA4	-1.23661	5.4092	-6.88004	1.59644e-07	7.49936e-07	6.71279
PALM	-1.2413	7.5245	-9.31064	3.76073e-10	3.688e-09	12.845
EVPL	-1.24509	5.86226	-14.6374	8.34437e-15	3.95701e-13	23.7239
FIBIN	-1.24557	6.52482	-4.40418	0.000135978	0.000331349	-0.0421876
SLC3A2	-1.24636	8.89308	-8.82254	1.19232e-09	9.98154e-09	11.6734
TLCD1	-1.25043	5.4365	-7.39848	4.1273e-08	2.24752e-07	8.08045
SUCLG1	-1.25092	7.36239	-13.333	8.63028e-14	3.01706e-12	21.356
MT2A	-1.25157	11.7025	-4.97966	2.78846e-05	7.80281e-05	1.52915
LINC00284	-1.25395	3.59626	-6.71548	2.46804e-07	1.10393e-06	6.27294
DTX1	-1.2541	5.66949	-12.2185	7.28538e-13	1.83803e-11	19.191
PPP1R36	-1.2543	5.2146	-5.20436	1.49991e-05	4.43392e-05	2.14738
NEDD4L	-1.25589	7.45956	-6.28327	7.85101e-07	3.09359e-06	5.10626
SLC2A4	-1.25737	3.61305	-14.6483	8.18865e-15	3.91946e-13	23.7429
SLC39A5	-1.25823	7.79619	-4.30831	0.00017677	0.000421199	-0.300995
HOXB-AS3	-1.259	4.51089	-17.9757	4.1277e-17	4.75057e-15	29.0842
DCAF12L1	-1.26196	5.18351	-2.42473	0.0218845	0.0338206	-4.92141
SLC19A2	-1.26214	7.03706	-5.38427	9.13506e-06	2.82776e-05	2.64285
EYA2	-1.26388	5.36359	-7.0221	1.09862e-07	5.34795e-07	7.09036
SLC34A3	-1.26617	6.20416	-9.47382	2.57503e-10	2.66964e-09	13.2297
SLC9A3	-1.2673	4.35298	-8.61101	1.98522e-09	1.5624e-08	11.156
FMN2	-1.26881	4.02153	-16.5224	3.7373e-16	3.1378e-14	26.8639
CYSTM1	-1.27328	11.1652	-7.30389	5.27037e-08	2.79206e-07	7.83309
LOC100505942	-1.27545	5.20444	-16.559	3.52896e-16	2.98737e-14	26.9217
SERPINB7	-1.27552	3.89684	-16.2894	5.40045e-16	4.17486e-14	26.4922
FOLH1B	-1.27574	6.93091	-4.39195	0.00014061	0.00034162	-0.0752572
ZGPAT	-1.27661	7.69674	-6.02284	1.58947e-06	5.85435e-06	4.39656
LOC284798	-1.27675	5.03909	-19.559	4.41304e-18	7.5971e-16	31.3296
GALM	-1.27705	8.46615	-7.57119	2.64859e-08	1.51731e-07	8.52947
DPP6	-1.27739	4.65445	-15.614	1.60843e-15	1.0733e-13	25.3896
LINC00845	-1.27863	3.74247	-7.91285	1.1134e-08	7.09898e-08	9.40733
ACADM	-1.27932	10.6237	-6.83409	1.80242e-07	8.36151e-07	6.59023
WFDC1	-1.27935	6.78569	-6.17204	1.06038e-06	4.06264e-06	4.80369
ZNF684	-1.27945	5.19204	-10.7949	1.36159e-11	2.16902e-10	16.2166
COL4A3	-1.28183	4.75235	-9.78421	1.26491e-10	1.44054e-09	13.9519
GPM6B	-1.28213	4.99643	-6.10156	1.28355e-06	4.82916e-06	4.61153
STK33	-1.28404	4.84402	-8.3778	3.50656e-09	2.57014e-08	10.5788
ACSBG2	-1.2846	4.58423	-9.95587	8.58337e-11	1.03131e-09	14.3458
IP6K3	-1.28469	5.34888	-3.47621	0.00164588	0.00322224	-2.47971
LOC100289019	-1.28856	6.82895	-10.2181	4.78172e-11	6.24336e-10	14.9402
CDHR2	-1.29199	7.17397	-5.39131	8.95953e-06	2.77762e-05	2.66225
PALM3	-1.29253	6.93751	-5.69574	3.882e-06	1.31124e-05	3.49993
HMGCS2	-1.29313	5.82927	-3.4263	0.00187445	0.00362607	-2.60514
MPP5	-1.29386	7.62656	-8.22604	5.09701e-09	3.56373e-08	10.1994
BTD	-1.29606	5.93311	-13.3583	8.23604e-14	2.90402e-12	21.4035
DHRS4-AS1	-1.29612	5.73673	-10.8136	1.30821e-11	2.09868e-10	16.2573
CTNNAL1	-1.2968	8.19422	-9.94735	8.74953e-11	1.04864e-09	14.3263
MBOAT2	-1.29777	6.59481	-12.7585	2.54891e-13	7.62292e-12	20.2572
HGD	-1.29859	7.64253	-7.52372	2.99094e-08	1.69027e-07	8.4064
DNASE1L3	-1.29922	5.66479	-8.49911	2.60596e-09	1.98386e-08	10.8799
CALML3	-1.29984	4.42088	-9.31951	3.68379e-10	3.62295e-09	12.866
PLEKHA6	-1.30113	6.40697	-12.4602	4.53492e-13	1.23705e-11	19.6723
HAGH	-1.30585	8.72155	-7.7776	1.56629e-08	9.604e-08	9.06151
GIPC2	-1.31135	8.02304	-3.97836	0.000433207	0.000954164	-1.18156
C5	-1.31238	6.04039	-8.12982	6.47125e-09	4.39871e-08	9.95738
HRSP12	-1.31268	8.46543	-5.84572	2.57555e-06	9.03936e-06	3.91164
TPD52L1	-1.31289	7.56739	-3.73507	0.000831571	0.00172827	-1.81799
ST6GALNAC2	-1.31499	6.46546	-8.52837	2.42664e-09	1.86537e-08	10.9523
AMPH	-1.31545	4.26133	-9.25707	4.26192e-10	4.09904e-09	12.718
CTSH	-1.31616	11.2357	-7.88098	1.2064e-08	7.63259e-08	9.32603
COBLL1	-1.31714	5.57868	-12.5787	3.60353e-13	1.02816e-11	19.9057
GAS1	-1.31749	5.34344	-10.6148	2.00668e-11	3.02063e-10	15.8225
PRDM16	-1.31832	4.36438	-18.4997	1.93446e-17	2.53248e-15	29.8463
ENOX1	-1.32012	5.41483	-8.67286	1.70924e-09	1.36619e-08	11.3079
C2orf15	-1.32723	3.86033	-12.0677	9.82474e-13	2.38471e-11	18.8873
LOC644090	-1.32919	5.51458	-5.3387	1.03568e-05	3.1653e-05	2.51734
MACROD1	-1.32946	5.72225	-11.0878	7.30925e-12	1.2748e-10	16.8487
APOH	-1.33011	5.9997	-6.0326	1.54787e-06	5.71139e-06	4.42323
BDKRB2	-1.33019	6.83108	-4.39711	0.000138639	0.000337111	-0.0613212
ECHDC3	-1.33402	9.96485	-5.72483	3.58466e-06	1.2225e-05	3.57985
PPM1E	-1.3347	3.67509	-8.57769	2.15239e-09	1.67912e-08	11.074
RBM11	-1.33527	3.17372	-12.9665	1.71557e-13	5.44043e-12	20.659
KCNJ16	-1.33656	9.0148	-4.97198	2.84817e-05	7.95251e-05	1.50806
HECW1	-1.33732	4.55783	-16.7124	2.77709e-16	2.43126e-14	27.1635
TCEAL7	-1.33823	4.60548	-7.06754	9.75284e-08	4.8005e-07	7.21072
TYRO3	-1.33917	5.10252	-14.83	5.99144e-15	3.10736e-13	24.0592
GLTPD2	-1.34249	4.76426	-7.23157	6.3581e-08	3.29502e-07	7.64329
SIM2	-1.34737	4.42431	-13.8244	3.51084e-14	1.38313e-12	22.2681
ABHD14B	-1.34996	8.63271	-6.85773	1.6933e-07	7.90722e-07	6.6533
LLGL2	-1.35121	6.38965	-9.53894	2.21592e-10	2.34117e-09	13.3823
ST6GALNAC3	-1.35166	6.16328	-6.54379	3.89992e-07	1.65892e-06	5.81135
NAP1L3	-1.35194	5.13007	-4.30695	0.000177427	0.000422599	-0.304649
STEAP2	-1.3535	6.96853	-6.8698	1.64018e-07	7.68545e-07	6.68548
CMTM4	-1.35577	7.42375	-11.5143	3.00966e-12	6.13491e-11	17.7502
GPT2	-1.35591	6.30992	-5.6836	4.0133e-06	1.35047e-05	3.46657
NAGS	-1.35608	6.26251	-4.8903	3.56833e-05	9.76763e-05	1.28374
RBPMS2	-1.35743	7.08254	-7.29471	5.39718e-08	2.85481e-07	7.80903
KCNK5	-1.35777	7.31577	-4.55793	8.91627e-05	0.000225421	0.375031
2-Msrx	-1.35782	8.52717	-4.50044	0.000104422	0.000260465	0.218727
LONRF2	-1.36205	4.2853	-7.79172	1.51131e-08	9.3007e-08	9.09771
FABP3	-1.36593	7.87706	-3.9073	0.000524569	0.00113633	-1.36872
CHN2	-1.36628	5.66544	-11.8514	1.5155e-12	3.45345e-11	18.4471
SEPHS2	-1.37002	10.7648	-11.0435	8.02416e-12	1.371e-10	16.7539
GABRB2	-1.37091	4.05872	-8.73337	1.47713e-09	1.20704e-08	11.456
PHYHIP	-1.37112	5.04126	-13.1246	1.27328e-13	4.19362e-12	20.9615
VAT1L	-1.3724	4.96505	-5.69402	3.90032e-06	1.31656e-05	3.49521
ANK3	-1.37659	7.37259	-4.37196	0.000148522	0.000358968	-0.129279
TSPAN33	-1.3767	8.41989	-9.68346	1.59098e-10	1.75608e-09	13.7189
CLEC4GP1	-1.37708	4.20664	-14.0216	2.46341e-14	1.00329e-12	22.6272
CLUL1	-1.37711	3.88366	-10.6232	1.97034e-11	2.97453e-10	15.8411
CRYL1	-1.37712	10.0578	-6.86371	1.66677e-07	7.79578e-07	6.66924
MRAP2	-1.37757	4.97511	-7.80881	1.44737e-08	8.95524e-08	9.14151
SLC5A10	-1.37966	8.29355	-2.88818	0.00731381	0.0124953	-3.90342
S100A14	-1.38012	5.73154	-10.3141	3.86809e-11	5.20641e-10	15.1557
GLYCTK	-1.38133	6.47337	-11.9262	1.30363e-12	3.05333e-11	18.6001
SCN7A	-1.38268	3.20994	-26.3519	1.37124e-21	6.68837e-19	39.35
FMO4	-1.38284	7.61319	-6.37969	6.05542e-07	2.45355e-06	5.36784
LINC00671	-1.38312	5.95131	-4.57848	8.42634e-05	0.000213826	0.430981
AZGP1P1	-1.38358	4.40356	-13.7321	4.14943e-14	1.60995e-12	22.0987
LOC400043	-1.38456	8.22679	-4.8101	4.45198e-05	0.000119532	1.06381
CUBN	-1.38696	10.1227	-2.63709	0.0133811	0.0216169	-4.46831
AKR1A1	-1.38738	10.9135	-10.8118	1.31331e-11	2.1052e-10	16.2533
C6orf123	-1.38918	4.26553	-8.46918	2.80347e-09	2.11224e-08	10.8058
MUC13	-1.38927	5.14269	-6.7767	2.09807e-07	9.53653e-07	6.43687
RAPGEF3	-1.38982	6.17631	-10.1651	5.37871e-11	6.87387e-10	14.8207
LINC00959	-1.39096	5.91639	-11.7232	1.96399e-12	4.28025e-11	18.1838
PIP	-1.39119	5.19696	-19.7584	3.36763e-18	6.01053e-16	31.6005
OGN	-1.39303	4.16398	-3.87106	0.000578195	0.00124199	-1.46379
PLLP	-1.39513	7.80271	-6.81394	1.90107e-07	8.75177e-07	6.53642
TNMD	-1.39726	4.37822	-3.29248	0.00264899	0.00495841	-2.93766
WLS	-1.39737	8.26138	-7.64113	2.21544e-08	1.29673e-07	8.7103
CLDN19	-1.4056	5.82683	-12.4593	4.54299e-13	1.2376e-11	19.6705
SLC25A48	-1.40617	5.63486	-7.97741	9.4679e-09	6.15353e-08	9.57161
CCDC64	-1.4083	7.07219	-8.38367	3.45641e-09	2.53792e-08	10.5934
PKLR	-1.41382	5.82667	-6.9683	1.26533e-07	6.07346e-07	6.9476
SDC1	-1.41402	9.13234	-5.49038	6.82163e-06	2.1805e-05	2.93505
MAMDC2	-1.41542	4.38431	-5.83989	2.61685e-06	9.17174e-06	3.89566
LRRN2	-1.41555	4.11028	-20.5356	1.2e-18	2.56075e-16	32.6333
CHRDL1	-1.41672	6.73731	-2.25195	0.0321916	0.0480458	-5.27146
[truncated: 617 more rows]

## Sheet: stage four
genesymbol	logFC	AveExpr	t	P.Value	adj.P.Val	B
TNFAIP6	4.89773	5.74877	7.52654	2.03779e-08	3.27165e-07	9.1664
NPTX2	4.87223	5.86571	6.30665	5.69551e-07	4.77016e-06	5.84225
KISS1R	4.39412	5.54708	5.4374	6.58079e-06	3.64067e-05	3.4101
LOC102659288	4.35006	4.7568	5.92049	1.68046e-06	1.16186e-05	4.76533
CTHRC1	4.33985	6.55121	6.33632	5.24345e-07	4.46642e-06	5.92465
CP	4.27	6.74344	5.4074	7.16491e-06	3.91519e-05	3.32583
PLA2G7	4.12518	4.85599	10.2363	2.3808e-11	1.57842e-09	15.9124
PTHLH	4.0831	4.63844	6.5692	2.74704e-07	2.65829e-06	6.56905
ANGPTL4	4.07344	7.90079	9.89174	5.32814e-11	2.8977e-09	15.1088
CCL18	4.06422	5.87508	8.85491	6.60486e-10	2.13418e-08	12.5944
ADAMDEC1	4.01657	4.92919	6.80051	1.45251e-07	1.58615e-06	7.20478
TMEM45A	3.85821	6.60238	5.3123	9.38259e-06	4.92065e-05	3.05876
ENO2	3.85092	6.91698	9.11814	3.4394e-10	1.28576e-08	13.2465
NDUFA4L2	3.78525	7.94371	6.10384	1.00407e-06	7.60703e-06	5.27767
PRIMA1	3.74314	6.08531	7.01037	8.1849e-08	1.00585e-06	7.77737
HILPDA	3.6868	8.73874	7.54618	1.93393e-08	3.14432e-07	9.21868
VCAN	3.63658	7.45496	6.68755	1.98148e-07	2.05428e-06	6.8949
FABP5	3.6234	7.02658	8.58492	1.30199e-09	3.66887e-08	11.916
CA9	3.58848	7.23688	8.77072	8.15312e-10	2.52303e-08	12.3839
CDCA2	3.47538	5.08268	8.4882	1.6642e-09	4.48666e-08	11.6707
LOX	3.44499	6.10185	7.3576	3.2015e-08	4.69477e-07	8.71497
C3	3.40343	10.6473	5.91293	1.71659e-06	1.18007e-05	4.74417
EGLN3	3.32674	7.13304	7.87558	8.10006e-09	1.54793e-07	10.0886
TGFBI	3.3058	9.71887	5.66875	3.41856e-06	2.10878e-05	4.05974
COL23A1	3.29463	6.7032	6.88158	1.16322e-07	1.32387e-06	7.42646
APOC1	3.27403	8.1318	8.01857	5.57472e-09	1.16061e-07	10.4621
RRM2	3.23785	5.45002	10.3844	1.69212e-11	1.1831e-09	16.2529
NEFL	3.23434	5.82699	7.53102	2.01362e-08	3.23791e-07	9.17832
NETO2	3.19913	5.91197	7.07386	6.88736e-08	8.71492e-07	7.94973
IGFBP3	3.18249	10.0746	7.25481	4.22116e-08	5.82321e-07	8.43873
LINC00887	3.11808	4.59132	7.03819	7.58828e-08	9.46733e-07	7.85294
MAP3K7CL	3.09717	5.62575	9.17094	3.02079e-10	1.16983e-08	13.3761
GPR65	3.04939	5.57397	7.36525	3.13649e-08	4.62593e-07	8.73547
LPCAT1	3.04222	8.18662	8.85522	6.59966e-10	2.13418e-08	12.5952
C1QB	3.02864	8.4763	6.51311	3.20854e-07	3.01792e-06	6.4142
CTSS	2.91459	7.17618	6.97335	9.05336e-08	1.09708e-06	7.67668
GPNMB	2.90022	7.31151	7.50158	2.178e-08	3.45345e-07	9.0999
CAV1	2.87293	8.38394	6.4941	3.38205e-07	3.15648e-06	6.3617
CXCL9	2.87112	7.16967	4.79056	4.11875e-05	0.000171602	1.59809
CXCL11	2.85812	4.06731	6.12165	9.55196e-07	7.32348e-06	5.32734
COL21A1	2.84506	4.86045	7.12621	5.97544e-08	7.74765e-07	8.09157
ANGPT2	2.83936	5.24601	6.71553	1.83456e-07	1.92732e-06	6.97177
IRX3	2.83758	9.67524	7.40755	2.80025e-08	4.22429e-07	8.84877
CXCL13	2.82197	4.69874	4.39918	0.000124128	0.000438731	0.514903
PLOD2	2.81861	8.80296	8.68126	1.02085e-09	3.0309e-08	12.1592
FCGR1B	2.81152	6.16124	6.31665	5.53883e-07	4.66757e-06	5.87004
KCNJ2	2.80213	5.92803	8.9737	4.91466e-10	1.71423e-08	12.8898
C5orf46	2.78122	5.45077	4.39254	0.000126459	0.000446157	0.496691
C1S	2.77684	8.15545	5.51219	5.32406e-06	3.04917e-05	3.62018
SEMA5B	2.77563	7.68527	7.78182	1.03629e-08	1.88205e-07	9.84228
BIRC3	2.76577	7.37058	7.0842	6.69665e-08	8.49986e-07	7.97777
CSTA	2.75715	6.46318	5.78266	2.47811e-06	1.61266e-05	4.37926
BCL2A1	2.75297	5.36326	6.98237	8.83355e-08	1.07589e-06	7.70122
NUS1P3	2.73471	5.44505	12.4059	2.09822e-13	3.98002e-11	20.6166
LOC101060391	2.72129	5.02394	4.6337	6.41617e-05	0.000249273	1.16213
PYCARD	2.69619	7.11798	7.36794	3.11392e-08	4.59926e-07	8.74268
MOCOS	2.69527	4.636	12.48	1.80267e-13	3.5171e-11	20.7669
CYP2J2	2.65408	7.25347	3.41789	0.00182019	0.00449257	-2.08732
C1QC	2.65114	8.57651	6.01711	1.28072e-06	9.32035e-06	5.03551
GAS6-AS1	2.61042	4.32597	14.9407	1.62415e-15	8.53139e-13	25.4066
UHRF1	2.59951	5.1422	10.7708	7.03396e-12	5.97916e-10	17.1275
SLC43A3	2.5995	6.00715	11.6123	1.10874e-12	1.32056e-10	18.9652
CCL5	2.59643	7.36073	5.30328	9.6258e-06	5.02359e-05	3.03343
RCN1	2.59327	8.57682	11.4229	1.66788e-12	1.79832e-10	18.5594
RAD51AP1	2.58936	4.21034	11.1583	2.972e-12	2.87191e-10	17.985
RGS1	2.55798	6.08983	6.783	1.52401e-07	1.64928e-06	7.15682
HTRA4	2.55003	4.27232	8.3849	2.16588e-09	5.59298e-08	11.4073
LINC00462	2.54798	4.95876	6.34961	5.05294e-07	4.3344e-06	5.96152
APOBEC3C	2.52969	6.54926	12.9018	7.68863e-14	1.69365e-11	21.6101
TIMP1	2.52707	10.2307	6.85121	1.26402e-07	1.41354e-06	7.34351
GZMK	2.52687	6.64563	4.9083	2.95104e-05	0.000129122	1.92657
OLFML2B	2.5045	5.97565	6.78355	1.52172e-07	1.64855e-06	7.15833
INHBB	2.49608	6.85495	6.30641	5.69931e-07	4.77097e-06	5.84159
GZMA	2.49277	6.17105	4.9097	2.93929e-05	0.000128718	1.9305
CXCL10	2.48704	7.27109	4.82754	3.7095e-05	0.000156816	1.70115
EOMES	2.48494	5.68294	6.10339	1.00535e-06	7.61373e-06	5.2764
CXCR4	2.47288	8.12518	5.40446	7.2248e-06	3.94581e-05	3.31758
LY96	2.47106	6.70738	5.68236	3.28955e-06	2.04211e-05	4.09794
TMEM91	2.47106	6.8364	7.90514	7.49641e-09	1.45582e-07	10.166
PTGS1	2.46853	6.18931	7.46959	2.37213e-08	3.68705e-07	9.01458
FABP7	2.46224	4.62178	3.0323	0.00494029	0.0106844	-3.03529
CD2	2.44559	6.52465	5.08629	1.78152e-05	8.42287e-05	2.42465
ERV3-2	2.44362	6.80501	6.64897	2.20385e-07	2.22295e-06	6.7888
IL20RB	2.43249	4.79058	4.05921	0.000320108	0.000991944	-0.409726
TNFSF13B	2.43008	7.19503	5.78791	2.44169e-06	1.59351e-05	4.39397
PRELID2	2.41338	5.59244	11.3252	2.06253e-12	2.15576e-10	18.3483
EZH2	2.40472	4.50924	7.92292	7.15561e-09	1.41133e-07	10.2125
GPR183	2.40224	5.99823	6.07845	1.07817e-06	8.05444e-06	5.20681
DDIT4	2.40164	9.72281	7.84558	8.76326e-09	1.64399e-07	10.0099
P2RX7	2.39869	5.20508	7.98901	6.02103e-09	1.23594e-07	10.3851
DDB2	2.39633	7.07768	9.14662	3.20676e-10	1.22335e-08	13.3165
PPP1R3C	2.39438	6.03445	7.12923	5.92683e-08	7.68949e-07	8.09973
PYGL	2.39416	7.38104	8.60271	1.2447e-09	3.5385e-08	11.961
ITK	2.39311	5.17565	5.8056	2.32283e-06	1.52661e-05	4.44355
LINC01127	2.39157	5.01194	4.41102	0.000120071	0.000426751	0.547437
SPAG4	2.39039	6.96044	6.45193	3.8018e-07	3.45076e-06	6.24506
TM6SF1	2.38655	5.23365	7.46616	2.39392e-08	3.70687e-07	9.00544
CPE	2.38239	8.15201	5.37958	7.7529e-06	4.18514e-05	3.2477
LGALS1	2.37136	10.2411	7.36448	3.14298e-08	4.62883e-07	8.7334
ENPP3	2.36875	7.71286	4.37335	0.000133448	0.000466967	0.444041
IGJ	2.36319	6.88248	3.0002	0.00535763	0.0114664	-3.11161
APBB1IP	2.34408	6.02392	10.3899	1.67114e-11	1.17243e-09	16.2653
MS4A7	2.34173	7.18729	6.25937	6.49854e-07	5.30395e-06	5.71086
LYZ	2.34165	8.1152	3.74614	0.000755178	0.00208836	-1.24174
TMEM255A	2.32819	4.21647	5.69947	3.13429e-06	1.95998e-05	4.14594
GBP5	2.32713	5.40993	7.13576	5.82294e-08	7.59318e-07	8.11739
TOP2A	2.32468	3.77272	10.196	2.61401e-11	1.68398e-09	15.8192
IL10RA	2.31779	7.1097	5.52294	5.16447e-06	2.97356e-05	3.65036
FCER1G	2.31379	7.49011	5.57493	4.45763e-06	2.62335e-05	3.79636
PRAME	2.31206	5.62005	6.26609	6.37777e-07	5.22829e-06	5.72955
NINJ2	2.31093	4.6504	9.1458	3.21318e-10	1.22352e-08	13.3145
CHIT1	2.30572	4.55998	7.53121	2.01259e-08	3.23791e-07	9.17884
SLFN13	2.30484	4.28713	7.47952	2.31005e-08	3.60291e-07	9.04107
NOL3	2.30231	7.19816	8.18962	3.57753e-09	8.36635e-08	10.9055
VIM	2.29055	8.69333	7.55864	1.87089e-08	3.05395e-07	9.2518
LOC100132891	2.28956	5.24214	5.87563	1.90671e-06	1.29042e-05	4.63975
COL1A2	2.28229	7.66315	4.42395	0.000115794	0.000414641	0.582954
ST8SIA4	2.28086	4.12249	8.64276	1.12492e-09	3.27811e-08	12.0622
HAVCR1	2.26924	5.44838	4.57473	7.57719e-05	0.000287031	0.998787
CASP1	2.26483	7.09796	6.81832	1.38325e-07	1.52269e-06	7.25354
PBK	2.26177	3.99161	8.12645	4.21252e-09	9.48327e-08	10.7422
ABCA17P	2.26096	4.75702	6.41119	4.25739e-07	3.77726e-06	6.13225
GLIPR1	2.25982	6.05822	6.37894	4.65681e-07	4.06647e-06	6.04288
SLFN11	2.25482	6.06653	7.57472	1.79257e-08	2.95385e-07	9.29454
TLR7	2.25461	5.14507	7.90346	7.52936e-09	1.46067e-07	10.1616
LINC01094	2.25334	4.08092	6.87854	1.17291e-07	1.33194e-06	7.41818
IFI16	2.25229	7.85027	6.34757	5.08168e-07	4.35214e-06	5.95587
CRTAM	2.24773	4.24284	5.8127	2.27679e-06	1.5012e-05	4.46344
LDLRAD3	2.24716	5.89766	9.09839	3.61086e-10	1.33043e-08	13.1979
AHNAK2	2.24627	5.25925	8.12224	4.25871e-09	9.52445e-08	10.7313
DUXAP10	2.24529	3.88305	7.8462	8.74923e-09	1.64287e-07	10.0115
RNASE6	2.24478	7.3519	5.84173	2.09786e-06	1.39899e-05	4.54478
ADA	2.23472	5.92715	6.05988	1.1358e-06	8.41549e-06	5.15498
FAM57A	2.2342	6.39078	7.54413	1.94455e-08	3.15658e-07	9.21321
CD86	2.22862	5.14114	7.51227	2.11678e-08	3.37466e-07	9.12839
PAG1	2.2279	6.02388	7.25743	4.19142e-08	5.80172e-07	8.44579
LAPTM5	2.22387	8.88904	5.26352	1.07749e-05	5.517e-05	2.92181
ADM	2.22185	10.1314	6.61917	2.39273e-07	2.37638e-06	6.70678
RASSF2	2.22084	6.40839	5.98437	1.40412e-06	1.00471e-05	4.944
GBP2	2.2187	7.0985	5.54022	4.91778e-06	2.84995e-05	3.6989
PLK2	2.21833	7.50263	8.13389	4.13213e-09	9.37327e-08	10.7615
LINC00240	2.20528	4.11707	7.71506	1.23582e-08	2.162e-07	9.66627
LY86	2.19591	6.8345	6.06814	1.1098e-06	8.24198e-06	5.17803
KIF20A	2.19146	4.15731	7.66231	1.42084e-08	2.41755e-07	9.52682
FPR3	2.18999	5.42282	7.13615	5.8167e-08	7.58986e-07	8.11847
DIRAS2	2.18527	3.83497	7.76743	1.07633e-08	1.93929e-07	9.80439
MTCP1	2.1805	4.56744	6.11133	9.83215e-07	7.48778e-06	5.29856
RNASET2	2.18027	6.58145	8.42556	1.95221e-09	5.15374e-08	11.5111
MIR210HG	2.17735	5.61952	8.58918	1.28805e-09	3.63957e-08	11.9268
UBE2C	2.17301	5.30949	8.74677	8.65808e-10	2.6355e-08	12.3239
HCLS1	2.17036	7.75925	5.26314	1.07867e-05	5.52106e-05	2.92073
LOC101928173	2.16837	4.13075	14.8318	1.97541e-15	9.63532e-13	25.2148
IKBIP	2.16296	5.77572	8.06274	4.96964e-09	1.06383e-07	10.5769
BUB1B	2.14851	4.43536	8.21887	3.31746e-09	7.86592e-08	10.981
PGBD5	2.13707	5.89017	6.31378	5.58328e-07	4.69729e-06	5.86208
PDK1	2.12899	5.90717	9.65675	9.31087e-11	4.51996e-09	14.5516
APOLD1	2.12743	7.60378	4.7217	5.00428e-05	0.000201243	1.40645
PRC1	2.11919	5.04928	7.0272	7.81844e-08	9.7013e-07	7.82311
RTP4	2.11911	6.38062	6.37179	4.75039e-07	4.13058e-06	6.02305
GPX8	2.11491	6.30365	7.47953	2.30995e-08	3.60291e-07	9.04112
EVI2A	2.10876	6.24822	4.59385	7.17944e-05	0.000274553	1.05173
IRF2	2.10874	6.34078	15.5129	5.91123e-16	4.03658e-13	26.395
CD97	2.10481	7.49088	6.4261	4.08457e-07	3.654e-06	6.17355
DTL	2.10145	4.06147	8.95293	5.17465e-10	1.78164e-08	12.8383
LOC100507535	2.09673	5.50291	9.95997	4.53701e-11	2.57466e-09	15.2692
C10orf99	2.09662	4.58925	3.42397	0.00179119	0.00442902	-2.07196
RAB42	2.09626	6.65856	7.07421	6.88075e-08	8.71193e-07	7.95069
ENTPD1	2.09212	5.62994	8.34661	2.3889e-09	6.0568e-08	11.3093
IDO1	2.08854	6.60992	5.73522	2.8332e-06	1.80307e-05	4.24624
SAMHD1	2.08659	6.55014	6.57201	2.72578e-07	2.64271e-06	6.5768
IGSF6	2.08614	4.17122	7.03722	7.60833e-08	9.48079e-07	7.85031
AIM2	2.08123	4.92812	6.15876	8.60907e-07	6.71356e-06	5.4308
HLA-DPA1	2.07683	9.78278	5.84719	2.06579e-06	1.38036e-05	4.56009
GXYLT2	2.0744	5.46044	5.28663	1.00912e-05	5.21776e-05	2.98669
TYROBP	2.07423	8.6662	5.23371	1.17259e-05	5.92103e-05	2.83813
NFE2L3	2.07323	4.89469	6.29132	5.94418e-07	4.92807e-06	5.79968
PF4V1	2.07227	3.71842	4.10575	0.000281402	0.000887847	-0.284293
TNFSF9	2.06966	4.227	9.13745	3.27982e-10	1.24197e-08	13.2939
CCR5	2.06887	7.04434	5.83213	2.15541e-06	1.43177e-05	4.51789
C1QA	2.06458	8.80377	4.85676	3.41494e-05	0.000146541	1.78266
HS3ST2	2.06336	5.17994	6.04959	1.16909e-06	8.60581e-06	5.12624
FAM129A	2.06142	6.62284	6.22614	7.13041e-07	5.72389e-06	5.61844
THEMIS2	2.06103	6.32201	5.67259	3.38169e-06	2.09171e-05	4.07051
GBP4	2.06005	5.06755	8.93594	5.39762e-10	1.83311e-08	12.7961
CCL4	2.05794	7.08428	6.51429	3.19803e-07	3.0094e-06	6.41748
FAP	2.05439	4.26554	9.2434	2.52947e-10	1.01407e-08	13.5535
SPINK13	2.0461	4.86251	5.09381	1.74392e-05	8.26988e-05	2.44573
NOV	2.03877	5.36832	7.18403	5.10986e-08	6.80628e-07	8.24787
MIR34A	2.03874	5.75389	10.6439	9.36397e-12	7.52275e-10	16.8425
CD3D	2.03126	6.90551	6.01086	1.30341e-06	9.46193e-06	5.01804
CFH	2.02519	6.60028	4.3996	0.000123978	0.00043843	0.516084
SORCS3	2.02304	3.66573	4.41759	0.000117877	0.000420429	0.565493
TUBB6	2.01932	7.96435	10.7274	7.75647e-12	6.51226e-10	17.0301
TRBC1	2.01826	7.39899	4.1227	0.00026848	0.000852992	-0.238515
HK1	2.0133	8.32961	10.2438	2.33989e-11	1.55633e-09	15.9297
TRIB3	2.01229	6.43054	6.77124	1.57405e-07	1.69242e-06	7.12459
NKG7	2.01158	6.02992	5.52553	5.12677e-06	2.95435e-05	3.65763
PSMB9	2.00842	8.21822	5.67225	3.38489e-06	2.09236e-05	4.06957
CAV2	2.00557	7.10055	7.50315	2.16886e-08	3.44162e-07	9.1041
NOD2	2.00531	4.49772	7.02853	7.79034e-08	9.67229e-07	7.8267
ANLN	2.00284	3.61277	6.88509	1.15211e-07	1.31414e-06	7.43604
TREM2	2.00125	6.9123	7.22113	4.62251e-08	6.26301e-07	8.348
GIMAP2	1.99882	6.75256	4.90394	2.98771e-05	0.000130448	1.91439
C19orf33	1.99542	7.48916	5.32735	8.99043e-06	4.74563e-05	3.10103
STK39	1.99471	7.98289	7.66739	1.40185e-08	2.39318e-07	9.54027
TAP1	1.98338	8.08803	6.68607	1.98959e-07	2.06061e-06	6.89083
CD163	1.98	6.73318	5.85702	2.00935e-06	1.35003e-05	4.58763
C8orf22	1.97943	3.88746	3.64909	0.000981883	0.00262974	-1.49492
CFD	1.97876	7.33153	4.30693	0.000160712	0.000548177	0.262227
GAL3ST1	1.9756	8.14498	4.9946	2.3106e-05	0.000105002	2.16789
TLR3	1.97472	6.43311	6.4935	3.38768e-07	3.16029e-06	6.36004
HLA-DMB	1.97106	9.1834	7.43524	2.60024e-08	3.97526e-07	8.92282
CD247	1.96624	5.71667	6.00829	1.31285e-06	9.5103e-06	5.01086
TYMP	1.96603	6.03181	6.4018	4.36996e-07	3.86541e-06	6.10624
HLA-DPB1	1.95393	7.89902	7.96952	6.33526e-09	1.28754e-07	10.3342
PLAC8	1.95291	5.72421	4.1608	0.000241529	0.000778839	-0.135431
GAS2L3	1.94833	7.30304	5.23231	1.17725e-05	5.94312e-05	2.8342
C16orf54	1.94561	4.73925	3.98581	0.00039201	0.00118186	-0.60669
CDCA7L	1.94047	6.14567	5.79336	2.40443e-06	1.5717e-05	4.40924
KIF14	1.9393	3.46647	8.70436	9.63178e-10	2.88897e-08	12.2173
C1orf162	1.93754	7.45233	5.20274	1.28027e-05	6.36129e-05	2.75123
CSPG4	1.92979	4.63011	8.78209	7.92412e-10	2.46403e-08	12.4124
CD70	1.92696	6.92722	7.38378	2.98442e-08	4.45618e-07	8.78513
PRKCDBP	1.92692	6.79864	5.4683	6.029e-06	3.38291e-05	3.4969
ALOX5AP	1.92498	7.57047	5.52838	5.08554e-06	2.93637e-05	3.66564
LAX1	1.92203	4.68679	6.83145	1.33434e-07	1.48159e-06	7.28947
VAV1	1.92095	5.52022	7.22081	4.62657e-08	6.26437e-07	8.34712
NUPR1	1.91858	8.89953	6.41611	4.19956e-07	3.73566e-06	6.14588
LINC00621	1.91786	8.96842	8.56263	1.37761e-09	3.84089e-08	11.8596
CLEC4A	1.91571	4.95358	5.78638	2.45228e-06	1.5994e-05	4.38967
LILRB2	1.91282	5.38294	6.38439	4.58676e-07	4.01386e-06	6.05798
MICB	1.91081	5.29035	6.52455	3.1084e-07	2.94672e-06	6.44582
PCDHGA8	1.90918	5.03356	15.2414	9.51433e-16	5.73266e-13	25.9299
TLR2	1.90796	7.4963	6.27978	6.13863e-07	5.0545e-06	5.76762
ITGB2	1.90677	6.48344	6.37778	4.67185e-07	4.07613e-06	6.03966
CRIP1	1.90621	7.36379	5.90826	1.7393e-06	1.19328e-05	4.73111
TLR8	1.90591	4.6317	5.85417	2.02556e-06	1.35696e-05	4.57964
DGCR5	1.90164	5.94874	5.8859	1.85233e-06	1.25944e-05	4.66851
TPX2	1.90161	4.49895	6.4621	3.69598e-07	3.38017e-06	6.2732
C1R	1.89868	8.93401	3.97916	0.00039926	0.00120106	-0.624487
FN1	1.89768	7.46636	6.11984	9.60058e-07	7.3475e-06	5.32228
TIGIT	1.89724	4.59193	8.77675	8.03082e-10	2.48895e-08	12.399
CCND1	1.89623	8.0056	6.13492	9.20332e-07	7.10129e-06	5.36435
LOC221272	1.89622	4.63533	12.2811	2.7129e-13	4.79107e-11	20.362
HIST1H2BK	1.89583	8.49718	6.36196	4.88217e-07	4.22366e-06	5.99578
MTCL1	1.89469	7.38241	6.54671	2.92341e-07	2.80696e-06	6.507
CLEC5A	1.89146	3.93039	5.3651	8.07773e-06	4.33081e-05	3.20704
ZNF395	1.88385	7.01708	6.8224	1.36787e-07	1.509e-06	7.2647
TRIM59	1.88285	4.34033	7.37422	3.06189e-08	4.54206e-07	8.75952
SAMSN1	1.87997	4.83162	6.9547	9.52573e-08	1.13777e-06	7.6259
CD300LF	1.87982	5.61699	6.64691	2.2164e-07	2.23271e-06	6.78314
KCNK3	1.87968	5.77249	4.58959	7.26628e-05	0.000277305	1.03992
HLA-DMA	1.8785	8.90135	6.51754	3.16938e-07	2.99483e-06	6.42645
TRIM22	1.87271	8.86848	6.33004	5.33608e-07	4.53212e-06	5.9072
CCNB1	1.87037	4.83262	8.77912	7.98332e-10	2.47797e-08	12.405
IFI27	1.86913	8.64173	5.89351	1.81306e-06	1.23684e-05	4.68981
CCL28	1.86752	5.27709	5.29619	9.82139e-06	5.10663e-05	3.01352
PNCK	1.86697	6.68236	4.23037	0.000199007	0.000658725	0.0534676
HK2	1.86691	4.82663	9.37916	1.81718e-10	7.75559e-09	13.8839
PCDHB14	1.86097	4.68086	7.2888	3.8518e-08	5.4593e-07	8.53021
MS4A6A	1.85813	6.75999	6.00984	1.30711e-06	9.48212e-06	5.01521
PCDHB16	1.85718	5.09741	4.08303	0.000299688	0.000936027	-0.345583
UBASH3A	1.85541	4.41344	8.28442	2.80231e-09	6.86699e-08	11.1497
PABPC4L	1.85264	5.22316	5.22156	1.21373e-05	6.0862e-05	2.80402
MPEG1	1.85246	7.15949	5.0406	2.02805e-05	9.41034e-05	2.29665
KIAA0101	1.84825	5.37779	8.04922	5.14738e-09	1.09501e-07	10.5418
IGLL5	1.84656	6.68314	3.46974	0.00158662	0.00398424	-1.95588
GJA1	1.84619	9.206	5.17719	1.37656e-05	6.7529e-05	2.67952
CDH13	1.84465	5.32784	7.8017	9.83474e-09	1.80089e-07	9.89458
RAC2	1.84118	6.66607	5.16164	1.43864e-05	7.02718e-05	2.6359
RGS18	1.84054	5.18636	4.62776	6.52467e-05	0.000252817	1.14565
COL6A3	1.83901	7.18963	3.55595	0.00126092	0.003264	-1.73549
LOC154761	1.83224	6.27808	7.24494	4.335e-08	5.94821e-07	8.41215
DUSP4	1.83115	4.87489	7.54115	1.96001e-08	3.17665e-07	9.20529
TNNT1	1.82887	4.01822	4.71346	5.12228e-05	0.000205232	1.38352
LILRA6	1.82534	5.04425	16.782	6.95085e-17	7.95037e-14	28.4779
RHBDF2	1.82379	6.49071	8.14456	4.01949e-09	9.16963e-08	10.7891
SCD	1.82306	6.32319	8.26108	2.97566e-09	7.17169e-08	11.0897
TLR1	1.81878	5.42067	5.54396	4.86609e-06	2.82398e-05	3.70939
PSMB8	1.81842	8.51864	7.17305	5.2638e-08	6.99315e-07	8.21823
SACS	1.80508	5.67947	5.93597	1.60882e-06	1.12256e-05	4.80865
BTN3A2	1.80481	7.51541	5.70993	3.04306e-06	1.91228e-05	4.17527
RNASE2	1.80457	4.63794	8.71256	9.43505e-10	2.83827e-08	12.238
E2F8	1.80313	3.41094	6.79512	1.47416e-07	1.60722e-06	7.19001
LOC153684	1.79839	6.09188	8.99986	4.60604e-10	1.62688e-08	12.9546
CD52	1.79479	6.8377	3.96717	0.000412663	0.00123666	-0.656549
SLAMF8	1.79447	5.60521	5.32822	8.9683e-06	4.73761e-05	3.10347
LOC101928152	1.79406	5.17903	4.90515	2.97747e-05	0.000130029	1.91777
ZBED6CL	1.79402	6.19291	10.1572	2.86062e-11	1.80316e-09	15.7293
HSPA6	1.79378	6.32509	5.59937	4.15973e-06	2.48879e-05	3.86498
LAMP3	1.79349	4.93782	4.3406	0.000146266	0.000505127	0.354315
LOC101928054	1.79235	4.48041	9.38779	1.77952e-10	7.64262e-09	13.9048
BHLHE41	1.78759	4.67557	8.66293	1.06911e-09	3.14681e-08	12.113
CCL20	1.78161	6.35514	2.99007	0.00549619	0.0117213	-3.13561
CD1D	1.78025	4.6573	4.78764	4.15289e-05	0.000172743	1.58997
PPFIA4	1.78011	5.24175	5.47594	5.89991e-06	3.32322e-05	3.51836
ITGA4	1.77356	4.50987	5.72851	2.88745e-06	1.83247e-05	4.2274
KIF2A	1.77337	5.67566	6.34952	5.05416e-07	4.3344e-06	5.96128
VSIG4	1.77233	7.91809	4.37457	0.000132991	0.000465719	0.447399
PLEKHG4	1.76908	5.72521	7.23322	4.47421e-08	6.10651e-07	8.38057
C10orf10	1.76881	7.73306	6.57663	2.69119e-07	2.62023e-06	6.58954
ALOX5	1.76451	5.82559	6.04533	1.18314e-06	8.69673e-06	5.11435
SOX11	1.76414	3.79593	6.05057	1.16589e-06	8.59149e-06	5.12897
MYC	1.76301	8.75956	6.76684	1.59317e-07	1.71057e-06	7.11254
MNDA	1.76054	7.11741	3.88682	0.000514539	0.00149622	-0.870564
NCKAP1L	1.75799	6.07356	6.46989	3.61699e-07	3.32276e-06	6.29474
MARCKS	1.75684	7.69003	6.11969	9.60447e-07	7.3475e-06	5.32188
CORO1A	1.75598	6.80016	4.45989	0.000104676	0.00038028	0.681843
TOX2	1.75494	4.49662	6.47443	3.57168e-07	3.28724e-06	6.30731
LCK	1.75444	5.95173	5.05407	1.95201e-05	9.11117e-05	2.33438
RARRES2	1.75369	9.73925	6.28919	5.97957e-07	4.95139e-06	5.79377
LOC101928335	1.74995	3.6983	5.67167	3.39048e-06	2.09461e-05	4.06793
CEP55	1.74873	3.42073	6.69308	1.95155e-07	2.0253e-06	6.91009
RAB37	1.74862	4.57948	5.94872	1.55214e-06	1.08969e-05	4.84432
TFPI2	1.74847	6.99297	2.59063	0.0145969	0.0274141	-4.04393
JAZF1	1.74706	5.47354	9.60734	1.04801e-10	4.98132e-09	14.4335
SLC15A3	1.74231	6.72995	7.2074	4.7972e-08	6.46124e-07	8.31094
TRIM9	1.74114	3.90057	7.75841	1.10224e-08	1.9721e-07	9.78061
LOC101927972	1.7408	3.70387	4.85989	3.38472e-05	0.000145366	1.79142
VLDLR	1.74056	7.35874	8.13074	4.16593e-09	9.41184e-08	10.7533
ABCA12	1.73966	3.22617	6.58163	2.65421e-07	2.59172e-06	6.60334
MYOF	1.73611	7.75256	9.36839	1.86534e-10	7.91165e-09	13.8577
IL7	1.73556	5.71994	6.28579	6.03668e-07	4.98861e-06	5.7843
FXYD5	1.73426	7.47708	5.73549	2.8311e-06	1.8023e-05	4.24697
KIAA0226L	1.73072	4.83176	5.60344	4.11205e-06	2.46747e-05	3.87642
HCK	1.72857	6.47855	5.07172	1.85666e-05	8.72777e-05	2.38384
LIPA	1.72028	10.1357	7.80343	9.79007e-09	1.79552e-07	9.89913
MCAM	1.71999	7.48276	5.66058	3.49845e-06	2.149e-05	4.03681
COL5A1	1.71577	5.54981	6.39932	4.40024e-07	3.88214e-06	6.09935
THBS2	1.71559	7.43831	4.13231	0.000261415	0.000833389	-0.212537
2016-03-01	1.71448	4.44248	6.08672	1.05343e-06	7.90785e-06	5.22991
FAM49A	1.71276	4.3871	7.6194	1.59198e-08	2.67541e-07	9.41315
SLA	1.71228	7.02564	5.29327	9.90301e-06	5.14123e-05	3.00532
H2BFS	1.71124	6.92218	8.12363	4.24338e-09	9.52072e-08	10.7349
PTGFRN	1.70779	6.42541	6.19242	7.83537e-07	6.2143e-06	5.52456
HLA-DRA	1.70626	11.2531	5.97915	1.42487e-06	1.0153e-05	4.9294
APOL1	1.70216	7.34556	5.12545	1.59419e-05	7.66814e-05	2.53442
ANXA4	1.70157	11.3952	8.08093	4.74034e-09	1.0309e-07	10.6242
GPR34	1.70026	6.7184	4.20853	0.000211495	0.000694228	-0.00592635
GFI1	1.69968	3.75504	12.0247	4.62543e-13	7.12455e-11	19.833
SCG5	1.69882	4.04881	4.56058	7.88537e-05	0.000297057	0.959656
GAPT	1.69826	4.0896	4.58397	7.38221e-05	0.000280735	1.02438
CEBPB	1.69787	10.2655	6.97625	8.9822e-08	1.09075e-06	7.68456
CDC20	1.69371	4.75771	7.41495	2.7453e-08	4.15687e-07	8.86858
BC036055 /// PREX2	1.69239	3.94293	8.29772	2.70812e-09	6.68431e-08	11.1839
SERPINE1	1.69004	6.3176	3.71613	0.000819213	0.00224328	-1.3203
VEGFA	1.688	9.30121	4.71366	5.11935e-05	0.000205155	1.38409
TMEM92	1.6878	5.00139	9.41292	1.67433e-10	7.26075e-09	13.9656
TMSB10	1.68674	12.3438	8.75286	8.5267e-10	2.60508e-08	12.3391
IL2RG	1.68495	6.10213	4.61063	6.84768e-05	0.000263786	1.09819
ISG20	1.68422	6.38236	6.15689	8.65434e-07	6.74374e-06	5.42558
GJC1	1.68288	4.345	9.26968	2.37216e-10	9.64206e-09	13.6176
NRG3	1.67885	3.92861	7.40726	2.80245e-08	4.22451e-07	8.84799
ADORA3	1.67684	5.04657	5.64789	3.6263e-06	2.21228e-05	4.00118
CD8A	1.67483	6.63046	3.86309	0.000549071	0.00158434	-0.933494
TNFAIP8L2	1.67421	5.31602	7.35999	3.181e-08	4.6781e-07	8.72139
PCED1B	1.67231	5.83707	5.3068	9.53014e-06	4.98428e-05	3.04332
TCIRG1	1.67188	6.81895	5.3064	9.54093e-06	4.98738e-05	3.0422
SRGN	1.6695	8.05665	5.80069	2.35519e-06	1.54395e-05	4.42981
DCLK1	1.66829	4.50266	4.47769	9.95684e-05	0.000363788	0.730875
GNB4	1.66724	5.92147	11.1729	2.87818e-12	2.79443e-10	18.0169
HCG4	1.66682	4.89753	6.05987	1.13584e-06	8.41549e-06	5.15495
COL3A1	1.66572	7.25476	3.46381	0.00161179	0.00403609	-1.97096
SCN4B	1.66404	4.11585	5.72758	2.89506e-06	1.83617e-05	4.22478
RPL22L1	1.66376	8.05273	5.92714	1.6493e-06	1.1434e-05	4.78393
TMEM44	1.66151	5.39366	7.06783	7.00101e-08	8.83168e-07	7.93338
MS4A4A	1.65984	6.99903	5.22099	1.21568e-05	6.09209e-05	2.80243
INHBE	1.65967	3.52141	4.24497	0.000191069	0.000636564	0.0932049
SASH3	1.6551	5.98614	5.50633	5.41326e-06	3.09159e-05	3.60371
DSN1	1.65382	5.60115	9.67666	8.87838e-11	4.35126e-09	14.5991
MT3	1.65374	5.76284	4.26401	0.000181183	0.000607781	0.145083
MELK	1.65366	5.56626	9.34652	1.96712e-10	8.25788e-09	13.8047
IGDCC4	1.65349	3.94574	3.14751	0.00368269	0.00827305	-2.7579
VWCE	1.65262	6.03886	6.3622	4.87883e-07	4.22256e-06	5.99647
HLA-F	1.65244	9.30742	5.89733	1.79367e-06	1.22565e-05	4.70051
DDX26B	1.64815	5.76408	8.0692	4.88691e-09	1.04941e-07	10.5937
FAM26F	1.64636	5.15243	5.12969	1.57512e-05	7.59422e-05	2.54632
SLC38A1	1.64499	6.98299	7.71249	1.24425e-08	2.16934e-07	9.65947
GPR171	1.6444	4.92235	3.99243	0.000384923	0.00116288	-0.588967
NCF4	1.64188	5.72818	5.3888	7.55272e-06	4.09092e-05	3.27361
HMCN1	1.64124	5.3563	4.38021	0.000130905	0.000459486	0.462867
ABCC1	1.63699	6.56058	6.48516	3.46697e-07	3.21668e-06	6.33697
CENPW	1.63691	5.4415	7.76313	1.0886e-08	1.9522e-07	9.79306
MCTP1	1.63501	4.24303	7.81432	9.51354e-09	1.75422e-07	9.92777
MLKL	1.63445	6.79754	6.9622	9.33307e-08	1.12337e-06	7.6463
ADORA2B	1.63401	4.21991	6.52385	3.11447e-07	2.94975e-06	6.44387
FNDC3B	1.62445	3.45464	13.0795	5.40158e-14	1.33321e-11	21.959
CD14	1.62333	8.81051	4.803	3.97626e-05	0.000166342	1.63276
CLGN	1.61989	3.39482	4.37876	0.00013144	0.000461074	0.458882
CD300A	1.61923	4.91914	8.36713	2.26662e-09	5.81151e-08	11.3618
PSTPIP1	1.61762	5.31577	7.58934	1.72425e-08	2.85784e-07	9.33338
ERO1L	1.61591	7.26205	7.05335	7.28189e-08	9.13513e-07	7.8941
TBXAS1	1.61403	5.04198	7.75029	1.12607e-08	2.00076e-07	9.75923
CLEC2B	1.61327	5.83784	4.70368	5.26582e-05	0.00021012	1.35634
ANXA2R	1.61287	5.22963	9.32561	2.0698e-10	8.60079e-09	13.7538
GBP1	1.61035	7.31734	6.08027	1.07265e-06	8.02571e-06	5.21191
COL6A2	1.60935	6.91188	5.75338	2.69158e-06	1.72744e-05	4.29717
IL7R	1.60832	6.74234	3.06551	0.00454114	0.0099444	-2.95589
CSF2RA	1.60625	4.78533	6.22708	7.11178e-07	5.71565e-06	5.62105
BTN3A3	1.60585	6.95205	4.94844	2.63371e-05	0.00011739	2.03875
CDC42EP5	1.60402	5.48399	4.31922	0.000155284	0.00053143	0.295818
SLC6A3	1.60017	5.88724	3.12597	0.00389193	0.00867196	-2.81019
LCP1	1.59965	7.4875	5.18771	1.33604e-05	6.59046e-05	2.70906
KIAA1551	1.59916	6.34515	6.08893	1.04694e-06	7.87359e-06	5.23605
TNFAIP8	1.59726	6.6089	6.54373	2.94763e-07	2.8257e-06	6.49877
CCR7	1.59481	4.78141	4.26261	0.000181894	0.000609864	0.141261
RNF166	1.59294	5.80241	6.10418	1.00312e-06	7.60259e-06	5.27862
MDK	1.59108	6.36994	6.0343	1.22035e-06	8.94456e-06	5.08354
HLA-G	1.58818	10.4026	6.47801	3.53645e-07	3.26047e-06	6.31719
CXCL16	1.58803	7.50803	6.13522	9.19565e-07	7.10072e-06	5.36518
APOBEC3B	1.58338	4.72846	5.67561	3.35294e-06	2.07706e-05	4.07898
FMOD	1.58036	6.22778	5.28899	1.00239e-05	5.19215e-05	2.99331
SLC16A6	1.58003	4.67211	6.5926	2.57497e-07	2.52638e-06	6.63357
NUF2	1.57987	3.13512	6.74073	1.71168e-07	1.82159e-06	7.04094
SIGLEC1	1.57955	6.01253	5.88512	1.8564e-06	1.26137e-05	4.66633
TNFRSF11A	1.57616	3.6921	7.69619	1.29902e-08	2.24902e-07	9.61642
PGF	1.57345	7.68476	3.83105	0.000599314	0.00170521	-1.01826
ACKR3	1.57311	5.15731	8.29107	2.75482e-09	6.77493e-08	11.1668
IFI44	1.57258	6.37086	5.95077	1.54323e-06	1.08473e-05	4.85004
IL10RB	1.57148	7.51174	9.26406	2.40493e-10	9.73664e-09	13.6039
SCG2	1.57127	3.68886	4.85226	3.45874e-05	0.000148234	1.7701
SERPING1	1.56924	9.96624	4.91863	2.86588e-05	0.000125826	1.95544
CLIC2	1.56649	5.70194	5.69693	3.15686e-06	1.97258e-05	4.13882
DEGS1	1.56619	9.35072	7.57448	1.79371e-08	2.95385e-07	9.2939
IFI44L	1.56331	7.39073	3.79283	0.000665144	0.00186729	-1.11907
DPEP2	1.56328	5.03337	5.60247	4.12337e-06	2.47179e-05	3.87369
FOXJ3	1.56299	6.49309	6.2794	6.14511e-07	5.0578e-06	5.76656
NDC80	1.56047	4.11344	4.64527	6.21009e-05	0.000242508	1.1942
COL15A1	1.55958	7.15077	3.56823	0.00122013	0.00317082	-1.7039
SLC27A3	1.55748	6.65251	8.14466	4.0185e-09	9.16963e-08	10.7893
HLA-DQB1	1.55721	6.02233	3.9249	0.000463506	0.00136467	-0.769297
HAMP	1.5567	5.07668	5.66905	3.41572e-06	2.1083e-05	4.06057
CD33	1.55645	5.30855	7.24423	4.34328e-08	5.95558e-07	8.41024
SSPN	1.55584	5.1387	6.53616	3.01006e-07	2.8681e-06	6.47788
FKBP11	1.55396	6.99714	7.11069	6.23218e-08	8.00957e-07	8.04956
TEX11	1.55227	4.3609	3.41942	0.00181285	0.00447608	-2.08346
ATP8B3	1.54863	3.8192	8.87358	6.30415e-10	2.06635e-08	12.641
ARL4C	1.54476	6.64742	4.67805	5.6611e-05	0.000223628	1.28517
ARL4A	1.54139	7.03298	9.33492	2.02342e-10	8.46808e-09	13.7765
VWF	1.53433	6.74407	5.65512	3.55293e-06	2.17464e-05	4.02147
TMEM173	1.53405	6.93921	5.57875	4.40962e-06	2.59958e-05	3.8071
PRR11	1.53229	7.81758	8.73208	8.98337e-10	2.72239e-08	12.287
CD38	1.53097	4.86433	5.21818	1.22539e-05	6.13175e-05	2.79456
TNFAIP3	1.53092	7.59068	5.16262	1.43465e-05	7.0127e-05	2.63865
ZFAS1	1.52951	8.6278	7.10233	6.37514e-08	8.17279e-07	8.02691
PCDHGA4	1.52613	5.47259	4.08572	0.00029746	0.000931176	-0.338322
STC2	1.52523	6.16526	4.26139	0.000182513	0.00061124	0.137942
KLHL6	1.52417	4.16594	6.57384	2.71207e-07	2.6344e-06	6.58183
CENPK	1.52063	3.57704	5.76294	2.61995e-06	1.68847e-05	4.32396
DOCK10	1.52016	4.59142	6.50447	3.28625e-07	3.07688e-06	6.39034
LINC00324	1.51934	5.20561	10.4247	1.5428e-11	1.10125e-09	16.345
OAS2	1.5187	4.59226	9.94457	4.70445e-11	2.64767e-09	15.233
TIMD4	1.51823	4.45316	4.08568	0.000297498	0.000931176	-0.338446
TRAC	1.51812	6.9977	4.83426	3.63961e-05	0.000154339	1.71989
KCNE4	1.5164	4.10096	6.79212	1.48635e-07	1.61792e-06	7.1818
BIRC7	1.51593	5.95383	4.08111	0.000301282	0.000940289	-0.350747
KIF4A	1.51461	4.17518	6.39982	4.39406e-07	3.87921e-06	6.10076
TRG-AS1	1.51396	4.82372	6.13222	9.27323e-07	7.14715e-06	5.35682
LINC00942	1.51327	3.771	3.16758	0.00349751	0.00791712	-2.70905
MN1	1.51278	4.52971	4.52162	8.7997e-05	0.000326164	0.852014
XAF1	1.51205	6.68204	5.63627	3.74738e-06	2.27665e-05	3.96858
SCARB1	1.51191	5.06284	6.91442	1.06333e-07	1.23628e-06	7.51609
LOC101929705	1.51107	4.25743	9.6378	9.74273e-11	4.6852e-09	14.5064
C6orf141	1.50755	3.35223	7.06929	6.97338e-08	8.81287e-07	7.93733
OR51E1	1.50644	4.16719	6.52978	3.06369e-07	2.91378e-06	6.46027
SNORA72	1.50536	4.2495	7.7398	1.15769e-08	2.04628e-07	9.73155
IL21R	1.50473	4.00578	7.19929	4.90341e-08	6.56973e-07	8.28907
CSF2RB	1.50444	6.11147	3.85334	0.00056392	0.0016189	-0.959336
PHKA2	1.50394	6.76603	5.55871	4.66697e-06	2.72541e-05	3.75083
OLR1	1.50339	5.01456	3.47419	0.00156799	0.00394715	-1.94457
FUT11	1.50039	6.25788	6.71973	1.81351e-07	1.90619e-06	6.98328
LHFPL2	1.49761	6.8865	6.34885	5.06369e-07	4.33855e-06	5.95941
ZAP70	1.49734	5.23481	6.57773	2.68301e-07	2.61361e-06	6.59258
DLGAP5	1.49684	3.25424	7.52497	2.04631e-08	3.28017e-07	9.16223
SAMD9	1.49521	5.5294	6.80186	1.44714e-07	1.58113e-06	7.20848
LY75	1.49467	6.97198	4.00172	0.00037519	0.00113751	-0.564088
MCM2	1.49349	6.37023	10.1933	2.63064e-11	1.68938e-09	15.8129
LOC100506691	1.49324	5.08141	3.99955	0.000377447	0.00114283	-0.569914
SLAMF7	1.49318	4.82912	5.54733	4.81986e-06	2.80033e-05	3.71885
THEMIS	1.49178	3.55268	4.18947	0.000223018	0.000727043	-0.0576795
KCNK17	1.49171	3.87717	11.8419	6.79809e-13	9.20059e-11	19.4509
KNTC1	1.48991	5.22861	7.68455	1.33963e-08	2.31397e-07	9.58564
S100A10	1.48938	8.60652	8.26369	2.95576e-09	7.13941e-08	11.0964
ARPC1B	1.48937	9.3234	5.96724	1.47337e-06	1.04188e-05	4.89611
HEY1	1.48799	6.75562	4.60515	6.95439e-05	0.000267043	1.083
ITIH3	1.48433	4.32008	5.6024	4.12417e-06	2.47179e-05	3.8735
HLA-B	1.48407	12.0006	6.21954	7.26328e-07	5.81437e-06	5.60006
CRNDE	1.48345	7.14471	3.85188	0.000566174	0.00162401	-0.963199
PRR7	1.48269	4.32722	10.561	1.13027e-11	8.7376e-10	16.655
PRDX4	1.48235	9.93293	7.67786	1.36355e-08	2.34342e-07	9.56796
TMEM87B	1.48222	5.72207	8.64441	1.12023e-09	3.2691e-08	12.0663
SIRPB2	1.48128	4.14741	6.51591	3.18375e-07	3.00287e-06	6.42194
TNFSF14	1.48046	4.6202	11.1397	3.09594e-12	2.97762e-10	17.9444
PIK3CG	1.4804	4.08112	6.93047	1.01772e-07	1.19342e-06	7.55985
GGTA1P	1.48034	7.38896	4.31992	0.000154981	0.000530572	0.297724
PCDHB6	1.47999	4.40868	5.89438	1.80862e-06	1.23505e-05	4.69225
LINC01426	1.47961	3.24072	5.71533	2.99699e-06	1.8897e-05	4.19042
SEMA4B	1.47881	7.94565	5.30705	9.52342e-06	4.98332e-05	3.04401
EMP3	1.4764	7.8827	5.74779	2.73447e-06	1.75112e-05	4.28147
PKM	1.4761	8.05442	7.88579	7.88615e-09	1.51128e-07	10.1153
LRRK1	1.47552	4.74217	9.00331	4.56686e-10	1.61583e-08	12.9632
SLC35G2	1.47465	4.92749	9.90291	5.18959e-11	2.86561e-09	15.1351
RNF125	1.47407	5.06594	5.01103	2.20542e-05	0.000101097	2.21388
DPY19L2P2	1.47251	4.49262	5.64004	3.70768e-06	2.25699e-05	3.97915
SLC2A3	1.47249	7.07143	3.79722	0.000657245	0.00184772	-1.10752
ITIH5	1.47073	7.38106	4.66303	5.90642e-05	0.000232021	1.24347
HCAR3	1.47001	4.20778	3.57326	0.00120382	0.00313441	-1.69097
FAM64A	1.46824	4.40806	10.8195	6.30595e-12	5.47389e-10	17.2363
TRAT1	1.46712	3.55118	4.45432	0.000106329	0.000385395	0.666494
OGFRL1	1.46682	6.45983	6.69248	1.95477e-07	2.02762e-06	6.90844
NCAPG	1.46595	3.41462	8.69868	9.77037e-10	2.92198e-08	12.203
AMICA1	1.46427	6.38224	5.04115	2.02485e-05	9.3976e-05	2.29821
[truncated: 1,602 more rows]
