# Supplementary material for: Bioinformatic analysis identifies potentially key differentially expressed genes in oncogenesis and progression of clear cell renal cell carcinoma
Source: PeerJ. 2019 Nov 26;7:e8096. doi: 10.7717/peerj.8096 (PMC6883955; doi:10.7717/peerj.8096)
Supplement: File S2 [file peerj-07-8096-s002.xlsx]

## Sheet: ACADM
	GAPHD		ACADM
Number	Cancer tissue	Paracancerous tissue	Cancer tissue	Paracancerous tissue
1	17.52	22.62	22.43	25.66
2	17.74	22.13	23.24	24.94
3	19.02	22.02	23.99	24.68
4	17.44	22.45	23.04	25.66
5	17.35	23.22	23.78	26.06
6	17.47	20.95	23.12	23.99
7	16.44	23.21	23.26	25.93
8	17.71	20.99	23.27	23.75
9	20.77	21.63	26.17	23.84
10	18.31	22.84	24.46	25.65
11	18.74	22.02	24.15	25.42
12	17.23	23.48	22.42	26.27
13	16.15	22.82	23.23	25.75
14	15.7	22.87	24.36	25.4
15	17.38	20.61	24.97	24
16	17.45	22.33	24.49	25.72
17	18.63	23.46	24.82	26.45
18	17.59	22.25	23.6	26.15
19	16.9	21.54	21.41	24.55
20	17.26	23.43	23.2	26.55
21	18.95	20.13	25.8	23.02
22	15.63	22.77	22.85	26.67
23	16.6	23.34	22.29	25.46
24	17.99	19.49	23.7	22.18
25	18.18	20.59	23.14	23.56
26	16.22	18.55	22.83	20.97
27	17.72	19.22	23.32	21.53
28	17.81	19.98	22.44	24.45
29	19.74	19.47	24.62	21.97
30	18.42	18.7	22.64	22.58
31	18.57	19.52	22.31	22.32
32	18.38	19.25	23.55	22.38
33	19.31	20.23	23.11	22.48
34	19.47	19.48	23.84	21.8
35	18.46	19.15	23.31	21.01
36	16.83	18.06	24.55	20.53
37	18.06	21.79	22.37	24.26
38	20.24	20.23	23.91	22.9
39	18.28	19.22	23.04	21.89
40	15.99	17.35	21.73	21.43
41	26.14	20.04	29.43	23.5
42	16.74	22.74	22.85	26.83
43	16.96	19.21	21.6	23.33
44	18.9	18.82	23.65	22.17
Mean value	18.0089	21.0045	23.552	23.9918
ΔCT			5.54318	2.98727
ΔΔCT			2.55591
2-(ΔΔCT)			0.170057
Standard deviation	1.68756	1.71798	1.34385	1.80612

## Sheet: CCNA2
	GAPHD		CCNA2
Number	Cancer tissue	Paracancerous tissue	Cancer tissue	Paracancerous tissue
1	17.52	22.62	27.53	38.38
2	17.74	22.13	32.66	33.3
3	19.02	22.02	30.98	34.62
4	17.44	22.45	30.36	33.49
5	17.35	23.22	31.41	37
6	17.47	20.95	31.62	33.14
7	16.44	23.21	30.97	34.41
8	17.71	20.99	30.49	33.55
9	20.77	21.63	31.15	33.2
10	18.31	22.84	31.13	32.98
11	18.74	22.02	29.73	33.67
12	17.23	23.48	30.47	36.1
13	16.15	22.82	30.75	34.15
14	15.7	22.87	28.84	34.16
15	17.38	20.61	29.88	33.99
16	17.45	22.33	32.78	34.84
17	18.63	23.46	31.9	35.52
18	17.59	22.25	32.28	34.6
19	16.9	21.54	28.92	34.4
20	17.26	23.43	30.53	34.48
21	18.95	20.13	30.72	33.59
22	15.63	22.77	28.67	32.91
23	16.6	23.34	29.89	33.36
24	17.99	19.49	31.02	33.59
25	18.18	20.59	31.74	36.76
26	16.22	18.55	30.74	32.74
27	17.72	19.22	30.46	33.88
28	17.81	19.98	30.85	38.92
29	19.74	19.47	32.81	33.26
30	18.42	18.7	28.74	34.94
31	18.57	19.52	29.98	35.51
32	18.38	19.25	26.9	36.13
33	19.31	20.23	29.44	35.37
34	19.47	19.48	28.92	32.86
35	18.46	19.15	29.87	32.2
36	16.83	18.06	27.88	30.61
37	18.06	21.79	30.98	36.92
38	20.24	20.23	32.46	35.88
39	18.28	19.22	31.84	32.87
40	15.99	17.35	30.6	31.33
41	26.14	20.04	36.15	34.34
42	16.74	22.74	29.51	37.22
43	16.96	19.21	29.39	33.82
44	18.9	18.82	30.56	34.09
Mean value	18.0089	21.0045	30.5568	34.3882
ΔCT			12.548	13.3836
ΔΔCT			-0.835682
2-(ΔΔCT)			1.7847
Standard deviation	1.68756	1.71798	1.59301	1.69438

## Sheet: CENPE
	GAPHD		CENPE
Number	Cancer tissue	Paracancerous tissue	Cancer tissue	Paracancerous tissue
1	17.52	22.62	30.06	40
2	17.74	22.13	36.64	37.5
3	19.02	22.02	34.85	37.67
4	17.44	22.45	32.63	36.66
5	17.35	23.22	34.95	40
6	17.47	20.95	34.78	36.39
7	16.44	23.21	33.71	37.09
8	17.71	20.99	32.85	36.94
9	20.77	21.63	35.15	37.02
10	18.31	22.84	33.86	36.19
11	18.74	22.02	33.12	36.99
12	17.23	23.48	33.77	40
13	16.15	22.82	33.71	38.2
14	15.7	22.87	31.4	40
15	17.38	20.61	31.94	36.79
16	17.45	22.33	35.45	40
17	18.63	23.46	34.48	40
18	17.59	22.25	34.76	40
19	16.9	21.54	31.44	37.99
20	17.26	23.43	34.04	40
21	18.95	20.13	33.05	36.73
22	15.63	22.77	32.78	38.52
23	16.6	23.34	33.04	40
24	17.99	19.49	33.92	38.33
25	18.18	20.59	33.17	40
26	16.22	18.55	32.15	36.94
27	17.72	19.22	33.92	38.57
28	17.81	19.98	33.59	40
29	19.74	19.47	36.92	36.34
30	18.42	18.7	37.83	40
31	18.57	19.52	33.24	40
32	18.38	19.25	33.65	40
33	19.31	20.23	33.14	38.64
34	19.47	19.48	32.68	36.92
35	18.46	19.15	34.51	36.62
36	16.83	18.06	30.52	35.07
37	18.06	21.79	33.51	40
38	20.24	20.23	35.13	40
39	18.28	19.22	35.99	38.16
40	15.99	17.35	34.24	33.31
41	26.14	20.04	33.65	38.25
42	16.74	22.74	32.63	40
43	16.96	19.21	31.36	40
44	18.9	18.82	32.56	37.24
Mean value	18.0089	21.0045	33.6539	38.297
ΔCT			15.645	17.2925
ΔΔCT			-1.6475
2-(ΔΔCT)			3.1329
Standard deviation	1.68756	1.71798	1.56953	1.66856

## Sheet: DTL
	GAPHD		DTL
Number	Cancer tissue	Paracancerous tissue	Cancer tissue	Paracancerous tissue
1	17.52	22.62	25.89	37.31
2	17.74	22.13	30.57	32.83
3	19.02	22.02	28.3	32.3
4	17.44	22.45	27.21	32.91
5	17.35	23.22	28.14	33.45
6	17.47	20.95	28.37	31.3
7	16.44	23.21	26.06	32.58
8	17.71	20.99	27.47	30.73
9	20.77	21.63	29.27	32.61
10	18.31	22.84	27.37	32.27
11	18.74	22.02	27.5	31.76
12	17.23	23.48	27.47	33.05
13	16.15	22.82	26.64	33.47
14	15.7	22.87	25.23	32.97
15	17.38	20.61	27.82	31.63
16	17.45	22.33	30.06	33.14
17	18.63	23.46	28.74	33.76
18	17.59	22.25	28.03	32.97
19	16.9	21.54	25.86	34.05
20	17.26	23.43	25.65	33.59
21	18.95	20.13	27.88	31.07
22	15.63	22.77	26	33.8
23	16.6	23.34	26.07	34.46
24	17.99	19.49	26.14	32.71
25	18.18	20.59	27.12	33.5
26	16.22	18.55	26.57	31.03
27	17.72	19.22	26.33	38.18
28	17.81	19.98	27.67	34.43
29	19.74	19.47	28.53	31.02
30	18.42	18.7	25.6	33.07
31	18.57	19.52	26.1	32.41
32	18.38	19.25	25.2	34.15
33	19.31	20.23	27.27	33.38
34	19.47	19.48	26.58	31.77
35	18.46	19.15	27.74	32.43
36	16.83	18.06	25.42	29.54
37	18.06	21.79	28.24	35.79
38	20.24	20.23	28.27	33.47
39	18.28	19.22	25.18	32.11
40	15.99	17.35	26.34	26.92
41	26.14	20.04	33.15	32.86
42	16.74	22.74	25.37	33.38
43	16.96	19.21	24.99	28.68
44	18.9	18.82	26.71	32.77
Mean value	18.0089	21.0045	27.1845	32.7639
ΔCT			9.17568	11.7593
ΔΔCT			-2.58364
2-(ΔΔCT)			5.99449
Standard deviation	1.68756	1.71798	1.59819	1.87826

## Sheet: KIF4A
	GAPHD		KIF4A
Number	Cancer tissue	Paracancerous tissue	Cancer tissue	Paracancerous tissue
1	17.52	22.62	26.38	36.22
2	17.74	22.13	30.26	31.98
3	19.02	22.02	28.88	33.77
4	17.44	22.45	27.97	31.81
5	17.35	23.22	29.27	32.59
6	17.47	20.95	29.54	31.54
7	16.44	23.21	28.01	31.69
8	17.71	20.99	28.06	30.69
9	20.77	21.63	29.42	32.11
10	18.31	22.84	29	32.07
11	18.74	22.02	28.33	31.9
12	17.23	23.48	28.63	35.45
13	16.15	22.82	28.24	33.34
14	15.7	22.87	25.68	30.96
15	17.38	20.61	26.41	31.7
16	17.45	22.33	29.61	32.91
17	18.63	23.46	29.1	33.49
18	17.59	22.25	28.5	32.74
19	16.9	21.54	26.29	33.42
20	17.26	23.43	28.73	32.91
21	18.95	20.13	28.23	31.32
22	15.63	22.77	27.16	33.09
23	16.6	23.34	28.3	33.57
24	17.99	19.49	28.05	32.36
25	18.18	20.59	27.84	33.27
26	16.22	18.55	27.39	32.36
27	17.72	19.22	27.41	32.98
28	17.81	19.98	29.09	34.19
29	19.74	19.47	29.99	31.38
30	18.42	18.7	27.19	33.82
31	18.57	19.52	27.39	33.66
32	18.38	19.25	35.84	35.23
33	19.31	20.23	28.76	34.17
34	19.47	19.48	28.13	32.9
35	18.46	19.15	29.44	32.6
36	16.83	18.06	25.35	30.17
37	18.06	21.79	28.69	29.06
38	20.24	20.23	29.21	33.93
39	18.28	19.22	28.39	31.3
40	15.99	17.35	27.73	28.56
41	26.14	20.04	33.73	32.63
42	16.74	22.74	26.75	36.05
43	16.96	19.21	27.27	31.37
44	18.9	18.82	28.17	34.12
Mean value	18.0089	21.0045	28.4502	32.5851
ΔCT			10.4414	11.5806
ΔΔCT			-1.13921
2-(ΔΔCT)			2.2026
Standard deviation	1.68756	1.71798	1.775	1.49726

## Sheet: KIF20A
	GAPHD		KIF20A
Number	Cancer tissue	Paracancerous tissue	Cancer tissue	Paracancerous tissue
1	17.52	22.62	30.49	36.6
2	17.74	22.13	32.79	35.43
3	19.02	22.02	34.14	36.7
4	17.44	22.45	31.53	35.72
5	17.35	23.22	34.16	37.82
6	17.47	20.95	32.45	34.89
7	16.44	23.21	31.76	35.78
8	17.71	20.99	32.73	35.75
9	20.77	21.63	34.95	40
10	18.31	22.84	33.18	35.71
11	18.74	22.02	33.9	40
12	17.23	23.48	32.36	35.87
13	16.15	22.82	32.52	36.83
14	15.7	22.87	29.39	37.11
15	17.38	20.61	30.62	37
16	17.45	22.33	35.63	37.83
17	18.63	23.46	34.15	37.75
18	17.59	22.25	33.6	37.58
19	16.9	21.54	29.55	37.29
20	17.26	23.43	32.86	38.74
21	18.95	20.13	32.29	36.78
22	15.63	22.77	29.3	37.79
23	16.6	23.34	32.27	38.68
24	17.99	19.49	32.88	34.24
25	18.18	20.59	32.83	33.95
26	16.22	18.55	31.27	37.64
27	17.72	19.22	32.24	38.4
28	17.81	19.98	34	40
29	19.74	19.47	36.9	37.14
30	18.42	18.7	32.17	40
31	18.57	19.52	32.6	40
32	18.38	19.25	32.79	40
33	19.31	20.23	34.1	40
34	19.47	19.48	33	38.6
35	18.46	19.15	34.51	37.77
36	16.83	18.06	30.46	34.36
37	18.06	21.79	33.61	40
38	20.24	20.23	35.02	40
39	18.28	19.22	34.93	37.97
40	15.99	17.35	33.25	32.42
41	26.14	20.04	32.79	38.71
42	16.74	22.74	30.93	40
43	16.96	19.21	32.04	38.23
44	18.9	18.82	33.8	38.75
Mean value	18.0089	21.0045	32.7895	37.5416
ΔCT			14.7807	16.537
ΔΔCT			-1.75636
2-(ΔΔCT)			3.37845
Standard deviation	1.68756	1.71798	1.61761	1.90482

## Sheet: MELK
	GAPHD		MELK
Number	Cancer tissue	Paracancerous tissue	Cancer tissue	Paracancerous tissue
1	17.52	22.62	24.54	28.69
2	17.74	22.13	24.64	27.81
3	19.02	22.02	23.24	25.26
4	17.44	22.45	24.84	27.49
5	17.35	23.22	23.81	28.37
6	17.47	20.95	27.78	29.9
7	16.44	23.21	23.85	29.31
8	17.71	20.99	26.11	26.31
9	20.77	21.63	25.55	29.89
10	18.31	22.84	25.87	31
11	18.74	22.02	24.35	26.92
12	17.23	23.48	21.71	27.13
13	16.15	22.82	23.09	31.47
14	15.7	22.87	23.83	29.2
15	17.38	20.61	26.43	27.17
16	17.45	22.33	24.63	31.7
17	18.63	23.46	28.88	26.93
18	17.59	22.25	24.03	29.64
19	16.9	21.54	24.41	23.74
20	17.26	23.43	23.18	30.41
21	18.95	20.13	24.6	28.69
22	15.63	22.77	24.2	29.41
23	16.6	23.34	23.98	27.14
24	17.99	19.49	22.98	25.5
25	18.18	20.59	24	31
26	16.22	18.55	24.95	30.29
27	17.72	19.22	23.39	31.77
28	17.81	19.98	27.07	31.65
29	19.74	19.47	23.7	31.76
30	18.42	18.7	24.52	27.91
31	18.57	19.52	21.56	24.74
32	18.38	19.25	20.62	27.77
33	19.31	20.23	24.95	30.49
34	19.47	19.48	21.8	29.26
35	18.46	19.15	24.77	23.96
36	16.83	18.06	25.09	28.61
37	18.06	21.79	25.15	30.39
38	20.24	20.23	25.62	30.46
39	18.28	19.22	24.15	29.79
40	15.99	17.35	26.74	27.6
41	26.14	20.04	25.29	28.92
42	16.74	22.74	24.41	30.37
43	16.96	19.21	24.3	31.79
44	18.9	18.82	23.39	28.79
Mean value	18.0089	21.0045	24.4545	28.7818
ΔCT			6.44568	7.77727
ΔΔCT			-1.33159
2-(ΔΔCT)			2.5168
Standard deviation	1.68756	1.71798	1.55173	2.1158

## Sheet: NCAPG
	GAPHD		NCAPG
Number	Cancer tissue	Paracancerous tissue	Cancer tissue	Paracancerous tissue
1	17.52	22.62	27.03	37.36
2	17.74	22.13	31.85	33.82
3	19.02	22.02	30.19	34.68
4	17.44	22.45	28.72	32.7
5	17.35	23.22	31.14	40
6	17.47	20.95	30.17	31.12
7	16.44	23.21	28.67	32.79
8	17.71	20.99	28.87	32.28
9	20.77	21.63	30.18	33.37
10	18.31	22.84	28.98	32.47
11	18.74	22.02	28.7	32.46
12	17.23	23.48	29.22	35.69
13	16.15	22.82	28.64	37.23
14	15.7	22.87	25.96	33.44
15	17.38	20.61	27.65	32.07
16	17.45	22.33	31.17	33.95
17	18.63	23.46	30.2	40
18	17.59	22.25	30.36	32.65
19	16.9	21.54	27.2	33.88
20	17.26	23.43	28.76	35.42
21	18.95	20.13	29.66	32.63
22	15.63	22.77	26.87	35.69
23	16.6	23.34	27.74	33.85
24	17.99	19.49	28.65	32.58
25	18.18	20.59	29.13	35.01
26	16.22	18.55	27.1	33.09
27	17.72	19.22	28.01	33.43
28	17.81	19.98	28.78	40
29	19.74	19.47	30.45	31.47
30	18.42	18.7	27.17	33.37
31	18.57	19.52	27.46	33.69
32	18.38	19.25	34.7	40
33	19.31	20.23	27.93	34.12
34	19.47	19.48	27.65	33.27
35	18.46	19.15	29.13	33.12
36	16.83	18.06	26.22	29.93
37	18.06	21.79	29.67	37.13
38	20.24	20.23	29.66	36.81
39	18.28	19.22	29.34	33.16
40	15.99	17.35	28.71	29.14
41	26.14	20.04	33.44	33.26
42	16.74	22.74	27.75	34.57
43	16.96	19.21	27.61	40
44	18.9	18.82	28.22	34.84
Mean value	18.0089	21.0045	28.9707	34.3532
ΔCT			10.9618	13.3486
ΔΔCT			-2.38682
2-(ΔΔCT)			5.23003
Standard deviation	1.68756	1.71798	1.72429	2.62989

## Sheet: NUSAP1
	GAPHD		NUSAP1
Number	Cancer tissue	Paracancerous tissue	Cancer tissue	Paracancerous tissue
1	17.52	22.62	24.13	29.73
2	17.74	22.13	26.62	27.96
3	19.02	22.02	26.2	27.53
4	17.44	22.45	24.37	28.34
5	17.35	23.22	25.94	28.51
6	17.47	20.95	26.77	28.25
7	16.44	23.21	24.36	27.59
8	17.71	20.99	25.72	28.63
9	20.77	21.63	27	28.7
10	18.31	22.84	25.61	28.45
11	18.74	22.02	25.96	27.65
12	17.23	23.48	26.12	28.15
13	16.15	22.82	26.05	28.59
14	15.7	22.87	24.02	27.11
15	17.38	20.61	24.37	27.92
16	17.45	22.33	28.07	28.99
17	18.63	23.46	26.74	28.62
18	17.59	22.25	25.62	28.87
19	16.9	21.54	23.68	28.97
20	17.26	23.43	24.74	29.2
21	18.95	20.13	25.57	28.44
22	15.63	22.77	25.28	28.43
23	16.6	23.34	24.8	28.84
24	17.99	19.49	26.22	27.48
25	18.18	20.59	24.84	26.74
26	16.22	18.55	25.59	27.08
27	17.72	19.22	24.53	27.69
28	17.81	19.98	24.22	29.13
29	19.74	19.47	27.55	27.14
30	18.42	18.7	23.53	28.47
31	18.57	19.52	24.23	28.26
32	18.38	19.25	28.4	29.01
33	19.31	20.23	25.6	29.11
34	19.47	19.48	23.73	27.32
35	18.46	19.15	24.58	26.98
36	16.83	18.06	25.49	26.61
37	18.06	21.79	25.83	31.18
38	20.24	20.23	26.26	28.79
39	18.28	19.22	25.8	28.19
40	15.99	17.35	23.76	25.9
41	26.14	20.04	30.54	29.16
42	16.74	22.74	24.26	31.35
43	16.96	19.21	23.85	28.68
44	18.9	18.82	24.54	28.06
Mean value	18.0089	21.0045	25.4793	28.3136
ΔCT			7.47045	7.30909
ΔΔCT			0.161364
2-(ΔΔCT)			0.894179
Standard deviation	1.68756	1.71798	1.40839	1.02769

## Sheet: PBK
	GAPHD		PBK
Number	Cancer tissue	Paracancerous tissue	Cancer tissue	Paracancerous tissue
1	17.52	22.62	27.53	29.07
2	17.74	22.13	32.8	29.56
3	19.02	22.02	29.16	28.63
4	17.44	22.45	28.55	29.55
5	17.35	23.22	29.44	29.15
6	17.47	20.95	29.23	29.56
7	16.44	23.21	27.62	29.18
8	17.71	20.99	28.59	29.15
9	20.77	21.63	30.45	29.92
10	18.31	22.84	28.79	29.61
11	18.74	22.02	29.23	28.9
12	17.23	23.48	28.39	28.44
13	16.15	22.82	28.25	29.62
14	15.7	22.87	25.63	29.96
15	17.38	20.61	27.31	30.39
16	17.45	22.33	28.8	29.92
17	18.63	23.46	30.04	29.44
18	17.59	22.25	28.57	30.52
19	16.9	21.54	26.16	30.2
20	17.26	23.43	28.33	30.94
21	18.95	20.13	28.38	30.86
22	15.63	22.77	26.49	30.64
23	16.6	23.34	27.65	30.59
24	17.99	19.49	28.6	29.07
25	18.18	20.59	27.43	28.81
26	16.22	18.55	26.64	32.17
27	17.72	19.22	27.51	31.94
28	17.81	19.98	29.58	31.48
29	19.74	19.47	31.69	31.88
30	18.42	18.7	27.9	32.31
31	18.57	19.52	28.31	31.34
32	18.38	19.25	28.66	34.38
33	19.31	20.23	29.88	34.02
34	19.47	19.48	29.43	33.91
35	18.46	19.15	30.33	32.01
36	16.83	18.06	27.87	29.8
37	18.06	21.79	28.82	33.99
38	20.24	20.23	29.39	34.5
39	18.28	19.22	28.9	31.3
40	15.99	17.35	28.52	28.04
41	26.14	20.04	31.88	31.97
42	16.74	22.74	26.72	32.5
43	16.96	19.21	27.53	31.51
44	18.9	18.82	30.01	32.24
Mean value	18.0089	21.0045	28.6589	30.7493
ΔCT			10.65	9.74477
ΔΔCT			0.905227
2-(ΔΔCT)			0.533949
Standard deviation	1.68756	1.71798	1.43492	1.68758

[truncated: 4 more sheets: RRM2, TOP2A, TPX2, UBE2C]
